# Supplementary material for: Bioactivity of the cannabigerol cannabinoid and its analogues – the role of 3-dimensional conformation
Source: Royal Society of Chemistry journal article supplement (doi:10.1039/d3ob00383c), 2023-01-01
Supplement: d3ob00383c1.pdf [file d3ob00383c1.pdf]

# Supplementary Information for:

## Bioactivity of the Cannabigerol Cannabinoid and its Analogues – The role of Conformational Structure and Stability

Mohammed Salha,<sup>a,b</sup> Henry Adenusi,<sup>c</sup> John Dupuis,<sup>d</sup> Enrico Bodo,<sup>a</sup> Bruno Botta,<sup>e</sup> Iain Mckenzie,<sup>f</sup>  
Rickey Y. Yada,<sup>d</sup> David Farrar,<sup>g</sup> Jakob Magolan,<sup>b,g</sup> Kun V. Tian<sup>d,f,g,\*</sup> and Gregory A. Chass,<sup>f,g,h,\*</sup>

<sup>a</sup> Department of Chemistry, University of Rome “La Sapienza”, Piazzale Aldo Moro, 00185, Rome, Italy

<sup>b</sup> Department of Biochemistry and Biomedical Sciences and Michael G. DeGroot Institute of Infectious Disease Research, McMaster University, Hamilton, Ontario L8N 3Z5, Canada

<sup>c</sup> Hong Kong Quantum AI Lab, 17 Science Park West Avenue, Hong Kong, China

<sup>d</sup> Faculty of Land and Food Systems, The University of British Columbia, Vancouver, British Columbia, V6T 1Z4, Canada

<sup>e</sup> Department of Chemical Science and Pharmaceutical Technologies, Sapienza University of Rome, Piazzale Aldo Moro 5, 00185, Rome, Italy

<sup>f</sup> Centre for Molecular and Materials Science, TRIUMF, 4004 Wesbrook Mall, Vancouver, BC, V6T 2A3, Canada

<sup>g</sup> Department of Chemistry and Chemical Biology, McMaster University, Hamilton, Ontario, L8S 4M1, Canada

<sup>h</sup> School of Physical and Chemical Sciences, Queen Mary University of London, London E1 4NS, United Kingdom

| <b>Contents</b>                                               | <b>Page</b> |
|---------------------------------------------------------------|-------------|
| Ramachandran Plots of Cannabigerocin energetics               | S2-S4       |
| Atoms In Molecules Analyses & Molecular Graphs                | S5          |
| CBG-V geometries and energetics                               | S6          |
| Visual guide to supplementary material (Ex: H <sub>2</sub> O) | S7          |
| Optimised geometries + energetics (B3LYP/6-311G(d,p))         | S8-73       |

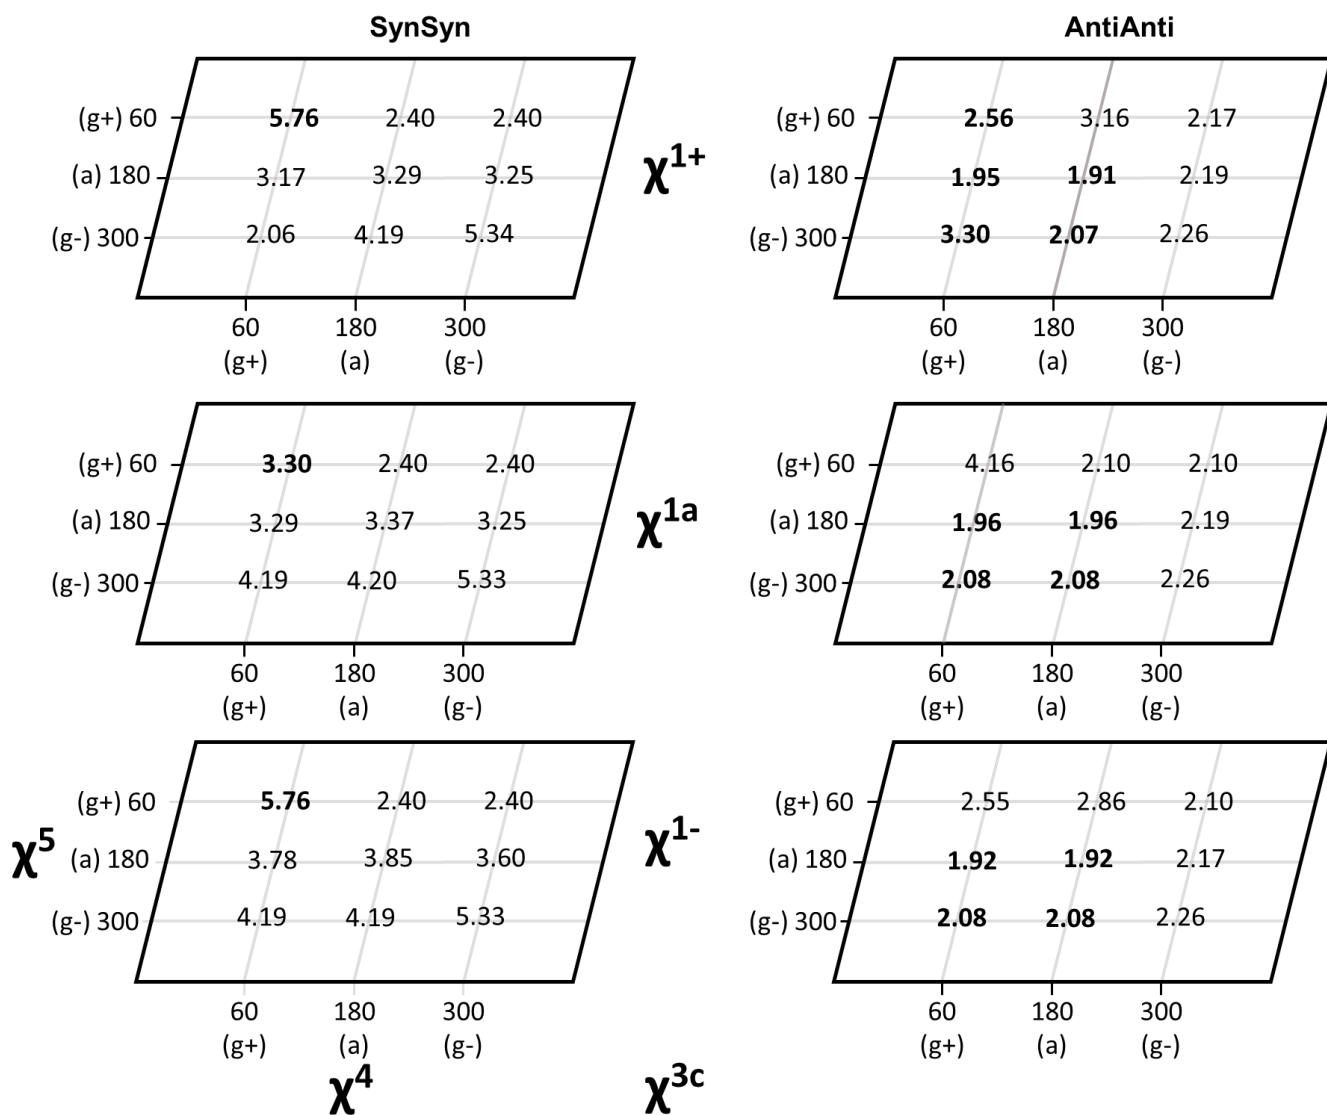

**Figure S1.** Ramachandran plots of the relative free-energies (kcal) for each of the differing geometries of the  $\chi^3$  *cis* isomers. The bold numbers highlight cases where alpha hydrogens bisected each other across opposite ends of the C=C double bond. Numbers that are adjacent and share the same value are indicative of degenerate cases or free-energy.

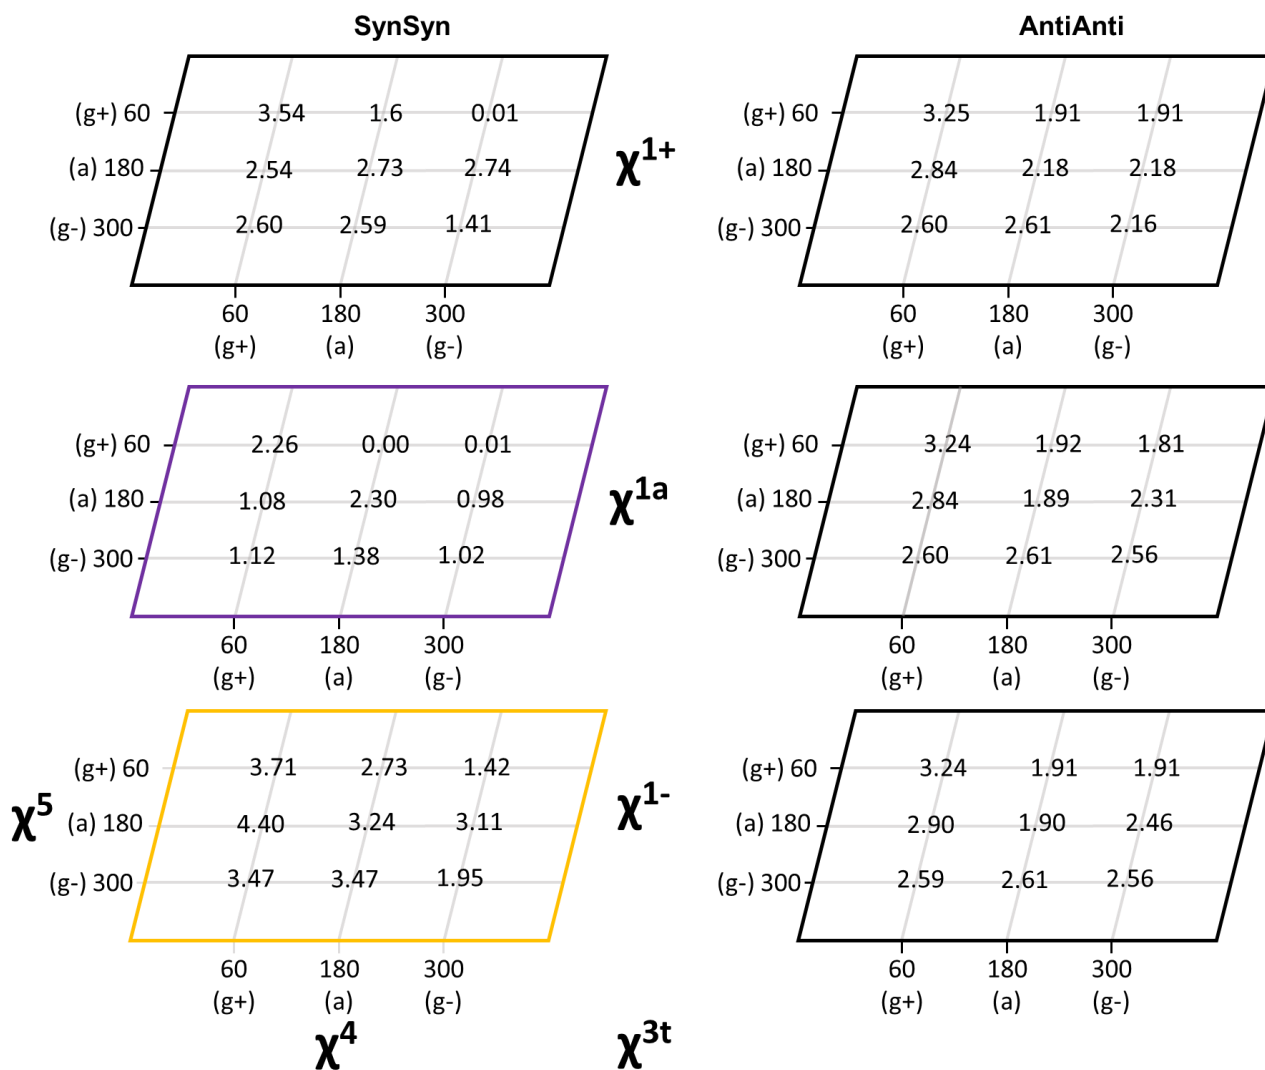

**Figure S2.** Ramachandran plots with the relative free energies (kcal) for each of the  $\chi^3$  *trans* conformers, with yellow and purple used to indicate differing structures resulting from differing orientations of the OH rotors (see **Figure S3**).

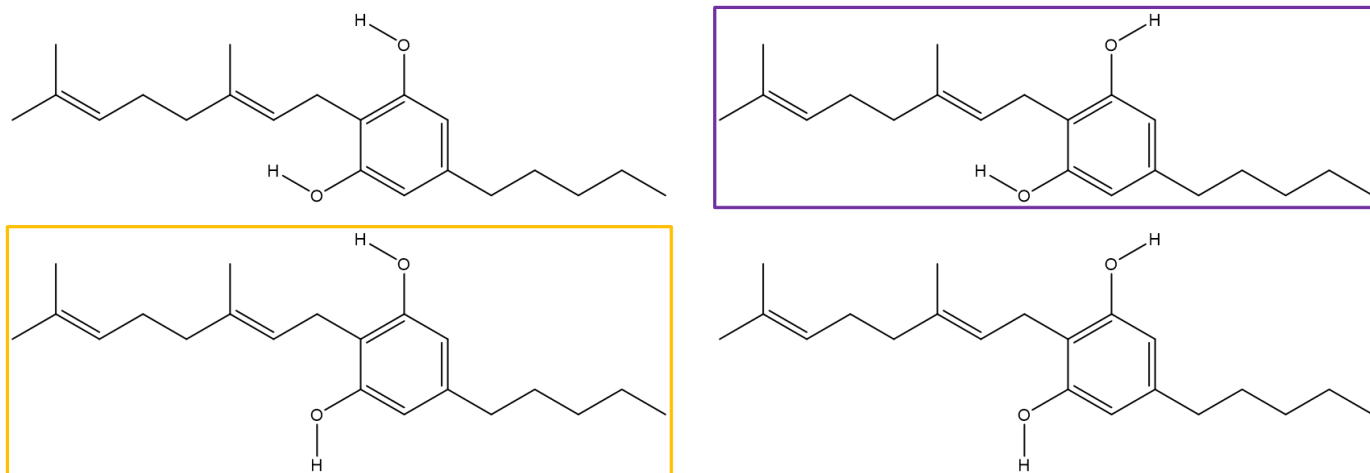

**Figure S3.** Schematic representation of the structural conformers generated by differing OH-rotor placements, defined relative to the geranyl chain. (*Top Left*) *syn-syn* conformer, (*Bottom Right*) *anti-anti*, (*Top Right* and *Bottom Left*) the mixed *anti-syn* and *syn-anti* cases, respectively.

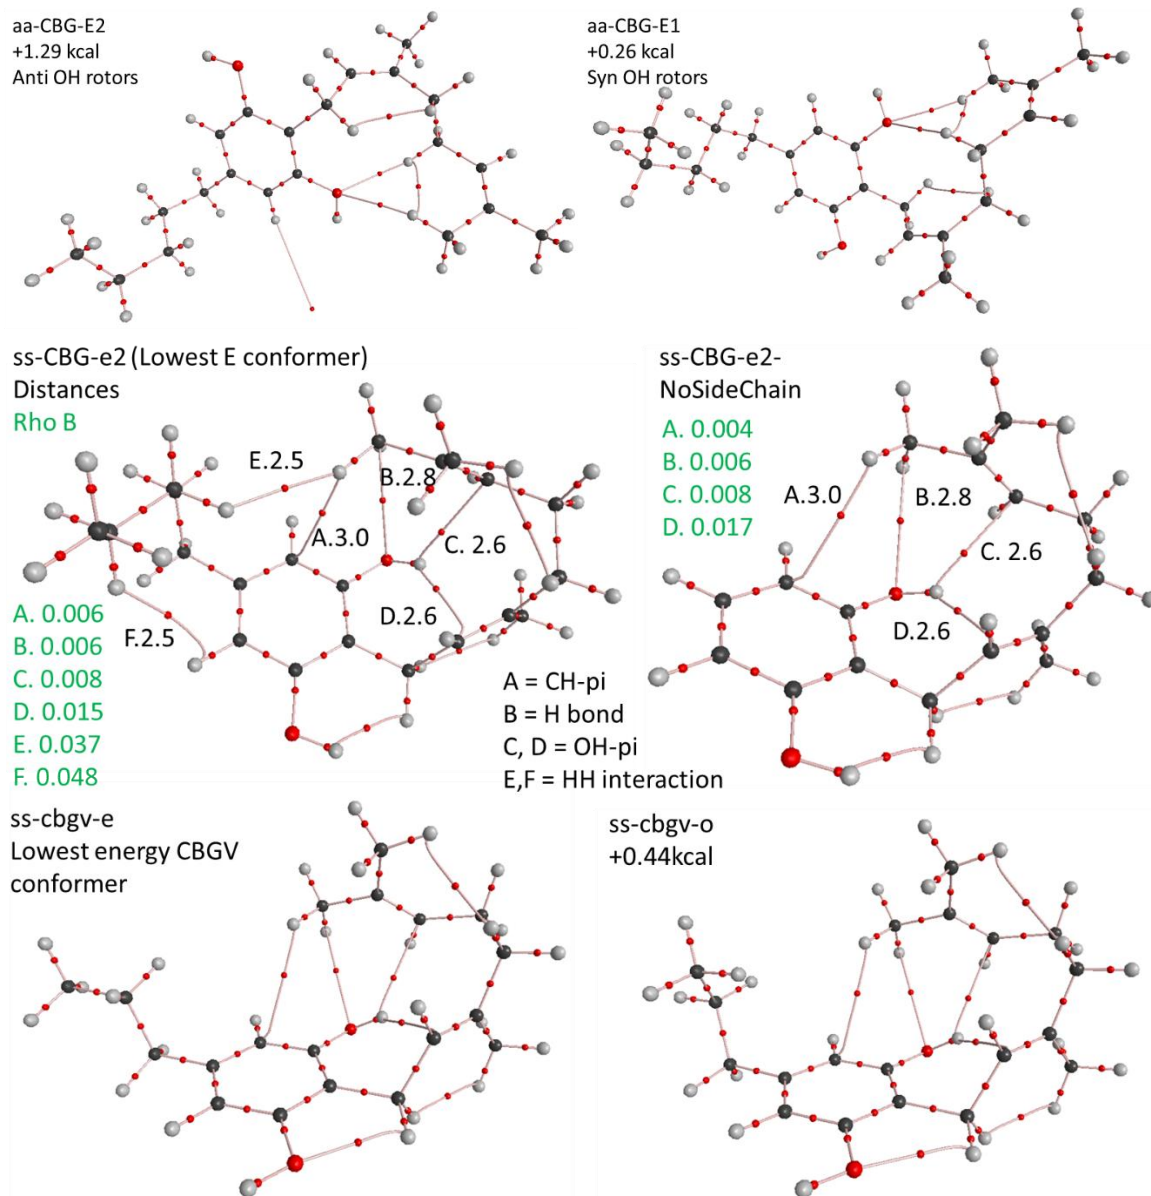

**Figure S4** Molecular graphs plotted from the Atoms In Molecules (AIM) wavefunction analyses of the following CBG conformers: (*Top*) two *anti-anti* conformers, (*Middle Left*) the lowest free-energy conformer, (*Middle Right*) system conformer with H-atom as side-chain, (*Bottom*) two lowest free-energy conformers for CBGV; this conformer is devoid of the weakly-polar intra-molecular H-H interaction (between the geranyl and propyl side chains).

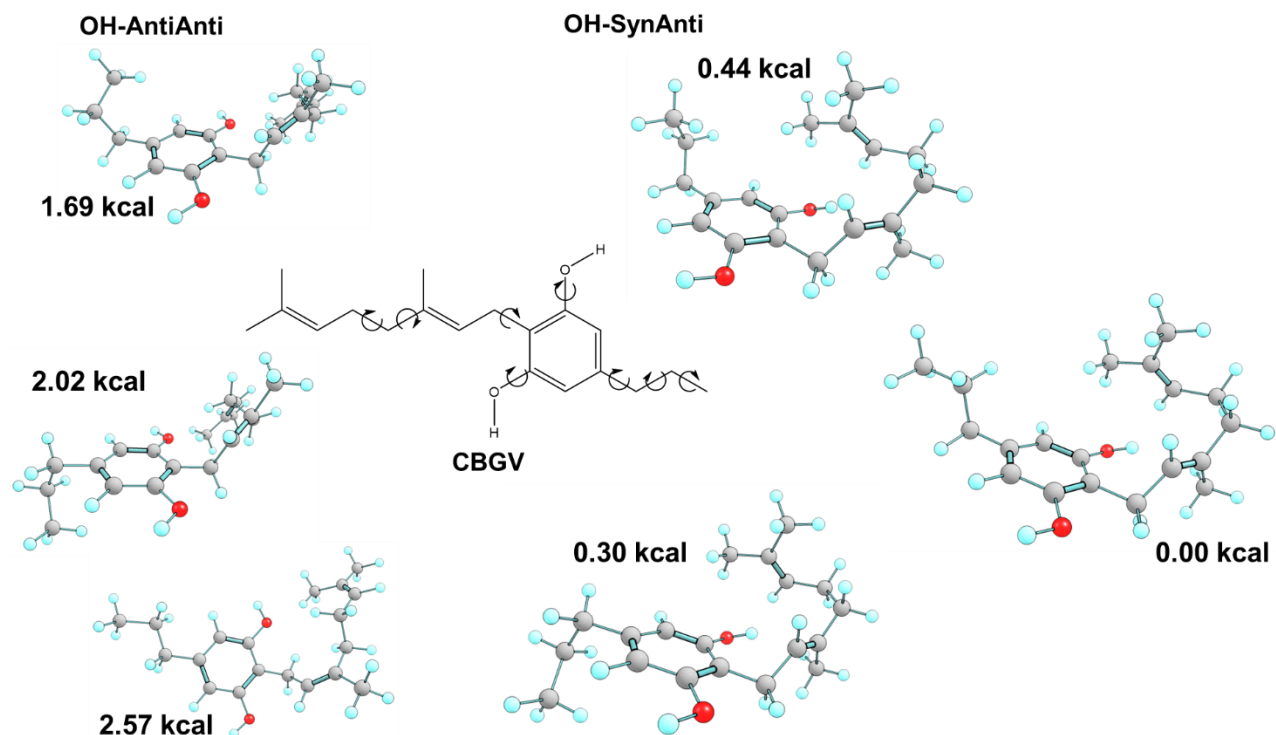

**Figure S5** CBGV Poses and relative energetics in kcal. Note the lowest energy conformer has the side chain extended outwards. CBGV's side chain is too short to successfully perform the H-H interaction stabilising the intramolecular 'staple'

## Exemplary Data Card of geometry optimised stationary points

**Example:** H<sub>2</sub>O molecule

### FILE NAME + Graphical Representation

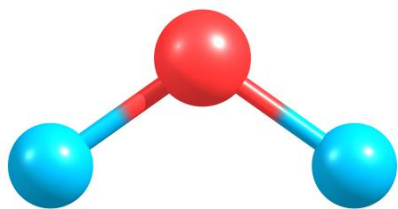

### Cartesian Coordinates of all geometry optimised stationary points

| Atom type | X          | Y          | Z          |
|-----------|------------|------------|------------|
| O         | 1.34146346 | 1.62020904 | 0.00000000 |
| H         | 2.30146346 | 1.62020904 | 0.00000000 |
| H         | 1.02100888 | 2.52514487 | 0.00000000 |

### Analytical frequencies of normal modes of vibration

Frequencies -- 1664.9645 3800.9563 3914.2425

### Thermodynamic properties reported

Zero-point correction= 0.021370 (Hartree/Particle)  
Thermal correction to Energy= 0.024205  
Thermal correction to Enthalpy= 0.025149  
Thermal correction to Gibbs Free Energy = 0.003713  
Sum of electronic and zero-point Energies = -76.398367  
Sum of electronic and thermal Energies = -76.395532  
Sum of electronic and thermal Enthalpies = -76.394588  
Sum of electronic and thermal Free Energies = -76.416024

**CBG**  
ss-CBG-U3

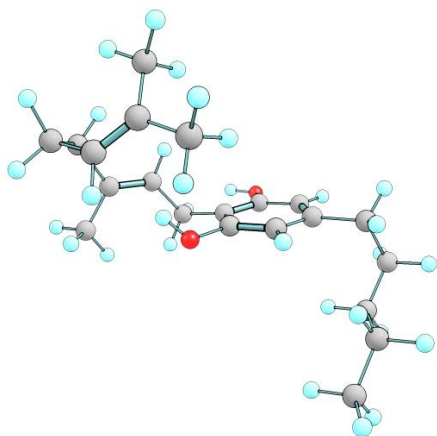

55 Atoms

|   |           |           |           |
|---|-----------|-----------|-----------|
| C | -0.322421 | -0.143469 | -0.289287 |
| C | -1.450953 | 0.447646  | 0.281379  |
| C | -2.332993 | -0.316874 | 1.05093   |
| C | -2.051097 | -1.670488 | 1.252639  |
| C | -0.919986 | -2.257916 | 0.677213  |
| C | -0.039528 | -1.513871 | -0.130211 |
| H | -1.617036 | 1.507798  | 0.122416  |
| H | -2.702521 | -2.291101 | 1.860273  |
| O | 0.489211  | 0.657166  | -1.054745 |
| H | 1.416463  | 0.403651  | -0.89927  |
| O | -0.746939 | -3.592908 | 0.934422  |
| H | 0.105454  | -3.89054  | 0.590743  |
| C | 1.159422  | -2.115537 | -0.844509 |
| C | 2.466256  | -1.560068 | -0.325799 |
| H | 1.053398  | -1.926012 | -1.917019 |
| H | 1.165127  | -3.209023 | -0.745323 |
| C | 3.450163  | -0.963015 | -1.022002 |
| H | 2.579916  | -1.629265 | 0.755786  |
| C | 4.639754  | -0.382549 | -0.289856 |
| H | 4.58724   | -0.667968 | 0.765047  |
| H | 5.568945  | -0.808969 | -0.692303 |
| C | 4.733332  | 1.167592  | -0.388787 |
| C | 3.432795  | 1.877758  | -0.085794 |
| H | 5.061819  | 1.443997  | -1.395999 |
| H | 5.529545  | 1.496144  | 0.290453  |
| C | 2.839326  | 1.993069  | 1.113154  |
| H | 2.910879  | 2.300898  | -0.944124 |
| C | 1.499583  | 2.668805  | 1.269094  |
| H | 0.762155  | 1.971563  | 1.686827  |
| H | 1.566853  | 3.514325  | 1.96611   |
| H | 1.108076  | 3.027299  | 0.314642  |
| C | 3.452574  | -0.771366 | -2.519249 |
| H | 3.383173  | 0.292865  | -2.77677  |
| H | 2.636797  | -1.290138 | -3.02483  |
| H | 4.39689   | -1.132948 | -2.943    |
| C | 3.424073  | 1.446094  | 2.391837  |
| H | 3.384778  | 2.199248  | 3.188281  |
| H | 4.46016   | 1.118205  | 2.285275  |
| H | 2.834261  | 0.589165  | 2.743352  |
| C | -3.586449 | 0.294839  | 1.638483  |
| H | -3.509734 | 1.386881  | 1.608421  |
| H | -3.668444 | 0.017334  | 2.696461  |

|                |         |         |         |
|----------------|---------|---------|---------|
| Frequencies -- | 21.2300 | 24.9341 | 25.6674 |
| Frequencies -- | 31.0639 | 39.7655 | 57.3746 |
| Frequencies -- | 63.2080 | 84.6039 | 91.9227 |

|                                              |                             |
|----------------------------------------------|-----------------------------|
| Zero-point correction=                       | 0.487662 (Hartree/Particle) |
| Thermal correction to Energy=                | 0.513948                    |
| Thermal correction to Enthalpy=              | 0.514893                    |
| Thermal correction to Gibbs Free Energy=     | 0.429460                    |
| Sum of electronic and zero-point Energies=   | -969.567832                 |
| Sum of electronic and thermal Energies=      | -969.541546                 |
| Sum of electronic and thermal Enthalpies=    | -969.540602                 |
| Sum of electronic and thermal Free Energies= | -969.626034                 |

**ss-CBG-u2**

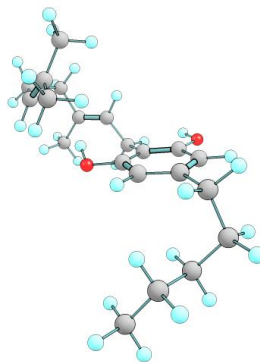

55 Atoms

|   |           |           |           |
|---|-----------|-----------|-----------|
| C | -0.331545 | 0.205912  | 0.294915  |
| C | -1.479192 | -0.330599 | -0.290741 |
| C | -2.349532 | 0.490617  | -1.014843 |
| C | -2.034689 | 1.84407   | -1.158449 |
| C | -0.881624 | 2.375897  | -0.571997 |
| C | -0.013179 | 1.574248  | 0.191586  |
| H | -1.670161 | -1.392454 | -0.177897 |
| H | -2.676426 | 2.507437  | -1.730259 |
| O | 0.464098  | -0.647937 | 1.01833   |
| H | 1.396987  | -0.412843 | 0.867343  |
| O | -0.674922 | 3.715541  | -0.774292 |
| H | 0.188823  | 3.974805  | -0.427859 |
| C | 1.210844  | 2.111154  | 0.914697  |
| C | 2.493881  | 1.536079  | 0.358737  |
| H | 1.110983  | 1.882821  | 1.980238  |
| H | 1.249689  | 3.207039  | 0.858636  |
| C | 3.470606  | 0.890407  | 1.020826  |
| H | 2.593469  | 1.63557   | -0.72188  |
| C | 4.63305   | 0.300921  | 0.252991  |
| H | 4.566325  | 0.610926  | -0.794184 |
| H | 5.578758  | 0.698264  | 0.646768  |
| C | 4.694705  | -1.252501 | 0.315034  |
| C | 3.373542  | -1.926793 | 0.01942   |
| H | 5.035311  | -1.559594 | 1.3093    |
| H | 5.471047  | -1.58222  | -0.386171 |
| C | 2.76317   | -2.011569 | -1.173593 |
| H | 2.852045  | -2.348645 | 0.878677  |
| C | 1.406027  | -2.65328  | -1.322555 |
| H | 0.68075   | -1.933181 | -1.722406 |
| H | 1.445258  | -3.490647 | -2.031475 |
| H | 1.016915  | -3.015099 | -0.36844  |
| C | 3.490137  | 0.653864  | 2.511385  |
| H | 3.398333  | -0.415596 | 2.737956  |
| H | 2.694779  | 1.176717  | 3.0445    |
| H | 4.449093  | 0.979861  | 2.931203  |
| C | 3.345235  | -1.460721 | -2.451847 |
| C | 3.282897  | -2.203308 | -3.256755 |
| H | 4.388542  | -1.154147 | -2.352712 |
| H | 2.768534  | -0.58842  | -2.786803 |
| C | -3.627982 | -0.058641 | -1.609143 |
| H | -3.544896 | -1.144636 | -1.722618 |
| H | -3.767731 | 0.350286  | -2.616933 |

|                |         |         |         |
|----------------|---------|---------|---------|
| Frequencies -- | 16.3917 | 24.7670 | 25.7267 |
| Frequencies -- | 33.1665 | 43.8051 | 58.3892 |
| Frequencies -- | 65.6944 | 89.3660 | 92.7062 |

|                                              |                             |
|----------------------------------------------|-----------------------------|
| Zero-point correction=                       | 0.487790 (Hartree/Particle) |
| Thermal correction to Energy=                | 0.514001                    |
| Thermal correction to Enthalpy=              | 0.514946                    |
| Thermal correction to Gibbs Free Energy=     | 0.429672                    |
| Sum of electronic and zero-point Energies=   | -969.567703                 |
| Sum of electronic and thermal Energies=      | -969.541491                 |
| Sum of electronic and thermal Enthalpies=    | -969.540547                 |
| Sum of electronic and thermal Free Energies= | -969.625821                 |



ss-cbg-u.log

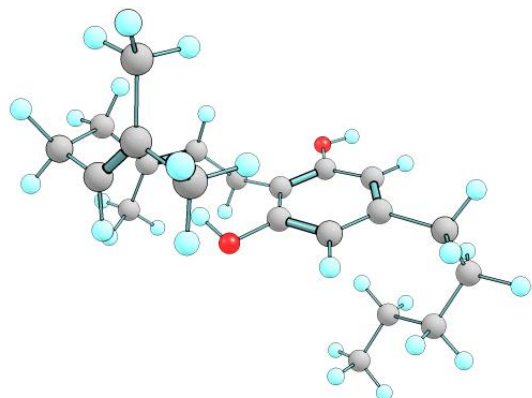

55 Atoms

|   |           |           |           |
|---|-----------|-----------|-----------|
| C | -0.393797 | 0.00383   | -0.188475 |
| C | -1.41533  | 0.948817  | -0.050992 |
| C | -2.386358 | 0.795059  | 0.940311  |
| C | -2.29838  | -0.297249 | 1.810712  |
| C | -1.274923 | -1.238026 | 1.665037  |
| C | -0.308611 | -1.120931 | 0.650653  |
| H | -1.439204 | 1.791476  | -0.73388  |
| H | -3.039533 | -0.428588 | 2.596038  |
| O | 0.507314  | 0.197495  | -1.203794 |
| H | 1.3821    | -0.116805 | -0.912158 |
| O | -1.177993 | -2.322644 | 2.498041  |
| H | -1.910706 | -2.304371 | 3.128722  |
| C | 0.775825  | -2.164149 | 0.444199  |
| C | 2.159314  | -1.583248 | 0.625437  |
| H | 0.664043  | -2.600268 | -0.554031 |
| H | 0.623434  | -2.975015 | 1.162376  |
| C | 3.190877  | -1.585601 | -0.238325 |
| H | 2.302693  | -1.07392  | 1.578545  |
| C | 4.476738  | -0.875776 | 0.126192  |
| H | 4.41458   | -0.530274 | 1.162651  |
| H | 5.317595  | -1.581455 | 0.07222   |
| C | 4.802219  | 0.339251  | -0.7885   |
| C | 3.636546  | 1.284801  | -0.971975 |
| H | 5.123978  | -0.024151 | -1.770067 |
| H | 5.667866  | 0.857318  | -0.358166 |
| C | 3.142344  | 2.137258  | -0.060027 |
| H | 3.122564  | 1.224773  | -1.931326 |
| C | 1.917976  | 2.972031  | -0.342067 |
| H | 1.117202  | 2.732967  | 0.369568  |
| H | 2.136812  | 4.041558  | -0.225547 |
| H | 1.526598  | 2.798112  | -1.346582 |
| C | 3.168686  | -2.225551 | -1.605517 |
| H | 3.252595  | -1.465721 | -2.39255  |
| H | 2.264629  | -2.805127 | -1.798008 |
| H | 4.030674  | -2.892853 | -1.724113 |
| C | 3.726424  | 2.317865  | 1.319405  |
| H | 3.855298  | 3.382856  | 1.548822  |
| H | 4.692028  | 1.824029  | 1.446279  |
| H | 3.041564  | 1.916322  | 2.078101  |
| C | -3.551574 | 1.752822  | 1.040337  |
| H | -3.30328  | 2.682568  | 0.515003  |
| H | -3.720538 | 2.018248  | 2.09139   |

|                |         |         |         |
|----------------|---------|---------|---------|
| Frequencies -- | 19.1566 | 21.5965 | 25.9830 |
| Frequencies -- | 36.9239 | 46.7935 | 54.4929 |
| Frequencies -- | 66.4168 | 76.4720 | 90.3475 |

Zero-point correction= 0.487875 (Hartree/Particle)  
 Thermal correction to Energy= 0.514110  
 Thermal correction to Enthalpy= 0.515054  
 Thermal correction to Gibbs Free Energy= 0.429778  
 Sum of electronic and zero-point Energies= -969.568174  
 Sum of electronic and thermal Energies= -969.541939  
 Sum of electronic and thermal Enthalpies= -969.540995  
 Sum of electronic and thermal Free Energies= -969.626271

ss-cbg-o2.log

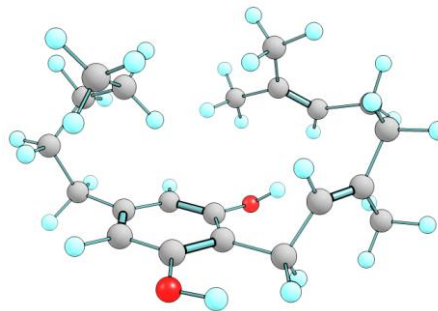

55 Atoms

|   |           |           |           |
|---|-----------|-----------|-----------|
| C | -0.223484 | -0.990598 | -1.232419 |
| C | -1.439336 | -0.459401 | -1.661889 |
| C | -2.625298 | -0.798987 | -1.004992 |
| C | -2.574478 | -1.705654 | 0.056245  |
| C | -1.354374 | -2.244266 | 0.475356  |
| C | -0.148063 | -1.90811  | -0.167105 |
| H | -1.433636 | 0.261134  | -2.472661 |
| H | -3.473576 | -1.982991 | 0.597427  |
| O | 0.911659  | -0.602852 | -1.90482  |
| H | 1.610937  | -0.420252 | -1.252356 |
| O | -1.418371 | -3.113352 | 1.532357  |
| H | -0.52853  | -3.372742 | 1.804644  |
| C | 1.206946  | -2.461258 | 0.238459  |
| C | 2.068059  | -1.378919 | 0.848833  |
| H | 1.686481  | -2.895876 | -0.643583 |
| H | 1.098652  | -3.292141 | 0.948507  |
| C | 3.294051  | -0.975968 | 0.472076  |
| H | 1.58377   | -0.835286 | 1.659851  |
| C | 3.927221  | 0.217695  | 1.151312  |
| H | 3.28937   | 0.536463  | 1.981101  |
| H | 4.895849  | -0.069099 | 1.583618  |
| C | 4.163081  | 1.425267  | 0.198589  |
| C | 2.983406  | 1.770093  | -0.684382 |
| H | 5.026789  | 1.212681  | -0.439556 |
| H | 4.450131  | 2.28373   | 0.818634  |
| C | 1.815811  | 2.311962  | -0.301295 |
| H | 3.097184  | 1.52948   | -1.741531 |
| C | 0.709003  | 2.582162  | -1.290126 |
| H | -0.207404 | 2.05661   | -0.99925  |
| H | 0.464889  | 3.652501  | -1.314264 |
| C | 0.972248  | 2.258928  | -2.299811 |
| C | 4.108176  | -1.605522 | -0.63209  |
| H | 4.256036  | -0.90133  | -1.460191 |
| H | 3.658169  | -2.511546 | -1.040703 |
| H | 5.107518  | -1.862953 | -0.2613   |
| C | 1.491468  | 2.682524  | 1.124753  |
| H | 1.050709  | 3.685758  | 1.173452  |
| H | 2.362076  | 2.660906  | 1.78352   |
| H | 0.740567  | 1.993633  | 1.53312   |
| C | -3.926065 | -0.114865 | -1.361436 |
| H | -4.696708 | -0.870634 | -1.561239 |
| H | -3.794669 | 0.452643  | -2.290227 |
| C | -4.45751  | 0.835841  | -0.265096 |
| H | -4.693306 | 0.25456   | 0.633838  |
| H | -5.414689 | 1.237381  | -0.620678 |
| C | -3.539103 | 2.019935  | 0.099902  |
| H | -3.157903 | 2.470109  | -0.827349 |
| H | -4.158299 | 2.791664  | 0.577615  |
| C | -2.351006 | 1.728794  | 1.038508  |
| H | -1.801013 | 2.668239  | 1.181278  |
| H | -1.651113 | 1.036289  | 0.56333   |
| C | -2.751092 | 1.172402  | 2.408683  |
| H | -3.192902 | 0.17481   | 2.322425  |
| H | -1.877615 | 1.085882  | 3.064086  |
| H | -3.480771 | 1.822332  | 2.90664   |

|                |         |         |          |
|----------------|---------|---------|----------|
| Frequencies -- | 24.8953 | 33.7288 | 37.9852  |
| Frequencies -- | 44.3797 | 59.3109 | 64.8072  |
| Frequencies -- | 68.7141 | 75.8105 | 103.9804 |

Zero-point correction= 0.488213 (Hartree/Particle)  
 Thermal correction to Energy= 0.514144  
 Thermal correction to Enthalpy= 0.515088  
 Thermal correction to Gibbs Free Energy= 0.432242  
 Sum of electronic and zero-point Energies= -969.567888  
 Sum of electronic and thermal Energies= -969.541956  
 Sum of electronic and thermal Enthalpies= -969.541012  
 Sum of electronic and thermal Free Energies= -969.623858

ss-cbg-o.log

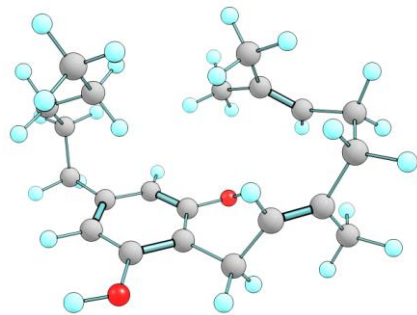

55 Atoms

|   |           |           |           |
|---|-----------|-----------|-----------|
| C | 0.236699  | 1.09175   | -1.184398 |
| C | 1.46023   | 0.611551  | -1.651801 |
| C | 2.642623  | 0.925825  | -0.975568 |
| C | 2.581133  | 1.757084  | 0.146212  |
| C | 1.350682  | 2.247736  | 0.598837  |
| C | 0.151425  | 1.931384  | -0.058164 |
| H | 1.466006  | -0.050625 | -2.51129  |
| H | 3.489052  | 2.002751  | 0.691566  |
| O | -0.893588 | 0.733348  | -1.878209 |
| H | -1.599235 | 0.537349  | -1.236453 |
| O | 1.267144  | 3.059316  | 1.70042   |
| H | 2.156034  | 3.215379  | 2.047793  |
| C | -1.193741 | 2.44946   | 0.416977  |
| C | -2.057786 | 1.31539   | 0.918148  |
| H | -1.683831 | 2.984542  | -0.402715 |
| C | -1.030376 | 3.173314  | 1.220554  |
| H | -3.276677 | 0.934535  | 0.496672  |
| H | -1.58308  | 0.712875  | 1.692854  |
| C | -3.915632 | -0.304419 | 1.084218  |
| H | -3.291832 | -0.672238 | 1.904176  |
| H | -4.893879 | -0.050728 | 1.51603   |
| C | -4.127779 | -1.450368 | 0.053121  |
| C | -2.928858 | -1.733839 | -0.825894 |
| H | -4.979752 | -1.200863 | -0.587657 |
| H | -4.423137 | -2.347432 | 0.612013  |
| C | -1.757466 | -2.271101 | -0.448802 |
| H | -3.028292 | -1.440884 | -1.871113 |
| C | -0.624745 | -2.462848 | -1.426091 |
| H | 0.267334  | -1.920484 | -1.092814 |
| H | -0.34452  | -3.522549 | -1.492384 |
| H | -0.878835 | -2.103293 | -2.425815 |
| C | -4.079517 | 1.637235  | -0.57146  |
| H | -4.222458 | 0.987583  | -1.443984 |
| H | -3.620494 | 2.564517  | -0.917697 |
| H | -5.08139  | 1.875811  | -0.194559 |
| C | -1.449252 | -2.701965 | 0.963864  |
| H | -0.964438 | -3.685673 | 0.973702  |
| H | -2.334509 | -2.752099 | 1.601449  |
| H | -0.740842 | -2.001136 | 1.424894  |
| C | 3.943048  | 0.269458  | -1.377231 |
| H | 4.782662  | 0.81413   | -0.929377 |
| H | 4.069171  | 0.329471  | -2.465274 |
| C | 4.032839  | -1.215811 | -0.952576 |
| H | 5.006496  | -1.593524 | -1.28765  |
| H | 3.275683  | -1.792732 | -1.499484 |
| C | 3.873732  | -1.466675 | 0.561505  |
| H | 4.474438  | -2.340439 | 0.847024  |
| H | 4.296714  | -0.6174   | 1.116701  |
| C | 2.42968   | -1.708082 | 1.030096  |
| H | 2.039359  | -2.6022   | 0.525526  |
| H | 1.789599  | -0.877779 | 0.716889  |
| C | 2.325485  | -1.886059 | 2.546941  |
| H | 2.661906  | -0.982783 | 3.069424  |
| H | 1.294418  | -2.085673 | 2.857942  |
| H | 2.946851  | -2.719951 | 2.894411  |
| H | -3.480771 | 1.822332  | 2.90664   |

Frequencies -- 23.1074 37.0585 40.8768  
 Frequencies -- 51.9819 61.6170 68.4963  
 Frequencies -- 74.4033 90.8889 96.6143

Zero-point correction= 0.488554 (Hartree/Particle)  
 Thermal correction to Energy= 0.514414  
 Thermal correction to Enthalpy= 0.515358  
 Thermal correction to Gibbs Free Energy= 0.432915  
 Sum of electronic and zero-point Energies= -969.570375  
 Sum of electronic and thermal Energies= -969.544515  
 Sum of electronic and thermal Enthalpies= -969.543571  
 Sum of electronic and thermal Free Energies= -969.626014

ss-cbg-e2.log

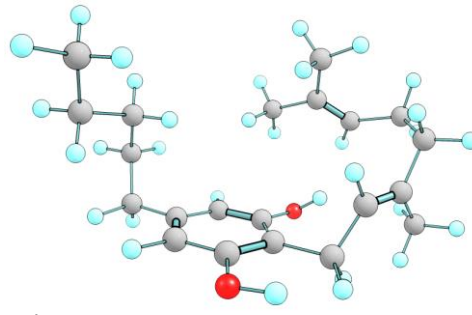

55 Atoms

|   |           |           |           |
|---|-----------|-----------|-----------|
| C | 0.08208   | -1.116477 | -1.159572 |
| C | -1.15403  | -0.743352 | -1.680094 |
| C | -2.334607 | -1.114654 | -1.025354 |
| C | -2.245659 | -1.868569 | 0.145093  |
| C | -0.999435 | -2.257354 | 0.653596  |
| C | 0.195067  | -1.90633  | 0.003114  |
| H | -1.175678 | -0.13133  | -2.575486 |
| H | -3.137715 | -2.161064 | 0.689662  |
| O | 1.206168  | -0.710439 | -1.839079 |
| H | 1.875769  | -0.440121 | -1.186807 |
| O | -1.033813 | -3.002023 | 1.80333   |
| H | -0.13706  | -3.149594 | 2.131154  |
| C | 1.573745  | -2.32447  | 0.486014  |
| C | 2.357233  | -1.137476 | 0.998096  |
| C | 2.098121  | -2.817251 | -0.338253 |
| H | 1.499125  | -3.084362 | 1.275206  |
| C | 3.552483  | -0.682285 | 0.582571  |
| H | 1.835592  | -0.562362 | 1.762841  |
| C | 4.097343  | 0.608008  | 1.153907  |
| H | 3.475107  | 0.915808  | 1.999475  |
| H | 5.111357  | 0.44614   | 1.544299  |
| C | 4.154625  | 1.77222   | 0.121586  |
| C | 2.888443  | 1.943177  | -0.68868  |
| H | 4.991531  | 1.603438  | -0.563817 |
| H | 4.395657  | 2.689922  | 0.672306  |
| C | 1.703109  | 2.394608  | -0.24832  |
| H | 2.946694  | 1.628458  | -1.73061  |
| C | 0.496363  | 2.457338  | -1.15121  |
| H | -0.320841 | 1.847972  | -0.745695 |
| H | 0.117222  | 3.484834  | -1.227305 |
| H | 0.715256  | 2.086988  | -2.155337 |
| C | 4.408159  | -1.33915  | -0.473418 |
| H | 4.524438  | -0.683949 | -1.34572  |
| H | 4.010899  | -2.293215 | -0.823348 |
| H | 5.41703   | -1.516409 | -0.082155 |
| C | 1.453365  | 2.848758  | 1.168334  |
| H | 0.926823  | 3.811011  | 1.179425  |
| H | 2.36864   | 2.955867  | 1.754112  |
| H | 0.803091  | 2.13183   | 1.687253  |
| C | -3.67183  | -0.624551 | -1.537199 |
| H | -4.477802 | -1.110587 | -0.977893 |
| H | -3.797788 | -0.921024 | -2.58605  |
| C | -3.820055 | 0.911886  | -1.444553 |
| H | -4.824264 | 1.186097  | -1.793942 |
| H | -3.112633 | 1.375998  | -2.142866 |
| C | -3.585025 | 1.496334  | -0.044139 |
| H | -2.561941 | 1.26025   | 0.277931  |
| H | -3.641156 | 2.591536  | -0.106588 |
| C | -4.568695 | 1.008115  | 1.025839  |
| H | -4.489093 | -0.080503 | 1.130987  |
| H | -5.596443 | 1.211035  | 0.694266  |
| C | -4.32423  | 1.662     | 2.389121  |
| H | -4.424453 | 2.751912  | 2.327811  |
| H | -5.032627 | 1.302206  | 3.142664  |
| H | -3.31237  | 1.443514  | 2.750082  |
| H | -3.480771 | 1.822332  | 2.90664   |

Frequencies -- 17.1448 23.8720 29.4323  
 Frequencies -- 39.3377 44.0112 50.3915  
 Frequencies -- 62.4471 92.4218 97.6149

Zero-point correction= 0.487867 (Hartree/Particle)  
 Thermal correction to Energy= 0.514061  
 Thermal correction to Enthalpy= 0.515005  
 Thermal correction to Gibbs Free Energy= 0.430012  
 Sum of electronic and zero-point Energies= -969.568610  
 Sum of electronic and thermal Energies= -969.542416  
 Sum of electronic and thermal Enthalpies= -969.541472  
 Sum of electronic and thermal Free Energies= -969.626465

ss-cbg-e1.log

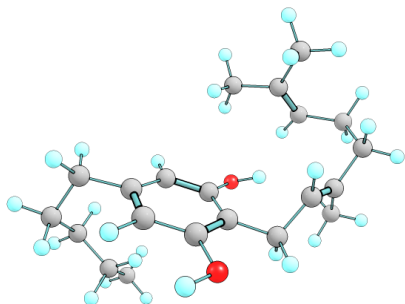

55 Atoms

|   |           |           |           |
|---|-----------|-----------|-----------|
| C | 0.393817  | -0.003913 | -0.188549 |
| C | 1.415213  | -0.949052 | -0.051109 |
| C | 2.386257  | -0.795481 | 0.940259  |
| C | 2.298322  | 0.296714  | 1.810791  |
| C | 1.274973  | 1.23762   | 1.665165  |
| C | 0.308726  | 1.120777  | 0.650684  |
| H | 1.439025  | -1.791615 | -0.734121 |
| H | 3.039473  | 0.427922  | 2.596142  |
| O | -0.507274 | -0.197395 | -1.203923 |
| H | -1.382124 | 0.116572  | -0.91214  |
| O | 1.178101  | 2.322143  | 2.4983    |
| H | 1.910806  | 2.303756  | 3.128987  |
| C | -0.775519 | 2.164197  | 0.444232  |
| C | -2.159087 | 1.583588  | 0.625763  |
| H | -0.663781 | 2.600124  | -0.554085 |
| H | -0.622857 | 2.97513   | 1.162272  |
| C | -3.190565 | 1.585515  | -0.238091 |
| H | -2.302551 | 1.074804  | 1.579149  |
| C | -4.476463 | 0.875895  | 0.126629  |
| H | -4.414205 | 0.530374  | 1.163072  |
| H | -5.317235 | 1.581687  | 0.072765  |
| C | -4.8022   | -0.339078 | -0.788059 |
| C | -3.636549 | -1.284593 | -0.971933 |
| H | -5.124202 | 0.024414  | -1.769511 |
| H | -5.667721 | -0.857183 | -0.357525 |
| C | -3.141924 | -2.136952 | -0.06012  |
| H | -3.122944 | -1.224601 | -1.931491 |
| C | -1.917657 | -2.971724 | -0.342593 |
| H | -1.116696 | -2.732827 | 0.368886  |
| H | -2.136546 | -4.041253 | -0.226207 |
| H | -1.526512 | -2.797639 | -1.347167 |
| C | -3.168109 | 2.224498  | -1.605748 |
| H | -3.249444 | 1.463853  | -2.392284 |
| H | -2.265034 | 2.805809  | -1.797602 |
| H | -4.031352 | 2.889874  | -1.725928 |
| C | -3.72544  | -2.317508 | 1.319559  |
| H | -3.85431  | -3.382489 | 1.549029  |
| H | -4.69094  | -1.823584 | 1.446865  |
| H | -3.040206 | -1.916036 | 2.077954  |
| C | 3.55157   | -1.753147 | 1.040006  |
| H | 3.303287  | -2.682843 | 0.514585  |
| H | 3.720813  | -2.018702 | 2.090985  |
| C | 4.870776  | -1.19434  | 0.457388  |
| H | 5.641487  | -1.961378 | 0.601105  |
| H | 5.188103  | -0.326296 | 1.050268  |
| C | 4.802929  | -0.802994 | -1.032569 |
| H | 5.788192  | -0.958945 | -1.491981 |
| H | 4.116345  | -1.484485 | -1.554816 |
| C | 4.375721  | 0.648263  | -1.300423 |
| H | 5.102853  | 1.322816  | -0.827534 |
| H | 3.413366  | 0.848942  | -0.819975 |
| C | 4.274697  | 0.9636    | -2.795294 |
| H | 3.519297  | 0.331499  | -3.276844 |
| H | 3.993548  | 2.007919  | -2.967891 |
| H | 5.228525  | 0.785071  | -3.305899 |
| H | -3.480771 | 1.822332  | 2.90664   |

Frequencies -- 19.2087 21.6596 26.0368  
 Frequencies -- 37.0431 46.9182 55.2063  
 Frequencies -- 66.8094 76.6023 90.45017  
 Zero-point correction= 0.487884 (Hartree/Particle)  
 Thermal correction to Energy= 0.514112  
 Thermal correction to Enthalpy= 0.515057  
 Thermal correction to Gibbs Free Energy= 0.429825  
 Sum of electronic and zero-point Energies= -969.568165  
 Sum of electronic and thermal Energies= -969.541936  
 Sum of electronic and thermal Enthalpies= -969.540992  
 Sum of electronic and thermal Free Energies= -969.626224

aa-CBG-u.log

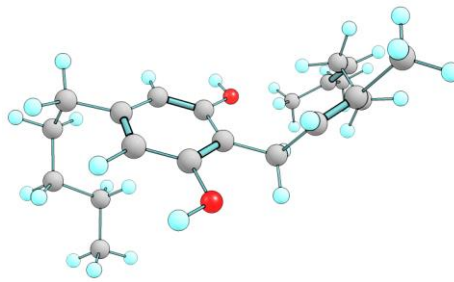

55 Atoms

|   |           |           |           |
|---|-----------|-----------|-----------|
| C | 0.5853    | -0.21771  | 0.582761  |
| C | 1.710403  | -0.546905 | 1.343666  |
| C | 2.870323  | 0.229589  | 1.25759   |
| C | 2.874409  | 1.3474    | 0.419832  |
| C | 1.739348  | 1.664325  | -0.335498 |
| C | 0.574617  | 0.884089  | -0.286781 |
| H | 1.685331  | -1.420543 | 1.990827  |
| H | 3.764413  | 1.966488  | 0.339491  |
| O | -0.563156 | -0.964402 | 0.649388  |
| H | -0.437378 | -1.698691 | 1.265717  |
| O | 1.708585  | 2.756835  | -1.162534 |
| H | 2.561796  | 3.210256  | -1.122674 |
| C | -0.649199 | 1.255426  | -1.101754 |
| C | -1.473476 | 2.320395  | -0.412175 |
| H | -1.241113 | 0.359012  | -1.291376 |
| H | -0.310357 | 1.636415  | -2.073499 |
| C | -2.78569  | 2.29318   | -0.135271 |
| H | -0.900876 | 3.197258  | -0.109812 |
| C | -3.706162 | 1.141608  | -0.485223 |
| H | -4.689111 | 1.5417    | -0.768206 |
| H | -3.340713 | 0.585971  | -1.354093 |
| C | -3.892915 | 0.140346  | 0.685342  |
| C | -4.937939 | -0.900882 | 0.379991  |
| H | -4.194844 | 0.696961  | 1.582053  |
| H | -2.92148  | -0.308389 | 0.907113  |
| C | -4.743313 | -2.142452 | -0.091854 |
| H | -5.969183 | -0.575432 | 0.52698   |
| C | -5.906881 | -3.063561 | -0.371784 |
| H | -5.921441 | -3.368423 | -1.426769 |
| H | -5.823705 | -3.988865 | 0.214157  |
| H | -6.868715 | -2.597977 | -0.137917 |
| C | -3.448441 | 3.440417  | 0.591335  |
| H | -4.222806 | 3.904321  | -0.033853 |
| H | -2.731997 | 4.215057  | 0.879476  |
| H | -3.954894 | 3.092326  | 1.500893  |
| C | -3.389536 | -2.740026 | -0.390167 |
| H | -3.217531 | -3.633624 | 0.225237  |
| H | -2.561846 | -2.048723 | -0.227426 |
| C | -3.347773 | -3.076791 | -1.43448  |
| H | 4.118403  | -0.182451 | 2.004455  |
| H | 3.859119  | -0.433483 | 3.040501  |
| C | 4.811752  | 0.665707  | 2.049306  |
| H | 4.853668  | -1.389717 | 1.378023  |
| H | 5.720958  | -1.607537 | 2.013144  |
| C | 4.205649  | -2.274488 | 1.431385  |
| H | 5.320865  | -1.180631 | -0.07639  |
| H | 6.233639  | -1.766529 | -0.248297 |
| H | 5.608414  | -0.128819 | -0.217293 |
| C | 4.294095  | -1.573047 | -1.149826 |
| H | 4.05853   | -2.640484 | -1.038563 |
| H | 3.356554  | -1.033587 | -0.98592  |
| C | 4.797839  | -1.300764 | -2.569821 |
| H | 5.732227  | -1.838202 | -2.771138 |
| H | 4.065319  | -1.610125 | -3.322853 |
| H | 4.994333  | -0.231988 | -2.715659 |
| H | -3.480771 | 1.822332  | 2.90664   |

Frequencies -- 12.9313 22.1781 28.3680  
 Frequencies -- 31.3991 42.9823 44.3487  
 Frequencies -- 59.1177 74.7947 80.7858

Zero-point correction= 0.487959 (Hartree/Particle)  
 Thermal correction to Energy= 0.514343  
 Thermal correction to Enthalpy= 0.515287  
 Thermal correction to Gibbs Free Energy= 0.428735  
 Sum of electronic and zero-point Energies= -969.564628  
 Sum of electronic and thermal Energies= -969.538244  
 Sum of electronic and thermal Enthalpies= -969.537300  
 Sum of electronic and thermal Free Energies= -969.623852

aa-cbg-o.log

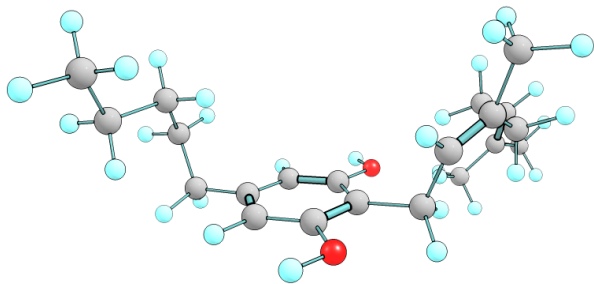

55 Atoms

|   |           |           |           |
|---|-----------|-----------|-----------|
| C | 0.269543  | -0.989063 | -0.553793 |
| C | 1.413162  | -1.7499   | -0.294285 |
| C | 2.671331  | -1.292349 | -0.700207 |
| C | 2.760454  | -0.067782 | -1.367256 |
| C | 1.606054  | 0.682821  | -1.619038 |
| C | 0.333463  | 0.237807  | -1.232179 |
| H | 1.321019  | -2.69933  | 0.228302  |
| H | 3.727438  | 0.309439  | -1.690327 |
| O | -0.974266 | -1.414615 | -0.162616 |
| H | -0.900144 | -2.265942 | 0.289449  |
| O | 1.661717  | 1.894157  | -2.258282 |
| H | 2.580809  | 2.094099  | -2.483179 |
| C | -0.902401 | 1.073629  | -1.50258  |
| C | -1.098468 | 2.132703  | -0.440099 |
| H | -1.772282 | 0.419011  | -1.571193 |
| H | -0.779696 | 1.560655  | -2.478172 |
| C | -2.203255 | 2.37687   | 0.280562  |
| H | -0.215606 | 2.745081  | -0.256064 |
| C | -3.498115 | 1.602714  | 0.138741  |
| H | -4.344022 | 2.291257  | 0.267989  |
| H | -3.601929 | 1.176487  | -0.863634 |
| C | -3.630878 | 0.44993   | 1.168655  |
| C | -4.983446 | -0.21214  | 1.105869  |
| H | -3.476338 | 0.854902  | 2.176886  |
| H | -2.820045 | -0.260698 | 0.988619  |
| C | -5.327435 | -1.300446 | 0.399046  |
| H | -5.771463 | 0.290794  | 1.668798  |
| C | -6.742621 | -1.827214 | 0.413318  |
| H | -7.167178 | -1.838852 | -0.599522 |
| H | -6.770556 | -2.865634 | 0.770028  |
| H | -7.400033 | -1.229916 | 1.05177   |
| C | -2.219142 | 3.460755  | 1.333143  |
| H | -2.962525 | 4.23169   | 1.09071   |
| H | -1.244945 | 3.946662  | 1.439738  |
| H | -2.504155 | 3.055981  | 2.312944  |
| C | -4.376416 | -2.090813 | -0.466533 |
| H | -4.325454 | -3.135388 | -0.130369 |
| H | -3.363159 | -1.687879 | -0.483119 |
| H | -4.744935 | -2.121632 | -1.500585 |
| C | 3.911982  | -2.093184 | -0.370412 |
| H | 4.738584  | -1.773679 | -1.013535 |
| H | 3.733188  | -3.151273 | -0.596343 |
| C | 4.326966  | -1.97711  | 1.114293  |
| H | 3.51624   | -2.3825   | 1.73254   |
| H | 5.199462  | -2.622409 | 1.282319  |
| C | 4.64906   | -0.551313 | 1.584908  |
| H | 4.822796  | -0.571394 | 2.669243  |
| H | 3.772499  | 0.090824  | 1.426554  |
| C | 5.866955  | 0.083892  | 0.902749  |
| H | 6.738987  | -0.570775 | 1.037759  |
| H | 5.698287  | 0.146803  | -0.179271 |
| C | 6.180446  | 1.48252   | 1.442631  |
| H | 6.386138  | 1.452653  | 2.518914  |
| H | 7.053187  | 1.920451  | 0.946997  |
| H | 5.332788  | 2.160214  | 1.287743  |
| H | -3.480771 | 1.822332  | 2.90664   |

Frequencies -- 11.4967 21.2697 27.3358  
 Frequencies -- 36.3500 38.0083 46.3954  
 Frequencies -- 58.8437 84.6576 91.1080

Zero-point correction= 0.488062 (Hartree/Particle)  
 Thermal correction to Energy= 0.514396  
 Thermal correction to Enthalpy= 0.515340  
 Thermal correction to Gibbs Free Energy= 0.428942  
 Sum of electronic and zero-point Energies= -969.566120  
 Sum of electronic and thermal Energies= -969.539787  
 Sum of electronic and thermal Enthalpies= -969.538842  
 Sum of electronic and thermal Free Energies= -969.625240

aa-cbg-e2

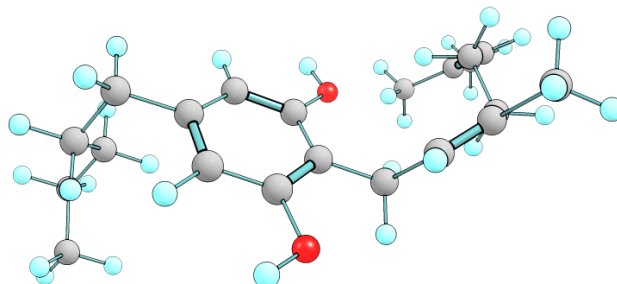

55 Atoms

|   |           |           |           |
|---|-----------|-----------|-----------|
| C | -0.45987  | -0.126175 | -0.416231 |
| C | -1.619281 | -0.388973 | -1.156015 |
| C | -2.705491 | 0.486944  | -1.097074 |
| C | -2.611007 | 1.627018  | -0.291245 |
| C | -1.447739 | 1.874471  | 0.442447  |
| C | -0.347653 | 1.001588  | 0.407691  |
| H | -1.670688 | -1.280979 | -1.775336 |
| H | -3.443061 | 2.324906  | -0.235142 |
| O | 0.618879  | -0.972194 | -0.463198 |
| H | 0.427203  | -1.709879 | -1.058128 |
| O | -1.316167 | 2.986821  | 1.2328    |
| H | -2.132697 | 3.503683  | 1.194221  |
| C | 0.913005  | 1.304461  | 1.194184  |
| C | 1.789123  | 2.303916  | 0.471409  |
| H | 1.449782  | 0.374609  | 1.386333  |
| H | 0.618999  | 1.72161   | 2.165828  |
| C | 3.085459  | 2.179668  | 0.149821  |
| H | 1.271321  | 3.218256  | 0.18159   |
| C | 3.932697  | 0.966636  | 0.475895  |
| H | 4.950832  | 1.296692  | 0.722371  |
| H | 3.558752  | 0.441987  | 1.360325  |
| C | 4.008267  | -0.05044  | -0.69367  |
| H | 4.998319  | -1.154248 | -0.424823 |
| C | 4.306622  | 0.481392  | -1.606327 |
| H | 3.002326  | -0.439097 | -0.872056 |
| C | 4.74894   | -2.370488 | 0.08565   |
| H | 6.038602  | -0.902928 | -0.638329 |
| C | 5.861964  | -3.364364 | 0.317849  |
| H | 5.916357  | -3.652908 | 1.376095  |
| H | 5.683037  | -4.290786 | -0.244415 |
| H | 6.837986  | -2.969376 | 0.021245  |
| C | 3.802785  | 3.27234   | -0.60866  |
| H | 4.634692  | 3.677799  | -0.017734 |
| H | 3.135404  | 4.098115  | -0.871531 |
| H | 4.24419   | 2.885764  | -1.536491 |
| C | 3.377738  | -2.866331 | 0.475978  |
| H | 3.105658  | -3.754394 | -0.110774 |
| H | 2.59265   | -2.119928 | 0.350131  |
| H | 3.376643  | -3.183909 | 1.527096  |
| C | -3.986401 | 0.195822  | -1.849497 |
| H | -3.794569 | -0.550671 | -2.629359 |
| H | -4.322392 | 1.107021  | -2.359191 |
| C | -5.122574 | -0.307226 | -0.933362 |
| H | -5.317887 | 0.454834  | -0.169281 |
| H | -6.041684 | -0.394869 | -1.528063 |
| C | -4.819984 | -1.655521 | -0.269206 |
| H | -3.908153 | -1.566017 | 0.335734  |
| H | -4.593492 | -2.389982 | -1.054464 |
| C | -5.959575 | -2.193529 | 0.609797  |
| H | -6.874216 | -2.277932 | 0.006696  |
| H | -5.708084 | -3.213797 | 0.926558  |
| C | -6.242726 | -1.341856 | 1.853108  |
| H | -5.339034 | -1.231415 | 2.464112  |
| H | -6.587024 | -0.337026 | 1.588354  |
| H | -7.015752 | -1.80007  | 2.478812  |
| H | -3.480771 | 1.822332  | 2.90664   |

Frequencies -- 13.9572 19.7326 25.8665  
 Frequencies -- 32.1724 45.2049 46.5936  
 Frequencies -- 61.8014 67.3019 84.1439

Zero-point correction= 0.488187 (Hartree/Particle)  
 Thermal correction to Energy= 0.514483  
 Thermal correction to Enthalpy= 0.515427  
 Thermal correction to Gibbs Free Energy= 0.429090  
 Sum of electronic and zero-point Energies= -969.565310  
 Sum of electronic and thermal Energies= -969.539014  
 Sum of electronic and thermal Enthalpies= -969.538070  
 Sum of electronic and thermal Free Energies= -969.624407

aa-cbg-e1.log

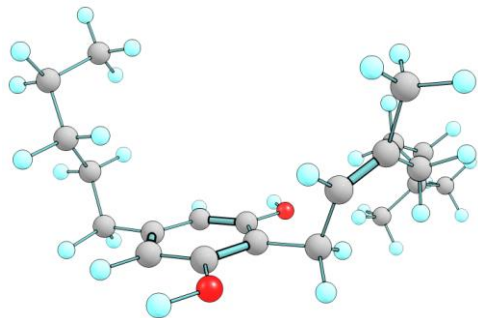

55 Atoms

|   |           |           |           |
|---|-----------|-----------|-----------|
| C | 0.406477  | -0.366333 | -1.136755 |
| C | 1.626957  | -1.034009 | -1.274516 |
| C | 2.810421  | -0.31034  | -1.4555   |
| C | 2.748026  | 1.084644  | -1.499162 |
| C | 1.518534  | 1.738531  | -1.358752 |
| C | 0.318622  | 1.033374  | -1.184109 |
| H | 1.653649  | -2.120468 | -1.236362 |
| H | 3.65594   | 1.66741   | -1.633646 |
| O | -0.766537 | -1.054596 | -0.957778 |
| H | -0.588591 | -2.004922 | -0.948997 |
| O | 1.424797  | 3.105938  | -1.38267  |
| H | 2.30479   | 3.483505  | -1.517843 |
| C | -0.997527 | 1.766069  | -1.009814 |
| C | -1.181964 | 2.235172  | 0.417076  |
| H | -1.816277 | 1.115923  | -1.321044 |
| H | -0.9971   | 2.636845  | -1.677823 |
| C | -2.232956 | 2.021317  | 1.222487  |
| H | -0.337197 | 2.800812  | 0.81013   |
| C | -3.471275 | 1.249031  | 0.81646   |
| H | -4.351486 | 1.711374  | 1.283093  |
| H | -3.637223 | 1.297999  | -0.264019 |
| C | -3.415682 | -0.24558  | 1.229657  |
| C | -4.718268 | -0.95454  | 0.964216  |
| H | -3.186329 | -0.308521 | 2.301322  |
| H | -2.580464 | -0.713692 | 0.70242   |
| C | -5.047246 | -1.686775 | -0.111703 |
| H | -5.485825 | -0.80891  | 1.726223  |
| C | -6.415206 | -2.31318  | -0.242075 |
| H | -6.929155 | -1.948835 | -1.141647 |
| H | -6.33821  | -3.403257 | -0.352322 |
| C | -7.050756 | -2.102459 | 0.622989  |
| C | -2.238122 | 2.535035  | 2.643416  |
| H | -3.056454 | 3.250546  | 2.798761  |
| H | -1.29804  | 3.028086  | 2.907218  |
| H | -2.403839 | 1.718259  | 3.357905  |
| C | -4.124767 | -1.955508 | -1.275954 |
| H | -3.945821 | -3.033793 | -1.386219 |
| H | -3.158811 | -1.456228 | -1.192097 |
| H | -4.594575 | -1.627562 | -2.212701 |
| C | 4.135545  | -1.035854 | -1.550972 |
| H | 4.890746  | -0.367204 | -1.981006 |
| H | 4.035637  | -1.884903 | -2.237911 |
| C | 4.637354  | -1.557374 | -0.187448 |
| H | 3.885055  | -2.241915 | 0.222546  |
| H | 5.545118  | -2.153392 | -0.351046 |
| C | 4.939865  | -0.441671 | 0.819677  |
| H | 4.027213  | 0.1408    | 1.001535  |
| H | 5.65917   | 0.254208  | 0.365883  |
| C | 5.499626  | -0.939178 | 2.161097  |
| H | 6.413976  | -1.520916 | 1.979147  |
| H | 5.804711  | -0.070821 | 2.758939  |
| C | 4.510664  | -1.782029 | 2.975491  |
| H | 4.24475   | -2.709296 | 2.457951  |
| H | 4.932169  | -2.057146 | 3.947954  |
| H | 3.582688  | -1.227068 | 3.157343  |
| H | -3.480771 | 1.822332  | 2.90664   |

|                                              |                             |         |         |
|----------------------------------------------|-----------------------------|---------|---------|
| Frequencies --                               | 7.2002                      | 19.3532 | 23.4501 |
| Frequencies --                               | 28.2288                     | 41.7405 | 43.3510 |
| Frequencies --                               | 54.7824                     | 67.5545 | 78.5854 |
| Zero-point correction=                       | 0.487744 (Hartree/Particle) |         |         |
| Thermal correction to Energy=                | 0.514211                    |         |         |
| Thermal correction to Enthalpy=              | 0.515155                    |         |         |
| Thermal correction to Gibbs Free Energy=     | 0.427437                    |         |         |
| Sum of electronic and zero-point Energies=   | -969.565741                 |         |         |
| Sum of electronic and thermal Energies=      | -969.539274                 |         |         |
| Sum of electronic and thermal Enthalpies=    | -969.538330                 |         |         |
| Sum of electronic and thermal Free Energies= | -969.626048                 |         |         |

CBG-V  
aa-cbgv-e.log

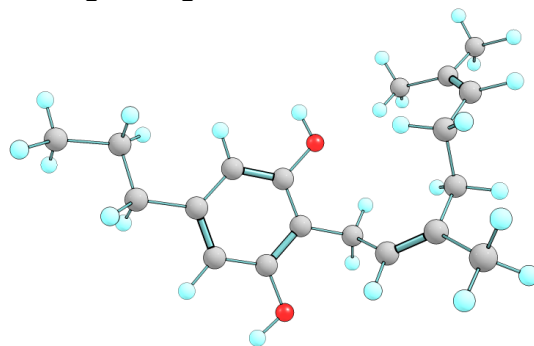

49 Atoms

|   |           |           |           |
|---|-----------|-----------|-----------|
| C | 1.036865  | -0.336597 | -0.33972  |
| C | 2.284899  | -0.867975 | 0.0136    |
| C | 3.429451  | -0.069487 | -0.036154 |
| C | 3.298801  | 1.263379  | -0.447631 |
| C | 2.048173  | 1.777673  | -0.794403 |
| C | 0.885019  | 0.989985  | -0.759106 |
| H | 2.342546  | -1.905828 | 0.325656  |
| H | 4.175374  | 1.905907  | -0.493945 |
| O | -0.097853 | -1.1071   | -0.293084 |
| H | 0.125715  | -1.998412 | 0.007195  |
| O | 1.88705   | 3.08098   | -1.188506 |
| H | 2.746942  | 3.523499  | -1.185896 |
| C | -0.466811 | 1.578552  | -1.114833 |
| C | -1.050549 | 2.354249  | 0.045324  |
| H | -1.136382 | 0.77868   | -1.433894 |
| H | -0.332966 | 2.255379  | -1.968334 |
| C | -2.250453 | 2.194331  | 0.623087  |
| H | -0.384201 | 3.118634  | 0.445068  |
| C | -3.278298 | 1.170075  | 0.187749  |
| H | -4.281806 | 1.604318  | 0.291726  |
| H | -3.165477 | 0.911374  | -0.869464 |
| C | -3.215359 | -0.141344 | 1.014697  |
| C | -4.363831 | -1.065203 | 0.699533  |
| H | -3.242244 | 0.11093   | 2.082378  |
| H | -2.247725 | -0.614929 | 0.828402  |
| C | -4.385279 | -2.065281 | -0.195598 |
| H | -5.289037 | -0.852936 | 1.23779   |
| C | -5.632207 | -2.886563 | -0.42154  |
| H | -5.965185 | -2.814866 | -1.46567  |
| H | -5.439806 | -3.951332 | -0.232927 |
| H | -6.458151 | -2.570267 | 0.222177  |
| C | -2.657785 | 3.042147  | 1.806037  |
| H | -3.546307 | 3.642828  | 1.570456  |
| H | -1.859765 | 3.720877  | 2.120543  |
| H | -2.928428 | 2.417025  | 2.666878  |
| C | -3.209905 | -2.465304 | -1.053945 |
| H | -2.927153 | -3.509034 | -0.860379 |
| H | -2.329057 | -1.839612 | -0.9056   |
| H | -3.484265 | -2.416076 | -2.116096 |
| C | 4.80489   | -0.581795 | 0.354545  |
| H | 5.127993  | -0.051709 | 1.262065  |
| H | 5.518968  | -0.280614 | -0.424017 |
| C | 4.937471  | -2.089471 | 0.592259  |
| H | 4.276027  | -2.394603 | 1.412757  |
| H | 4.597316  | -2.632642 | -0.298553 |
| C | 6.37631   | -2.494445 | 0.925857  |
| H | 6.456139  | -3.572063 | 1.100263  |
| H | 7.058505  | -2.235438 | 0.108179  |
| H | 6.730461  | -1.981691 | 1.827415  |

|                |         |         |          |
|----------------|---------|---------|----------|
| Frequencies -- | 10.9196 | 19.1188 | 32.5773  |
| Frequencies -- | 39.1932 | 43.0707 | 58.5228  |
| Frequencies -- | 76.7369 | 89.8641 | 103.6740 |

|                                              |                             |  |  |
|----------------------------------------------|-----------------------------|--|--|
| Zero-point correction=                       | 0.430500 (Hartree/Particle) |  |  |
| Thermal correction to Energy=                | 0.454440                    |  |  |
| Thermal correction to Enthalpy=              | 0.455384                    |  |  |
| Thermal correction to Gibbs Free Energy=     | 0.374446                    |  |  |
| Sum of electronic and zero-point Energies=   | -890.982838                 |  |  |
| Sum of electronic and thermal Energies=      | -890.958898                 |  |  |
| Sum of electronic and thermal Enthalpies=    | -890.957954                 |  |  |
| Sum of electronic and thermal Free Energies= | -891.038892                 |  |  |

aa-cbgv-o.log

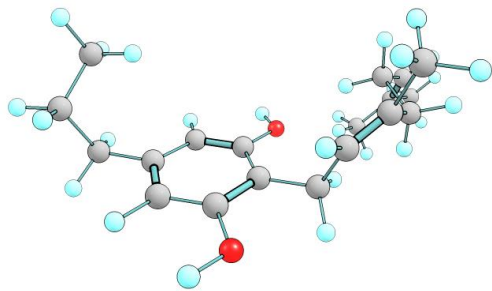

49 Atoms

|   |           |           |           |
|---|-----------|-----------|-----------|
| C | 1.011874  | -0.714573 | -0.531168 |
| C | 2.200741  | -1.415986 | -0.296608 |
| C | 3.435817  | -0.791032 | -0.4846   |
| C | 3.460993  | 0.541477  | -0.910851 |
| C | 2.265626  | 1.228129  | -1.140535 |
| C | 1.012694  | 0.616837  | -0.967929 |
| H | 2.158891  | -2.449144 | 0.03886   |
| H | 4.411781  | 1.047714  | -1.060909 |
| O | -0.211404 | -1.307486 | -0.348299 |
| H | -0.090685 | -2.219856 | -0.052103 |
| O | 2.25205   | 2.536653  | -1.548625 |
| H | 3.16178   | 2.850624  | -1.64398  |
| C | -0.270409 | 1.390076  | -1.203723 |
| C | -0.63059  | 2.239938  | -0.004741 |
| H | -1.072584 | 0.692198  | -1.447309 |
| H | -0.123995 | 2.040454  | -2.075506 |
| C | -1.799171 | 2.277267  | 0.652777  |
| H | 0.18105   | 2.876646  | 0.347453  |
| C | -3.009438 | 1.444739  | 0.281441  |
| H | -3.919649 | 2.029563  | 0.469822  |
| H | -3.01727  | 1.203233  | -0.785823 |
| C | -3.097635 | 0.115306  | 1.07701   |
| C | -4.380564 | -0.625417 | 0.799585  |
| H | -3.037021 | 0.33932   | 2.149714  |
| H | -2.218019 | -0.485656 | 0.832141  |
| C | -4.58577  | -1.588136 | -0.113291 |
| H | -5.240907 | -0.296147 | 1.384528  |
| C | -5.947645 | -2.21408  | -0.297781 |
| H | -6.309914 | -2.068663 | -1.324356 |
| H | -5.904877 | -3.299892 | -0.138045 |
| H | -6.691015 | -1.797806 | 0.388291  |
| C | -1.980746 | 3.163138  | 1.863135  |
| H | -2.76921  | 3.907439  | 1.6896    |
| H | -1.061612 | 3.693893  | 2.127687  |
| H | -2.296963 | 2.577976  | 2.736519  |
| C | -3.51991  | -2.13146  | -1.033629 |
| H | -3.392972 | -3.212086 | -0.882134 |
| H | -2.548028 | -1.653275 | -0.906559 |
| H | -3.825328 | -2.004789 | -2.080835 |
| C | 4.730603  | -1.517292 | -0.190357 |
| H | 5.450225  | -1.31432  | -0.992722 |
| H | 4.554139  | -2.599666 | -0.189222 |
| C | 5.362698  | -1.109041 | 1.158016  |
| H | 6.342064  | -1.595974 | 1.24389   |
| H | 5.551969  | -0.028072 | 1.147829  |
| C | 4.499752  | -1.470895 | 2.369673  |
| H | 4.985946  | -1.174619 | 3.304733  |
| H | 3.524909  | -0.975083 | 2.322878  |
| H | 4.318614  | -2.551312 | 2.412399  |

|                |         |         |          |
|----------------|---------|---------|----------|
| Frequencies -- | 12.0208 | 23.7219 | 32.6120  |
| Frequencies -- | 36.4882 | 46.6630 | 58.4835  |
| Frequencies -- | 80.3583 | 85.7136 | 101.7585 |

|                                              |             |                    |
|----------------------------------------------|-------------|--------------------|
| Zero-point correction=                       | 0.430698    | (Hartree/Particle) |
| Thermal correction to Energy=                | 0.454473    |                    |
| Thermal correction to Enthalpy=              | 0.455417    |                    |
| Thermal correction to Gibbs Free Energy=     | 0.375223    |                    |
| Sum of electronic and zero-point Energies=   | -890.984804 |                    |
| Sum of electronic and thermal Energies=      | -890.961030 |                    |
| Sum of electronic and thermal Enthalpies=    | -890.960085 |                    |
| Sum of electronic and thermal Free Energies= | -891.040279 |                    |

aa-cbgv-u.log

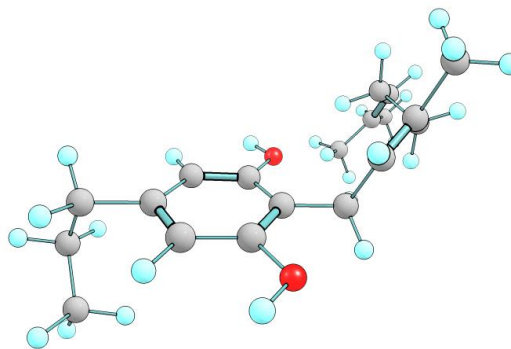

49 Atoms

|   |           |           |           |
|---|-----------|-----------|-----------|
| C | -1.030721 | -0.509032 | -0.194768 |
| C | -2.194835 | -1.014473 | -0.780856 |
| C | -3.397532 | -0.306033 | -0.685795 |
| C | -3.411194 | 0.909567  | 0.002896  |
| C | -2.237354 | 1.401665  | 0.585574  |
| C | -1.022807 | 0.704004  | 0.510579  |
| H | -2.160931 | -1.96043  | -1.316304 |
| H | -4.333287 | 1.479567  | 0.086502  |
| O | 0.161857  | -1.181036 | -0.282781 |
| H | 0.038462  | -1.999031 | -0.783188 |
| O | -2.214447 | 2.596352  | 1.257337  |
| H | -3.103039 | 2.977898  | 1.259397  |
| C | 0.242396  | 1.272018  | 1.123624  |
| C | 0.89215   | 2.28624   | 0.207622  |
| H | 0.927873  | 0.456235  | 1.357068  |
| H | -0.023933 | 1.759569  | 2.070041  |
| C | 2.166056  | 2.316668  | -0.211087 |
| H | 0.214709  | 3.064325  | -0.144237 |
| C | 3.216373  | 1.30012   | 0.188089  |
| H | 4.18425   | 1.807927  | 0.295759  |
| H | 2.994538  | 0.856144  | 1.163263  |
| C | 3.368644  | 0.150583  | -0.842604 |
| C | 4.522573  | -0.758858 | -0.507805 |
| H | 3.531737  | 0.585713  | -1.836949 |
| H | 2.421199  | -0.392363 | -0.889583 |
| C | 4.481995  | -1.911473 | 0.179178  |
| H | 5.501664  | -0.399757 | -0.829308 |
| C | 5.740137  | -2.696714 | 0.463761  |
| H | 5.891974  | -2.815573 | 1.544997  |
| H | 5.671022  | -3.711742 | 0.049848  |
| C | 6.630082  | -2.217957 | 0.044988  |
| H | 2.645723  | 3.390057  | -1.160246 |
| H | 3.436192  | 3.996379  | -0.698481 |
| H | 1.837574  | 4.059455  | -1.469031 |
| H | 3.084708  | 2.949797  | -2.065003 |
| C | 3.221728  | -2.530462 | 0.733439  |
| H | 3.063523  | -3.531068 | 0.308508  |
| H | 2.325842  | -1.936204 | 0.549726  |
| H | 3.316732  | -2.671904 | 1.81826   |
| C | -4.662434 | -0.877157 | -1.289412 |
| H | -4.443499 | -1.259648 | -2.293743 |
| H | -5.406032 | -0.080121 | -1.409204 |
| C | -5.276967 | -2.016852 | -0.448208 |
| H | -6.120736 | -2.443125 | -1.004919 |
| H | -4.535733 | -2.819389 | -0.343225 |
| C | -5.748964 | -1.56597  | 0.936526  |
| H | -6.183995 | -2.399443 | 1.497401  |
| H | -4.919219 | -1.159367 | 1.523374  |
| H | -6.510767 | -0.781802 | 0.854541  |

|                |         |         |          |
|----------------|---------|---------|----------|
| Frequencies -- | 19.3090 | 25.6588 | 30.9150  |
| Frequencies -- | 37.6094 | 47.8754 | 59.3004  |
| Frequencies -- | 74.9184 | 83.5266 | 103.6478 |

|                                              |             |                    |
|----------------------------------------------|-------------|--------------------|
| Zero-point correction=                       | 0.430754    | (Hartree/Particle) |
| Thermal correction to Energy=                | 0.454521    |                    |
| Thermal correction to Enthalpy=              | 0.455465    |                    |
| Thermal correction to Gibbs Free Energy=     | 0.375714    |                    |
| Sum of electronic and zero-point Energies=   | -890.984722 |                    |
| Sum of electronic and thermal Energies=      | -890.960956 |                    |
| Sum of electronic and thermal Enthalpies=    | -890.960012 |                    |
| Sum of electronic and thermal Free Energies= | -891.039762 |                    |

ss-cbgv-e.log

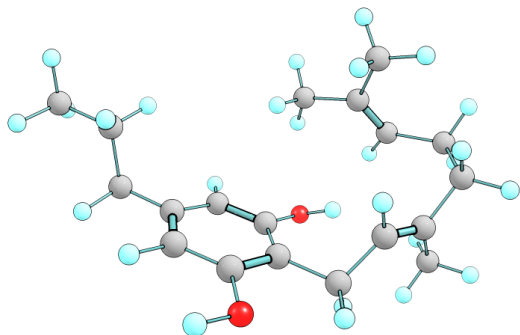

49 Atoms

|   |           |           |           |
|---|-----------|-----------|-----------|
| C | 0.55197   | 0.606766  | -0.971544 |
| C | 1.801482  | 0.011051  | -1.159729 |
| C | 2.919672  | 0.489916  | -0.472523 |
| C | 2.763679  | 1.56692   | 0.406617  |
| C | 1.509547  | 2.161365  | 0.584005  |
| C | 0.37627   | 1.703357  | -0.10823  |
| H | 1.879064  | -0.834248 | -1.835952 |
| H | 3.620653  | 1.947613  | 0.957926  |
| O | -0.500587 | 0.102107  | -1.692395 |
| H | -1.305149 | 0.155101  | -1.146172 |
| O | 1.337825  | 3.22589   | 1.431335  |
| H | 2.189879  | 3.459315  | 1.82437   |
| C | -0.983956 | 2.362884  | 0.0407    |
| C | -2.007126 | 1.408701  | 0.613398  |
| H | -1.306654 | 2.742719  | -0.934383 |
| H | -0.882801 | 3.229393  | 0.700433  |
| C | -3.19173  | 1.033486  | 0.097329  |
| H | -1.703181 | 0.950379  | 1.554491  |
| C | -4.023382 | -0.008331 | 0.814541  |
| H | -3.571977 | -0.218009 | 1.789094  |
| H | -5.031444 | 0.385851  | 1.004244  |
| C | -4.162345 | -1.345333 | 0.030991  |
| C | -2.843755 | -1.887707 | -0.472326 |
| H | -4.834994 | -1.196646 | -0.820197 |
| H | -4.661507 | -2.066603 | 0.689635  |
| C | -1.865846 | -2.437578 | 0.265096  |
| H | -2.65685  | -1.767347 | -1.539348 |
| C | -0.556331 | -2.860517 | -0.353209 |
| H | 0.278286  | -2.306121 | 0.095139  |
| H | -0.362574 | -3.926037 | -0.172715 |
| H | -0.532891 | -2.673109 | -1.428727 |
| C | -3.769629 | 1.54608   | -1.199572 |
| H | -3.869696 | 0.733488  | -1.929855 |
| H | -3.171424 | 2.334598  | -1.658678 |
| H | -4.779361 | 1.940242  | -1.03309  |
| C | -1.960813 | -2.651985 | 1.755382  |
| H | -1.648718 | -3.669655 | 2.02035   |
| H | -2.966426 | -2.491685 | 2.149631  |
| H | -1.280375 | -1.970082 | 2.282439  |
| C | 4.258479  | -0.198389 | -0.612985 |
| H | 5.068698  | 0.525333  | -0.459529 |
| H | 4.370625  | -0.587007 | -1.632775 |
| C | 4.428066  | -1.360271 | 0.385349  |
| H | 3.613161  | -2.079507 | 0.232905  |
| H | 4.308777  | -0.971756 | 1.404716  |
| C | 5.780357  | -2.063663 | 0.24757   |
| H | 5.87718   | -2.886255 | 0.963578  |
| H | 6.606824  | -1.365899 | 0.42473   |
| H | 5.907317  | -2.478559 | -0.758944 |

|                |         |         |          |
|----------------|---------|---------|----------|
| Frequencies -- | 17.6912 | 27.0209 | 31.3005  |
| Frequencies -- | 43.3436 | 58.4183 | 68.5616  |
| Frequencies -- | 84.5463 | 87.9587 | 110.1848 |

|                                              |                             |
|----------------------------------------------|-----------------------------|
| Zero-point correction=                       | 0.430517 (Hartree/Particle) |
| Thermal correction to Energy=                | 0.454254                    |
| Thermal correction to Enthalpy=              | 0.455198                    |
| Thermal correction to Gibbs Free Energy=     | 0.376027                    |
| Sum of electronic and zero-point Energies=   | -890.988489                 |
| Sum of electronic and thermal Energies=      | -890.964753                 |
| Sum of electronic and thermal Enthalpies=    | -890.963809                 |
| Sum of electronic and thermal Free Energies= | -891.042980                 |

ss-cbgv-o.log

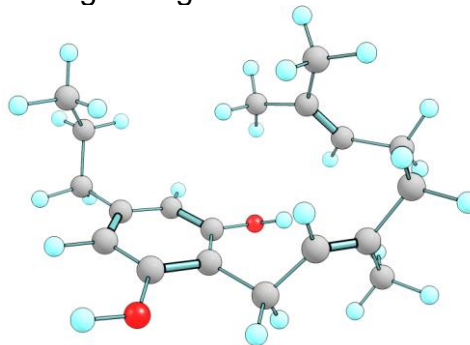

49 Atoms

|   |           |           |           |
|---|-----------|-----------|-----------|
| C | -0.629572 | -0.664682 | -1.055328 |
| C | -1.8442   | -0.028739 | -1.313787 |
| C | -2.990094 | -0.380446 | -0.594111 |
| C | -2.894644 | -1.376887 | 0.381612  |
| C | -1.673881 | -2.018476 | 0.625391  |
| C | -0.516335 | -1.688293 | -0.096136 |
| H | -1.871401 | 0.755357  | -2.063509 |
| H | -3.771052 | -1.655208 | 0.962127  |
| O | 0.457886  | -0.274932 | -1.797031 |
| H | 1.244721  | -0.305075 | -1.224783 |
| O | -1.562083 | -3.001984 | 1.574388  |
| H | -2.425993 | -3.148016 | 1.983448  |
| C | 0.809919  | -2.393494 | 0.128732  |
| C | 1.850482  | -1.444588 | 0.678361  |
| H | 1.143793  | -2.836886 | -0.815158 |
| H | 0.655845  | -3.217761 | 0.831053  |
| C | 3.051717  | -1.120252 | 0.166568  |
| H | 1.540724  | -0.934931 | 1.590772  |
| C | 3.889426  | -0.057737 | 0.845224  |
| H | 3.435703  | 0.193851  | 1.808592  |
| H | 4.894134  | -0.45023  | 1.054622  |
| C | 4.039724  | 1.246454  | 0.009164  |
| C | 2.726958  | 1.775233  | -0.523407 |
| H | 4.715998  | 1.059916  | -0.831671 |
| H | 4.539366  | 1.990798  | 0.641344  |
| C | 1.742941  | 2.349214  | 0.186862  |
| H | 2.549126  | 1.62013   | -1.587415 |
| C | 0.438019  | 2.749701  | -0.45582  |
| H | -0.401446 | 2.225198  | 0.018504  |
| H | 0.250806  | 3.824364  | -0.331118 |
| H | 0.415301  | 2.506791  | -1.520366 |
| C | 3.640823  | -1.707279 | -1.093354 |
| H | 3.768466  | -0.93478  | -1.862134 |
| H | 3.035212  | -2.507243 | -1.522069 |
| H | 4.640144  | -2.110657 | -0.890392 |
| C | 1.82537   | 2.614478  | 1.669641  |
| H | 1.50561   | 3.638755  | 1.897417  |
| H | 2.828876  | 2.473124  | 2.076363  |
| H | 1.144458  | 1.946863  | 2.214205  |
| C | -4.287015 | 0.364727  | -0.826128 |
| H | -5.114764 | -0.177376 | -0.353212 |
| H | -4.501646 | 0.396606  | -1.901403 |
| C | -4.253719 | 1.810036  | -0.283914 |
| H | -5.192724 | 2.30724   | -0.557119 |
| H | -3.450808 | 2.360696  | -0.79025  |
| C | -4.050442 | 1.885654  | 1.231648  |
| H | -4.043909 | 2.923797  | 1.579003  |
| H | -3.101963 | 1.424293  | 1.525088  |
| H | -4.85186  | 1.357983  | 1.761922  |

|                |         |          |          |
|----------------|---------|----------|----------|
| Frequencies -- | 17.9757 | 30.3451  | 40.3201  |
| Frequencies -- | 44.0039 | 57.2921  | 64.8426  |
| Frequencies -- | 81.7078 | 107.1734 | 114.4724 |

|                                              |                             |
|----------------------------------------------|-----------------------------|
| Zero-point correction=                       | 0.430862 (Hartree/Particle) |
| Thermal correction to Energy=                | 0.454396                    |
| Thermal correction to Enthalpy=              | 0.455340                    |
| Thermal correction to Gibbs Free Energy=     | 0.377137                    |
| Sum of electronic and zero-point Energies=   | -890.988559                 |
| Sum of electronic and thermal Energies=      | -890.965025                 |
| Sum of electronic and thermal Enthalpies=    | -890.964081                 |
| Sum of electronic and thermal Free Energies= | -891.042284                 |

ss-cbgv-u.log

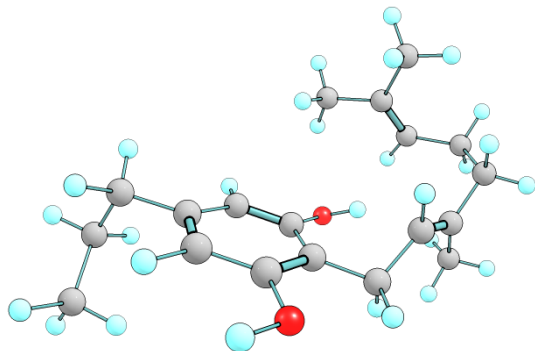

49 Atoms

|   |           |           |           |
|---|-----------|-----------|-----------|
| C | -0.731498 | -0.036221 | -0.584836 |
| C | -1.804163 | 0.850213  | -0.468969 |
| C | -2.8988   | 0.530446  | 0.340364  |
| C | -2.890837 | -0.681194 | 1.037795  |
| C | -1.813051 | -1.566242 | 0.912022  |
| C | -0.715001 | -1.272191 | 0.088657  |
| H | -1.762572 | 1.790241  | -1.009993 |
| H | -3.727305 | -0.944371 | 1.680762  |
| O | 0.299968  | 0.328489  | -1.411978 |
| H | 1.135352  | -0.002183 | -1.035422 |
| O | -1.793436 | -2.763904 | 1.579478  |
| H | -2.612145 | -2.859027 | 2.08497   |
| C | 0.438865  | -2.241987 | -0.098447 |
| C | 1.749534  | -1.656646 | 0.37544   |
| H | 0.497815  | -2.524499 | -1.154827 |
| H | 0.223175  | -3.156272 | 0.462018  |
| C | 2.895347  | -1.496233 | -0.31133  |
| H | 1.725449  | -1.296042 | 1.403857  |
| C | 4.075723  | -0.815104 | 0.346032  |
| H | 3.844925  | -0.634341 | 1.400455  |
| H | 4.950199  | -1.480258 | 0.317578  |
| C | 4.469278  | 0.534544  | -0.31938  |
| C | 3.296045  | 1.463947  | -0.53494  |
| H | 4.948087  | 0.335436  | -1.283839 |
| H | 5.236056  | 1.004621  | 0.308332  |
| C | 2.630566  | 2.1496    | 0.408263  |
| H | 2.930493  | 1.538243  | -1.55912  |
| C | 1.419164  | 2.982893  | 0.071022  |
| H | 0.535132  | 2.610378  | 0.604532  |
| H | 1.561235  | 4.025989  | 0.382566  |
| H | 1.191105  | 2.960654  | -0.996747 |
| C | 3.106291  | -1.91832  | -1.74543  |
| H | 3.262367  | -1.043856 | -2.389451 |
| H | 2.27202   | -2.48897  | -2.156059 |
| H | 4.010983  | -2.532167 | -1.82952  |
| C | 2.995337  | 2.128159  | 1.872078  |
| H | 3.034976  | 3.14702   | 2.276854  |
| H | 3.955355  | 1.646805  | 2.069707  |
| H | 2.22747   | 1.593984  | 2.447382  |
| C | -4.08008  | 1.472657  | 0.427127  |
| H | -3.715103 | 2.501682  | 0.530076  |
| H | -4.664932 | 1.251931  | 1.328428  |
| C | -5.006851 | 1.396493  | -0.805497 |
| H | -4.420416 | 1.628255  | -1.70364  |
| H | -5.766986 | 2.182776  | -0.717927 |
| C | -5.69019  | 0.036645  | -0.971469 |
| H | -6.34386  | 0.026285  | -1.849627 |
| H | -6.302005 | -0.203561 | -0.093957 |
| H | -4.95321  | -0.764185 | -1.088417 |

|                |         |          |          |
|----------------|---------|----------|----------|
| Frequencies -- | 21.3052 | 26.5084  | 29.9091  |
| Frequencies -- | 44.1295 | 60.7222  | 61.8188  |
| Frequencies -- | 76.1323 | 105.9411 | 106.5360 |

|                                              |                             |
|----------------------------------------------|-----------------------------|
| Zero-point correction=                       | 0.430635 (Hartree/Particle) |
| Thermal correction to Energy=                | 0.454267                    |
| Thermal correction to Enthalpy=              | 0.455211                    |
| Thermal correction to Gibbs Free Energy=     | 0.376395                    |
| Sum of electronic and zero-point Energies=   | -890.988265                 |
| Sum of electronic and thermal Energies=      | -890.964633                 |
| Sum of electronic and thermal Enthalpies=    | -890.963689                 |
| Sum of electronic and thermal Free Energies= | -891.042504                 |



# Cannabigerocin-AA-1+3t

aa-1+4+5-.log

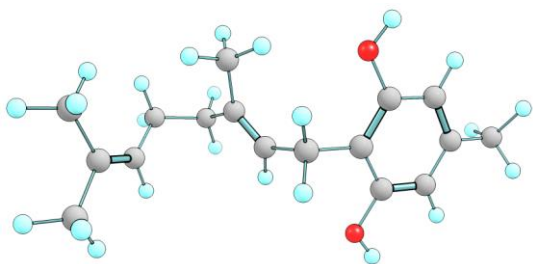

43 Atoms

|   |           |           |           |
|---|-----------|-----------|-----------|
| C | 2.589441  | 1.36346   | -0.094305 |
| C | 3.942447  | 1.290958  | 0.254186  |
| C | 4.626304  | 0.074739  | 0.164662  |
| C | 3.937328  | -1.056747 | -0.282088 |
| C | 2.58359   | -0.968497 | -0.626159 |
| C | 1.880413  | 0.242891  | -0.551998 |
| H | 4.458078  | 2.184142  | 0.59862   |
| H | 4.450705  | -2.012106 | -0.361308 |
| O | 1.88579   | 2.537316  | -0.009491 |
| H | 2.473558  | 3.239852  | 0.300605  |
| O | 1.884557  | -2.064049 | -1.063784 |
| H | 2.470369  | -2.83318  | -1.077239 |
| C | 0.409154  | 0.334948  | -0.908573 |
| C | -0.475366 | 0.249813  | 0.315245  |
| H | 0.161197  | -0.444922 | -1.629739 |
| H | 0.231699  | 1.298376  | -1.400819 |
| C | -1.303447 | -0.746493 | 0.661839  |
| H | -0.397011 | 1.108907  | 0.981137  |
| C | -2.136404 | -0.650897 | 1.922571  |
| H | -1.908774 | -1.505242 | 2.576615  |
| H | -1.869243 | 0.255348  | 2.47952   |
| C | -3.664392 | -0.644574 | 1.658526  |
| C | -4.096421 | 0.547917  | 0.850524  |
| H | -4.172103 | -0.628066 | 2.633341  |
| H | -3.956176 | -1.583111 | 1.178576  |
| C | -4.70278  | 0.576248  | -0.346102 |
| H | -3.84819  | 1.507869  | 1.307727  |
| C | -5.033755 | 1.887493  | -1.01905  |
| H | -4.544351 | 1.957123  | -1.999727 |
| H | -6.112491 | 1.973219  | -1.206427 |
| H | -4.721663 | 2.748524  | -0.421071 |
| C | -1.501693 | -2.005314 | -0.152246 |
| H | -1.615548 | -2.872399 | 0.509729  |
| H | -0.663991 | -2.205049 | -0.822119 |
| H | -2.418126 | -1.949561 | -0.752907 |
| C | -5.10922  | -0.64222  | -1.138817 |
| H | -6.187186 | -0.624668 | -1.346018 |
| H | -4.879688 | -1.584169 | -0.637752 |
| H | -4.607365 | -0.647738 | -2.115246 |
| C | 6.07611   | -0.023199 | 0.577184  |
| H | 6.601013  | -0.799392 | 0.012574  |
| H | 6.164299  | -0.277878 | 1.640517  |
| H | 6.600358  | 0.924826  | 0.425224  |

|                |         |          |          |
|----------------|---------|----------|----------|
| Frequencies -- | 16.5127 | 22.7803  | 34.4830  |
| Frequencies -- | 36.9845 | 46.5963  | 49.9029  |
| Frequencies -- | 79.4428 | 112.1908 | 132.6229 |

Zero-point correction= 0.372947 (Hartree/Particle)  
 Thermal correction to Energy= 0.394351  
 Thermal correction to Enthalpy= 0.395295  
 Thermal correction to Gibbs Free Energy= 0.320269  
 Sum of electronic and zero-point Energies= -812.401083  
 Sum of electronic and thermal Energies= -812.379679  
 Sum of electronic and thermal Enthalpies= -812.378734  
 Sum of electronic and thermal Free Energies= -812.453761

aa-1+4+5+.log

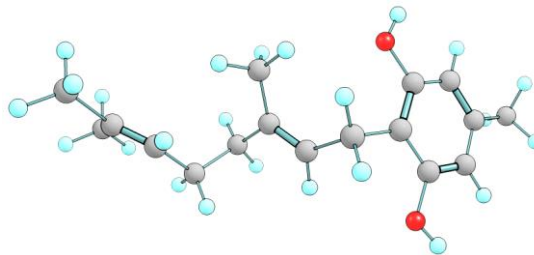

43 Atoms

|   |           |           |           |
|---|-----------|-----------|-----------|
| C | -3.031451 | -1.180002 | -0.494099 |
| C | -4.29923  | -1.062732 | 0.086055  |
| C | -4.765495 | 0.186376  | 0.507158  |
| C | -3.948206 | 1.307212  | 0.332636  |
| C | -2.681985 | 1.173978  | -0.248784 |
| C | -2.198061 | -0.068109 | -0.68555  |
| H | -4.917662 | -1.948293 | 0.212532  |
| H | -4.292597 | 2.288318  | 0.651057  |
| O | -2.537782 | -2.390455 | -0.908219 |
| H | -3.197758 | -3.077435 | -0.742304 |
| O | -1.858962 | 2.255384  | -0.428264 |
| H | -2.300048 | 3.050482  | -0.099321 |
| C | -0.816201 | -0.216633 | -1.293336 |
| C | 0.204336  | -0.650996 | -0.264955 |
| H | -0.527226 | 0.723483  | -1.765258 |
| H | -0.864054 | -0.975599 | -2.082642 |
| C | 1.199168  | 0.071132  | 0.272464  |
| H | 0.075867  | -1.677192 | 0.081556  |
| C | 2.1444    | -0.575663 | 1.273065  |
| H | 2.562277  | 0.191418  | 1.936764  |
| H | 1.591136  | -1.27953  | 1.906548  |
| C | 3.320629  | -1.351243 | 0.617949  |
| C | 4.168329  | -0.517777 | -0.306059 |
| H | 2.891773  | -2.185587 | 0.047612  |
| H | 3.924928  | -1.796104 | 1.415574  |
| C | 5.368056  | 0.031279  | -0.0576   |
| H | 3.723265  | -0.326351 | -1.282728 |
| C | 6.074401  | 0.86401   | -1.100789 |
| H | 6.263607  | 1.879667  | -0.728531 |
| H | 7.056438  | 0.437481  | -1.345319 |
| H | 5.495998  | 0.942415  | -2.02586  |
| C | 1.482993  | 1.518508  | -0.046982 |
| H | 1.413401  | 2.119696  | 0.869195  |
| H | 0.787661  | 1.94429   | -0.770851 |
| C | 2.507251  | 1.64085   | -0.417743 |
| H | 6.122064  | -0.105173 | 1.242486  |
| H | 7.112041  | -0.547531 | 1.070521  |
| H | 5.602422  | -0.71419  | 1.984514  |
| H | 6.299249  | 0.883804  | 1.684954  |
| C | -6.115717 | 0.317817  | 1.171676  |
| H | -6.561841 | 1.29814   | 0.98008   |
| H | -6.029208 | 0.206293  | 2.259511  |

|                |         |         |          |
|----------------|---------|---------|----------|
| Frequencies -- | 12.6409 | 17.4362 | 23.5295  |
| Frequencies -- | 36.7243 | 39.5012 | 50.7178  |
| Frequencies -- | 92.3240 | 97.2866 | 109.8537 |

Zero-point correction= 0.372644 (Hartree/Particle)  
 Thermal correction to Energy= 0.394264  
 Thermal correction to Enthalpy= 0.395208  
 Thermal correction to Gibbs Free Energy= 0.318636  
 Sum of electronic and zero-point Energies= -812.398728  
 Sum of electronic and thermal Energies= -812.377108  
 Sum of electronic and thermal Enthalpies= -812.376164  
 Sum of electronic and thermal Free Energies= -812.452736

aa-1+4+5a.log

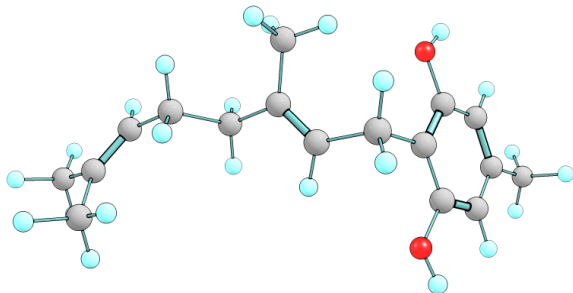

43 Atoms

|   |           |           |           |
|---|-----------|-----------|-----------|
| C | -2.833649 | -1.29422  | -0.588621 |
| C | -3.97141  | -1.598784 | 0.166773  |
| C | -4.659629 | -0.584803 | 0.839705  |
| C | -4.188041 | 0.728288  | 0.747795  |
| C | -3.048597 | 1.017134  | -0.011527 |
| C | -2.351459 | 0.017558  | -0.706214 |
| H | -4.314198 | -2.628663 | 0.231999  |
| H | -4.703695 | 1.530841  | 1.269813  |
| O | -2.126987 | -2.265417 | -1.24997  |
| H | -2.556152 | -3.121126 | -1.113111 |
| O | -2.561728 | 2.294781  | -0.113976 |
| H | -3.124337 | 2.893749  | 0.395544  |
| C | -1.099807 | 0.328359  | -1.504085 |
| C | 0.155913  | 0.083081  | -0.69771  |
| H | -1.145096 | 1.357811  | -1.862148 |
| H | -1.081305 | -0.320847 | -2.387372 |
| C | 1.037656  | 0.991084  | -0.252506 |
| H | 0.3277    | -0.964484 | -0.450104 |
| C | 2.257551  | 0.552405  | 0.530166  |
| H | 2.285052  | 1.082885  | 1.493764  |
| H | 2.196674  | -0.517365 | 0.760383  |
| C | 3.592876  | 0.819663  | -0.209404 |
| C | 4.784719  | 0.422386  | 0.618218  |
| H | 3.661581  | 1.890464  | -0.442744 |
| H | 3.571284  | 0.294865  | -1.169589 |
| C | 5.62361   | -0.60816  | 0.428656  |
| H | 4.950145  | 1.048261  | 1.497189  |
| C | 6.763108  | -0.870418 | 1.384906  |
| H | 6.682203  | -1.873206 | 1.825244  |
| H | 7.728544  | -0.840762 | 0.86219   |
| H | 6.794465  | -0.141532 | 2.199798  |
| C | 0.919621  | 2.479259  | -0.495659 |
| H | 1.235613  | 3.03494   | 0.395585  |
| H | -0.101142 | 2.782633  | -0.732692 |
| H | 1.57433   | 2.805708  | -1.313718 |
| C | 5.537224  | -1.590591 | -0.713883 |
| H | 6.462407  | -1.57742  | -1.304851 |
| H | 4.701833  | -1.399241 | -1.389578 |
| H | 5.431996  | -2.61336  | -0.329243 |
| C | -5.909739 | -0.896879 | 1.628015  |
| H | -6.025477 | -0.218887 | 2.478798  |
| H | -5.898302 | -1.923038 | 2.006632  |

|                |         |         |          |
|----------------|---------|---------|----------|
| Frequencies -- | 20.7712 | 21.8675 | 30.3120  |
| Frequencies -- | 42.1729 | 50.7048 | 55.6290  |
| Frequencies -- | 71.2281 | 88.4504 | 119.8437 |

Zero-point correction= 0.372624 (Hartree/Particle)  
 Thermal correction to Energy= 0.394277  
 Thermal correction to Enthalpy= 0.395221  
 Thermal correction to Gibbs Free Energy= 0.319427  
 Sum of electronic and zero-point Energies= -812.400190  
 Sum of electronic and thermal Energies= -812.378537  
 Sum of electronic and thermal Enthalpies= -812.377592  
 Sum of electronic and thermal Free Energies= -812.453387

aa-1+4-5+.log

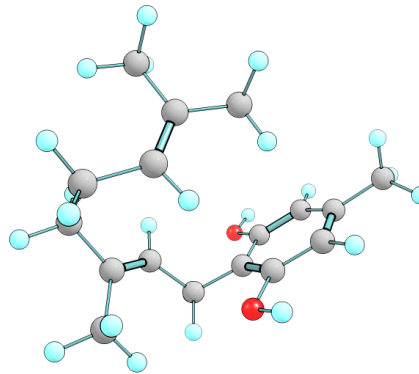

43 Atoms

|   |           |           |           |
|---|-----------|-----------|-----------|
| C | -2.036059 | -0.849104 | 1.192501  |
| C | -3.009276 | 0.096709  | 0.847235  |
| C | -3.112825 | 0.550705  | -0.470026 |
| C | -2.237752 | 0.037195  | -1.432774 |
| C | -1.267623 | -0.903272 | -1.071344 |
| C | -1.152958 | -1.382169 | 0.242589  |
| H | -3.677169 | 0.484038  | 1.613051  |
| H | -2.299864 | 0.376903  | -2.463899 |
| O | -1.896853 | -1.294252 | 2.481672  |
| H | -2.558563 | -0.863087 | 3.039518  |
| O | -0.375088 | -1.399845 | -1.984268 |
| H | -0.538211 | -0.990622 | -2.844991 |
| C | -0.049758 | -2.350793 | 0.629977  |
| C | 1.208375  | -1.566963 | 0.921557  |
| H | 0.104418  | -3.068598 | -0.178082 |
| H | -0.36318  | -2.910881 | 1.516673  |
| C | 2.32891   | -1.491525 | 0.188636  |
| H | 1.120629  | -0.902687 | 1.781742  |
| C | 3.372594  | -0.445369 | 0.520194  |
| H | 3.212282  | -0.069131 | 1.536835  |
| H | 4.38199   | -0.878716 | 0.486816  |
| C | 3.320739  | 0.765891  | -0.45719  |
| C | 1.935618  | 1.349755  | -0.565913 |
| H | 3.650713  | 0.436092  | -1.450582 |
| H | 4.050955  | 1.510291  | -0.123823 |
| C | 1.442324  | 2.423719  | 0.06964   |
| H | 1.249151  | 0.775339  | -1.186917 |
| C | -0.002592 | 2.830481  | -0.098518 |
| H | -0.525613 | 2.813492  | 0.867289  |
| H | -0.083223 | 3.859192  | -0.47518  |
| H | -0.54187  | 2.166447  | -0.779065 |
| C | 2.607945  | -2.310764 | -1.046316 |
| H | 2.687047  | -1.66701  | -1.930585 |
| H | 1.833653  | -3.049641 | -1.253448 |
| H | 3.569011  | -2.832349 | -0.94959  |
| C | 2.23189   | 3.302216  | 1.009048  |
| H | 2.212541  | 4.347072  | 0.672115  |
| H | 3.275651  | 2.999087  | 1.1126    |
| H | 1.779481  | 3.293061  | 2.009506  |
| C | -4.118761 | 1.614108  | -0.840607 |
| H | -4.468128 | 1.493825  | -1.870377 |
| H | -3.672094 | 2.613074  | -0.762871 |

|                |         |          |          |
|----------------|---------|----------|----------|
| Frequencies -- | 24.6519 | 32.7819  | 37.2816  |
| Frequencies -- | 51.6141 | 52.3952  | 72.8952  |
| Frequencies -- | 86.0766 | 103.4222 | 111.4430 |

Zero-point correction= 0.373065 (Hartree/Particle)  
 Thermal correction to Energy= 0.394384  
 Thermal correction to Enthalpy= 0.395328  
 Thermal correction to Gibbs Free Energy= 0.321948  
 Sum of electronic and zero-point Energies= -812.403752  
 Sum of electronic and thermal Energies= -812.382433  
 Sum of electronic and thermal Enthalpies= -812.381489  
 Sum of electronic and thermal Free Energies= -812.454869

b-aa-1+4-5-.log

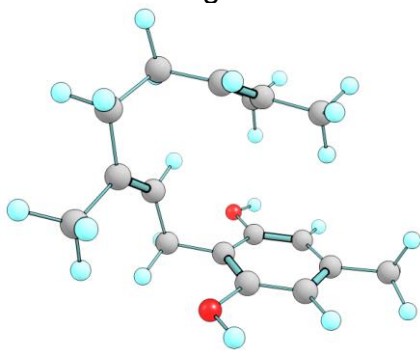

43 Atoms

|   |           |           |           |
|---|-----------|-----------|-----------|
| C | 1.580594  | 0.169445  | 1.387122  |
| C | 2.727028  | -0.367026 | 0.790604  |
| C | 3.147536  | 0.091886  | -0.461249 |
| C | 2.410481  | 1.097422  | -1.094154 |
| C | 1.264566  | 1.621179  | -0.485862 |
| C | 0.82739   | 1.178636  | 0.772198  |
| H | 3.283103  | -1.149381 | 1.301385  |
| H | 2.719536  | 1.470484  | -2.067719 |
| O | 1.127365  | -0.283331 | 2.601647  |
| H | 1.736511  | -0.954699 | 2.938541  |
| O | 0.512611  | 2.593694  | -1.089545 |
| H | 0.902004  | 2.81093   | -1.947497 |
| C | -0.467332 | 1.688246  | 1.379014  |
| C | -1.60612  | 0.813565  | 0.905091  |
| H | -0.612874 | 2.73397   | 1.10399   |
| H | -0.391644 | 1.64013   | 2.470491  |
| C | -2.587951 | 1.119023  | 0.04537   |
| H | -1.525461 | -0.210229 | 1.257151  |
| C | -3.587426 | 0.083687  | -0.445654 |
| H | -4.566776 | 0.283263  | 0.01485   |
| H | -3.743169 | 0.254969  | -1.521398 |
| C | -3.227896 | -1.403529 | -0.244787 |
| C | -1.974168 | -1.793091 | -0.986015 |
| H | -4.075499 | -1.994853 | -0.620148 |
| H | -3.15274  | -1.630765 | 0.822702  |
| C | -0.874123 | -2.399062 | -0.515129 |
| H | -1.970552 | -1.492995 | -2.036024 |
| C | 0.332853  | -2.619203 | -1.39579  |
| H | 1.199814  | -2.080783 | -0.989848 |
| H | 0.611639  | -3.680731 | -1.434447 |
| H | 0.1656    | -2.270764 | -2.419247 |
| C | -2.81186  | 2.492141  | -0.540539 |
| H | -2.668057 | 2.471338  | -1.628419 |
| H | -2.140306 | 3.249041  | -0.134711 |
| H | -3.84553  | 2.819995  | -0.368146 |
| C | -0.694661 | -2.869743 | 0.907843  |
| H | -0.350934 | -3.911726 | 0.926349  |
| H | -1.60961  | -2.810353 | 1.500419  |
| H | 0.07179   | -2.272513 | 1.41653   |
| C | 4.35087   | -0.519914 | -1.138299 |
| H | 4.857548  | 0.202573  | -1.784799 |
| H | 4.052807  | -1.367848 | -1.767293 |

|                |          |          |          |
|----------------|----------|----------|----------|
| Frequencies -- | 21.7432  | 39.8787  | 43.9348  |
| Frequencies -- | 48.7369  | 62.8473  | 71.2064  |
| Frequencies -- | 100.0596 | 115.9059 | 120.6094 |

Zero-point correction= 0.373124 (Hartree/Particle)  
 Thermal correction to Energy= 0.394348  
 Thermal correction to Enthalpy= 0.395292  
 Thermal correction to Gibbs Free Energy= 0.322669  
 Sum of electronic and zero-point Energies= -812.404013  
 Sum of electronic and thermal Energies= -812.382789  
 Sum of electronic and thermal Enthalpies= -812.381845  
 Sum of electronic and thermal Free Energies= -812.454468

b-aa-1+4-5a.log

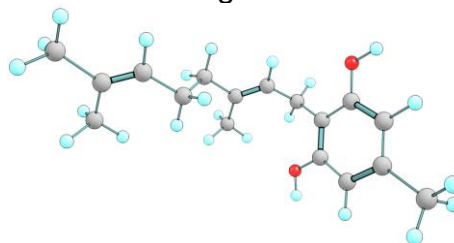

43 Atoms

|   |           |           |           |
|---|-----------|-----------|-----------|
| C | 2.986978  | 0.006968  | 1.237623  |
| C | 3.80813   | -1.0882   | 0.949814  |
| C | 4.035774  | -1.465242 | -0.377499 |
| C | 3.426788  | -0.73425  | -1.401584 |
| C | 2.607663  | 0.359528  | -1.097773 |
| C | 2.376118  | 0.762371  | 0.225429  |
| H | 4.264639  | -1.6475   | 1.76307   |
| H | 3.584611  | -1.014516 | -2.440351 |
| O | 2.731212  | 0.397517  | 2.526834  |
| H | 3.208218  | -0.182035 | 3.136505  |
| O | 1.995442  | 1.089579  | -2.083757 |
| C | 2.231931  | 0.722807  | -2.946554 |
| H | 1.460036  | 1.924738  | 0.558781  |
| C | 0.07182   | 1.450302  | 0.927655  |
| H | 1.431811  | 2.616602  | -0.284022 |
| H | 1.884358  | 2.468042  | 1.410954  |
| C | -1.055728 | 1.560433  | 0.209476  |
| H | 0.019366  | 0.934209  | 1.886519  |
| C | -2.353643 | 0.976729  | 0.731486  |
| H | -2.296197 | 0.834041  | 1.817188  |
| H | -3.179015 | 1.678213  | 0.547971  |
| C | -2.715158 | -0.379507 | 0.072243  |
| C | -4.001795 | -0.946152 | 0.607601  |
| H | -1.893478 | -1.079663 | 0.274757  |
| H | -2.755276 | -0.259404 | -1.014301 |
| C | -5.188874 | -1.040025 | -0.012042 |
| H | -3.948414 | -1.287553 | 1.642974  |
| C | -6.39236  | -1.61934  | 0.693232  |
| H | -7.212228 | -0.889783 | 0.732858  |
| H | -6.782132 | -2.4912   | 0.151027  |
| H | -6.161722 | -1.929266 | 1.716554  |
| C | -1.149546 | 2.228091  | -1.142523 |
| H | -1.723308 | 1.607321  | -1.840912 |
| H | -0.174702 | 2.412539  | -1.594969 |
| H | -1.688925 | 3.181587  | -1.06451  |
| C | -5.457925 | -0.596506 | -1.429552 |
| H | -5.814707 | -1.439065 | -2.036285 |
| H | -4.584891 | -0.168659 | -1.925547 |
| H | -6.257063 | 0.15595   | -1.447219 |
| C | 4.949521  | -2.624333 | -0.699159 |
| H | 4.679912  | -3.094914 | -1.649059 |
| H | 4.91634   | -3.388119 | 0.083395  |

|                |         |         |          |
|----------------|---------|---------|----------|
| Frequencies -- | 13.5035 | 15.5923 | 26.2342  |
| Frequencies -- | 35.8440 | 53.3222 | 60.9748  |
| Frequencies -- | 66.0234 | 90.3536 | 105.8178 |

Zero-point correction= 0.372481 (Hartree/Particle)  
 Thermal correction to Energy= 0.394223  
 Thermal correction to Enthalpy= 0.395167  
 Thermal correction to Gibbs Free Energy= 0.318317  
 Sum of electronic and zero-point Energies= -812.400265  
 Sum of electronic and thermal Energies= -812.378523  
 Sum of electronic and thermal Enthalpies= -812.377579  
 Sum of electronic and thermal Free Energies= -812.454429

aa-1+4a5+.log

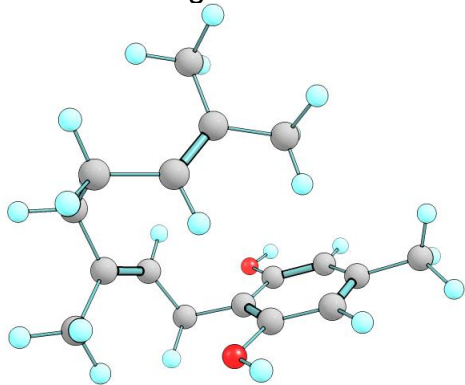

43 Atoms

|                |           |           |           |
|----------------|-----------|-----------|-----------|
| C              | -2.035963 | -0.84889  | 1.192624  |
| C              | -3.009298 | 0.096741  | 0.847305  |
| C              | -3.113015 | 0.550531  | -0.470043 |
| C              | -2.237939 | 0.037032  | -1.432752 |
| C              | -1.267672 | -0.903308 | -1.07126  |
| C              | -1.152871 | -1.382019 | 0.242697  |
| H              | -3.677179 | 0.484134  | 1.613099  |
| H              | -2.300117 | 0.376609  | -2.463914 |
| O              | -1.896572 | -1.293858 | 2.481838  |
| H              | -2.558678 | -0.863169 | 3.039583  |
| O              | -0.375183 | -1.399904 | -1.984215 |
| H              | -0.538429 | -0.990808 | -2.844973 |
| C              | -0.04963  | -2.350581 | 0.630152  |
| C              | 1.208511  | -1.566719 | 0.921632  |
| H              | 0.104545  | -3.068461 | -0.17784  |
| H              | -0.36304  | -2.910572 | 1.51691   |
| C              | 2.329008  | -1.491324 | 0.188649  |
| H              | 1.120822  | -0.902425 | 1.781807  |
| C              | 3.372717  | -0.445164 | 0.520121  |
| H              | 3.212362  | -0.068777 | 1.536699  |
| H              | 4.382103  | -0.878542 | 0.486843  |
| C              | 3.320947  | 0.765973  | -0.457429 |
| C              | 1.935838  | 1.349828  | -0.566323 |
| H              | 3.650995  | 0.436047  | -1.450752 |
| H              | 4.051137  | 1.510405  | -0.124078 |
| C              | 1.442348  | 2.423557  | 0.069473  |
| H              | 1.249535  | 0.77558   | -1.187662 |
| C              | -0.002548 | 2.830324  | -0.098886 |
| H              | -0.525725 | 2.81327   | 0.866833  |
| H              | -0.083109 | 3.859059  | -0.475495 |
| H              | -0.541707 | 2.166337  | -0.779571 |
| C              | 2.607971  | -2.310592 | -1.046309 |
| H              | 2.686414  | -1.666925 | -1.930696 |
| H              | 1.833954  | -3.049874 | -1.253047 |
| H              | 3.569306  | -2.831722 | -0.949859 |
| C              | 2.231661  | 3.301708  | 1.009414  |
| H              | 2.21199   | 4.34677   | 0.673148  |
| H              | 3.275515  | 2.998818  | 1.112748  |
| H              | 1.77928   | 3.291771  | 2.009878  |
| C              | -4.119251 | 1.613667  | -0.840618 |
| H              | -4.468582 | 1.493284  | -1.870382 |
| H              | -3.672936 | 2.612782  | -0.762832 |
| Frequencies -- | 24.6783   | 32.8113   | 37.2703   |
| Frequencies -- | 51.3041   | 52.4024   | 72.8984   |
| Frequencies -- | 86.0471   | 103.4322  | 111.4420  |

Zero-point correction= 0.373065 (Hartree/Particle)  
 Thermal correction to Energy= 0.394384  
 Thermal correction to Enthalpy= 0.395328  
 Thermal correction to Gibbs Free Energy= 0.321945  
 Sum of electronic and zero-point Energies= -812.403752  
 Sum of electronic and thermal Energies= -812.382433  
 Sum of electronic and thermal Enthalpies= -812.381489  
 Sum of electronic and thermal Free Energies= -812.454871

aa-1+4a5-.log

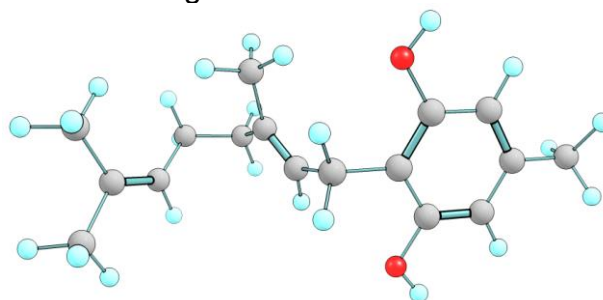

43 Atoms

|                |           |           |           |
|----------------|-----------|-----------|-----------|
| C              | 2.588766  | 1.363379  | -0.094416 |
| C              | 3.941733  | 1.291156  | 0.254341  |
| C              | 4.625871  | 0.075114  | 0.164852  |
| C              | 3.937206  | -1.056506 | -0.282085 |
| C              | 2.583528  | -0.96854  | -0.626399 |
| C              | 1.880058  | 0.242693  | -0.55228  |
| H              | 4.45707   | 2.184428  | 0.598977  |
| H              | 4.450815  | -2.011747 | -0.361254 |
| O              | 1.884854  | 2.537086  | -0.009664 |
| H              | 2.472412  | 3.239722  | 0.300603  |
| O              | 1.88484   | -2.064226 | -1.06426  |
| C              | 2.470734  | -2.833302 | -1.077279 |
| H              | 0.408814  | 0.334524  | -0.909029 |
| C              | -0.47581  | 0.250186  | 0.314786  |
| H              | 0.160894  | -0.445791 | -1.629716 |
| H              | 0.231421  | 1.297649  | -1.401886 |
| C              | -1.303255 | -0.746305 | 0.662366  |
| H              | -0.398054 | 1.110018  | 0.979782  |
| C              | -2.136326 | -0.64992  | 1.92296   |
| H              | -1.90856  | -1.503733 | 2.577653  |
| H              | -1.869364 | 0.256786  | 2.479254  |
| C              | -3.664308 | -0.644029 | 1.658869  |
| C              | -4.096553 | 0.548106  | 0.850456  |
| H              | -4.172032 | -0.627239 | 2.633667  |
| H              | -3.955915 | -1.582805 | 1.179273  |
| C              | -4.702258 | 0.575974  | -0.346507 |
| H              | -3.849017 | 1.508246  | 1.307647  |
| C              | -5.03349  | 1.886958  | -1.019831 |
| H              | -4.543715 | 1.956612  | -2.000321 |
| H              | -6.112184 | 1.972205  | -1.207666 |
| H              | -4.721996 | 2.748224  | -0.42188  |
| C              | -1.500662 | -2.006089 | -0.150438 |
| H              | -1.613982 | -2.872564 | 0.512422  |
| H              | -0.662802 | -2.205964 | -0.820071 |
| H              | -2.41711  | -1.951566 | -0.751189 |
| C              | -5.107654 | -0.642824 | -1.139243 |
| H              | -6.185448 | -0.62566  | -1.347367 |
| H              | -4.878255 | -1.584557 | -0.637714 |
| H              | -4.604968 | -0.648462 | -2.115244 |
| C              | 6.075685  | -0.022642 | 0.577407  |
| H              | 6.601235  | -0.797124 | 0.011036  |
| H              | 6.163942  | -0.279782 | 1.640133  |
| Frequencies -- | 16.5772   | 22.7929   | 34.5234   |
| Frequencies -- | 37.2963   | 46.5401   | 49.9144   |
| Frequencies -- | 79.4872   | 112.1274  | 132.5322  |

Zero-point correction= 0.372946 (Hartree/Particle)  
 Thermal correction to Energy= 0.394350  
 Thermal correction to Enthalpy= 0.395295  
 Thermal correction to Gibbs Free Energy= 0.320278  
 Sum of electronic and zero-point Energies= -812.401083  
 Sum of electronic and thermal Energies= -812.379679  
 Sum of electronic and thermal Enthalpies= -812.378735  
 Sum of electronic and thermal Free Energies= -812.453751

aa-1+4a5a.log

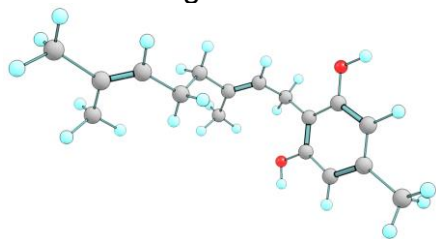

43 Atoms

|                |           |           |           |
|----------------|-----------|-----------|-----------|
| C              | 2.986712  | 0.006116  | 1.237682  |
| C              | 3.807834  | -1.088912 | 0.949204  |
| C              | 4.035674  | -1.464992 | -0.37834  |
| C              | 3.426894  | -0.733213 | -1.401997 |
| C              | 2.607813  | 0.360406  | -1.097525 |
| C              | 2.37606   | 0.762289  | 0.225948  |
| H              | 4.264174  | -1.648824 | 1.762141  |
| H              | 3.584877  | -1.012741 | -2.440941 |
| O              | 2.730747  | 0.395712  | 2.527143  |
| H              | 3.207877  | -0.184123 | 3.13645   |
| O              | 1.995825  | 1.091227  | -2.083086 |
| H              | 2.232383  | 0.725022  | -2.946107 |
| C              | 1.459973  | 1.924445  | 0.560022  |
| C              | 0.07174   | 1.449766  | 0.928558  |
| H              | 1.431788  | 2.616868  | -0.282325 |
| H              | 1.88428   | 2.467161  | 1.412578  |
| C              | -1.055759 | 1.560211  | 0.210354  |
| H              | 0.019234  | 0.933162  | 1.887147  |
| C              | -2.353676 | 0.976126  | 0.731931  |
| H              | -2.296352 | 0.832907  | 1.817572  |
| H              | -3.179102 | 1.677607  | 0.548648  |
| C              | -2.714942 | -0.379833 | 0.071979  |
| C              | -4.001576 | -0.946906 | 0.606909  |
| H              | -1.893197 | -1.079981 | 0.274239  |
| H              | -2.754962 | -0.259187 | -1.014511 |
| C              | -5.188719 | -1.040018 | -0.012728 |
| H              | -3.948154 | -1.289316 | 1.641948  |
| C              | -6.392225 | -1.619861 | 0.692078  |
| H              | -7.212001 | -0.890239 | 0.732439  |
| H              | -6.78213  | -2.491166 | 0.149076  |
| H              | -6.161556 | -1.930767 | 1.715099  |
| C              | -1.149538 | 2.228648  | -1.141265 |
| H              | -1.723206 | 1.608236  | -1.84005  |
| H              | -0.174683 | 2.413455  | -1.593542 |
| H              | -1.689025 | 3.182042  | -1.062715 |
| C              | -5.457845 | -0.59501  | -1.429757 |
| H              | -5.815253 | -1.436795 | -2.037196 |
| H              | -4.584684 | -0.167188 | -1.925558 |
| H              | -6.256558 | 0.157922  | -1.446523 |
| C              | 4.949402  | -2.623912 | -0.700673 |
| H              | 4.680056  | -3.093689 | -1.651046 |
| H              | 4.915903  | -3.38833  | 0.081253  |
| Frequencies -- | 13.5110   | 15.5528   | 26.1841   |
| Frequencies -- | 35.8044   | 53.3847   | 61.1881   |
| Frequencies -- | 66.0523   | 90.3954   | 105.8967  |

Zero-point correction= 0.372481 (Hartree/Particle)  
 Thermal correction to Energy= 0.394223  
 Thermal correction to Enthalpy= 0.395167  
 Thermal correction to Gibbs Free Energy= 0.318319  
 Sum of electronic and zero-point Energies= -812.400265  
 Sum of electronic and thermal Energies= -812.378523  
 Sum of electronic and thermal Enthalpies= -812.377579  
 Sum of electronic and thermal Free Energies= -812.454427

Cannabigerocin-AA-1a3t

aa-1a4+5-.log

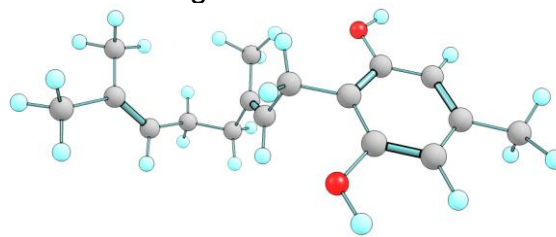

43 Atoms

|   |           |           |           |
|---|-----------|-----------|-----------|
| C | 2.589353  | 1.363426  | -0.094395 |
| C | 3.942341  | 1.29092   | 0.254169  |
| C | 4.6262    | 0.074704  | 0.16468   |
| C | 3.937241  | -1.056778 | -0.282114 |
| C | 2.583522  | -0.968526 | -0.626252 |
| C | 1.88034   | 0.242856  | -0.552112 |
| H | 4.457959  | 2.18411   | 0.598606  |
| H | 4.450626  | -2.01213  | -0.361344 |
| O | 1.885718  | 2.537295  | -0.009671 |
| H | 2.473386  | 3.239762  | 0.300769  |
| O | 1.88452   | -2.064072 | -1.063952 |
| H | 2.470278  | -2.833249 | -1.077178 |
| C | 0.409083  | 0.334925  | -0.908712 |
| C | -0.475445 | 0.250136  | 0.315124  |
| H | 0.161066  | -0.445094 | -1.629693 |
| H | 0.231696  | 1.298243  | -1.401194 |
| C | -1.303335 | -0.746199 | 0.662096  |
| H | -0.397267 | 1.1095    | 0.980683  |
| C | -2.136331 | -0.650266 | 1.922775  |
| H | -1.9086   | -1.504357 | 2.577115  |
| H | -1.869293 | 0.256202  | 2.479418  |
| C | -3.664319 | -0.644218 | 1.658713  |
| C | -4.096508 | 0.548016  | 0.850425  |
| H | -4.172031 | -0.627525 | 2.633522  |
| H | -3.955978 | -1.582921 | 1.179008  |
| C | -4.702751 | 0.575997  | -0.346269 |
| H | -3.848488 | 1.50811   | 1.307445  |
| C | -5.033866 | 1.887048  | -1.019521 |
| H | -4.544427 | 1.956536  | -2.000192 |
| H | -6.112603 | 1.972587  | -1.206973 |
| H | -4.721922 | 2.748255  | -0.421719 |
| C | -1.501329 | -2.005367 | -0.151515 |
| H | -1.615268 | -2.872192 | 0.510784  |
| H | -0.663462 | -2.205315 | -0.821118 |
| H | -2.417637 | -1.949935 | -0.752398 |
| C | -5.108888 | -0.642704 | -1.138772 |
| H | -6.186812 | -0.625329 | -1.346202 |
| H | -4.879349 | -1.584501 | -0.637426 |
| H | -4.606837 | -0.64841  | -2.1151   |
| C | 6.075985  | -0.023235 | 0.577267  |
| H | 6.600887  | -0.799507 | 0.01277   |
| H | 6.164127  | -0.277788 | 1.640634  |
| H | 6.600278  | 0.924754  | 0.425231  |

Frequencies -- 16.4983 22.7576 34.4854  
 Frequencies -- 36.8560 46.5817 49.8951  
 Frequencies -- 79.4422 112.1828 132.5979

Zero-point correction= 0.372946 (Hartree/Particle)  
 Thermal correction to Energy= 0.394351  
 Thermal correction to Enthalpy= 0.395295  
 Thermal correction to Gibbs Free Energy= 0.320262  
 Sum of electronic and zero-point Energies= -812.401083  
 Sum of electronic and thermal Energies= -812.379679  
 Sum of electronic and thermal Enthalpies= -812.378735  
 Sum of electronic and thermal Free Energies= -812.453767

aa-1a4+5+.log

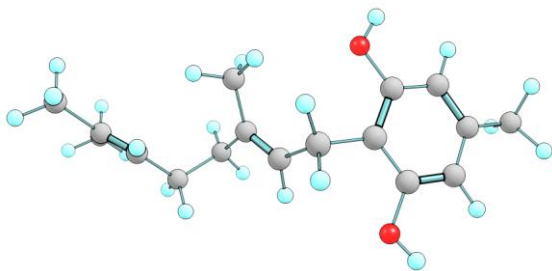

43 Atoms

|   |           |           |           |
|---|-----------|-----------|-----------|
| C | -3.031624 | -1.180042 | -0.493986 |
| C | -4.29936  | -1.062637 | 0.086243  |
| C | -4.7655   | 0.186529  | 0.507305  |
| C | -3.948132 | 1.307294  | 0.332673  |
| C | -2.681957 | 1.173923  | -0.248807 |
| C | -2.198162 | -0.068228 | -0.685552 |
| H | -4.917854 | -1.948143 | 0.212809  |
| H | -4.292427 | 2.288444  | 0.651063  |
| O | -2.53808  | -2.390565 | -0.90805  |
| H | -3.198119 | -3.077471 | -0.742086 |
| O | -1.858851 | 2.255242  | -0.428408 |
| H | -2.299853 | 3.050399  | -0.099495 |
| C | -0.816352 | -0.216861 | -1.293433 |
| C | 0.204254  | -0.650972 | -0.265012 |
| H | -0.527446 | 0.723164  | -1.765581 |
| H | -0.864255 | -0.976012 | -2.082554 |
| C | 1.199227  | 0.071209  | 0.272069  |
| H | 0.075671  | -1.677033 | 0.081865  |
| C | 2.144412  | -0.575355 | 1.272864  |
| H | 2.562322  | 0.191902  | 1.936341  |
| H | 1.591075  | -1.278982 | 1.906547  |
| C | 3.320603  | -1.351209 | 0.618018  |
| C | 4.168521  | -0.517993 | -0.306032 |
| H | 2.891716  | -2.18561  | 0.047796  |
| H | 3.924771  | -1.795982 | 1.415793  |
| C | 5.368146  | 0.031192  | -0.057371 |
| H | 3.723755  | -0.326922 | -1.282906 |
| C | 6.074794  | 0.863637  | -1.100585 |
| H | 6.263809  | 1.879423  | -0.728584 |
| H | 7.056935  | 0.43708   | -1.344642 |
| H | 5.496702  | 0.941711  | -2.025878 |
| C | 1.483232  | 1.518424  | -0.047965 |
| H | 1.413655  | 2.120007  | 0.867952  |
| H | 0.787998  | 1.943966  | -0.772071 |
| H | 2.50752   | 1.640505  | -0.418728 |
| C | 6.12175   | -0.104825 | 1.243     |
| H | 7.111871  | -0.547018 | 1.071455  |
| H | 5.601988  | -0.713788 | 1.984986  |
| H | 6.29858   | 0.884288  | 1.685307  |
| C | -6.115675 | 0.318102  | 1.171899  |
| H | -6.561703 | 1.298478  | 0.980348  |
| H | -6.029118 | 0.206534  | 2.259725  |

|                |         |         |          |
|----------------|---------|---------|----------|
| Frequencies -- | 12.6379 | 17.4308 | 23.5160  |
| Frequencies -- | 36.7219 | 39.4785 | 50.7282  |
| Frequencies -- | 92.3026 | 97.2755 | 109.8182 |

|                                              |             |                    |
|----------------------------------------------|-------------|--------------------|
| Zero-point correction=                       | 0.372644    | (Hartree/Particle) |
| Thermal correction to Energy=                | 0.394264    |                    |
| Thermal correction to Enthalpy=              | 0.395208    |                    |
| Thermal correction to Gibbs Free Energy=     | 0.318633    |                    |
| Sum of electronic and zero-point Energies=   | -812.398728 |                    |
| Sum of electronic and thermal Energies=      | -812.377108 |                    |
| Sum of electronic and thermal Enthalpies=    | -812.376164 |                    |
| Sum of electronic and thermal Free Energies= | -812.452738 |                    |

aa-1a4+5a.log

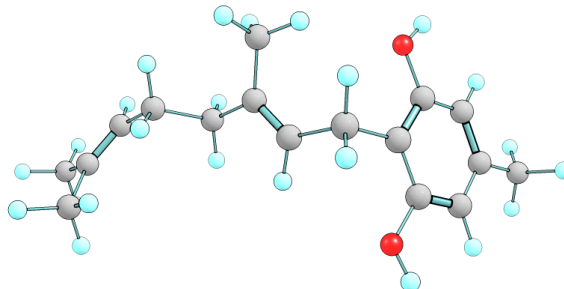

43 Atoms

|   |           |           |           |
|---|-----------|-----------|-----------|
| C | -2.833383 | -1.294326 | -0.588332 |
| C | -3.971278 | -1.598915 | 0.166855  |
| C | -4.659841 | -0.584896 | 0.839376  |
| C | -4.188429 | 0.728248  | 0.747318  |
| C | -3.048826 | 1.017111  | -0.011752 |
| C | -2.35138  | 0.017497  | -0.706085 |
| H | -4.313948 | -2.628825 | 0.23218   |
| H | -4.704378 | 1.530838  | 1.268991  |
| O | -2.126427 | -2.265536 | -1.249355 |
| H | -2.555492 | -3.121285 | -1.112431 |
| O | -2.562095 | 2.294802  | -0.114313 |
| H | -3.124944 | 2.893799  | 0.394913  |
| C | -1.099662 | 0.328334  | -1.503827 |
| C | 0.156017  | 0.083116  | -0.697375 |
| H | -1.144968 | 1.357781  | -1.861899 |
| H | -1.08105  | -0.320866 | -2.387121 |
| C | 1.037681  | 0.99117   | -0.252128 |
| H | 0.327859  | -0.964448 | -0.449808 |
| C | 2.257635  | 0.552552  | 0.530479  |
| H | 2.285216  | 1.083064  | 1.494058  |
| H | 2.196797  | -0.517212 | 0.760732  |
| C | 3.59289   | 0.819788  | -0.20923  |
| C | 4.784806  | 0.422377  | 0.618227  |
| H | 3.661622  | 1.890595  | -0.442526 |
| H | 3.571141  | 0.295045  | -1.169443 |
| H | 5.623704  | -0.608125 | 0.428425  |
| C | 4.950305  | 1.048114  | 1.497282  |
| C | 6.763274  | -0.870518 | 1.384546  |
| H | 6.682425  | -1.873381 | 1.824726  |
| H | 7.728671  | -0.840759 | 0.861764  |
| H | 6.794679  | -0.141769 | 2.199558  |
| C | 0.919486  | 2.479343  | -0.495178 |
| H | 1.235351  | 3.034998  | 0.39613   |
| H | -0.101295 | 2.782628  | -0.732263 |
| H | 1.574209  | 2.805952  | -1.313164 |
| C | 5.537231  | -1.590394 | -0.714249 |
| H | 6.462369  | -1.577143 | -1.305284 |
| H | 4.701797  | -1.398942 | -1.389859 |
| H | 5.432024  | -2.613226 | -0.329766 |
| C | -5.910113 | -0.896968 | 1.62744   |
| H | -6.025833 | -0.219189 | 2.478396  |
| H | -5.898923 | -1.923234 | 2.005763  |
| H | -6.804337 | -0.789028 | 1.001342  |

|                |         |         |          |
|----------------|---------|---------|----------|
| Frequencies -- | 20.7802 | 21.8944 | 30.3106  |
| Frequencies -- | 42.1737 | 50.6913 | 55.6465  |
| Frequencies -- | 71.2186 | 88.4438 | 119.8501 |

|                                              |             |                    |
|----------------------------------------------|-------------|--------------------|
| Zero-point correction=                       | 0.372624    | (Hartree/Particle) |
| Thermal correction to Energy=                | 0.394277    |                    |
| Thermal correction to Enthalpy=              | 0.395221    |                    |
| Thermal correction to Gibbs Free Energy=     | 0.319428    |                    |
| Sum of electronic and zero-point Energies=   | -812.400189 |                    |
| Sum of electronic and thermal Energies=      | -812.378536 |                    |
| Sum of electronic and thermal Enthalpies=    | -812.377592 |                    |
| Sum of electronic and thermal Free Energies= | -812.453386 |                    |

aa-1a4-5-.log

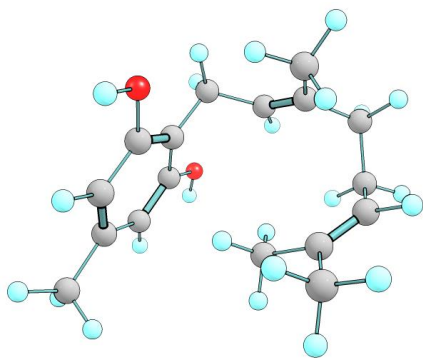

43 Atoms

|   |           |           |           |
|---|-----------|-----------|-----------|
| C | 1.737941  | -1.036749 | -1.061049 |
| C | 2.70539   | -0.038717 | -1.209473 |
| C | 3.127234  | 0.699926  | -0.099874 |
| C | 2.578579  | 0.40786   | 1.151605  |
| C | 1.614846  | -0.600386 | 1.284962  |
| C | 1.169543  | -1.345382 | 0.183994  |
| H | 3.119302  | 0.167614  | -2.193661 |
| H | 2.897516  | 0.96345   | 2.030224  |
| O | 1.28906   | -1.767251 | -2.130553 |
| H | 1.743182  | -1.471833 | -2.931571 |
| O | 1.075385  | -0.905912 | 2.508776  |
| H | 1.437348  | -0.30653  | 3.175513  |
| C | 0.088401  | -2.405356 | 0.302569  |
| C | -1.219464 | -1.962984 | -0.323309 |
| H | -0.046682 | -2.660742 | 1.354505  |
| H | 0.431087  | -3.312955 | -0.207949 |
| C | -2.247166 | -1.351819 | 0.283004  |
| H | -1.282306 | -2.117721 | -1.399631 |
| C | -3.444911 | -0.897526 | -0.536634 |
| H | -3.710771 | -1.66316  | -1.275294 |
| H | -4.317757 | -0.773601 | 0.116944  |
| C | -3.186667 | 0.431284  | -1.296711 |
| C | -2.87339  | 1.592183  | -0.39235  |
| H | -4.084013 | 0.665899  | -1.886698 |
| H | -2.376944 | 0.261158  | -2.012364 |
| C | -1.688593 | 2.195389  | -0.204656 |
| H | -3.719054 | 1.949541  | 0.198433  |
| C | -1.543563 | 3.335931  | 0.774754  |
| H | -0.811792 | 3.086134  | 1.554683  |
| H | -1.165383 | 4.238315  | 0.275798  |
| H | -2.490027 | 3.586735  | 1.262642  |
| C | -2.296604 | -1.007837 | 1.750333  |
| H | -2.488792 | 0.065603  | 1.865733  |
| H | -1.371814 | -1.239197 | 2.280476  |
| H | -3.128593 | -1.529657 | 2.242364  |
| C | -0.406776 | 1.818938  | -0.904243 |
| H | -0.017532 | 2.669539  | -1.480269 |
| H | -0.510149 | 0.965588  | -1.57443  |
| H | 0.36559   | 1.559728  | -0.17123  |
| C | 4.128163  | 1.81944   | -0.259414 |
| H | 4.700109  | 1.980409  | 0.658957  |
| H | 3.621745  | 2.762524  | -0.49918  |
| H | 4.832391  | 1.613294  | -1.070837 |

|                |         |          |          |
|----------------|---------|----------|----------|
| Frequencies -- | 22.6180 | 39.3784  | 49.5636  |
| Frequencies -- | 51.6668 | 72.2745  | 81.5849  |
| Frequencies -- | 94.6132 | 110.4758 | 135.2503 |

|                                              |                             |
|----------------------------------------------|-----------------------------|
| Zero-point correction=                       | 0.373414 (Hartree/Particle) |
| Thermal correction to Energy=                | 0.394476                    |
| Thermal correction to Enthalpy=              | 0.395420                    |
| Thermal correction to Gibbs Free Energy=     | 0.323536                    |
| Sum of electronic and zero-point Energies=   | -812.403957                 |
| Sum of electronic and thermal Energies=      | -812.382895                 |
| Sum of electronic and thermal Enthalpies=    | -812.381951                 |
| Sum of electronic and thermal Free Energies= | -812.453835                 |

aa-1a4-5+.log

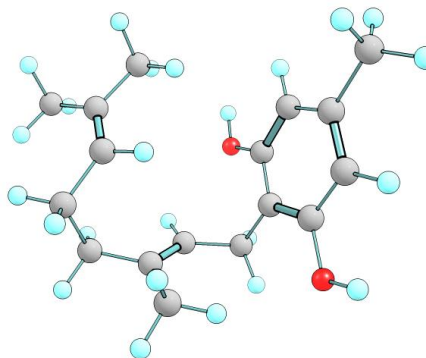

43 Atoms

|   |           |           |           |
|---|-----------|-----------|-----------|
| C | -1.273981 | 0.668148  | 1.129891  |
| C | -1.976191 | 1.675583  | 0.461645  |
| C | -2.912913 | 1.344951  | -0.523753 |
| C | -3.141143 | -0.002565 | -0.80938  |
| C | -2.433003 | -1.00154  | -0.128105 |
| C | -1.474952 | -0.693035 | 0.848009  |
| H | -1.79359  | 2.716923  | 0.71512   |
| O | -3.874136 | -0.283917 | -1.561786 |
| H | -0.352041 | 0.958917  | 2.100788  |
| H | -0.26885  | 1.918569  | 2.184084  |
| O | -2.657745 | -2.329998 | -0.389015 |
| H | -3.297782 | -2.409368 | -1.109297 |
| C | -0.652454 | -1.7611   | 1.549612  |
| C | 0.820477  | -1.667484 | 1.195952  |
| H | -1.057643 | -2.742485 | 1.29524   |
| H | -0.762449 | -1.641242 | 2.633204  |
| C | 1.403429  | -2.089481 | 0.064575  |
| H | 1.432528  | -1.117366 | 1.906966  |
| C | 2.856826  | -1.762877 | -0.205638 |
| H | 3.338576  | -1.429067 | 0.720319  |
| C | 3.393409  | -2.658765 | -0.548941 |
| C | 3.032906  | -0.644035 | -1.273209 |
| C | 2.228305  | 0.585839  | -0.94366  |
| H | 2.716534  | -1.029934 | -2.250476 |
| H | 4.100209  | -0.418167 | -1.364484 |
| C | 2.64503   | 1.71044   | -0.342568 |
| H | 1.164785  | 0.507566  | -1.16713  |
| C | 1.674708  | 2.822626  | -0.021997 |
| H | 1.659975  | 3.02414   | 1.058054  |
| H | 1.975136  | 3.762797  | -0.503409 |
| H | 0.655954  | 2.583369  | -0.339368 |
| C | 0.674357  | -2.798275 | -1.049716 |
| H | 0.645481  | -2.170909 | -1.950508 |
| H | -0.357595 | -3.045927 | -0.798148 |
| H | 1.200538  | -3.719269 | -1.332334 |
| C | 4.066303  | 1.978851  | 0.086861  |
| H | 4.44411   | 2.900697  | -0.374593 |
| H | 4.754251  | 1.168671  | -0.162486 |
| H | 4.113015  | 2.136041  | 1.172531  |
| C | -3.641671 | 2.42902   | -1.281907 |
| H | -4.599094 | 2.071399  | -1.671361 |
| H | -3.048126 | 2.774514  | -2.13721  |

|                |         |          |          |
|----------------|---------|----------|----------|
| Frequencies -- | 15.1323 | 23.4531  | 29.5245  |
| Frequencies -- | 40.8603 | 74.0035  | 75.7047  |
| Frequencies -- | 91.3707 | 109.5558 | 123.5545 |

|                                              |                             |
|----------------------------------------------|-----------------------------|
| Zero-point correction=                       | 0.372941 (Hartree/Particle) |
| Thermal correction to Energy=                | 0.394297                    |
| Thermal correction to Enthalpy=              | 0.395241                    |
| Thermal correction to Gibbs Free Energy=     | 0.321150                    |
| Sum of electronic and zero-point Energies=   | -812.403232                 |
| Sum of electronic and thermal Energies=      | -812.381875                 |
| Sum of electronic and thermal Enthalpies=    | -812.380931                 |
| Sum of electronic and thermal Free Energies= | -812.455023                 |

aa-1a4-5a.log

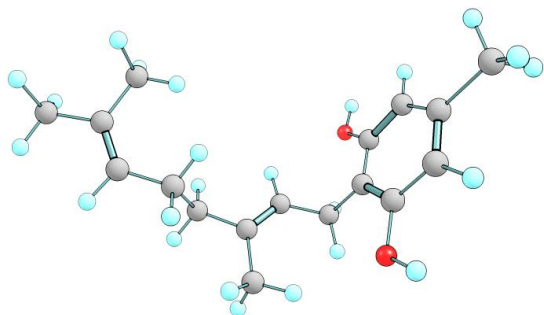

43 Atoms

|   |           |           |           |
|---|-----------|-----------|-----------|
| C | 2.51051   | -0.594895 | 1.245417  |
| C | 3.256237  | -1.621262 | 0.656994  |
| C | 3.732748  | -1.481972 | -0.650581 |
| C | 3.446777  | -0.307417 | -1.35191  |
| C | 2.698573  | 0.711225  | -0.749362 |
| C | 2.219394  | 0.596403  | 0.563384  |
| H | 3.459131  | -2.529766 | 1.219243  |
| H | 3.80209   | -0.180703 | -2.37191  |
| O | 2.019629  | -0.700303 | 2.521367  |
| H | 2.285023  | -1.551251 | 2.896242  |
| O | 2.403719  | 1.871228  | -1.418774 |
| H | 2.790538  | 1.836386  | -2.304155 |
| C | 1.376011  | 1.680818  | 1.207267  |
| C | -0.097622 | 1.340248  | 1.166998  |
| H | 1.575917  | 2.633583  | 0.71544   |
| H | 1.683577  | 1.784691  | 2.254366  |
| C | -1.047004 | 1.879934  | 0.387976  |
| H | -0.386445 | 0.533718  | 1.840833  |
| C | -2.471643 | 1.367274  | 0.460729  |
| H | -2.639808 | 0.842582  | 1.408038  |
| H | -3.173299 | 2.213285  | 0.439087  |
| C | -2.825422 | 0.398838  | -0.697332 |
| C | -4.266636 | -0.031297 | -0.658258 |
| H | -2.144278 | -0.456342 | -0.650714 |
| H | -2.627455 | 0.898709  | -1.654807 |
| C | -4.765812 | -1.223714 | -0.296439 |
| H | -4.979039 | 0.749715  | -0.930147 |
| C | -6.254684 | -1.47711  | -0.293045 |
| H | -6.511811 | -2.312331 | -0.95819  |
| H | -6.601185 | -1.763548 | 0.708904  |
| H | -6.823661 | -0.59939  | -0.612836 |
| C | -0.808317 | 2.985538  | -0.613325 |
| H | -1.290238 | 2.750497  | -1.569814 |
| H | 0.249775  | 3.156663  | -0.81469  |
| H | -1.258506 | 3.924848  | -0.265154 |
| C | -3.935422 | -2.407994 | 0.13498   |
| H | -4.229781 | -2.732191 | 1.141614  |
| H | -2.863158 | -2.20486  | 0.149309  |
| H | -4.110915 | -3.265143 | -0.528275 |
| C | 4.569173  | -2.570367 | -1.280964 |
| H | 4.49495   | -2.551288 | -2.372024 |
| H | 4.262343  | -3.561548 | -0.933811 |

|                |         |         |          |
|----------------|---------|---------|----------|
| Frequencies -- | 14.3904 | 17.5474 | 24.8631  |
| Frequencies -- | 34.5154 | 57.2612 | 59.6850  |
| Frequencies -- | 70.5197 | 93.9059 | 111.4176 |

|                                              |                             |
|----------------------------------------------|-----------------------------|
| Zero-point correction=                       | 0.372544 (Hartree/Particle) |
| Thermal correction to Energy=                | 0.394256                    |
| Thermal correction to Enthalpy=              | 0.395201                    |
| Thermal correction to Gibbs Free Energy=     | 0.318632                    |
| Sum of electronic and zero-point Energies=   | -812.400321                 |
| Sum of electronic and thermal Energies=      | -812.378609                 |
| Sum of electronic and thermal Enthalpies=    | -812.377665                 |
| Sum of electronic and thermal Free Energies= | -812.454234                 |

aa-1a4a5-.log

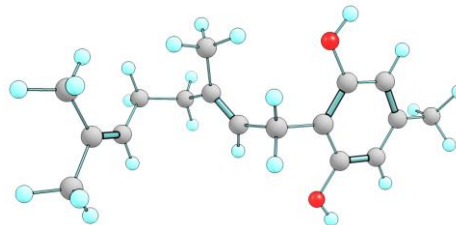

43 Atoms

|   |           |           |           |
|---|-----------|-----------|-----------|
| C | 2.589014  | 1.363454  | -0.094302 |
| C | 3.94199   | 1.29108   | 0.254353  |
| C | 4.625995  | 0.074947  | 0.164796  |
| C | 3.937202  | -1.056574 | -0.282139 |
| C | 2.583503  | -0.968452 | -0.626386 |
| C | 1.880166  | 0.242845  | -0.552176 |
| H | 4.457466  | 2.184298  | 0.598929  |
| H | 4.450704  | -2.011872 | -0.361342 |
| O | 1.885216  | 2.537222  | -0.009474 |
| H | 2.472901  | 3.239833  | 0.300614  |
| O | 1.884666  | -2.064065 | -1.064179 |
| H | 2.47059   | -2.833111 | -1.077669 |
| C | 0.408912  | 0.334789  | -0.90882  |
| C | -0.475643 | 0.249914  | 0.314997  |
| H | 0.160981  | -0.445237 | -1.629823 |
| H | 0.23145   | 1.29811   | -1.401276 |
| C | -1.303307 | -0.746577 | 0.66207   |
| H | -0.397655 | 1.109355  | 0.980482  |
| C | -2.136328 | -0.650683 | 1.922732  |
| H | -1.908714 | -1.504842 | 2.577025  |
| H | -1.869234 | 0.25572   | 2.47946   |
| C | -3.664314 | -0.644454 | 1.658629  |
| C | -4.096364 | 0.547963  | 0.850534  |
| H | -4.172044 | -0.627875 | 2.633431  |
| H | -3.956059 | -1.583045 | 1.178759  |
| C | -4.702392 | 0.576208  | -0.346262 |
| H | -3.848431 | 1.507955  | 1.307819  |
| C | -5.033425 | 1.887406  | -1.019271 |
| H | -4.543739 | 1.957157  | -1.9998   |
| H | -6.112121 | 1.972932  | -1.206973 |
| H | -4.721677 | 2.748481  | -0.421174 |
| C | -1.501005 | -2.005896 | -0.151372 |
| H | -1.61418  | -2.872726 | 0.511056  |
| H | -0.663354 | -2.20547  | -0.821354 |
| H | -2.417628 | -1.950996 | -0.751829 |
| C | -5.108401 | -0.64232  | -1.1391   |
| H | -6.18632  | -0.624975 | -1.34657  |
| H | -4.87881  | -1.584232 | -0.637991 |
| H | -4.6063   | -0.647725 | -2.115404 |
| C | 6.075798  | -0.022892 | 0.57738   |
| H | 6.60115   | -0.797945 | 0.011617  |
| H | 6.163967  | -0.27921  | 1.640317  |
| H | 6.599596  | 0.925619  | 0.426938  |

|                |         |          |          |
|----------------|---------|----------|----------|
| Frequencies -- | 16.5841 | 22.8221  | 34.5217  |
| Frequencies -- | 37.3261 | 46.5867  | 49.9251  |
| Frequencies -- | 79.4833 | 112.1526 | 132.5897 |

|                                              |                             |
|----------------------------------------------|-----------------------------|
| Zero-point correction=                       | 0.372947 (Hartree/Particle) |
| Thermal correction to Energy=                | 0.394350                    |
| Thermal correction to Enthalpy=              | 0.395295                    |
| Thermal correction to Gibbs Free Energy=     | 0.320284                    |
| Sum of electronic and zero-point Energies=   | -812.401082                 |
| Sum of electronic and thermal Energies=      | -812.379679                 |
| Sum of electronic and thermal Enthalpies=    | -812.378735                 |
| Sum of electronic and thermal Free Energies= | -812.453746                 |



aa-1a4a5+.log

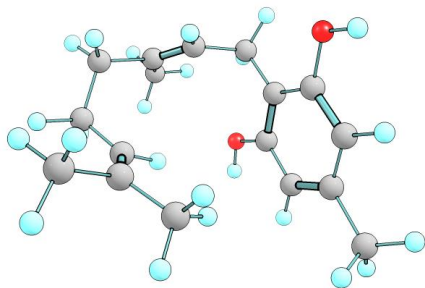

43 Atoms

|   |           |           |           |
|---|-----------|-----------|-----------|
| C | -2.036289 | -0.849391 | 1.192336  |
| C | -3.009537 | 0.096495  | 0.847283  |
| C | -3.113023 | 0.550874  | -0.469843 |
| C | -2.237788 | 0.037764  | -1.432677 |
| C | -1.267618 | -0.90273  | -1.071456 |
| C | -1.153066 | -1.382077 | 0.242339  |
| H | -3.677507 | 0.483548  | 1.613174  |
| H | -2.299846 | 0.377785  | -2.463708 |
| O | -1.897164 | -1.294931 | 2.48138   |
| H | -2.55918  | -0.864246 | 3.039238  |
| O | -0.374926 | -1.398923 | -1.984436 |
| H | -0.537945 | -0.989378 | -2.845028 |
| C | -0.049874 | -2.350808 | 0.629463  |
| C | 1.208266  | -1.567085 | 0.92126   |
| H | 0.104285  | -3.06838  | -0.178814 |
| H | -0.363304 | -2.911159 | 1.515994  |
| C | 2.328927  | -1.491705 | 0.188524  |
| H | 1.12045   | -0.902863 | 1.781487  |
| C | 3.37266   | -0.445672 | 0.520338  |
| H | 3.212312  | -0.06959  | 1.537032  |
| H | 4.38203   | -0.87908  | 0.486948  |
| C | 3.320985  | 0.765772  | -0.456851 |
| C | 1.935918  | 1.349717  | -0.565676 |
| H | 3.651089  | 0.436117  | -1.450253 |
| H | 4.051197  | 1.510069  | -0.12324  |
| C | 1.442596  | 2.423666  | 0.06989   |
| H | 1.249492  | 0.775386  | -1.18681  |
| C | -0.002286 | 2.830487  | -0.098415 |
| H | -0.525459 | 2.813347  | 0.867308  |
| H | -0.082839 | 3.859264  | -0.47492  |
| H | -0.541471 | 2.166581  | -0.779166 |
| C | 2.608048  | -2.310824 | -1.046485 |
| H | 2.687067  | -1.666969 | -1.930693 |
| H | 1.833822  | -3.049763 | -1.253679 |
| H | 3.569164  | -2.832319 | -0.949812 |
| C | 2.232099  | 3.30207   | 1.009434  |
| H | 2.213013  | 4.346918  | 0.67245   |
| H | 3.275785  | 2.998759  | 1.113231  |
| H | 1.779458  | 3.293042  | 2.009791  |
| C | -4.11912  | 1.614153  | -0.840354 |
| H | -4.470226 | 1.492408  | -1.869375 |
| H | -3.671934 | 2.613061  | -0.764955 |

Frequencies -- 24.7289 32.8368 37.3697  
 Frequencies -- 52.0213 52.4122 72.8519  
 Frequencies -- 86.1130 103.4532 111.6132

Zero-point correction= 0.373067 (Hartree/Particle)  
 Thermal correction to Energy= 0.394383  
 Thermal correction to Enthalpy= 0.395327  
 Thermal correction to Gibbs Free Energy= 0.321964  
 Sum of electronic and zero-point Energies= -812.403750  
 Sum of electronic and thermal Energies= -812.382434  
 Sum of electronic and thermal Enthalpies= -812.381490  
 Sum of electronic and thermal Free Energies= -812.454853

aa-1a4a5a.log

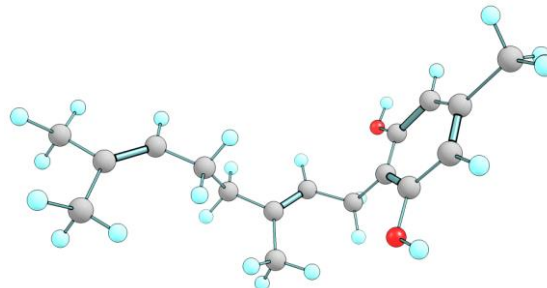

43 Atoms

|   |           |           |           |
|---|-----------|-----------|-----------|
| C | -2.97832  | 0.010011  | 1.240877  |
| C | -3.805311 | 1.098654  | 0.943578  |
| C | -4.042648 | 1.456834  | -0.386937 |
| C | -3.446301 | 0.707197  | -1.40537  |
| C | -2.621322 | -0.379115 | -1.092222 |
| C | -2.375459 | -0.759891 | 0.235234  |
| H | -4.259331 | 1.666425  | 1.752299  |
| H | -3.619615 | 0.967089  | -2.447013 |
| O | -2.715755 | -0.364104 | 2.533592  |
| H | -3.188958 | 0.223609  | 3.138405  |
| O | -2.023383 | -1.128507 | -2.072546 |
| H | -2.269249 | -0.776322 | -2.938784 |
| C | -1.462022 | -1.921513 | 0.578415  |
| C | -0.071815 | -1.447867 | 0.941166  |
| H | -1.436882 | -2.621403 | -0.257799 |
| H | -1.886483 | -2.455558 | 1.43639   |
| C | 1.052683  | -1.561025 | 0.218693  |
| H | -0.014945 | -0.929876 | 1.898707  |
| C | 2.35367   | -0.978704 | 0.734546  |
| H | 2.301473  | -0.835786 | 1.820482  |
| H | 3.177323  | -1.681203 | 0.547278  |
| C | 2.71362   | 0.377013  | 0.07345   |
| C | 4.00342   | 0.942049  | 0.602829  |
| H | 1.893707  | 1.078114  | 0.279889  |
| H | 2.748394  | 0.256805  | -1.013275 |
| H | 5.187026  | 1.037409  | -0.023179 |
| C | 3.955898  | 1.280798  | 1.639367  |
| C | 6.394545  | 1.614557  | 0.676978  |
| H | 7.214479  | 0.884736  | 0.709854  |
| H | 6.781403  | 2.487914  | 0.135098  |
| H | 6.169732  | 1.92156   | 1.702475  |
| C | 1.139715  | -2.230699 | -1.132784 |
| H | 1.712751  | -1.612363 | -1.833942 |
| H | 0.162655  | -2.412904 | -1.58141  |
| H | 1.676708  | -3.185622 | -1.055653 |
| C | 5.448164  | 0.597804  | -1.443388 |
| H | 5.801507  | 1.44209   | -2.049735 |
| H | 4.572395  | 0.171313  | -1.935722 |
| H | 6.247233  | -0.154543 | -1.46762  |
| C | -4.900765 | 2.65467   | -0.719426 |
| H | -5.425714 | 2.518624  | -1.669613 |
| H | -4.289272 | 3.560598  | -0.812341 |

Frequencies -- 9.1810 16.1652 27.2878  
 Frequencies -- 35.8744 48.3802 53.3949  
 Frequencies -- 66.5354 90.1495 106.8597

Zero-point correction= 0.372473 (Hartree/Particle)  
 Thermal correction to Energy= 0.394238  
 Thermal correction to Enthalpy= 0.395183  
 Thermal correction to Gibbs Free Energy= 0.317854  
 Sum of electronic and zero-point Energies= -812.400275  
 Sum of electronic and thermal Energies= -812.378510  
 Sum of electronic and thermal Enthalpies= -812.377565  
 Sum of electronic and thermal Free Energies= -812.454894

# Cannabigerocin-AA-1-3t

aa-1-4+5-.log

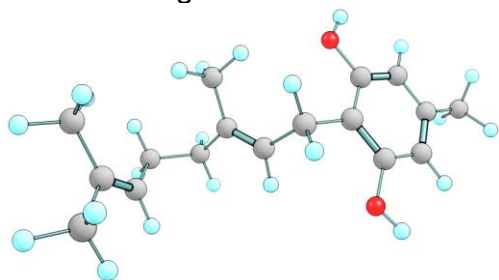

43 Atoms

|   |           |           |           |
|---|-----------|-----------|-----------|
| C | 2.583582  | -0.968437 | -0.62612  |
| C | 3.937341  | -1.05669  | -0.282106 |
| C | 4.626329  | 0.074785  | 0.164645  |
| C | 3.942462  | 1.290995  | 0.254261  |
| C | 2.589438  | 1.363498  | -0.094155 |
| C | 1.880399  | 0.242938  | -0.551876 |
| H | 4.450723  | -2.012042 | -0.361386 |
| H | 4.458102  | 2.184171  | 0.598711  |
| O | 1.884539  | -2.063978 | -1.06375  |
| H | 2.470391  | -2.833078 | -1.077392 |
| O | 1.885778  | 2.537339  | -0.009225 |
| H | 2.473576  | 3.239879  | 0.300808  |
| C | 0.409126  | 0.334989  | -0.908388 |
| C | -0.475382 | 0.249502  | 0.315411  |
| H | 0.161194  | -0.444716 | -1.629747 |
| H | 0.231605  | 1.29853   | -1.400391 |
| C | -1.303489 | -0.746896 | 0.661684  |
| H | -0.397007 | 1.10838   | 0.981582  |
| C | -2.136502 | -0.651666 | 1.922395  |
| H | -1.909036 | -1.506279 | 2.576148  |
| H | -1.869276 | 0.254338  | 2.47971   |
| C | -3.664478 | -0.645072 | 1.658242  |
| C | -4.096348 | 0.547749  | 0.850646  |
| H | -4.17225  | -0.628871 | 2.63303   |
| H | -3.956329 | -1.583405 | 1.17793   |
| C | -4.702707 | 0.576552  | -0.345969 |
| H | -3.847991 | 1.50752   | 1.308165  |
| C | -5.033462 | 1.888064  | -1.018509 |
| H | -4.543842 | 1.958016  | -1.999059 |
| H | -6.112152 | 1.973926  | -1.206088 |
| H | -4.721442 | 2.748862  | -0.420155 |
| C | -1.501783 | -2.005418 | -0.152853 |
| H | -1.616016 | -2.872699 | 0.508796  |
| H | -0.66394  | -2.205106 | -0.822567 |
| H | -2.418036 | -1.949257 | -0.753761 |
| C | -5.109352 | -0.641596 | -1.139071 |
| H | -6.187383 | -0.623979 | -1.345938 |
| H | -4.879652 | -1.583752 | -0.638466 |
| H | -4.607791 | -0.646702 | -2.115655 |
| C | 6.076177  | -0.023085 | 0.577048  |
| H | 6.600919  | 0.924313  | 0.422842  |
| H | 6.600502  | -0.800815 | 0.014031  |

|                |         |          |          |
|----------------|---------|----------|----------|
| Frequencies -- | 16.5387 | 22.7584  | 34.4658  |
| Frequencies -- | 36.4308 | 46.6298  | 49.9158  |
| Frequencies -- | 79.4434 | 112.2214 | 132.6667 |

|                                              |                             |
|----------------------------------------------|-----------------------------|
| Zero-point correction=                       | 0.372946 (Hartree/Particle) |
| Thermal correction to Energy=                | 0.394350                    |
| Thermal correction to Enthalpy=              | 0.395295                    |
| Thermal correction to Gibbs Free Energy=     | 0.320256                    |
| Sum of electronic and zero-point Energies=   | -812.401084                 |
| Sum of electronic and thermal Energies=      | -812.379679                 |
| Sum of electronic and thermal Enthalpies=    | -812.378735                 |
| Sum of electronic and thermal Free Energies= | -812.453773                 |

# aa-1-4+5+.log

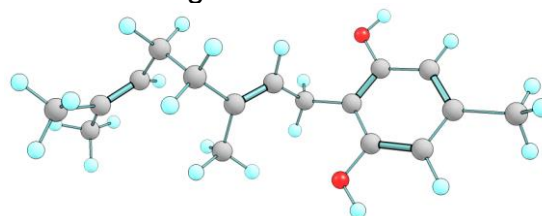

43 Atoms

|   |           |           |           |
|---|-----------|-----------|-----------|
| C | -2.618654 | 1.129321  | 0.091645  |
| C | -3.896725 | 1.20469   | 0.65371   |
| C | -4.77715  | 0.122468  | 0.547049  |
| C | -4.358472 | -1.025385 | -0.130469 |
| C | -3.076933 | -1.084228 | -0.692354 |
| C | -2.183565 | -0.007569 | -0.60806  |
| H | -4.203021 | 2.107032  | 1.177745  |
| H | -5.023982 | -1.880698 | -0.218974 |
| O | -1.7303   | 2.169225  | 0.184022  |
| H | -2.142916 | 2.901253  | 0.662358  |
| O | -2.631564 | -2.203981 | -1.347018 |
| H | -3.357658 | -2.838133 | -1.423252 |
| C | -0.788498 | -0.076227 | -1.195639 |
| C | 0.218491  | -0.599888 | -0.197925 |
| H | -0.501898 | 0.914398  | -1.554217 |
| H | -0.804969 | -0.741979 | -2.06637  |
| C | 1.317739  | 0.022567  | 0.255778  |
| H | -0.006999 | -1.595934 | 0.185932  |
| C | 2.254807  | -0.702602 | 1.206367  |
| H | 2.720101  | 0.017956  | 1.889692  |
| H | 1.683967  | -1.406304 | 1.824305  |
| C | 3.378857  | -1.497202 | 0.485444  |
| C | 4.242644  | -0.66108  | -0.428573 |
| H | 2.898642  | -2.288732 | -0.101067 |
| C | 3.992991  | -1.998069 | 1.244306  |
| H | 5.266848  | 0.093928  | -0.06448  |
| H | 3.968586  | -0.66786  | -1.4828   |
| C | 6.03078   | 0.92095   | -1.067774 |
| H | 5.90459   | 1.99258   | -0.862519 |
| H | 7.108657  | 0.720112  | -1.007368 |
| H | 5.704074  | 0.730555  | -2.094301 |
| C | 1.714308  | 1.421202  | -0.171787 |
| H | 2.332844  | 1.899393  | 0.594016  |
| H | 0.838684  | 2.052562  | -0.342701 |
| H | 2.313875  | 1.408207  | -1.089774 |
| C | 5.779307  | 0.17182   | 1.355215  |
| H | 6.620441  | -0.519843 | 1.500105  |
| H | 5.01753   | -0.073281 | 2.098858  |
| H | 6.157593  | 1.175595  | 1.578586  |
| C | -6.143497 | 0.185609  | 1.188175  |
| H | -6.823643 | -0.554343 | 0.757421  |
| H | -6.594364 | 1.175739  | 1.068196  |

|                |         |         |          |
|----------------|---------|---------|----------|
| Frequencies -- | 12.6454 | 17.4160 | 23.5254  |
| Frequencies -- | 36.7194 | 39.4931 | 50.7008  |
| Frequencies -- | 92.3118 | 97.2815 | 109.8432 |

|                                              |                             |
|----------------------------------------------|-----------------------------|
| Zero-point correction=                       | 0.372644 (Hartree/Particle) |
| Thermal correction to Energy=                | 0.394264                    |
| Thermal correction to Enthalpy=              | 0.395208                    |
| Thermal correction to Gibbs Free Energy=     | 0.318634                    |
| Sum of electronic and zero-point Energies=   | -812.398728                 |
| Sum of electronic and thermal Energies=      | -812.377108                 |
| Sum of electronic and thermal Enthalpies=    | -812.376164                 |
| Sum of electronic and thermal Free Energies= | -812.452738                 |

aa-1-4+5a.log

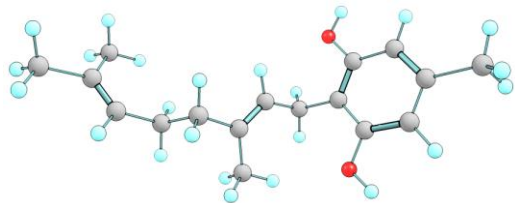

43 Atoms

|   |           |           |           |
|---|-----------|-----------|-----------|
| C | 3.072716  | 0.971143  | -0.021362 |
| C | 4.209079  | 0.648779  | -0.768927 |
| C | 4.663857  | -0.673641 | -0.826193 |
| C | 3.965302  | -1.658976 | -0.125021 |
| C | 2.82871   | -1.320278 | 0.620296  |
| C | 2.362149  | -0.001534 | 0.700249  |
| H | 4.737529  | 1.430499  | -1.309675 |
| H | 4.297281  | -2.69376  | -0.158543 |
| O | 2.60162   | 2.256869  | 0.049074  |
| H | 3.168403  | 2.834942  | -0.479629 |
| O | 2.113357  | -2.265161 | 1.309909  |
| H | 2.532253  | -3.129128 | 1.194906  |
| C | 1.115715  | 0.347452  | 1.490416  |
| C | -0.143781 | 0.097253  | 0.691528  |
| H | 1.174927  | 1.385538  | 1.820406  |
| H | 1.089293  | -0.277258 | 2.391025  |
| C | -1.01593  | 1.004501  | 0.226131  |
| H | -0.32778  | -0.953914 | 0.469205  |
| C | -2.242064 | 0.561575  | -0.544207 |
| H | -2.262437 | 1.065615  | -1.522094 |
| H | -2.196247 | -0.514908 | -0.744795 |
| C | -3.573185 | 0.867912  | 0.187615  |
| C | -4.771056 | 0.465795  | -0.629579 |
| H | -3.626187 | 1.94549   | 0.392173  |
| H | -3.559061 | 0.368934  | 1.161422  |
| C | -5.631135 | -0.550231 | -0.411718 |
| H | -4.925439 | 1.069556  | -1.525978 |
| C | -6.773899 | -0.820382 | -1.362276 |
| H | -6.708043 | -1.835634 | -1.775746 |
| H | -7.739282 | -0.762071 | -0.841881 |
| H | -6.793258 | -0.112995 | -2.19625  |
| C | -0.879893 | 2.496629  | 0.433619  |
| H | -1.19915  | 3.035137  | -0.466913 |
| H | 0.146535  | 2.794074  | 0.653327  |
| H | -1.52237  | 2.848891  | 1.250667  |
| C | -5.563977 | -1.50261  | 0.75779   |
| H | -6.487838 | -1.453413 | 1.348952  |
| H | -4.723964 | -1.31065  | 1.427283  |
| H | -5.481119 | -2.537643 | 0.401583  |
| C | 5.888789  | -1.019062 | -1.640089 |
| H | 6.133733  | -2.081858 | -1.567374 |
| H | 6.760601  | -0.447146 | -1.303292 |

|                |         |         |          |
|----------------|---------|---------|----------|
| Frequencies -- | 20.9632 | 22.1464 | 30.3184  |
| Frequencies -- | 42.3922 | 50.3685 | 61.2337  |
| Frequencies -- | 71.0713 | 88.6196 | 120.0543 |

|                                              |                             |
|----------------------------------------------|-----------------------------|
| Zero-point correction=                       | 0.372643 (Hartree/Particle) |
| Thermal correction to Energy=                | 0.394286                    |
| Thermal correction to Enthalpy=              | 0.395230                    |
| Thermal correction to Gibbs Free Energy=     | 0.319538                    |
| Sum of electronic and zero-point Energies=   | -812.400174                 |
| Sum of electronic and thermal Energies=      | -812.378532                 |
| Sum of electronic and thermal Enthalpies=    | -812.377587                 |
| Sum of electronic and thermal Free Energies= | -812.453279                 |

aa-1-4-5-.log

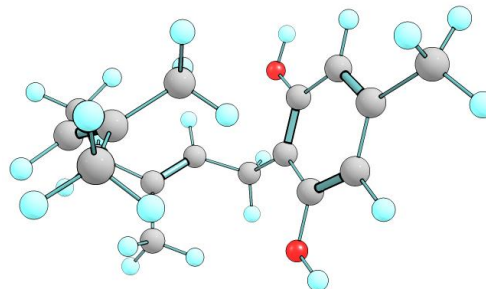

43 Atoms

|   |           |           |           |
|---|-----------|-----------|-----------|
| C | 1.614943  | -0.600518 | 1.284883  |
| C | 2.578646  | 0.407739  | 1.151604  |
| C | 3.127259  | 0.699942  | -0.099878 |
| C | 2.705379  | -0.038566 | -1.209524 |
| C | 1.737897  | -1.036593 | -1.061185 |
| C | 1.169553  | -1.345356 | 0.183828  |
| H | 2.897649  | 0.963206  | 2.030278  |
| H | 3.119265  | 0.167858  | -2.193697 |
| O | 1.075642  | -0.906326 | 2.508699  |
| H | 1.437269  | -0.306752 | 3.175447  |
| O | 1.288954  | -1.766948 | -2.130767 |
| H | 1.74295   | -1.471381 | -2.931805 |
| C | 0.088402  | -2.405322 | 0.302343  |
| C | -1.219477 | -1.962824 | -0.323401 |
| H | -0.046605 | -2.660865 | 1.354249  |
| H | 0.431033  | -3.312859 | -0.208325 |
| C | -2.247191 | -1.351795 | 0.283019  |
| H | -1.282343 | -2.117403 | -1.399745 |
| C | -3.444967 | -0.89747  | -0.536576 |
| H | -3.710917 | -1.663128 | -1.275177 |
| H | -4.317775 | -0.77348  | 0.117038  |
| C | -3.186674 | 0.431303  | -1.296677 |
| C | -2.873417 | 1.592137  | -0.392245 |
| H | -4.083985 | 0.665949  | -1.886709 |
| H | -2.376921 | 0.261166  | -2.012294 |
| C | -1.688667 | 2.195416  | -0.204551 |
| H | -3.71907  | 1.949368  | 0.198634  |
| C | -1.54366  | 3.335842  | 0.77499   |
| H | -0.811857 | 3.085958  | 1.554863  |
| H | -1.165515 | 4.238309  | 0.27616   |
| H | -2.490111 | 3.586549  | 1.262946  |
| C | -2.296621 | -1.00804  | 1.750392  |
| H | -2.48882  | 0.065385  | 1.865936  |
| H | -1.37181  | -1.23945  | 2.280473  |
| H | -3.128581 | -1.529921 | 2.242403  |
| C | -0.406858 | 1.819087  | -0.904192 |
| H | -0.017601 | 2.669768  | -1.480087 |
| H | -0.510228 | 0.965844  | -1.574519 |
| O | 0.365494  | 1.559762  | -0.171214 |
| C | 4.128284  | 1.819394  | -0.259199 |
| H | 4.831546  | 1.614076  | -1.071663 |
| H | 4.701326  | 1.979068  | 0.658725  |

|                |         |          |          |
|----------------|---------|----------|----------|
| Frequencies -- | 22.6065 | 39.3499  | 49.5556  |
| Frequencies -- | 52.1015 | 72.2593  | 81.5780  |
| Frequencies -- | 94.5701 | 110.4459 | 135.2450 |

|                                              |                             |
|----------------------------------------------|-----------------------------|
| Zero-point correction=                       | 0.373415 (Hartree/Particle) |
| Thermal correction to Energy=                | 0.394477                    |
| Thermal correction to Enthalpy=              | 0.395421                    |
| Thermal correction to Gibbs Free Energy=     | 0.323542                    |
| Sum of electronic and zero-point Energies=   | -812.403956                 |
| Sum of electronic and thermal Energies=      | -812.382894                 |
| Sum of electronic and thermal Enthalpies=    | -812.381950                 |
| Sum of electronic and thermal Free Energies= | -812.453829                 |

aa-1-4-5+.log

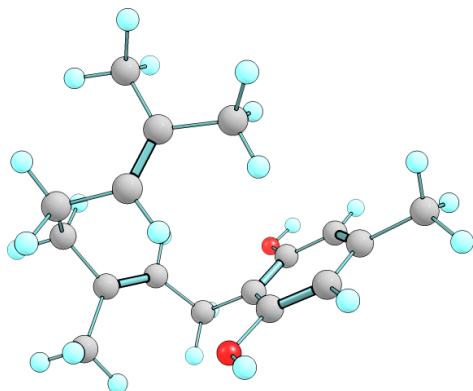

43 Atoms

|   |           |           |           |
|---|-----------|-----------|-----------|
| C | -1.267648 | -0.903314 | -1.071355 |
| C | -2.237863 | 0.037085  | -1.432772 |
| C | -3.112884 | 0.550601  | -0.469986 |
| C | -3.009208 | 0.096707  | 0.847305  |
| C | -2.035947 | -0.849066 | 1.192544  |
| C | -1.152909 | -1.382168 | 0.242581  |
| H | -2.30008  | 0.376715  | -2.463919 |
| H | -3.677063 | 0.484067  | 1.613144  |
| O | -0.37513  | -1.399861 | -1.984309 |
| H | -0.538255 | -0.990602 | -2.845017 |
| O | -1.896627 | -1.294157 | 2.481723  |
| H | -2.558282 | -0.862957 | 3.03961   |
| C | -0.0497   | -2.350783 | 0.629952  |
| C | 1.20841   | -1.566922 | 0.921535  |
| H | 0.10448   | -3.06858  | -0.178118 |
| H | -0.363111 | -2.910869 | 1.516654  |
| C | 2.328998  | -1.49156  | 0.188689  |
| H | 1.120596  | -0.902547 | 1.781643  |
| C | 3.372628  | -0.445322 | 0.520163  |
| H | 3.212362  | -0.069069 | 1.536808  |
| H | 4.382047  | -0.878615 | 0.486733  |
| C | 3.320642  | 0.76594   | -0.457229 |
| C | 1.935486  | 1.349744  | -0.565804 |
| H | 3.650511  | 0.436144  | -1.450662 |
| H | 4.050874  | 1.510359  | -0.123941 |
| C | 1.442251  | 2.423847  | 0.069562  |
| H | 1.248933  | 0.775137  | -1.186537 |
| C | -0.002764 | 2.83038   | -0.098337 |
| H | -0.525577 | 2.813397  | 0.867583  |
| H | -0.083627 | 3.859042  | -0.475081 |
| H | -0.542078 | 2.166199  | -0.778722 |
| C | 2.608129  | -2.310976 | -1.046124 |
| H | 2.687215  | -1.667357 | -1.930493 |
| H | 1.833908  | -3.049964 | -1.25315  |
| H | 3.569233  | -2.832473 | -0.949276 |
| C | 2.231939  | 3.302663  | 1.008565  |
| H | 2.212351  | 4.347433  | 0.671377  |
| H | 3.275771  | 2.9997    | 1.111899  |
| H | 1.779798  | 3.29369   | 2.009149  |
| C | -4.118938 | 1.613895  | -0.840577 |
| H | -4.989133 | 1.592156  | -0.178264 |
| H | -4.46807  | 1.493723  | -1.870442 |
| H | -3.672484 | 2.612935  | -0.762565 |

|                |         |          |          |
|----------------|---------|----------|----------|
| Frequencies -- | 24.6343 | 32.7599  | 37.3012  |
| Frequencies -- | 51.6847 | 52.4123  | 72.8591  |
| Frequencies -- | 86.0679 | 103.4420 | 111.4358 |

|                                              |                             |
|----------------------------------------------|-----------------------------|
| Zero-point correction=                       | 0.373065 (Hartree/Particle) |
| Thermal correction to Energy=                | 0.394383                    |
| Thermal correction to Enthalpy=              | 0.395327                    |
| Thermal correction to Gibbs Free Energy=     | 0.321949                    |
| Sum of electronic and zero-point Energies=   | -812.403752                 |
| Sum of electronic and thermal Energies=      | -812.382434                 |
| Sum of electronic and thermal Enthalpies=    | -812.381490                 |
| Sum of electronic and thermal Free Energies= | -812.454868                 |

aa-1-4-5a.log

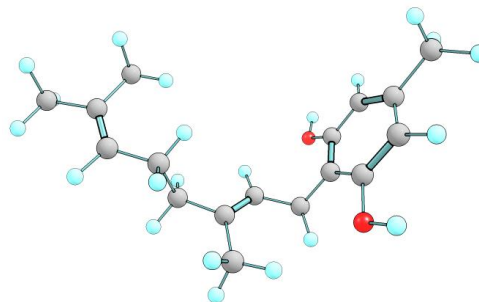

43 Atoms

|   |           |           |           |
|---|-----------|-----------|-----------|
| C | 2.710405  | 0.713565  | -0.742564 |
| C | 3.465869  | -0.301557 | -1.341038 |
| C | 3.743154  | -1.480232 | -0.642336 |
| C | 3.260019  | -1.621751 | 0.66212   |
| C | 2.506785  | -0.598216 | 1.246911  |
| C | 2.219444  | 0.594071  | 0.565819  |
| H | 3.834386  | -0.169128 | -2.355654 |
| H | 3.46391   | -2.529183 | 1.225622  |
| O | 2.425872  | 1.878277  | -1.40836  |
| H | 2.819143  | 1.845954  | -2.290996 |
| O | 2.011761  | -0.705259 | 2.521112  |
| H | 2.275879  | -1.556703 | 2.895757  |
| C | 1.377078  | 1.679504  | 1.209329  |
| C | -0.097184 | 1.341664  | 1.16669   |
| H | 1.579317  | 2.63235   | 0.718633  |
| H | 1.683066  | 1.781996  | 2.257047  |
| C | -1.043231 | 1.880141  | 0.382795  |
| H | -0.389571 | 0.538699  | 1.843217  |
| C | -2.4694   | 1.371634  | 0.454431  |
| H | -2.640998 | 0.851148  | 1.403441  |
| H | -3.168665 | 2.219487  | 0.427955  |
| C | -2.823536 | 0.399628  | -0.700533 |
| C | -4.265672 | -0.027445 | -0.661686 |
| H | -2.144211 | -0.456755 | -0.649804 |
| H | -2.623305 | 0.895512  | -1.659602 |
| C | -4.767687 | -1.217286 | -0.29536  |
| H | -4.976157 | 0.753814  | -0.937848 |
| C | -6.257084 | -1.467629 | -0.29266  |
| H | -6.51513  | -2.30535  | -0.954292 |
| H | -6.605393 | -1.748744 | 0.710171  |
| H | -6.823861 | -0.5902   | -0.617134 |
| C | -0.798915 | 2.980411  | -0.623044 |
| H | -1.27938  | 2.742363  | -1.579521 |
| H | 0.260177  | 3.147393  | -0.82277  |
| H | -1.247048 | 3.922705  | -0.280309 |
| C | -3.940229 | -2.401388 | 0.142138  |
| H | -4.236462 | -2.720672 | 1.149794  |
| H | -2.867555 | -2.20042  | 0.156909  |
| H | -4.116691 | -3.260996 | -0.517671 |
| C | 4.522546  | -2.595576 | -1.298282 |
| H | 5.061224  | -3.195711 | -0.559238 |
| H | 5.248503  | -2.206463 | -2.018296 |
| H | 3.853594  | -3.272475 | -1.843823 |

|                |         |         |          |
|----------------|---------|---------|----------|
| Frequencies -- | 15.5131 | 18.2381 | 25.4708  |
| Frequencies -- | 34.6357 | 57.6400 | 64.1595  |
| Frequencies -- | 71.0902 | 93.9132 | 111.9739 |

|                                              |                             |
|----------------------------------------------|-----------------------------|
| Zero-point correction=                       | 0.372582 (Hartree/Particle) |
| Thermal correction to Energy=                | 0.394268                    |
| Thermal correction to Enthalpy=              | 0.395213                    |
| Thermal correction to Gibbs Free Energy=     | 0.318889                    |
| Sum of electronic and zero-point Energies=   | -812.400287                 |
| Sum of electronic and thermal Energies=      | -812.378601                 |
| Sum of electronic and thermal Enthalpies=    | -812.377656                 |
| Sum of electronic and thermal Free Energies= | -812.453980                 |

aa-1-4a5-.log

aa-1-4a5+.log

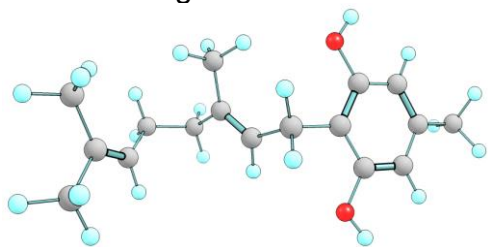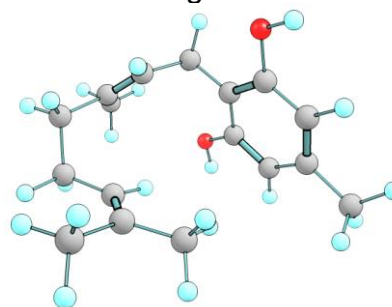

43 Atoms

|   |           |           |           |
|---|-----------|-----------|-----------|
| C | 2.589015  | 1.363437  | -0.094465 |
| C | 3.941956  | 1.291029  | 0.254287  |
| C | 4.625925  | 0.074866  | 0.16482   |
| C | 3.937126  | -1.056641 | -0.28214  |
| C | 2.583432  | -0.968495 | -0.626437 |
| C | 1.880139  | 0.242823  | -0.552312 |
| H | 4.457461  | 2.184243  | 0.598832  |
| H | 4.45061   | -2.011941 | -0.361398 |
| O | 1.885265  | 2.537244  | -0.009783 |
| H | 2.472863  | 3.239792  | 0.300612  |
| O | 1.884608  | -2.064102 | -1.064279 |
| H | 2.470415  | -2.833246 | -1.07734  |
| C | 0.4089    | 0.334828  | -0.909013 |
| C | -0.475705 | 0.250364  | 0.314808  |
| H | 0.160906  | -0.44536  | -1.629814 |
| H | 0.23156   | 1.298031  | -1.401738 |
| C | -1.303185 | -0.746139 | 0.662278  |
| H | -0.397904 | 1.110105  | 0.979922  |
| C | -2.136235 | -0.649884 | 1.922898  |
| H | -1.908382 | -1.50372  | 2.577533  |
| H | -1.869343 | 0.256812  | 2.479247  |
| C | -3.664224 | -0.644137 | 1.658821  |
| C | -4.096608 | 0.548003  | 0.850488  |
| H | -4.171938 | -0.627467 | 2.63363   |
| H | -3.95574  | -1.582921 | 1.17918   |
| C | -4.702499 | 0.575867  | -0.346382 |
| H | -3.849027 | 1.50815   | 1.307644  |
| C | -5.033839 | 1.886856  | -1.019647 |
| H | -4.544106 | 1.956564  | -2.000156 |
| H | -6.112546 | 1.972048  | -1.207436 |
| H | -4.722365 | 2.748124  | -0.421684 |
| C | -1.50059  | -2.005859 | -0.150632 |
| H | -1.613859 | -2.87239  | 0.512169  |
| H | -0.662745 | -2.205669 | -0.820308 |
| H | -2.417062 | -1.951327 | -0.751348 |
| C | -5.107992 | -0.642924 | -1.139077 |
| H | -6.185847 | -0.625846 | -1.346904 |
| H | -4.878366 | -1.584669 | -0.637669 |
| H | -4.605573 | -0.648448 | -2.115215 |
| C | 6.075669  | -0.023014 | 0.577558  |
| H | 6.600751  | -0.799016 | 0.012847  |
| H | 6.163695  | -0.277955 | 1.640841  |
| H | 6.599862  | 0.925095  | 0.425927  |

|                |         |          |          |
|----------------|---------|----------|----------|
| Frequencies -- | 16.5611 | 22.8098  | 34.5203  |
| Frequencies -- | 37.1261 | 46.5845  | 49.9180  |
| Frequencies -- | 79.4956 | 112.1552 | 132.5811 |

|                                              |                             |
|----------------------------------------------|-----------------------------|
| Zero-point correction=                       | 0.372946 (Hartree/Particle) |
| Thermal correction to Energy=                | 0.394350                    |
| Thermal correction to Enthalpy=              | 0.395294                    |
| Thermal correction to Gibbs Free Energy=     | 0.320276                    |
| Sum of electronic and zero-point Energies=   | -812.401083                 |
| Sum of electronic and thermal Energies=      | -812.379679                 |
| Sum of electronic and thermal Enthalpies=    | -812.378735                 |
| Sum of electronic and thermal Free Energies= | -812.453753                 |

43 Atoms

|   |           |           |           |
|---|-----------|-----------|-----------|
| C | -1.267588 | -0.902771 | -1.071496 |
| C | -2.237736 | 0.037794  | -1.432695 |
| C | -3.11292  | 0.550899  | -0.469854 |
| C | -3.009443 | 0.096463  | 0.847283  |
| C | -2.036263 | -0.849462 | 1.19229   |
| C | -1.153064 | -1.382176 | 0.242246  |
| H | -2.299701 | 0.377905  | -2.463698 |
| H | -3.677425 | 0.483521  | 1.613161  |
| O | -0.37491  | -1.398927 | -1.984503 |
| H | -0.537994 | -0.989417 | -2.845096 |
| O | -1.897103 | -1.295045 | 2.481315  |
| H | -2.558929 | -0.864174 | 3.039251  |
| C | -0.049879 | -2.350928 | 0.629358  |
| C | 1.208218  | -1.567145 | 0.921248  |
| H | 0.10435   | -3.06844  | -0.17895  |
| H | -0.363326 | -2.911312 | 1.515855  |
| C | 2.328887  | -1.49161  | 0.188543  |
| H | 1.120318  | -0.902997 | 1.781522  |
| C | 3.372527  | -0.445523 | 0.520483  |
| H | 3.211928  | -0.069374 | 1.537114  |
| H | 4.381913  | -0.87892  | 0.487358  |
| C | 3.321003  | 0.765842  | -0.456776 |
| C | 1.93593   | 1.349765  | -0.565787 |
| H | 3.651226  | 0.436159  | -1.450125 |
| H | 4.051154  | 1.510175  | -0.12311  |
| C | 1.442524  | 2.423622  | 0.069856  |
| H | 1.249611  | 0.775495  | -1.187103 |
| C | -0.002318 | 2.830553  | -0.098625 |
| H | -0.525593 | 2.813434  | 0.867042  |
| H | -0.082742 | 3.859335  | -0.475133 |
| H | -0.541476 | 2.166682  | -0.779426 |
| C | 2.608155  | -2.310651 | -1.046489 |
| H | 2.686883  | -1.666784 | -1.930713 |
| H | 1.834164  | -3.049854 | -1.2536   |
| H | 3.569457  | -2.831822 | -0.949893 |
| C | 2.231906  | 3.301887  | 1.009638  |
| H | 2.212807  | 4.346793  | 0.672841  |
| H | 3.275595  | 2.998599  | 1.113485  |
| H | 1.779163  | 3.292644  | 2.009944  |
| C | -4.119095 | 1.614193  | -0.840142 |
| H | -4.989251 | 1.592165  | -0.177781 |
| H | -4.468316 | 1.494182  | -1.869996 |
| H | -3.672774 | 2.613266  | -0.761936 |

|                |         |          |          |
|----------------|---------|----------|----------|
| Frequencies -- | 24.7528 | 32.8692  | 37.3346  |
| Frequencies -- | 51.4509 | 52.4219  | 72.8688  |
| Frequencies -- | 86.1161 | 103.4614 | 111.6021 |

|                                              |                             |
|----------------------------------------------|-----------------------------|
| Zero-point correction=                       | 0.373066 (Hartree/Particle) |
| Thermal correction to Energy=                | 0.394384                    |
| Thermal correction to Enthalpy=              | 0.395328                    |
| Thermal correction to Gibbs Free Energy=     | 0.321955                    |
| Sum of electronic and zero-point Energies=   | -812.403751                 |
| Sum of electronic and thermal Energies=      | -812.382433                 |
| Sum of electronic and thermal Enthalpies=    | -812.381489                 |
| Sum of electronic and thermal Free Energies= | -812.454862                 |

aa-1-4a5a.log

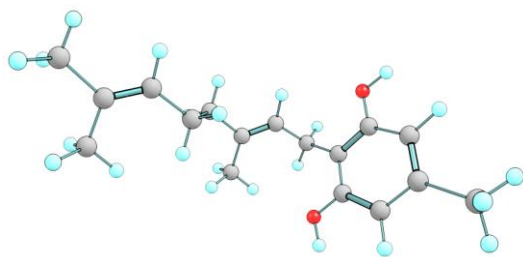

43 Atoms

|   |           |           |           |
|---|-----------|-----------|-----------|
| C | 2.622056  | 0.380535  | -1.091741 |
| C | 3.447176  | -0.705414 | -1.40583  |
| C | 4.042902  | -1.456393 | -0.388033 |
| C | 3.804838  | -1.099901 | 0.942814  |
| C | 2.977734  | -0.011614 | 1.241044  |
| C | 2.375442  | 0.759601  | 0.23605   |
| H | 3.621103  | -0.963932 | -2.447715 |
| H | 4.258424  | -1.668698 | 1.751055  |
| O | 2.024766  | 1.131258  | -2.07145  |
| H | 2.271064  | 0.780151  | -2.937999 |
| O | 2.714507  | 0.360902  | 2.534082  |
| H | 3.187423  | -0.227548 | 3.138403  |
| C | 1.461935  | 1.920875  | 0.580239  |
| C | 0.071693  | 1.446966  | 0.942525  |
| H | 1.436836  | 2.621519  | -0.255346 |
| H | 1.886352  | 2.454151  | 1.438717  |
| C | -1.052713 | 1.560684  | 0.219999  |
| H | 0.01471   | 0.928287  | 1.89968   |
| C | -2.353807 | 0.978094  | 0.735282  |
| H | -2.301719 | 0.834352  | 1.821111  |
| H | -3.177372 | 1.68082   | 0.548469  |
| C | -2.713815 | -0.377112 | 0.073166  |
| C | -4.003776 | -0.942369 | 0.601929  |
| H | -1.894022 | -1.078457 | 0.279259  |
| H | -2.748391 | -0.256151 | -1.013474 |
| C | -5.187266 | -1.037259 | -0.024371 |
| H | -3.956481 | -1.281801 | 1.638254  |
| C | -6.394954 | -1.614781 | 0.675193  |
| H | -7.214798 | -0.884878 | 0.70851   |
| H | -6.781848 | -2.487686 | 0.132617  |
| H | -6.17031  | -1.922563 | 1.700493  |
| C | -1.1395   | 2.23143   | -1.130985 |
| H | -1.713585 | 1.614319  | -1.832353 |
| H | -0.16238  | 2.41277   | -1.579846 |
| H | -1.675281 | 3.18696   | -1.052945 |
| C | -5.448094 | -0.596842 | -1.44439  |
| H | -5.801112 | -1.440828 | -2.051345 |
| H | -4.572269 | -0.169897 | -1.93623  |
| H | -6.247292 | 0.15537   | -1.468392 |
| C | 4.901068  | -2.653898 | -0.721587 |
| H | 5.644802  | -2.843238 | 0.057852  |
| H | 5.427046  | -2.516437 | -1.671001 |
| H | 4.289392  | -3.559485 | -0.816671 |

|                |         |         |          |
|----------------|---------|---------|----------|
| Frequencies -- | 9.1659  | 16.1603 | 27.3019  |
| Frequencies -- | 35.8391 | 49.2214 | 53.4601  |
| Frequencies -- | 66.5738 | 90.2183 | 106.9393 |

|                                              |                             |
|----------------------------------------------|-----------------------------|
| Zero-point correction=                       | 0.372475 (Hartree/Particle) |
| Thermal correction to Energy=                | 0.394239                    |
| Thermal correction to Enthalpy=              | 0.395183                    |
| Thermal correction to Gibbs Free Energy=     | 0.317869                    |
| Sum of electronic and zero-point Energies=   | -812.400273                 |
| Sum of electronic and thermal Energies=      | -812.378509                 |
| Sum of electronic and thermal Enthalpies=    | -812.377565                 |
| Sum of electronic and thermal Free Energies= | -812.454879                 |

# Cannabigerocin-ss-1-3t

b-ss-1-4+5+.log

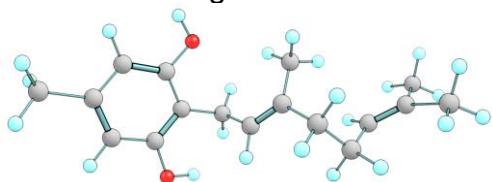

| Center Number | Atomic Number | Atomic Type | Coordinates (Angstroms) |           |           |
|---------------|---------------|-------------|-------------------------|-----------|-----------|
|               |               |             | X                       | Y         | Z         |
| 1             | 6             | 0           | -2.657843               | 1.149352  | -0.275019 |
| 2             | 6             | 0           | -3.909415               | 1.331877  | 0.317201  |
| 3             | 6             | 0           | -4.755327               | 0.235950  | 0.530455  |
| 4             | 6             | 0           | -4.326219               | -1.033855 | 0.143904  |
| 5             | 6             | 0           | -3.069263               | -1.203760 | -0.448750 |
| 6             | 6             | 0           | -2.210246               | -0.119465 | -0.683571 |
| 7             | 1             | 0           | -4.222010               | 2.329453  | 0.616744  |
| 8             | 1             | 0           | -4.950518               | -1.907925 | 0.299137  |
| 9             | 8             | 0           | -1.803016               | 2.199108  | -0.488107 |
| 10            | 1             | 0           | -2.214077               | 3.015191  | -0.171795 |
| 11            | 8             | 0           | -2.726798               | -2.490000 | -0.777053 |
| 12            | 1             | 0           | -1.868190               | -2.501767 | -1.220288 |
| 13            | 6             | 0           | -0.825902               | -0.297788 | -1.281990 |
| 14            | 6             | 0           | 0.197640                | -0.676613 | -0.234198 |
| 15            | 1             | 0           | -0.541615               | 0.618710  | -1.799597 |
| 16            | 1             | 0           | -0.853485               | -1.074135 | -2.062003 |
| 17            | 6             | 0           | 1.215857                | 0.062355  | 0.231486  |
| 18            | 1             | 0           | 0.052557                | -1.666373 | 0.202637  |
| 19            | 6             | 0           | 2.151880                | -0.521195 | 1.277830  |
| 20            | 1             | 0           | 2.575520                | 0.287626  | 1.885829  |
| 21            | 1             | 0           | 1.589508                | -1.171962 | 1.958140  |
| 22            | 6             | 0           | 3.321916                | -1.352644 | 0.683515  |
| 23            | 6             | 0           | 4.188422                | -0.595571 | -0.289423 |
| 24            | 1             | 0           | 2.888332                | -2.220706 | 0.171028  |
| 25            | 1             | 0           | 3.916350                | -1.746228 | 1.515296  |
| 26            | 6             | 0           | 5.347841                | 0.033114  | -0.038727 |
| 27            | 1             | 0           | 3.796383                | -0.536600 | -1.304937 |
| 28            | 6             | 0           | 6.086121                | 0.773094  | -1.128283 |
| 29            | 1             | 0           | 6.207169                | 1.833146  | -0.868424 |
| 30            | 1             | 0           | 7.099268                | 0.370291  | -1.259848 |
| 31            | 1             | 0           | 5.567797                | 0.715012  | -2.089743 |
| 32            | 6             | 0           | 1.533321                | 1.468704  | -0.213611 |
| 33            | 1             | 0           | 1.507196                | 2.143681  | 0.651627  |
| 34            | 1             | 0           | 0.832455                | 1.856908  | -0.952919 |
| 35            | 1             | 0           | 2.550088                | 1.525840  | -0.618665 |
| 36            | 6             | 0           | 6.018269                | 0.082079  | 1.312174  |
| 37            | 1             | 0           | 7.036955                | -0.323019 | 1.254205  |
| 38            | 1             | 0           | 5.477008                | -0.467176 | 2.084771  |
| 39            | 1             | 0           | 6.118495                | 1.122115  | 1.648950  |
| 40            | 6             | 0           | -6.120744               | 0.437687  | 1.144166  |
| 41            | 1             | 0           | -6.514037               | -0.493587 | 1.560874  |
| 42            | 1             | 0           | -6.838437               | 0.792979  | 0.394657  |
| 43            | 1             | 0           | -6.092050               | 1.185735  | -1.942661 |

| Freq           |         |         |          |
|----------------|---------|---------|----------|
| Frequencies -- | 10.2486 | 18.6965 | 25.7733  |
| Frequencies -- | 31.7243 | 38.8923 | 45.0049  |
| Frequencies -- | 90.9356 | 96.4803 | 111.8024 |

|                                              |                             |
|----------------------------------------------|-----------------------------|
| Zero-point correction=                       | 0.372502 (Hartree/Particle) |
| Thermal correction to Energy=                | 0.394186                    |
| Thermal correction to Enthalpy=              | 0.395130                    |
| Thermal correction to Gibbs Free Energy=     | 0.318122                    |
| Sum of electronic and zero-point Energies=   | -812.397619                 |
| Sum of electronic and thermal Energies=      | -812.375934                 |
| Sum of electronic and thermal Enthalpies=    | -812.374990                 |
| Sum of electronic and thermal Free Energies= | -812.451999                 |

# b-ss-1-4+5-.log

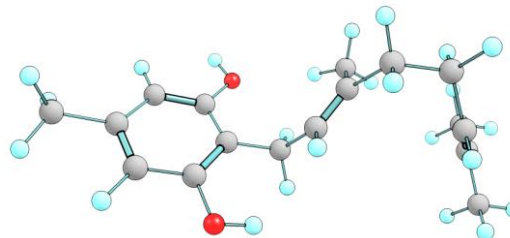

Standard orientation:

| Center Number | Atomic Number | Atomic Type | Coordinates (Angstroms) |           |           |
|---------------|---------------|-------------|-------------------------|-----------|-----------|
|               |               |             | X                       | Y         | Z         |
| 1             | 6             | 0           | 2.593317                | -0.954867 | -0.628003 |
| 2             | 6             | 0           | 3.943058                | -1.049290 | -0.281267 |
| 3             | 6             | 0           | 4.634771                | 0.080184  | 0.174176  |
| 4             | 6             | 0           | 3.956749                | 1.296030  | 0.266721  |
| 5             | 6             | 0           | 2.604430                | 1.377386  | -0.084699 |
| 6             | 6             | 0           | 1.892528                | 0.261123  | -0.549872 |
| 7             | 1             | 0           | 4.453515                | -2.005962 | -0.363395 |
| 8             | 1             | 0           | 4.459222                | 2.193338  | 0.613449  |
| 9             | 8             | 0           | 1.887730                | -2.044120 | -1.070138 |
| 10            | 1             | 0           | 2.468017                | -2.817479 | -1.085013 |
| 11            | 8             | 0           | 2.017369                | 2.608520  | 0.053609  |
| 12            | 1             | 0           | 1.106879                | 2.579138  | -0.268752 |
| 13            | 6             | 0           | 0.417266                | 0.334729  | -0.900905 |
| 14            | 6             | 0           | -0.465960               | 0.230482  | 0.323078  |
| 15            | 1             | 0           | 0.181546                | -0.446182 | -1.624136 |
| 16            | 1             | 0           | 0.205022                | 1.281998  | -1.420846 |
| 17            | 6             | 0           | -1.306313               | -0.764847 | 0.640631  |
| 18            | 1             | 0           | -0.377842               | 1.064376  | 1.020530  |
| 19            | 6             | 0           | -2.133371               | -0.698067 | 1.906763  |
| 20            | 1             | 0           | -1.906158               | -1.570729 | 2.535920  |
| 21            | 1             | 0           | -1.859867               | 0.191630  | 2.486605  |
| 22            | 6             | 0           | -3.661801               | -0.678668 | 1.647311  |
| 23            | 6             | 0           | -4.089982               | 0.532100  | 0.864765  |
| 24            | 1             | 0           | -4.165791               | -0.679850 | 2.624043  |
| 25            | 1             | 0           | -3.959520               | -1.605686 | 1.149144  |
| 26            | 6             | 0           | -4.704530               | 0.586495  | -0.326811 |
| 27            | 1             | 0           | -3.831885               | 1.481535  | 1.338099  |
| 28            | 6             | 0           | -5.030639               | 1.912196  | -0.973270 |
| 29            | 1             | 0           | -4.548642               | 1.995825  | -1.956526 |
| 30            | 1             | 0           | -6.110116               | 2.009270  | -1.150312 |
| 31            | 1             | 0           | -4.707454               | 2.759956  | -0.362385 |
| 32            | 6             | 0           | -1.524403               | -1.993239 | -0.213172 |
| 33            | 1             | 0           | -1.670307               | -2.875913 | 0.420654  |
| 34            | 1             | 0           | -0.682988               | -2.195319 | -0.877796 |
| 35            | 1             | 0           | -2.430200               | -1.893121 | -0.823703 |
| 36            | 6             | 0           | -5.127046               | -0.614205 | -1.138088 |
| 37            | 1             | 0           | -6.206780               | -0.584881 | -1.334242 |
| 38            | 1             | 0           | -4.899969               | -1.567129 | -0.657017 |
| 39            | 1             | 0           | -4.634893               | -0.605042 | -2.119423 |
| 40            | 6             | 0           | 6.083705                | -0.030006 | 0.586634  |
| 41            | 1             | 0           | 6.583200                | 0.942338  | 0.558442  |
| 42            | 1             | 0           | 6.632770                | -0.716942 | -0.064842 |
| 43            | 1             | 0           | 6.170767                | -0.415599 | 1.609778  |

|                |         |          |          |
|----------------|---------|----------|----------|
| Frequencies -- | 16.9001 | 23.9657  | 33.3588  |
| Frequencies -- | 46.4587 | 48.8619  | 51.3275  |
| Frequencies -- | 77.8760 | 114.4658 | 136.3558 |

|                                              |                             |
|----------------------------------------------|-----------------------------|
| Zero-point correction=                       | 0.372845 (Hartree/Particle) |
| Thermal correction to Energy=                | 0.394239                    |
| Thermal correction to Enthalpy=              | 0.395183                    |
| Thermal correction to Gibbs Free Energy=     | 0.320459                    |
| Sum of electronic and zero-point Energies=   | -812.399999                 |
| Sum of electronic and thermal Energies=      | -812.378605                 |
| Sum of electronic and thermal Enthalpies=    | -812.377661                 |
| Sum of electronic and thermal Free Energies= | -812.452385                 |

b-ss-1-4+5a.log

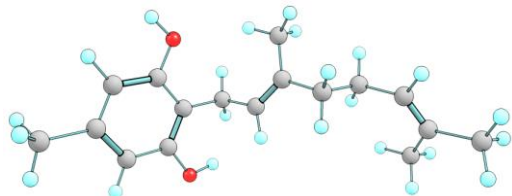

Standard orientation:

| Center Number | Atomic Number | Atomic Type | Coordinates (Angstroms) |           |           |
|---------------|---------------|-------------|-------------------------|-----------|-----------|
|               |               |             | X                       | Y         | Z         |
| 1             | 6             | 0           | -3.059518               | 1.009068  | -0.015012 |
| 2             | 6             | 0           | -4.196911               | 0.716797  | 0.739310  |
| 3             | 6             | 0           | -4.663306               | -0.601702 | 0.830468  |
| 4             | 6             | 0           | -3.975376               | -1.609439 | 0.155884  |
| 5             | 6             | 0           | -2.835069               | -1.302989 | -0.597440 |
| 6             | 6             | 0           | -2.356297               | 0.010016  | -0.712130 |
| 7             | 1             | 0           | -4.717977               | 1.517051  | 1.259593  |
| 8             | 1             | 0           | -4.303964               | -2.642539 | 0.204567  |
| 9             | 8             | 0           | -2.573557               | 2.286988  | -0.117867 |
| 10            | 1             | 0           | -3.134849               | 2.885491  | 0.393761  |
| 11            | 8             | 0           | -2.215089               | -2.361158 | -1.210043 |
| 12            | 1             | 0           | -1.472133               | -2.047594 | -1.742517 |
| 13            | 6             | 0           | -1.101116               | 0.345658  | -1.497591 |
| 14            | 6             | 0           | 0.155895                | 0.089526  | -0.695299 |
| 15            | 1             | 0           | -1.153169               | 1.382908  | -1.829077 |
| 16            | 1             | 0           | -1.069738               | -0.251463 | -2.422339 |
| 17            | 6             | 0           | 1.036520                | 0.995054  | -0.243641 |
| 18            | 1             | 0           | 0.332488                | -0.958062 | -0.448009 |
| 19            | 6             | 0           | 2.254837                | 0.551175  | 0.537831  |
| 20            | 1             | 0           | 2.278452                | 1.073812  | 1.505491  |
| 21            | 1             | 0           | 2.195573                | -0.520519 | 0.758818  |
| 22            | 6             | 0           | 3.590489                | 0.827841  | -0.197699 |
| 23            | 6             | 0           | 4.781137                | 0.421025  | 0.627103  |
| 24            | 1             | 0           | 3.658945                | 1.901202  | -0.418625 |
| 25            | 1             | 0           | 3.570176                | 0.313823  | -1.163719 |
| 26            | 6             | 0           | 5.617440                | -0.609842 | 0.428256  |
| 27            | 1             | 0           | 4.947638                | 1.038816  | 1.511479  |
| 28            | 6             | 0           | 6.756289                | -0.883575 | 1.381976  |
| 29            | 1             | 0           | 6.672968                | -1.890281 | 1.812759  |
| 30            | 1             | 0           | 7.721697                | -0.851304 | 0.859410  |
| 31            | 1             | 0           | 6.789508                | -0.162567 | 2.203752  |
| 32            | 6             | 0           | 0.917738                | 2.484279  | -0.477582 |
| 33            | 1             | 0           | 1.244413                | 3.033961  | 0.413126  |
| 34            | 1             | 0           | -0.104769               | 2.791405  | -0.702165 |
| 35            | 1             | 0           | 1.564382                | 2.812442  | -1.301061 |
| 36            | 6             | 0           | 5.528545                | -1.581723 | -0.723037 |
| 37            | 1             | 0           | 6.453921                | -1.565842 | -1.313575 |
| 38            | 1             | 0           | 4.693905                | -1.382015 | -1.397223 |
| 39            | 1             | 0           | 5.420315                | -2.607536 | -0.347517 |
| 40            | 6             | 0           | -5.890957               | -0.913431 | 1.653574  |
| 41            | 1             | 0           | -6.148758               | -1.974440 | 1.604084  |
| 42            | 1             | 0           | -6.755968               | -0.337681 | 1.305862  |
| 43            | 1             | 0           | -5.735942               | -0.652143 | 2.706583  |

Frequencies -- -27.4587      20.3759      24.2156  
 Frequencies -- 29.1567      42.8860      50.0829  
 Frequencies -- 72.8049      88.3570      122.0995

Zero-point correction= 0.372401 (Hartree/Particle)  
 Thermal correction to Energy= 0.393230  
 Thermal correction to Enthalpy= 0.394174  
 Thermal correction to Gibbs Free Energy= 0.320628  
 Sum of electronic and zero-point Energies= -812.399122  
 Sum of electronic and thermal Energies= -812.378292  
 Sum of electronic and thermal Enthalpies= -812.377348  
 Sum of electronic and thermal Free Energies= -812.450895

b-ss-1-4-5+.log

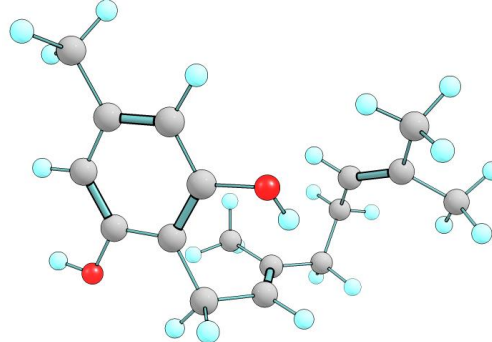

Standard orientation:

| Center Number | Atomic Number | Atomic Type | Coordinates (Angstroms) |           |           |
|---------------|---------------|-------------|-------------------------|-----------|-----------|
|               |               |             | X                       | Y         | Z         |
| 1             | 6             | 0           | -2.856315               | -0.815444 | 0.246853  |
| 2             | 6             | 0           | -3.630519               | 0.162628  | -0.384383 |
| 3             | 6             | 0           | -3.171953               | 1.481739  | -0.470802 |
| 4             | 6             | 0           | -1.919248               | 1.793093  | 0.061781  |
| 5             | 6             | 0           | -1.151890               | 0.805910  | 0.687772  |
| 6             | 6             | 0           | -1.606728               | -0.517645 | 0.815257  |
| 7             | 1             | 0           | -4.593499               | -0.109226 | -0.810554 |
| 8             | 1             | 0           | -1.513241               | 2.797242  | -0.009008 |
| 9             | 8             | 0           | -3.281766               | -2.117981 | 0.328780  |
| 10            | 1             | 0           | -4.133266               | -2.203606 | -0.121467 |
| 11            | 8             | 0           | 0.062697                | 1.195586  | 1.193880  |
| 12            | 1             | 0           | 0.689171                | 0.452799  | 1.125356  |
| 13            | 6             | 0           | -0.790651               | -1.569408 | 1.548318  |
| 14            | 6             | 0           | 0.646080                | -1.716863 | 1.072769  |
| 15            | 1             | 0           | -1.311202               | -2.528773 | 1.476090  |
| 16            | 1             | 0           | -0.770781               | -1.314237 | 2.614918  |
| 17            | 6             | 0           | 1.043782                | -1.935990 | -0.192573 |
| 18            | 1             | 0           | 1.414551                | -1.642056 | 1.842208  |
| 19            | 6             | 0           | 2.511661                | -1.973709 | -0.546457 |
| 20            | 1             | 0           | 3.117435                | -1.942369 | 0.365846  |
| 21            | 1             | 0           | 2.743318                | -2.915608 | -1.063264 |
| 22            | 6             | 0           | 2.938003                | -0.793600 | -1.462515 |
| 23            | 6             | 0           | 2.622866                | 0.552006  | -0.858413 |
| 24            | 1             | 0           | 2.422923                | -0.886072 | -2.426040 |
| 25            | 1             | 0           | 4.007138                | -0.895769 | -1.675427 |
| 26            | 6             | 0           | 3.415419                | 1.288492  | -0.062746 |
| 27            | 1             | 0           | 1.623795                | 0.935025  | -1.063488 |
| 28            | 6             | 0           | 2.952831                | 2.613037  | 0.494694  |
| 29            | 1             | 0           | 3.032114                | 2.623163  | 1.589642  |
| 30            | 1             | 0           | 3.587676                | 3.431803  | 0.130397  |
| 31            | 1             | 0           | 1.914441                | 2.825767  | 0.232561  |
| 32            | 6             | 0           | 0.080631                | -2.098276 | -1.345091 |
| 33            | 1             | 0           | -0.055117               | -1.149700 | -1.879609 |
| 34            | 1             | 0           | -0.906551               | -2.432676 | -1.020324 |
| 35            | 1             | 0           | 0.471116                | -2.820584 | -2.070605 |
| 36            | 6             | 0           | 4.810846                | 0.888126  | 0.348719  |
| 37            | 1             | 0           | 5.535388                | 1.661952  | 0.063600  |
| 38            | 1             | 0           | 5.135949                | -0.059169 | -0.085558 |
| 39            | 1             | 0           | 4.872167                | 0.795435  | 1.440765  |
| 40            | 6             | 0           | -4.024003               | 2.547584  | -1.118333 |
| 41            | 1             | 0           | -3.412001               | 3.365988  | -1.508087 |
| 42            | 1             | 0           | -4.726940               | 2.979838  | -0.395550 |
| 43            | 1             | 0           | -4.616897               | 2.139917  | -1.942764 |

Frequencies -- 23.0723      30.7035      37.4400  
 Frequencies -- 54.7526      75.6948      78.9959  
 Frequencies -- 99.5285      119.5327      123.6016

Zero-point correction= 0.373263 (Hartree/Particle)  
 Thermal correction to Energy= 0.394286  
 Thermal correction to Enthalpy= 0.395230  
 Thermal correction to Gibbs Free Energy= 0.322834  
 Sum of electronic and zero-point Energies= -812.405211  
 Sum of electronic and thermal Energies= -812.384188  
 Sum of electronic and thermal Enthalpies= -812.383243  
 Sum of electronic and thermal Free Energies= -812.455639



b-ss-1-4-5-.log

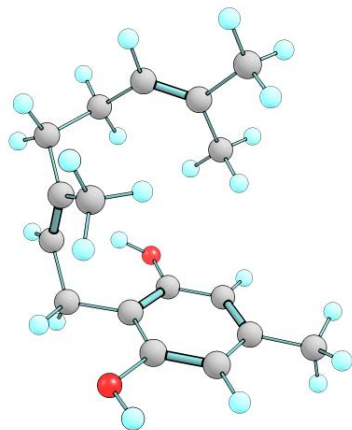

Standard orientation:

| Center Number | Atomic Number | Atomic Type | Coordinates (Angstroms) |           |           |
|---------------|---------------|-------------|-------------------------|-----------|-----------|
|               |               |             | X                       | Y         | Z         |
| 1             | 6             | 0           | 2.470133                | -0.809661 | 0.747574  |
| 2             | 6             | 0           | 3.111393                | 0.430337  | 0.822009  |
| 3             | 6             | 0           | 2.864702                | 1.413314  | -0.142744 |
| 4             | 6             | 0           | 1.951005                | 1.139811  | -1.162477 |
| 5             | 6             | 0           | 1.310708                | -0.101869 | -1.222356 |
| 6             | 6             | 0           | 1.566031                | -1.115498 | -0.283020 |
| 7             | 1             | 0           | 3.803707                | 0.626791  | 1.637487  |
| 8             | 1             | 0           | 1.709212                | 1.884483  | -1.913857 |
| 9             | 8             | 0           | 2.688137                | -1.782111 | 1.691010  |
| 10            | 1             | 0           | 3.295566                | -1.443068 | 2.362690  |
| 11            | 8             | 0           | 0.422919                | -0.290905 | -2.250610 |
| 12            | 1             | 0           | -0.213755               | -0.975720 | -1.979261 |
| 13            | 6             | 0           | 0.899257                | -2.478953 | -0.381606 |
| 14            | 6             | 0           | -0.613804               | -2.441581 | -0.536736 |
| 15            | 1             | 0           | 1.171448                | -3.063830 | 0.501980  |
| 16            | 1             | 0           | 1.319240                | -3.016408 | -1.240817 |
| 17            | 6             | 0           | -1.472456               | -1.809400 | 0.284793  |
| 18            | 1             | 0           | -1.024074               | -2.987203 | -1.387451 |
| 19            | 6             | 0           | -2.948988               | -1.768235 | -0.046515 |
| 20            | 1             | 0           | -3.186563               | -2.570372 | -0.754493 |
| 21            | 1             | 0           | -3.541992               | -1.953472 | 0.859047  |
| 22            | 6             | 0           | -3.407671               | -0.423117 | -0.678224 |
| 23            | 6             | 0           | -3.438207               | 0.736705  | 0.279290  |
| 24            | 1             | 0           | -4.423177               | -0.578720 | -1.068266 |
| 25            | 1             | 0           | -2.771953               | -0.213807 | -1.543816 |
| 26            | 6             | 0           | -2.660642               | 1.830781  | 0.290977  |
| 27            | 1             | 0           | -4.189472               | 0.646319  | 1.066045  |
| 28            | 6             | 0           | -2.836243               | 2.894176  | 1.348855  |
| 29            | 1             | 0           | -1.915142               | 3.014634  | 1.934695  |
| 30            | 1             | 0           | -3.041861               | 3.871907  | 0.893323  |
| 31            | 1             | 0           | -3.651830               | 2.660398  | 2.039141  |
| 32            | 6             | 0           | -1.020725               | -1.093893 | 1.536447  |
| 33            | 1             | 0           | -0.899259               | -0.021693 | 1.352681  |
| 34            | 1             | 0           | -0.070463               | -1.479777 | 1.913096  |
| 35            | 1             | 0           | -1.774937               | -1.192984 | 2.324081  |
| 36            | 6             | 0           | -1.545025               | 2.109605  | -0.685027 |
| 37            | 1             | 0           | -1.713859               | 3.063207  | -1.202474 |
| 38            | 1             | 0           | -1.404911               | 1.331660  | -1.436002 |
| 39            | 1             | 0           | -0.591192               | 2.211745  | -0.151669 |
| 40            | 6             | 0           | 3.584957                | 2.739737  | -0.087640 |
| 41            | 1             | 0           | 4.543867                | 2.687248  | -0.617888 |
| 42            | 1             | 0           | 3.800240                | 3.035844  | 0.943443  |
| 43            | 1             | 0           | 2.996174                | 3.533392  | -0.556512 |

|                |         |          |          |
|----------------|---------|----------|----------|
| Frequencies -- | 31.3192 | 39.1079  | 44.8365  |
| Frequencies -- | 55.8499 | 65.0189  | 72.3726  |
| Frequencies -- | 83.2052 | 114.0158 | 136.9485 |

Zero-point correction= 0.373081 (Hartree/Particle)  
 Thermal correction to Energy= 0.394089  
 Thermal correction to Enthalpy= 0.395033  
 Thermal correction to Gibbs Free Energy= 0.323215  
 Sum of electronic and zero-point Energies= -812.404936  
 Sum of electronic and thermal Energies= -812.383927  
 Sum of electronic and thermal Enthalpies= -812.382983  
 Sum of electronic and thermal Free Energies= -812.454802

b-ss-1-4-5a.log

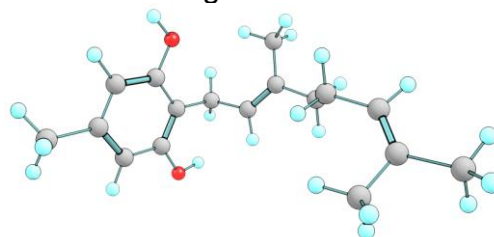

Standard orientation:

| Center Number | Atomic Number | Atomic Type | Coordinates (Angstroms) |           |           |
|---------------|---------------|-------------|-------------------------|-----------|-----------|
|               |               |             | X                       | Y         | Z         |
| 1             | 6             | 0           | 2.607332                | 0.630845  | -0.837240 |
| 2             | 6             | 0           | 3.352422                | -0.412318 | -1.391481 |
| 3             | 6             | 0           | 3.732488                | -1.504788 | -0.601464 |
| 4             | 6             | 0           | 3.362393                | -1.527266 | 0.743447  |
| 5             | 6             | 0           | 2.615291                | -0.475697 | 1.286883  |
| 6             | 6             | 0           | 2.228786                | 0.631553  | 0.516634  |
| 7             | 1             | 0           | 3.632820                | -0.373845 | -2.441420 |
| 8             | 1             | 0           | 3.639711                | -2.355425 | 1.387656  |
| 9             | 8             | 0           | 2.214741                | 1.710150  | -1.585421 |
| 10            | 1             | 0           | 2.537298                | 1.606359  | -2.491086 |
| 11            | 8             | 0           | 2.281747                | -0.593237 | 2.611400  |
| 12            | 1             | 0           | 1.831870                | 0.207396  | 2.912199  |
| 13            | 6             | 0           | 1.380686                | 1.754592  | 1.087148  |
| 14            | 6             | 0           | -0.088559               | 1.393736  | 1.094867  |
| 15            | 1             | 0           | 1.561286                | 2.665061  | 0.515570  |
| 16            | 1             | 0           | 1.706572                | 1.986086  | 2.112930  |
| 17            | 6             | 0           | -1.066464               | 1.910179  | 0.335961  |
| 18            | 1             | 0           | -0.354742               | 0.588171  | 1.780995  |
| 19            | 6             | 0           | -2.477901               | 1.369344  | 0.448171  |
| 20            | 1             | 0           | -2.614437               | 0.855140  | 1.406157  |
| 21            | 1             | 0           | -3.196841               | 2.200364  | 0.429642  |
| 22            | 6             | 0           | -2.834174               | 0.376801  | -0.688604 |
| 23            | 6             | 0           | -4.264325               | -0.084241 | -0.611417 |
| 24            | 1             | 0           | -2.133267               | -0.462372 | -0.644674 |
| 25            | 1             | 0           | -2.668167               | 0.867147  | -1.656958 |
| 26            | 6             | 0           | -4.727817               | -1.281677 | -0.220023 |
| 27            | 1             | 0           | -4.999797               | 0.676035  | -0.880373 |
| 28            | 6             | 0           | -6.209937               | -1.569154 | -0.180630 |
| 29            | 1             | 0           | -6.461507               | -2.419712 | -0.828197 |
| 30            | 1             | 0           | -6.527788               | -1.849064 | 0.832569  |
| 31            | 1             | 0           | -6.806091               | -0.709599 | -0.500217 |
| 32            | 6             | 0           | -0.876768               | 3.012828  | -0.678028 |
| 33            | 1             | 0           | -1.377665               | 2.759721  | -1.619716 |
| 34            | 1             | 0           | 0.170882                | 3.208810  | -0.908284 |
| 35            | 1             | 0           | -1.339733               | 3.942853  | -0.322696 |
| 36            | 6             | 0           | -3.861018               | -2.439325 | 0.211883  |
| 37            | 1             | 0           | -4.128106               | -2.755394 | 1.228595  |
| 38            | 1             | 0           | -2.793898               | -2.210527 | 0.202316  |
| 39            | 1             | 0           | -4.028547               | -3.310049 | -0.435532 |
| 40            | 6             | 0           | 4.505800                | -2.650774 | -1.210005 |
| 41            | 1             | 0           | 5.017232                | -3.240296 | -0.444217 |
| 42            | 1             | 0           | 5.254262                | -2.292382 | -1.923739 |
| 43            | 1             | 0           | 3.837323                | -3.327615 | -1.755973 |

|                |         |         |          |
|----------------|---------|---------|----------|
| Frequencies -- | 14.5201 | 17.6006 | 29.2657  |
| Frequencies -- | 34.2521 | 55.4171 | 62.1419  |
| Frequencies -- | 66.5415 | 96.3657 | 108.7761 |

Zero-point correction= 0.372483 (Hartree/Particle)  
 Thermal correction to Energy= 0.394194  
 Thermal correction to Enthalpy= 0.395138  
 Thermal correction to Gibbs Free Energy= 0.318665  
 Sum of electronic and zero-point Energies= -812.399127  
 Sum of electronic and thermal Energies= -812.377416  
 Sum of electronic and thermal Enthalpies= -812.376472  
 Sum of electronic and thermal Free Energies= -812.452946

b-ss-1-4a5+.log

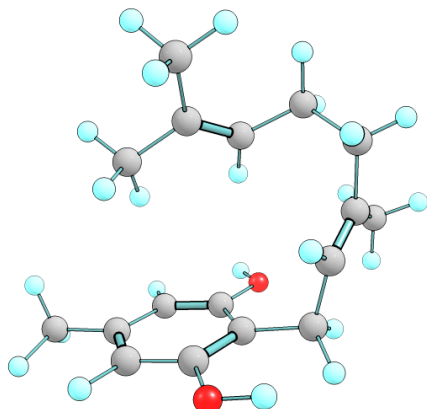

Standard orientation:

| Center Number | Atomic Number | Atomic Type | Coordinates (Angstroms) |           |           |
|---------------|---------------|-------------|-------------------------|-----------|-----------|
|               |               |             | X                       | Y         | Z         |
| 1             | 6             | 0           | -1.296504               | -1.009591 | -1.030252 |
| 2             | 6             | 0           | -2.300461               | -0.117750 | -1.412891 |
| 3             | 6             | 0           | -3.133140               | 0.461820  | -0.447044 |
| 4             | 6             | 0           | -2.949176               | 0.124154  | 0.893283  |
| 5             | 6             | 0           | -1.942234               | -0.776016 | 1.263358  |
| 6             | 6             | 0           | -1.105791               | -1.380079 | 0.312308  |
| 7             | 1             | 0           | -2.423603               | 0.135040  | -2.463321 |
| 8             | 1             | 0           | -3.570168               | 0.557276  | 1.670852  |
| 9             | 8             | 0           | -0.441803               | -1.565406 | -1.945528 |
| 10            | 1             | 0           | -0.659846               | -1.234436 | -2.827534 |
| 11            | 8             | 0           | -1.823193               | -1.025675 | 2.605458  |
| 12            | 1             | 0           | -1.103833               | -1.651421 | 2.763083  |
| 13            | 6             | 0           | 0.034073                | -2.307753 | 0.699533  |
| 14            | 6             | 0           | 1.277867                | -1.488770 | 0.952321  |
| 15            | 1             | 0           | 0.187186                | -3.038715 | -0.095577 |
| 16            | 1             | 0           | -0.234944               | -2.892372 | 1.591881  |
| 17            | 6             | 0           | 2.382164                | -1.407568 | 0.196283  |
| 18            | 1             | 0           | 1.191053                | -0.799677 | 1.793127  |
| 19            | 6             | 0           | 3.403431                | -0.326615 | 0.480425  |
| 20            | 1             | 0           | 3.248523                | 0.074671  | 1.488131  |
| 21            | 1             | 0           | 4.422730                | -0.735043 | 0.443223  |
| 22            | 6             | 0           | 3.302371                | 0.854082  | -0.530718 |
| 23            | 6             | 0           | 1.893445                | 1.374681  | -0.655978 |
| 24            | 1             | 0           | 3.648003                | 0.512387  | -1.514424 |
| 25            | 1             | 0           | 3.999426                | 1.637618  | -0.216489 |
| 26            | 6             | 0           | 1.340513                | 2.417605  | -0.018156 |
| 27            | 1             | 0           | 1.241701                | 0.773417  | -1.288863 |
| 28            | 6             | 0           | -0.120478               | 2.753821  | -0.201012 |
| 29            | 1             | 0           | -0.656746               | 2.688835  | 0.755164  |
| 30            | 1             | 0           | -0.248156               | 3.784549  | -0.558593 |
| 31            | 1             | 0           | -0.615189               | 2.076898  | -0.902094 |
| 32            | 6             | 0           | 2.657263                | -2.252361 | -1.021838 |
| 33            | 1             | 0           | 2.699252                | -1.629502 | -1.923404 |
| 34            | 1             | 0           | 1.900598                | -3.018138 | -1.193531 |
| 35            | 1             | 0           | 3.634723                | -2.743231 | -0.932459 |
| 36            | 6             | 0           | 2.075568                | 3.321167  | 0.941191  |
| 37            | 1             | 0           | 2.010217                | 4.368144  | 0.617082  |
| 38            | 1             | 0           | 3.131222                | 3.066213  | 1.054392  |
| 39            | 1             | 0           | 1.611886                | 3.277078  | 1.935525  |
| 40            | 6             | 0           | -4.178294               | 1.473227  | -0.852882 |
| 41            | 1             | 0           | -4.972798               | 1.551579  | -0.105627 |
| 42            | 1             | 0           | -4.633976               | 1.214463  | -1.813620 |
| 43            | 1             | 0           | -3.730990               | 2.468700  | -0.963945 |

|                |         |          |          |
|----------------|---------|----------|----------|
| Frequencies -- | 25.3496 | 34.1789  | 37.3625  |
| Frequencies -- | 51.3321 | 60.0141  | 72.6522  |
| Frequencies -- | 84.9353 | 105.9180 | 112.1561 |

Zero-point correction= 0.372994 (Hartree/Particle)  
 Thermal correction to Energy= 0.394315  
 Thermal correction to Enthalpy= 0.395260  
 Thermal correction to Gibbs Free Energy= 0.322040  
 Sum of electronic and zero-point Energies= -812.402603  
 Sum of electronic and thermal Energies= -812.381282  
 Sum of electronic and thermal Enthalpies= -812.380338  
 Sum of electronic and thermal Free Energies= -812.453558

b-ss-1-4a5-.log

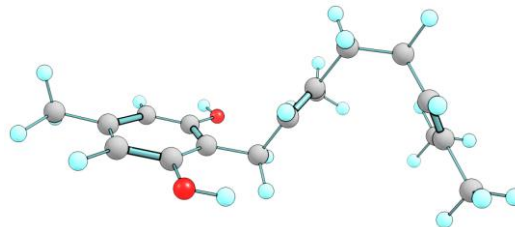

Standard orientation:

| Center Number | Atomic Number | Atomic Type | Coordinates (Angstroms) |           |           |
|---------------|---------------|-------------|-------------------------|-----------|-----------|
|               |               |             | X                       | Y         | Z         |
| 1             | 6             | 0           | 2.604381                | 1.377419  | -0.084665 |
| 2             | 6             | 0           | 3.956705                | 1.296082  | 0.266739  |
| 3             | 6             | 0           | 4.634749                | 0.080252  | 0.174165  |
| 4             | 6             | 0           | 3.943058                | -1.049225 | -0.281300 |
| 5             | 6             | 0           | 2.593310                | -0.954823 | -0.628011 |
| 6             | 6             | 0           | 1.892499                | 0.261153  | -0.549862 |
| 7             | 1             | 0           | 4.459162                | 2.193388  | 0.613493  |
| 8             | 1             | 0           | 4.453525                | -2.005890 | -0.363438 |
| 9             | 8             | 0           | 2.017290                | 2.608526  | 0.053728  |
| 10            | 1             | 0           | 1.106803                | 2.579147  | -0.268642 |
| 11            | 8             | 0           | 1.887735                | -2.044080 | -1.070149 |
| 12            | 1             | 0           | 2.468048                | -2.817418 | -1.085086 |
| 13            | 6             | 0           | 0.417241                | 0.334729  | -0.900921 |
| 14            | 6             | 0           | -0.466017               | 0.230407  | 0.323030  |
| 15            | 1             | 0           | 0.181560                | -0.446149 | -1.624200 |
| 16            | 1             | 0           | 0.204975                | 1.282018  | -1.420818 |
| 17            | 6             | 0           | -1.306284               | -0.764995 | 0.640575  |
| 18            | 1             | 0           | -0.377972               | 1.064308  | 1.020482  |
| 19            | 6             | 0           | -2.133374               | -0.698284 | 1.906688  |
| 20            | 1             | 0           | -1.906189               | -1.570984 | 2.535800  |
| 21            | 1             | 0           | -1.859895               | 0.191377  | 2.486597  |
| 22            | 6             | 0           | -3.661799               | -0.678866 | 1.647191  |
| 23            | 6             | 0           | -4.089971               | 0.532013  | 0.864810  |
| 24            | 1             | 0           | -4.165812               | -0.680188 | 2.623911  |
| 25            | 1             | 0           | -3.959491               | -1.605818 | 1.148887  |
| 26            | 6             | 0           | -4.704514               | 0.586584  | -0.326759 |
| 27            | 1             | 0           | -3.831884               | 1.481378  | 1.338288  |
| 28            | 6             | 0           | -5.030618               | 1.912383  | -0.973025 |
| 29            | 1             | 0           | -4.548546               | 1.996187  | -1.956229 |
| 30            | 1             | 0           | -6.110084               | 2.009451  | -1.150135 |
| 31            | 1             | 0           | -4.707510               | 2.760050  | -0.361974 |
| 32            | 6             | 0           | -1.524235               | -1.993424 | -0.213204 |
| 33            | 1             | 0           | -1.669909               | -2.876121 | 0.420647  |
| 34            | 1             | 0           | -0.682853               | -2.195352 | -0.877913 |
| 35            | 1             | 0           | -2.430116               | -1.893501 | -0.823645 |
| 36            | 6             | 0           | -5.127004               | -0.613992 | -1.138237 |
| 37            | 1             | 0           | -6.206745               | -0.584695 | -1.334345 |
| 38            | 1             | 0           | -4.899854               | -1.566992 | -0.657351 |
| 39            | 1             | 0           | -4.634882               | -0.604616 | -2.119586 |
| 40            | 6             | 0           | 6.083674                | -0.029938 | 0.586650  |
| 41            | 1             | 0           | 6.632720                | -0.716994 | -0.064717 |
| 42            | 1             | 0           | 6.170722                | -0.415378 | 1.609853  |
| 43            | 1             | 0           | 6.583216                | 0.942378  | 0.558307  |

|                |         |          |          |
|----------------|---------|----------|----------|
| Frequencies -- | 16.9006 | 23.9491  | 33.3606  |
| Frequencies -- | 46.4611 | 48.8792  | 51.3269  |
| Frequencies -- | 77.8457 | 114.4549 | 136.3421 |

Zero-point correction= 0.372845 (Hartree/Particle)  
 Thermal correction to Energy= 0.394239  
 Thermal correction to Enthalpy= 0.395183  
 Thermal correction to Gibbs Free Energy= 0.320458  
 Sum of electronic and zero-point Energies= -812.399999  
 Sum of electronic and thermal Energies= -812.378605  
 Sum of electronic and thermal Enthalpies= -812.377661  
 Sum of electronic and thermal Free Energies= -812.452386

b-ss-1-4a5a.log

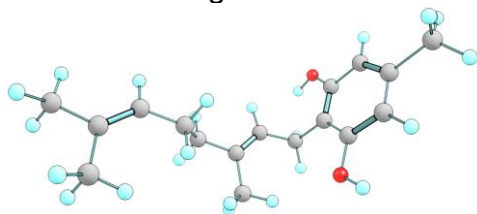

Standard orientation:

| Center Number | Atomic Number | Atomic Type | Coordinates (Angstroms) |           |           |
|---------------|---------------|-------------|-------------------------|-----------|-----------|
|               |               |             | X                       | Y         | Z         |
| 1             | 6             | 0           | -2.596899               | -0.283982 | -1.111366 |
| 2             | 6             | 0           | -3.415794               | 0.819833  | -1.359636 |
| 3             | 6             | 0           | -4.044933               | 1.484343  | -0.299292 |
| 4             | 6             | 0           | -3.845863               | 1.020837  | 1.001410  |
| 5             | 6             | 0           | -3.022677               | -0.086422 | 1.237078  |
| 6             | 6             | 0           | -2.387149               | -0.771680 | 0.190341  |
| 7             | 1             | 0           | -3.559406               | 1.162967  | -2.381470 |
| 8             | 1             | 0           | -4.317888               | 1.507865  | 1.848667  |
| 9             | 8             | 0           | -1.963382               | -0.950435 | -2.128097 |
| 10            | 1             | 0           | -2.181669               | -0.529991 | -2.971068 |
| 11            | 8             | 0           | -2.872364               | -0.458561 | 2.547951  |
| 12            | 1             | 0           | -2.345880               | -1.266878 | 2.605438  |
| 13            | 6             | 0           | -1.460087               | -1.947668 | 0.443271  |
| 14            | 6             | 0           | -0.073287               | -1.493860 | 0.844318  |
| 15            | 1             | 0           | -1.427793               | -2.576013 | -0.446999 |
| 16            | 1             | 0           | -1.877494               | -2.588206 | 1.235413  |
| 17            | 6             | 0           | 1.055745                | -1.569157 | 0.124334  |
| 18            | 1             | 0           | -0.015175               | -1.022318 | 1.826507  |
| 19            | 6             | 0           | 2.351470                | -1.011632 | 0.678407  |
| 20            | 1             | 0           | 2.292700                | -0.926848 | 1.769993  |
| 21            | 1             | 0           | 3.177279                | -1.701528 | 0.458233  |
| 22            | 6             | 0           | 2.711236                | 0.378348  | 0.091909  |
| 23            | 6             | 0           | 3.995326                | 0.917580  | 0.660765  |
| 24            | 1             | 0           | 1.887684                | 1.065360  | 0.328505  |
| 25            | 1             | 0           | 2.755279                | 0.315410  | -0.999288 |
| 26            | 6             | 0           | 5.185365                | 1.039213  | 0.051736  |
| 27            | 1             | 0           | 3.936665                | 1.209477  | 1.710798  |
| 28            | 6             | 0           | 6.385947                | 1.583178  | 0.789196  |
| 29            | 1             | 0           | 7.204234                | 0.850872  | 0.799346  |
| 30            | 1             | 0           | 6.780113                | 2.478292  | 0.289740  |
| 31            | 1             | 0           | 6.150465                | 1.846242  | 1.824454  |
| 32            | 6             | 0           | 1.153538                | -2.168469 | -1.258465 |
| 33            | 1             | 0           | 1.729405                | -1.512389 | -1.921587 |
| 34            | 1             | 0           | 0.181290                | -2.330967 | -1.724352 |
| 35            | 1             | 0           | 1.693867                | -3.123737 | -1.224664 |
| 36            | 6             | 0           | 5.460485                | 0.662600  | -1.383785 |
| 37            | 1             | 0           | 5.819323                | 1.532770  | -1.948886 |
| 38            | 1             | 0           | 4.589697                | 0.258108  | -1.902766 |
| 39            | 1             | 0           | 6.260015                | -0.087966 | -1.433174 |
| 40            | 6             | 0           | -4.900641               | 2.700368  | -0.565033 |
| 41            | 1             | 0           | -5.587179               | 2.895979  | 0.263211  |
| 42            | 1             | 0           | -5.490855               | 2.580272  | -1.478923 |
| 43            | 1             | 0           | -4.279399               | 3.594605  | -0.697088 |

Frequencies -- 16.7035            20.0514            27.6056  
 Frequencies -- 37.5058            49.4293            54.0728  
 Frequencies -- 65.3093            91.5509            106.7482

Zero-point correction=            0.372498 (Hartree/Particle)  
 Thermal correction to Energy=    0.394206  
 Thermal correction to Enthalpy=   0.395150  
 Thermal correction to Gibbs Free Energy= 0.318724  
 Sum of electronic and zero-point Energies= -812.399005  
 Sum of electronic and thermal Energies= -812.377297  
 Sum of electronic and thermal Enthalpies= -812.376353  
 Sum of electronic and thermal Free Energies= -812.452779

# Cannabigerocin-ss-1+3t

b-ss-1+4+5+.log

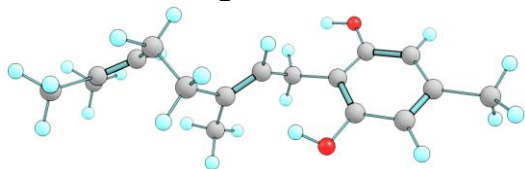

Standard orientation:

| Center Number | Atomic Number | Atomic Type | Coordinates (Angstroms) |           |           |
|---------------|---------------|-------------|-------------------------|-----------|-----------|
|               |               |             | X                       | Y         | Z         |
| 1             | 6             | 0           | -3.262357               | 1.369719  | -0.084152 |
| 2             | 6             | 0           | -4.573128               | 0.930430  | -0.304718 |
| 3             | 6             | 0           | -4.900096               | -0.421008 | -0.184396 |
| 4             | 6             | 0           | -3.890986               | -1.333134 | 0.140349  |
| 5             | 6             | 0           | -2.584684               | -0.890900 | 0.355014  |
| 6             | 6             | 0           | -2.234311               | 0.472894  | 0.259177  |
| 7             | 1             | 0           | -5.325842               | 1.667447  | -0.566158 |
| 8             | 1             | 0           | -4.098710               | -2.395258 | 0.223652  |
| 9             | 8             | 0           | -3.066795               | 2.719434  | -0.214540 |
| 10            | 1             | 0           | -2.138166               | 2.940488  | -0.066712 |
| 11            | 8             | 0           | -1.657907               | -1.842717 | 0.688788  |
| 12            | 1             | 0           | -0.769262               | -1.512213 | 0.463339  |
| 13            | 6             | 0           | -0.811327               | 0.910672  | 0.568409  |
| 14            | 6             | 0           | 0.224672                | 0.214934  | -0.287803 |
| 15            | 1             | 0           | -0.610605               | 0.748638  | 1.632667  |
| 16            | 1             | 0           | -0.693845               | 1.992038  | 0.418848  |
| 17            | 6             | 0           | 1.329323                | -0.441609 | 0.114174  |
| 18            | 1             | 0           | 0.026949                | 0.267970  | -1.358804 |
| 19            | 6             | 0           | 2.269706                | -1.032227 | -0.923180 |
| 20            | 1             | 0           | 2.817769                | -1.874287 | -0.484873 |
| 21            | 1             | 0           | 1.691916                | -1.426685 | -1.766749 |
| 22            | 6             | 0           | 3.297107                | -0.008647 | -1.480428 |
| 23            | 6             | 0           | 4.159965                | 0.637480  | -0.427400 |
| 24            | 1             | 0           | 2.737336                | 0.772499  | -2.009885 |
| 25            | 1             | 0           | 3.907548                | -0.519388 | -2.232288 |
| 26            | 6             | 0           | 5.395618                | 0.276802  | -0.045713 |
| 27            | 1             | 0           | 3.698044                | 1.475351  | 0.095174  |
| 28            | 6             | 0           | 6.122255                | 1.020605  | 1.048918  |
| 29            | 1             | 0           | 6.374714                | 0.346534  | 1.878055  |
| 30            | 1             | 0           | 7.073559                | 1.427776  | 0.681492  |
| 31            | 1             | 0           | 5.528619                | 1.847257  | 1.449513  |
| 32            | 6             | 0           | 1.751010                | -0.628329 | 1.550961  |
| 33            | 1             | 0           | 1.776892                | -1.697025 | 1.798165  |
| 34            | 1             | 0           | 1.099643                | -0.128377 | 2.269657  |
| 35            | 1             | 0           | 2.770525                | -0.253088 | 1.690672  |
| 36            | 6             | 0           | 6.170751                | -0.874938 | -0.636711 |
| 37            | 1             | 0           | 7.127457                | -0.526935 | -1.047436 |
| 38            | 1             | 0           | 5.632714                | -1.401332 | -1.427366 |
| 39            | 1             | 0           | 6.417901                | -1.606077 | 0.143854  |
| 40            | 6             | 0           | -6.322753               | -0.889429 | -0.380449 |
| 41            | 1             | 0           | -6.356294               | -1.891666 | -0.818139 |
| 42            | 1             | 0           | -6.882049               | -0.211215 | -1.031223 |
| 43            | 1             | 0           | -6.853802               | -0.936071 | 0.578247  |

Frequencies -- 12.0189      26.9582      31.1106  
 Frequencies -- 36.4686      45.8049      52.7694  
 Frequencies -- 86.2245      99.1428      121.9701

Zero-point correction= 0.372403 (Hartree/Particle)  
 Thermal correction to Energy= 0.393962  
 Thermal correction to Enthalpy= 0.394907  
 Thermal correction to Gibbs Free Energy= 0.319151  
 Sum of electronic and zero-point Energies= -812.399011  
 Sum of electronic and thermal Energies= -812.377452  
 Sum of electronic and thermal Enthalpies= -812.376508  
 Sum of electronic and thermal Free Energies= -812.452263

# b-ss-1+4+5-.log

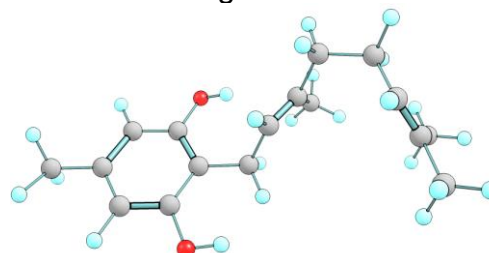

Standard orientation:

| Center Number | Atomic Number | Atomic Type | Coordinates (Angstroms) |           |           |
|---------------|---------------|-------------|-------------------------|-----------|-----------|
|               |               |             | X                       | Y         | Z         |
| 1             | 6             | 0           | -2.744322               | 1.461650  | 0.095971  |
| 2             | 6             | 0           | -4.108737               | 1.300494  | -0.173450 |
| 3             | 6             | 0           | -4.677128               | 0.027107  | -0.229548 |
| 4             | 6             | 0           | -3.855821               | -1.088339 | -0.034673 |
| 5             | 6             | 0           | -2.496043               | -0.922171 | 0.230375  |
| 6             | 6             | 0           | -1.904424               | 0.355899  | 0.318482  |
| 7             | 1             | 0           | -4.710247               | 2.189402  | -0.335114 |
| 8             | 1             | 0           | -4.253637               | -2.096539 | -0.093465 |
| 9             | 8             | 0           | -2.302913               | 2.757943  | 0.140675  |
| 10            | 1             | 0           | -1.345909               | 2.782105  | 0.269952  |
| 11            | 8             | 0           | -1.759378               | -2.060416 | 0.430437  |
| 12            | 1             | 0           | -0.827054               | -1.874996 | 0.216473  |
| 13            | 6             | 0           | -0.434671               | 0.477894  | 0.685438  |
| 14            | 6             | 0           | 0.480112                | -0.239638 | -0.282733 |
| 15            | 1             | 0           | -0.288534               | 0.110420  | 1.706906  |
| 16            | 1             | 0           | -0.124302               | 1.530362  | 0.721883  |
| 17            | 6             | 0           | 1.437388                | -1.141745 | 0.002876  |
| 18            | 1             | 0           | 0.323718                | 0.026677  | -1.327458 |
| 19            | 6             | 0           | 2.281779                | -1.734899 | -1.104247 |
| 20            | 1             | 0           | 2.186633                | -2.829283 | -1.085660 |
| 21            | 1             | 0           | 1.908593                | -1.397208 | -2.077832 |
| 22            | 6             | 0           | 3.785454                | -1.376484 | -0.985272 |
| 23            | 6             | 0           | 4.021352                | 0.107233  | -1.054925 |
| 24            | 1             | 0           | 4.309557                | -1.872102 | -1.814067 |
| 25            | 1             | 0           | 4.192769                | -1.806407 | -0.066048 |
| 26            | 6             | 0           | 4.591179                | 0.908205  | -0.141490 |
| 27            | 1             | 0           | 3.646587                | 0.575417  | -1.967088 |
| 28            | 6             | 0           | 4.711246                | 2.394872  | -0.380082 |
| 29            | 1             | 0           | 4.192823                | 2.958605  | 0.406978  |
| 30            | 1             | 0           | 5.761103                | 2.715037  | -0.347888 |
| 31            | 1             | 0           | 4.292226                | 2.693241  | -1.345266 |
| 32            | 6             | 0           | 1.786062                | -1.598558 | 1.400154  |
| 33            | 1             | 0           | 2.043682                | -2.663078 | 1.403879  |
| 34            | 1             | 0           | 0.976182                | -1.444338 | 2.116131  |
| 35            | 1             | 0           | 2.662987                | -1.056408 | 1.772314  |
| 36            | 6             | 0           | 5.157762                | 0.449421  | 1.180249  |
| 37            | 1             | 0           | 6.215634                | 0.730650  | 1.261929  |
| 38            | 1             | 0           | 5.086218                | -0.628476 | 1.336203  |
| 39            | 1             | 0           | 4.641451                | 0.947122  | 2.011490  |
| 40            | 6             | 0           | -6.156666               | -0.145981 | -0.480244 |
| 41            | 1             | 0           | -6.359279               | -1.048154 | -1.065388 |
| 42            | 1             | 0           | -6.575979               | 0.711347  | -1.014411 |
| 43            | 1             | 0           | -6.704029               | -0.243375 | 0.465369  |

Frequencies -- 16.5607      25.0814      35.2200  
 Frequencies -- 44.6333      53.0606      54.8948  
 Frequencies -- 76.3896      105.2279      131.3438

Zero-point correction= 0.372558 (Hartree/Particle)  
 Thermal correction to Energy= 0.393977  
 Thermal correction to Enthalpy= 0.394921  
 Thermal correction to Gibbs Free Energy= 0.320122  
 Sum of electronic and zero-point Energies= -812.401334  
 Sum of electronic and thermal Energies= -812.379914  
 Sum of electronic and thermal Enthalpies= -812.378970  
 Sum of electronic and thermal Free Energies= -812.453769

b-ss-1+4+5a.log

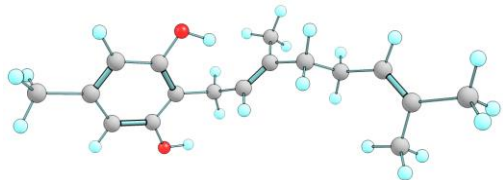

Standard orientation:

| Center Number | Atomic Number | Atomic Type | Coordinates (Angstroms) |           |           |
|---------------|---------------|-------------|-------------------------|-----------|-----------|
|               |               |             | X                       | Y         | Z         |
| 1             | 6             | 0           | 3.317335                | -1.257889 | 0.538305  |
| 2             | 6             | 0           | 4.492062                | -1.177390 | -0.219131 |
| 3             | 6             | 0           | 4.757359                | -0.054052 | -1.003454 |
| 4             | 6             | 0           | 3.818997                | 0.982576  | -1.037131 |
| 5             | 6             | 0           | 2.647546                | 0.895719  | -0.283933 |
| 6             | 6             | 0           | 2.367674                | -0.220222 | 0.533454  |
| 7             | 1             | 0           | 5.190018                | -2.007548 | -0.176225 |
| 8             | 1             | 0           | 3.976922                | 1.864092  | -1.650457 |
| 9             | 8             | 0           | 3.175859                | -2.400315 | 1.281158  |
| 10            | 1             | 0           | 2.335069                | -2.391198 | 1.756577  |
| 11            | 8             | 0           | 1.788357                | 1.961094  | -0.352250 |
| 12            | 1             | 0           | 0.890027                | 1.658736  | -0.126621 |
| 13            | 6             | 0           | 1.112722                | -0.230005 | 1.391290  |
| 14            | 6             | 0           | -0.160763               | -0.063970 | 0.591310  |
| 15            | 1             | 0           | 1.195801                | 0.545919  | 2.159928  |
| 16            | 1             | 0           | 1.028894                | -1.170122 | 1.951880  |
| 17            | 6             | 0           | -1.146169               | 0.832450  | 0.788939  |
| 18            | 1             | 0           | -0.266506               | -0.767117 | -0.234330 |
| 19            | 6             | 0           | -2.371790               | 0.822886  | -0.098732 |
| 20            | 1             | 0           | -2.507973               | 1.820259  | -0.540288 |
| 21            | 1             | 0           | -2.232466               | 0.122836  | -0.929461 |
| 22            | 6             | 0           | -3.668618               | 0.440823  | 0.659145  |
| 23            | 6             | 0           | -4.872932               | 0.481605  | -0.241607 |
| 24            | 1             | 0           | -3.817497               | 1.146291  | 1.486999  |
| 25            | 1             | 0           | -3.531769               | -0.545800 | 1.112428  |
| 26            | 6             | 0           | -5.603696               | -0.546822 | -0.699455 |
| 27            | 1             | 0           | -5.151164               | 1.483328  | -0.573727 |
| 28            | 6             | 0           | -6.778588               | -0.316262 | -1.620170 |
| 29            | 1             | 0           | -6.641155               | -0.848628 | -2.570718 |
| 30            | 1             | 0           | -7.704730               | -0.707940 | -1.178859 |
| 31            | 1             | 0           | -6.928325               | 0.744330  | -1.841437 |
| 32            | 6             | 0           | -1.147609               | 1.865965  | 1.892346  |
| 33            | 1             | 0           | -1.579295               | 2.807083  | 1.534882  |
| 34            | 1             | 0           | -0.149085               | 2.078591  | 2.279753  |
| 35            | 1             | 0           | -1.764202               | 1.533601  | 2.735888  |
| 36            | 6             | 0           | -5.355054               | -1.997460 | -0.366250 |
| 37            | 1             | 0           | -6.235180               | -2.436990 | 0.120941  |
| 38            | 1             | 0           | -4.494529               | -2.153487 | 0.286587  |
| 39            | 1             | 0           | -5.190077               | -2.575791 | -1.284519 |
| 40            | 6             | 0           | 6.043439                | 0.051717  | -1.788634 |
| 41            | 1             | 0           | 5.890823                | 0.580291  | -2.734467 |
| 42            | 1             | 0           | 6.460670                | -0.934793 | -2.009621 |
| 43            | 1             | 0           | 6.800519                | 0.609805  | -1.224142 |

Frequencies -- 12.9147 26.6004 30.9036  
 Frequencies -- 42.8494 46.4316 50.3958  
 Frequencies -- 76.7210 84.3304 111.1931

Zero-point correction= 0.372224 (Hartree/Particle)  
 Thermal correction to Energy= 0.393934  
 Thermal correction to Enthalpy= 0.394878  
 Thermal correction to Gibbs Free Energy= 0.318489  
 Sum of electronic and zero-point Energies= -812.400118  
 Sum of electronic and thermal Energies= -812.378408  
 Sum of electronic and thermal Enthalpies= -812.377464  
 Sum of electronic and thermal Free Energies= -812.453854

b-ss-1+4-5+.log

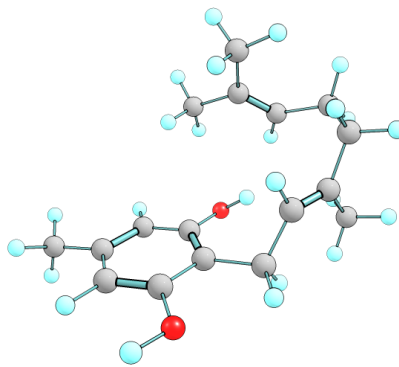

Standard orientation:

| Center Number | Atomic Number | Atomic Type | Coordinates (Angstroms) |           |           |
|---------------|---------------|-------------|-------------------------|-----------|-----------|
|               |               |             | X                       | Y         | Z         |
| 1             | 6             | 0           | 2.628005                | -1.217069 | -0.607177 |
| 2             | 6             | 0           | 3.626628                | -0.238725 | -0.552406 |
| 3             | 6             | 0           | 3.445655                | 0.918017  | 0.213486  |
| 4             | 6             | 0           | 2.243657                | 1.087103  | 0.905155  |
| 5             | 6             | 0           | 1.250679                | 0.105296  | 0.842484  |
| 6             | 6             | 0           | 1.422146                | -1.076579 | 0.099719  |
| 7             | 1             | 0           | 4.548845                | -0.383929 | -1.110393 |
| 8             | 1             | 0           | 2.054011                | 1.979664  | 1.492440  |
| 9             | 8             | 0           | 2.790447                | -2.360662 | -1.346344 |
| 10            | 1             | 0           | 3.660294                | -2.345133 | -1.768409 |
| 11            | 8             | 0           | 0.106069                | 0.324240  | 1.565720  |
| 12            | 1             | 0           | -0.650374               | -0.045290 | 1.075579  |
| 13            | 6             | 0           | 0.350967                | -2.153392 | 0.091591  |
| 14            | 6             | 0           | -0.952013               | -1.652731 | -0.488351 |
| 15            | 1             | 0           | 0.206603                | -2.519791 | 1.113354  |
| 16            | 1             | 0           | 0.711578                | -3.000172 | -0.499504 |
| 17            | 6             | 0           | -2.173942               | -1.644347 | 0.075069  |
| 18            | 1             | 0           | -0.854725               | -1.219172 | -1.483756 |
| 19            | 6             | 0           | -3.337858               | -1.022544 | -0.666188 |
| 20            | 1             | 0           | -3.016763               | -0.753077 | -1.677099 |
| 21            | 1             | 0           | -4.146674               | -1.759111 | -0.771704 |
| 22            | 6             | 0           | -3.919421               | 0.241528  | 0.028936  |
| 23            | 6             | 0           | -2.866689               | 1.251069  | 0.427527  |
| 24            | 1             | 0           | -4.477122               | -0.062046 | 0.921024  |
| 25            | 1             | 0           | -4.655779               | 0.686193  | -0.651686 |
| 26            | 6             | 0           | -2.165584               | 2.048951  | -0.393631 |
| 27            | 1             | 0           | -2.627313               | 1.293504  | 1.489990  |
| 28            | 6             | 0           | -1.082474               | 2.960848  | 0.127244  |
| 29            | 1             | 0           | -0.112439               | 2.697464  | -0.313642 |
| 30            | 1             | 0           | -1.283239               | 4.004594  | -0.147738 |
| 31            | 1             | 0           | -0.977822               | 2.895116  | 1.212312  |
| 32            | 6             | 0           | -2.493926               | -2.186274 | 1.447103  |
| 33            | 1             | 0           | -2.825884               | -1.382535 | 2.115943  |
| 34            | 1             | 0           | -1.649454               | -2.687079 | 1.922782  |
| 35            | 1             | 0           | -3.322229               | -2.902460 | 1.386634  |
| 36            | 6             | 0           | -2.360482               | 2.089740  | -1.889046 |
| 37            | 1             | 0           | -2.447877               | 3.125362  | -2.240134 |
| 38            | 1             | 0           | -3.244115               | 1.542207  | -2.223374 |
| 39            | 1             | 0           | -1.487085               | 1.660830  | -2.398032 |
| 40            | 6             | 0           | 4.540089                | 1.955015  | 0.304553  |
| 41            | 1             | 0           | 4.131924                | 2.949227  | 0.507726  |
| 42            | 1             | 0           | 5.122841                | 2.005537  | -0.620137 |
| 43            | 1             | 0           | 5.238047                | 1.716032  | 1.116392  |

Frequencies -- 21.6160 25.9006 42.3281  
 Frequencies -- 47.4208 58.9234 66.4962  
 Frequencies -- 98.5291 108.6373 113.4402

Zero-point correction= 0.372786 (Hartree/Particle)  
 Thermal correction to Energy= 0.394090  
 Thermal correction to Enthalpy= 0.395034  
 Thermal correction to Gibbs Free Energy= 0.321525  
 Sum of electronic and zero-point Energies= -812.406645  
 Sum of electronic and thermal Energies= -812.385341  
 Sum of electronic and thermal Enthalpies= -812.384397  
 Sum of electronic and thermal Free Energies= -812.457906

b-ss-1+4-5-.log

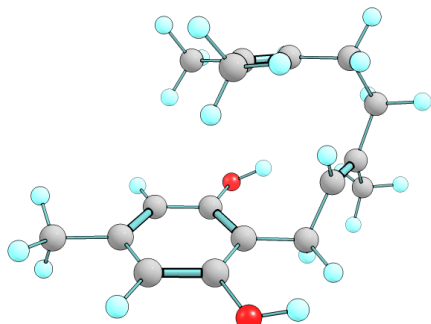

Standard orientation:

| Center Number | Atomic Number | Atomic Type | Coordinates (Angstroms) |           |           |
|---------------|---------------|-------------|-------------------------|-----------|-----------|
|               |               |             | X                       | Y         | Z         |
| 1             | 6             | 0           | -2.153421               | -1.408748 | 0.738681  |
| 2             | 6             | 0           | -3.291630               | -0.603169 | 0.609392  |
| 3             | 6             | 0           | -3.340171               | 0.412209  | -0.346653 |
| 4             | 6             | 0           | -2.217723               | 0.633988  | -1.152418 |
| 5             | 6             | 0           | -1.081282               | -0.162111 | -1.009655 |
| 6             | 6             | 0           | -1.029297               | -1.226592 | -0.085393 |
| 7             | 1             | 0           | -4.132706               | -0.790951 | 1.269292  |
| 8             | 1             | 0           | -2.204154               | 1.430543  | -1.889393 |
| 9             | 8             | 0           | -2.225832               | -2.383268 | 1.699086  |
| 10            | 1             | 0           | -1.368596               | -2.817374 | 1.799117  |
| 11            | 8             | 0           | -0.015451               | 0.114065  | -1.827636 |
| 12            | 1             | 0           | 0.807039                | -0.080830 | -1.341846 |
| 13            | 6             | 0           | 0.202705                | -2.115621 | -0.037700 |
| 14            | 6             | 0           | 1.436419                | -1.337857 | 0.362084  |
| 15            | 1             | 0           | 0.333536                | -2.582926 | -1.018807 |
| 16            | 1             | 0           | 0.057548                | -2.951960 | 0.658979  |
| 17            | 6             | 0           | 2.624474                | -1.285997 | -0.264474 |
| 18            | 1             | 0           | 1.287601                | -0.719588 | 1.241855  |
| 19            | 6             | 0           | 3.746313                | -0.383636 | 0.222932  |
| 20            | 1             | 0           | 4.458828                | -0.988829 | 0.801673  |
| 21            | 1             | 0           | 4.309108                | -0.040518 | -0.656136 |
| 22            | 6             | 0           | 3.332970                | 0.854147  | 1.047060  |
| 23            | 6             | 0           | 2.485334                | 1.807220  | 0.245306  |
| 24            | 1             | 0           | 4.257316                | 1.361814  | 1.355509  |
| 25            | 1             | 0           | 2.837125                | 0.547360  | 1.972281  |
| 26            | 6             | 0           | 1.251398                | 2.266553  | 0.505856  |
| 27            | 1             | 0           | 2.953133                | 2.135925  | -0.685025 |
| 28            | 6             | 0           | 0.549948                | 3.195007  | -0.456009 |
| 29            | 1             | 0           | -0.396815               | 2.753033  | -0.787145 |
| 30            | 1             | 0           | 0.302651                | 4.148664  | 0.028866  |
| 31            | 1             | 0           | 1.156242                | 3.406637  | -1.341213 |
| 32            | 6             | 0           | 2.981400                | -2.099132 | -1.485097 |
| 33            | 1             | 0           | 3.162031                | -1.441320 | -2.344686 |
| 34            | 1             | 0           | 2.218512                | -2.826851 | -1.765685 |
| 35            | 1             | 0           | 3.916488                | -2.645109 | -1.309853 |
| 36            | 6             | 0           | 0.435300                | 1.920557  | 1.727545  |
| 37            | 1             | 0           | 0.099965                | 2.834841  | 2.233393  |
| 38            | 1             | 0           | 0.976794                | 1.316937  | 2.458440  |
| 39            | 1             | 0           | -0.469391               | 1.372216  | 1.435730  |
| 40            | 6             | 0           | -4.582777               | 1.253264  | -0.517684 |
| 41            | 1             | 0           | -4.331804               | 2.286927  | -0.774572 |
| 42            | 1             | 0           | -5.189232               | 1.262951  | 0.392330  |
| 43            | 1             | 0           | -5.210705               | 0.861537  | -1.327330 |

Frequencies -- 23.7312      35.1223      47.6543  
 Frequencies -- 56.5299      62.3031      89.8287  
 Frequencies -- 98.1389      109.2284      142.3774

Zero-point correction= 0.373001 (Hartree/Particle)  
 Thermal correction to Energy= 0.394153  
 Thermal correction to Enthalpy= 0.395097  
 Thermal correction to Gibbs Free Energy= 0.322844  
 Sum of electronic and zero-point Energies= -812.405506  
 Sum of electronic and thermal Energies= -812.384354  
 Sum of electronic and thermal Enthalpies= -812.383410  
 Sum of electronic and thermal Free Energies= -812.455663

b-ss-1+4-5a.log

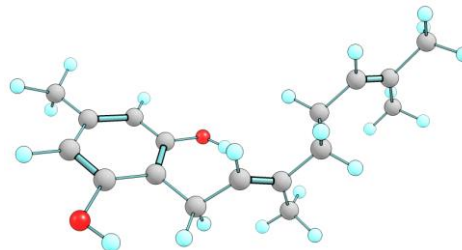

Standard orientation:

| Center Number | Atomic Number | Atomic Type | Coordinates (Angstroms) |           |           |
|---------------|---------------|-------------|-------------------------|-----------|-----------|
|               |               |             | X                       | Y         | Z         |
| 1             | 6             | 0           | -3.663588               | 0.753076  | -0.598898 |
| 2             | 6             | 0           | -4.570379               | -0.313563 | -0.602359 |
| 3             | 6             | 0           | -4.257088               | -1.515084 | 0.034359  |
| 4             | 6             | 0           | -3.012841               | -1.643032 | 0.660254  |
| 5             | 6             | 0           | -2.111088               | -0.578001 | 0.659155  |
| 6             | 6             | 0           | -2.414826               | 0.654585  | 0.041168  |
| 7             | 1             | 0           | -5.519878               | -0.180221 | -1.110952 |
| 8             | 1             | 0           | -2.721616               | -2.567883 | 1.148148  |
| 9             | 8             | 0           | -4.086214               | 1.884419  | -1.245700 |
| 10            | 1             | 0           | -3.388776               | 2.552750  | -1.243584 |
| 11            | 8             | 0           | -0.922106               | -0.778440 | 1.309365  |
| 12            | 1             | 0           | -0.265353               | -0.140368 | 0.977388  |
| 13            | 6             | 0           | -1.421751               | 1.804046  | 0.116461  |
| 14            | 6             | 0           | -0.066744               | 1.434541  | -0.446465 |
| 15            | 1             | 0           | -1.336722               | 2.139123  | 1.155842  |
| 16            | 1             | 0           | -1.793109               | 2.679161  | -0.432560 |
| 17            | 6             | 0           | 1.142145                | 1.583409  | 0.126692  |
| 18            | 1             | 0           | -0.106687               | 0.968174  | -1.430860 |
| 19            | 6             | 0           | 2.378121                | 1.058576  | -0.574797 |
| 20            | 1             | 0           | 2.185352                | 0.947151  | -1.647740 |
| 21            | 1             | 0           | 3.201511                | 1.776341  | -0.469978 |
| 22            | 6             | 0           | 2.843567                | -0.308537 | -0.007763 |
| 23            | 6             | 0           | 4.035029                | -0.849517 | -0.750249 |
| 24            | 1             | 0           | 2.005180                | -1.012933 | -0.096840 |
| 25            | 1             | 0           | 3.051527                | -2.098999 | 1.061597  |
| 26            | 6             | 0           | 5.309628                | -0.912833 | -0.334260 |
| 27            | 1             | 0           | 3.817696                | -1.195790 | -1.761916 |
| 28            | 6             | 0           | 6.393215                | -1.467139 | -1.228173 |
| 29            | 1             | 0           | 7.174410                | -0.716446 | -1.407106 |
| 30            | 1             | 0           | 6.891505                | -2.323511 | -0.754714 |
| 31            | 1             | 0           | 6.003511                | -1.792039 | -2.197041 |
| 32            | 6             | 0           | 1.388867                | 2.226312  | 1.469835  |
| 33            | 1             | 0           | 1.999250                | 1.578143  | 2.108395  |
| 34            | 1             | 0           | 0.474642                | 2.470820  | 2.013116  |
| 35            | 1             | 0           | 1.957301                | 3.154676  | 1.334048  |
| 36            | 6             | 0           | 5.796829                | -0.456142 | 1.019031  |
| 37            | 1             | 0           | 6.261534                | -1.289024 | 1.562584  |
| 38            | 1             | 0           | 5.008573                | -0.039295 | 1.648579  |
| 39            | 1             | 0           | 6.574855                | 0.309587  | 0.904300  |
| 40            | 6             | 0           | -5.248700               | -2.654030 | 0.064228  |
| 41            | 1             | 0           | -4.744840               | -3.622840 | -0.007202 |
| 42            | 1             | 0           | -5.969425               | -2.580436 | -0.755023 |
| 43            | 1             | 0           | -5.816260               | -2.653087 | 1.002885  |

Frequencies -- 19.0394      28.7429      32.0003  
 Frequencies -- 39.2262      50.9480      51.9203  
 Frequencies -- 73.8577      95.4278      106.9868

Zero-point correction= 0.372490 (Hartree/Particle)  
 Thermal correction to Energy= 0.394085  
 Thermal correction to Enthalpy= 0.395030  
 Thermal correction to Gibbs Free Energy= 0.319471  
 Sum of electronic and zero-point Energies= -812.400518  
 Sum of electronic and thermal Energies= -812.378922  
 Sum of electronic and thermal Enthalpies= -812.377978  
 Sum of electronic and thermal Free Energies= -812.453537

b-ss-1+4a5+.log

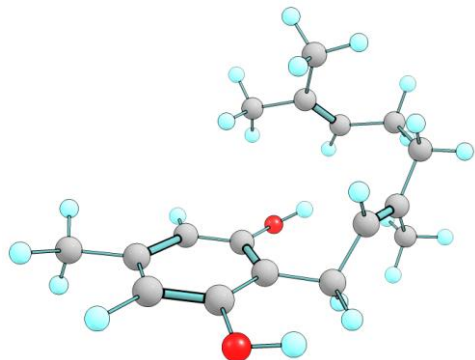

Standard orientation:

| Center Number | Atomic Number | Atomic Type | Coordinates (Angstroms) |           |           |
|---------------|---------------|-------------|-------------------------|-----------|-----------|
|               |               |             | X                       | Y         | Z         |
| 1             | 6             | 0           | -2.584021               | -1.243287 | 0.626177  |
| 2             | 6             | 0           | -3.594383               | -0.274968 | 0.576599  |
| 3             | 6             | 0           | -3.445276               | 0.871068  | -0.205737 |
| 4             | 6             | 0           | -2.255442               | 1.049301  | -0.921447 |
| 5             | 6             | 0           | -1.252746               | 0.081978  | -0.867085 |
| 6             | 6             | 0           | -1.398426               | -1.101743 | -0.115286 |
| 7             | 1             | 0           | -4.492460               | -0.437464 | 1.164284  |
| 8             | 1             | 0           | -2.085692               | 1.939706  | -1.518012 |
| 9             | 8             | 0           | -2.842789               | -2.330157 | 1.420179  |
| 10            | 1             | 0           | -2.054477               | -2.883881 | 1.493382  |
| 11            | 8             | 0           | -0.120147               | 0.303659  | -1.612130 |
| 12            | 1             | 0           | 0.654534                | 0.005207  | -1.103194 |
| 13            | 6             | 0           | -0.302815               | -2.153740 | -0.160814 |
| 14            | 6             | 0           | 0.979560                | -1.659433 | 0.468741  |
| 15            | 1             | 0           | -0.140098               | -2.438621 | -1.204672 |
| 16            | 1             | 0           | -0.625226               | -3.075743 | 0.340833  |
| 17            | 6             | 0           | 2.207992                | -1.609228 | -0.076478 |
| 18            | 1             | 0           | 0.854200                | -1.259336 | 1.474652  |
| 19            | 6             | 0           | 3.343648                | -0.971303 | 0.692986  |
| 20            | 1             | 0           | 2.999504                | -0.723225 | 1.701579  |
| 21            | 1             | 0           | 4.169414                | -1.688043 | 0.801390  |
| 22            | 6             | 0           | 3.902163                | 0.315509  | 0.020153  |
| 23            | 6             | 0           | 2.831652                | 1.296631  | -0.402733 |
| 24            | 1             | 0           | 4.492289                | 0.034311  | -0.858168 |
| 25            | 1             | 0           | 4.606123                | 0.778702  | 0.722238  |
| 26            | 6             | 0           | 2.078062                | 2.062266  | 0.402964  |
| 27            | 1             | 0           | 2.633713                | 1.351533  | -1.473253 |
| 28            | 6             | 0           | 0.993400                | 2.956189  | -0.145032 |
| 29            | 1             | 0           | 0.015587                | 2.672555  | 0.264633  |
| 30            | 1             | 0           | 1.166859                | 4.001458  | 0.142434  |
| 31            | 1             | 0           | 0.923589                | 2.896347  | -1.233329 |
| 32            | 6             | 0           | 2.559745                | -2.110847 | -1.455989 |
| 33            | 1             | 0           | 2.849613                | -1.280497 | -2.111671 |
| 34            | 1             | 0           | 1.746288                | -2.651232 | -1.942223 |
| 35            | 1             | 0           | 3.425597                | -2.781358 | -1.402066 |
| 36            | 6             | 0           | 2.216526                | 2.085134  | 1.905053  |
| 37            | 1             | 0           | 2.255253                | 3.117323  | 2.274144  |
| 38            | 1             | 0           | 3.105848                | 1.562605  | 2.263457  |
| 39            | 1             | 0           | 1.340343                | 1.618562  | 2.374425  |
| 40            | 6             | 0           | -4.549009               | 1.898715  | -0.288697 |
| 41            | 1             | 0           | -4.144261               | 2.912719  | -0.362914 |
| 42            | 1             | 0           | -5.206090               | 1.854271  | 0.584438  |
| 43            | 1             | 0           | -5.170735               | 1.732642  | -1.177028 |

Frequencies -- 24.2533 31.6299 45.6068  
 Frequencies -- 48.1223 59.3740 70.4912  
 Frequencies -- 104.9232 111.4927 113.4447

Zero-point correction= 0.372812 (Hartree/Particle)  
 Thermal correction to Energy= 0.394056  
 Thermal correction to Enthalpy= 0.395001  
 Thermal correction to Gibbs Free Energy= 0.322061  
 Sum of electronic and zero-point Energies= -812.404610  
 Sum of electronic and thermal Energies= -812.383366  
 Sum of electronic and thermal Enthalpies= -812.382422  
 Sum of electronic and thermal Free Energies= -812.455362

b-ss-1+4a5-.log

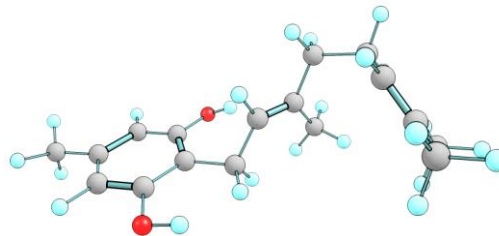

Standard orientation:

| Center Number | Atomic Number | Atomic Type | Coordinates (Angstroms) |           |           |
|---------------|---------------|-------------|-------------------------|-----------|-----------|
|               |               |             | X                       | Y         | Z         |
| 1             | 6             | 0           | -2.744170               | 1.461648  | 0.095951  |
| 2             | 6             | 0           | -4.108583               | 1.300542  | -0.173473 |
| 3             | 6             | 0           | -4.677021               | 0.027166  | -0.229600 |
| 4             | 6             | 0           | -3.855768               | -1.088314 | -0.034760 |
| 5             | 6             | 0           | -2.495977               | -0.922191 | 0.230291  |
| 6             | 6             | 0           | -1.904327               | 0.355837  | 0.318463  |
| 7             | 1             | 0           | -4.710063               | 2.189455  | -0.335209 |
| 8             | 1             | 0           | -4.253591               | -2.096502 | -0.093683 |
| 9             | 8             | 0           | -2.302701               | 2.757898  | 0.140681  |
| 10            | 1             | 0           | -1.345682               | 2.782019  | 0.269845  |
| 11            | 8             | 0           | -1.759333               | -2.060466 | 0.430299  |
| 12            | 1             | 0           | -0.827019               | -1.875070 | 0.216279  |
| 13            | 6             | 0           | -0.434578               | 0.477751  | 0.685456  |
| 14            | 6             | 0           | 0.480209                | -0.239771 | -0.282718 |
| 15            | 1             | 0           | -0.288491               | 0.110222  | 1.706909  |
| 16            | 1             | 0           | -0.124158               | 1.530204  | 0.721998  |
| 17            | 6             | 0           | 1.437436                | -1.141935 | 0.002882  |
| 18            | 1             | 0           | 0.323878                | 0.026620  | -1.327431 |
| 19            | 6             | 0           | 2.281884                | -1.735020 | -1.104229 |
| 20            | 1             | 0           | 2.186860                | -2.829413 | -1.085633 |
| 21            | 1             | 0           | 1.908675                | -1.397370 | -2.077818 |
| 22            | 6             | 0           | 3.785528                | -1.376446 | -0.985255 |
| 23            | 6             | 0           | 4.021268                | 0.107296  | -1.054943 |
| 24            | 1             | 0           | 4.309676                | -1.872037 | -1.814035 |
| 25            | 1             | 0           | 4.192872                | -1.806303 | -0.066014 |
| 26            | 6             | 0           | 4.590886                | 0.908367  | -0.141464 |
| 27            | 1             | 0           | 3.646551                | 0.575401  | -1.967164 |
| 28            | 6             | 0           | 4.710799                | 2.395046  | -0.380087 |
| 29            | 1             | 0           | 4.192254                | 2.958727  | 0.406928  |
| 30            | 1             | 0           | 5.760614                | 2.715333  | -0.347830 |
| 31            | 1             | 0           | 4.291804                | 2.693341  | -1.345302 |
| 32            | 6             | 0           | 1.786024                | -1.598846 | 1.400157  |
| 33            | 1             | 0           | 2.043807                | -2.663324 | 1.403801  |
| 34            | 1             | 0           | 0.976027                | -1.444841 | 2.116047  |
| 35            | 1             | 0           | 2.662814                | -1.056600 | 1.772493  |
| 36            | 6             | 0           | 5.157405                | 0.449698  | 1.180344  |
| 37            | 1             | 0           | 6.215208                | 0.731146  | 1.262141  |
| 38            | 1             | 0           | 5.086072                | -0.628215 | 1.336281  |
| 39            | 1             | 0           | 4.640898                | 0.947282  | 2.011530  |
| 40            | 6             | 0           | -6.156608               | -0.145819 | -0.480080 |
| 41            | 1             | 0           | -6.359447               | -1.048141 | -1.064902 |
| 42            | 1             | 0           | -6.575917               | 0.711424  | -1.014373 |
| 43            | 1             | 0           | -6.703794               | -0.242879 | 0.465682  |

Frequencies -- 16.5349 25.0239 35.1866  
 Frequencies -- 44.6246 53.0935 54.8818  
 Frequencies -- 76.3677 105.1442 131.2652

Zero-point correction= 0.372556 (Hartree/Particle)  
 Thermal correction to Energy= 0.393977  
 Thermal correction to Enthalpy= 0.394921  
 Thermal correction to Gibbs Free Energy= 0.320115  
 Sum of electronic and zero-point Energies= -812.401335  
 Sum of electronic and thermal Energies= -812.379915  
 Sum of electronic and thermal Enthalpies= -812.378970  
 Sum of electronic and thermal Free Energies= -812.453777

b-ss-1+4a5a.log

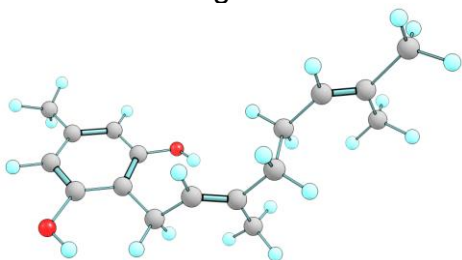

Standard orientation:

| Center Number | Atomic Number | Atomic Type | Coordinates (Angstroms) |           |           |
|---------------|---------------|-------------|-------------------------|-----------|-----------|
|               |               |             | X                       | Y         | Z         |
| 1             | 6             | 0           | -3.663590               | 0.752808  | -0.599139 |
| 2             | 6             | 0           | -4.570157               | -0.314000 | -0.602703 |
| 3             | 6             | 0           | -4.256815               | -1.515387 | 0.034275  |
| 4             | 6             | 0           | -3.012748               | -1.642992 | 0.660575  |
| 5             | 6             | 0           | -2.111199               | -0.577777 | 0.659578  |
| 6             | 6             | 0           | -2.414973               | 0.654636  | 0.041301  |
| 7             | 1             | 0           | -5.519568               | -0.180914 | -1.111528 |
| 8             | 1             | 0           | -2.721493               | -2.567691 | 1.148745  |
| 9             | 8             | 0           | -4.086239               | 1.883993  | -1.246206 |
| 10            | 1             | 0           | -3.389001               | 2.552533  | -1.243759 |
| 11            | 8             | 0           | -0.922379               | -0.777822 | 1.310240  |
| 12            | 1             | 0           | -0.265491               | -0.140109 | 0.977819  |
| 13            | 6             | 0           | -1.422036               | 1.804214  | 0.116565  |
| 14            | 6             | 0           | -0.066990               | 1.434787  | -0.446316 |
| 15            | 1             | 0           | -1.337066               | 2.139402  | 1.155913  |
| 16            | 1             | 0           | -1.793430               | 2.679241  | -0.432571 |
| 17            | 6             | 0           | 1.141872                | 1.583598  | 0.126919  |
| 18            | 1             | 0           | -0.106873               | 0.968565  | -1.430783 |
| 19            | 6             | 0           | 2.377922                | 1.059086  | -0.574667 |
| 20            | 1             | 0           | 2.185080                | 0.947651  | -1.647599 |
| 21            | 1             | 0           | 3.201107                | 1.777109  | -0.469909 |
| 22            | 6             | 0           | 2.843829                | -0.307891 | -0.007749 |
| 23            | 6             | 0           | 4.035225                | -0.848551 | -0.750561 |
| 24            | 1             | 0           | 2.005588                | -1.012500 | -0.096643 |
| 25            | 1             | 0           | 3.052023                | -0.209236 | 1.061560  |
| 26            | 6             | 0           | 5.309743                | -0.912895 | -0.334478 |
| 27            | 1             | 0           | 3.817883                | -1.193712 | -1.762613 |
| 28            | 6             | 0           | 6.393153                | -1.466792 | -1.228858 |
| 29            | 1             | 0           | 7.174708                | -0.716277 | -1.406975 |
| 30            | 1             | 0           | 6.891013                | -2.323867 | -0.756217 |
| 31            | 1             | 0           | 6.003383                | -1.790544 | -2.198086 |
| 32            | 6             | 0           | 1.388501                | 2.226409  | 1.470132  |
| 33            | 1             | 0           | 1.955636                | 3.155569  | 1.334320  |
| 34            | 1             | 0           | 2.000070                | 1.578848  | 2.108159  |
| 35            | 1             | 0           | 0.474257                | 2.469564  | 2.014001  |
| 36            | 6             | 0           | 5.797052                | -0.457878 | 1.019338  |
| 37            | 1             | 0           | 6.261082                | -1.291632 | 1.562133  |
| 38            | 1             | 0           | 5.009001                | -0.041112 | 1.649195  |
| 39            | 1             | 0           | 6.575648                | 0.307408  | 0.905495  |
| 40            | 6             | 0           | -5.248131               | -2.654600 | 0.063798  |
| 41            | 1             | 0           | -4.743943               | -3.623273 | -0.007250 |
| 42            | 1             | 0           | -5.968414               | -2.581337 | -0.755875 |
| 43            | 1             | 0           | -5.816210               | -2.653711 | 1.002132  |

Frequencies -- 18.9418      28.7616      31.9083  
 Frequencies -- 39.1616      50.8807      51.9444  
 Frequencies -- 73.8714      95.4556      106.7223

Zero-point correction= 0.372487 (Hartree/Particle)  
 Thermal correction to Energy= 0.394084  
 Thermal correction to Enthalpy= 0.395028  
 Thermal correction to Gibbs Free Energy= 0.319456  
 Sum of electronic and zero-point Energies= -812.400521  
 Sum of electronic and thermal Energies= -812.378924  
 Sum of electronic and thermal Enthalpies= -812.377980  
 Sum of electronic and thermal Free Energies= -812.453551

Cannabigerocin-ss-1a3t  
 b-ss-1a4+5+.log

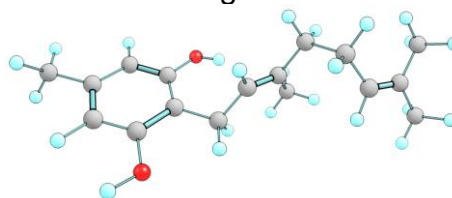

Standard orientation:

| Center Number | Atomic Number | Atomic Type | Coordinates (Angstroms) |           |           |
|---------------|---------------|-------------|-------------------------|-----------|-----------|
|               |               |             | X                       | Y         | Z         |
| 1             | 6             | 0           | -2.576769               | -0.897565 | 0.343851  |
| 2             | 6             | 0           | -3.893805               | -1.337038 | 0.160256  |
| 3             | 6             | 0           | -4.904678               | -0.427078 | -0.147729 |
| 4             | 6             | 0           | -4.577528               | 0.928506  | -0.279450 |
| 5             | 6             | 0           | -3.261754               | 1.358561  | -0.091525 |
| 6             | 6             | 0           | -2.228400               | 0.460012  | 0.231205  |
| 7             | 1             | 0           | -4.103692               | -2.397348 | 0.258299  |
| 8             | 1             | 0           | -5.349238               | 1.654524  | -0.524992 |
| 9             | 8             | 0           | -1.649240               | -1.852833 | 0.660489  |
| 10            | 1             | 0           | -0.760259               | -1.507400 | 0.457449  |
| 11            | 8             | 0           | -2.923197               | 2.683126  | -0.200909 |
| 12            | 1             | 0           | -3.712882               | 3.194881  | -0.423479 |
| 13            | 6             | 0           | -0.810336               | 0.938645  | 0.495575  |
| 14            | 6             | 0           | 0.231063                | 0.201954  | -0.316736 |
| 15            | 1             | 0           | -0.595467               | 0.855657  | 1.566871  |
| 16            | 1             | 0           | -0.755399               | 2.004458  | 0.254595  |
| 17            | 6             | 0           | 1.330063                | -0.442965 | 0.119095  |
| 18            | 1             | 0           | 0.047021                | 0.211643  | -1.392022 |
| 19            | 6             | 0           | 2.280989                | -1.070656 | -0.887033 |
| 20            | 1             | 0           | 2.824503                | -1.896954 | -0.413991 |
| 21            | 1             | 0           | 1.711558                | -1.494987 | -1.721914 |
| 22            | 6             | 0           | 3.314238                | -0.068249 | -1.470770 |
| 23            | 6             | 0           | 4.164569                | 0.617077  | -0.432945 |
| 24            | 1             | 0           | 2.759376                | 0.692716  | -2.034027 |
| 25            | 1             | 0           | 3.933102                | -0.604994 | -2.197293 |
| 26            | 6             | 0           | 5.405535                | 0.288249  | -0.039924 |
| 27            | 1             | 0           | 3.687236                | 1.460112  | 0.067011  |
| 28            | 6             | 0           | 6.116232                | 1.072337  | 1.036976  |
| 29            | 1             | 0           | 6.378397                | 0.424214  | 1.883673  |
| 30            | 1             | 0           | 7.061335                | 1.486564  | 0.661418  |
| 31            | 1             | 0           | 5.507580                | 1.898535  | 1.415484  |
| 32            | 6             | 0           | 1.735716                | -0.581095 | 1.566303  |
| 33            | 1             | 0           | 1.753305                | -1.640645 | 1.851473  |
| 34            | 1             | 0           | 1.077142                | -0.054007 | 2.258632  |
| 35            | 1             | 0           | 2.755261                | -0.205925 | 1.706369  |
| 36            | 6             | 0           | 6.203769                | -0.863268 | -0.599880 |
| 37            | 1             | 0           | 7.154373                | -0.507458 | -1.018099 |
| 38            | 1             | 0           | 5.677881                | -1.420188 | -1.377622 |
| 39            | 1             | 0           | 6.463670                | -1.569135 | 0.199615  |
| 40            | 6             | 0           | -6.330901               | -0.883632 | -0.346460 |
| 41            | 1             | 0           | -6.691550               | -0.627893 | -1.349193 |
| 42            | 1             | 0           | -7.003797               | -0.396700 | 0.368501  |
| 43            | 1             | 0           | -6.427975               | -1.964781 | -0.218257 |

Frequencies -- 15.7533      26.0754      27.8689  
 Frequencies -- 32.5737      37.6981      55.1217  
 Frequencies -- 87.6437      100.6302      127.5615

Zero-point correction= 0.372693 (Hartree/Particle)  
 Thermal correction to Energy= 0.394162  
 Thermal correction to Enthalpy= 0.395106  
 Thermal correction to Gibbs Free Energy= 0.319491  
 Sum of electronic and zero-point Energies= -812.401101  
 Sum of electronic and thermal Energies= -812.379632  
 Sum of electronic and thermal Enthalpies= -812.378687  
 Sum of electronic and thermal Free Energies= -812.454303



b-ss-1a4+5-.log

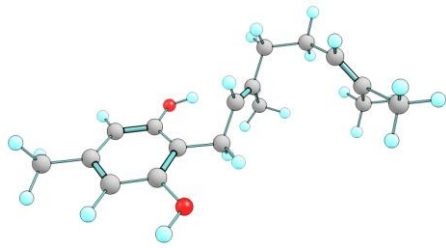

Standard orientation:

| Center Number | Atomic Number | Atomic Type | Coordinates (Angstroms) |           |           |
|---------------|---------------|-------------|-------------------------|-----------|-----------|
|               |               |             | X                       | Y         | Z         |
| 1             | 6             | 0           | -2.487728               | -0.931832 | 0.203122  |
| 2             | 6             | 0           | -3.853841               | -1.098864 | -0.047202 |
| 3             | 6             | 0           | -4.681378               | 0.012913  | -0.215279 |
| 4             | 6             | 0           | -4.120047               | 1.292150  | -0.134136 |
| 5             | 6             | 0           | -2.753597               | 1.449755  | 0.118800  |
| 6             | 6             | 0           | -1.904230               | 0.345156  | 0.301175  |
| 7             | 1             | 0           | -4.249745               | -2.107558 | -0.111029 |
| 8             | 1             | 0           | -4.746196               | 2.172125  | -0.262147 |
| 9             | 8             | 0           | -1.748548               | -2.071089 | 0.376160  |
| 10            | 1             | 0           | -0.809488               | -1.864713 | 0.213625  |
| 11            | 8             | 0           | -2.187401               | 2.694816  | 0.217733  |
| 12            | 1             | 0           | -2.868301               | 3.365673  | 0.071807  |
| 13            | 6             | 0           | -0.433710               | 0.515733  | 0.642549  |
| 14            | 6             | 0           | 0.485931                | -0.249150 | -0.282428 |
| 15            | 1             | 0           | -0.265888               | 0.223796  | 1.685537  |
| 16            | 1             | 0           | -0.184694               | 1.579490  | 0.582716  |
| 17            | 6             | 0           | 1.444181                | -1.135597 | 0.047174  |
| 18            | 1             | 0           | 0.336500                | -0.033755 | -1.340383 |
| 19            | 6             | 0           | 2.296039                | -1.776421 | -1.027439 |
| 20            | 1             | 0           | 2.202482                | -2.869243 | -0.961207 |
| 21            | 1             | 0           | 1.927651                | -1.483068 | -2.017226 |
| 22            | 6             | 0           | 3.798915                | -1.411815 | -0.918223 |
| 23            | 6             | 0           | 4.035345                | 0.067068  | -1.056188 |
| 24            | 1             | 0           | 4.327654                | -1.945252 | -1.720294 |
| 25            | 1             | 0           | 4.202162                | -1.797725 | 0.022076  |
| 26            | 6             | 0           | 4.600601                | 0.909948  | -0.178300 |
| 27            | 1             | 0           | 3.665617                | 0.492098  | -1.991256 |
| 28            | 6             | 0           | 4.722971                | 2.383831  | -0.485076 |
| 29            | 1             | 0           | 4.200132                | 2.983840  | 0.271654  |
| 30            | 1             | 0           | 5.772831                | 2.704816  | -0.461643 |
| 31            | 1             | 0           | 4.309862                | 2.637282  | -1.465539 |
| 32            | 6             | 0           | 1.785238                | -1.529457 | 1.465604  |
| 33            | 1             | 0           | 2.037670                | -2.594091 | 1.519705  |
| 34            | 1             | 0           | 0.972201                | -1.338400 | 2.169038  |
| 35            | 1             | 0           | 2.663160                | -0.975307 | 1.817576  |
| 36            | 6             | 0           | 5.158883                | 0.513175  | 1.166873  |
| 37            | 1             | 0           | 6.215932                | 0.799278  | 1.242717  |
| 38            | 1             | 0           | 5.087053                | -0.556488 | 1.371485  |
| 39            | 1             | 0           | 4.636328                | 1.047778  | 1.970835  |
| 40            | 6             | 0           | -6.150372               | -0.159471 | -0.522281 |
| 41            | 1             | 0           | -6.743608               | 0.665196  | -0.115952 |
| 42            | 1             | 0           | -6.536948               | -1.096174 | -0.110553 |
| 43            | 1             | 0           | -6.323976               | -0.182155 | -1.605161 |

Frequencies -- 15.4900 26.0603 31.3899  
 Frequencies -- 35.7135 45.3411 57.8837  
 Frequencies -- 73.7936 108.1444 127.5252

Zero-point correction= 0.372834 (Hartree/Particle)  
 Thermal correction to Energy= 0.394186  
 Thermal correction to Enthalpy= 0.395130  
 Thermal correction to Gibbs Free Energy= 0.320099  
 Sum of electronic and zero-point Energies= -812.403396  
 Sum of electronic and thermal Energies= -812.382045  
 Sum of electronic and thermal Enthalpies= -812.381101  
 Sum of electronic and thermal Free Energies= -812.456131

b-ss-1a4+5a.log

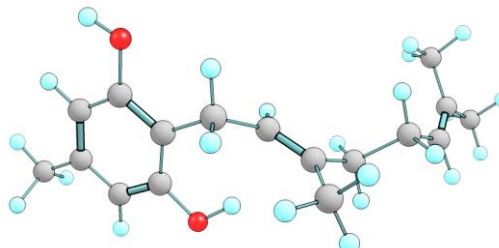

Standard orientation:

| Center Number | Atomic Number | Atomic Type | Coordinates (Angstroms) |           |           |
|---------------|---------------|-------------|-------------------------|-----------|-----------|
|               |               |             | X                       | Y         | Z         |
| 1             | 6             | 0           | 2.619682                | 0.885550  | -0.347864 |
| 2             | 6             | 0           | 3.794776                | 0.944224  | -1.101333 |
| 3             | 6             | 0           | 4.746526                | -0.075043 | -1.006035 |
| 4             | 6             | 0           | 4.497146                | -1.154078 | -0.153673 |
| 5             | 6             | 0           | 3.318016                | -1.203302 | 0.599960  |
| 6             | 6             | 0           | 2.353828                | -0.185731 | 0.527994  |
| 7             | 1             | 0           | 3.946218                | 1.792708  | -1.761443 |
| 8             | 1             | 0           | 5.220840                | -1.961221 | -0.067615 |
| 9             | 8             | 0           | 1.747505                | 1.932396  | -0.481344 |
| 10            | 1             | 0           | 0.863149                | 1.646075  | -0.187552 |
| 11            | 8             | 0           | 3.064453                | -2.246029 | 1.453782  |
| 12            | 1             | 0           | 3.797811                | -2.874886 | 1.413948  |
| 13            | 6             | 0           | 1.104504                | -0.209450 | 1.392263  |
| 14            | 6             | 0           | -0.173610               | -0.036430 | 0.602952  |
| 15            | 1             | 0           | 1.186590                | 0.556129  | 2.172321  |
| 16            | 1             | 0           | 1.064751                | -1.169752 | 1.915249  |
| 17            | 6             | 0           | -1.157177               | 0.862569  | 0.800310  |
| 18            | 1             | 0           | -0.290476               | -0.742639 | -0.219362 |
| 19            | 6             | 0           | -2.390337               | 0.845294  | -0.077529 |
| 20            | 1             | 0           | -2.547122               | 1.844875  | -0.507089 |
| 21            | 1             | 0           | -2.246649               | 0.156807  | -0.917261 |
| 22            | 6             | 0           | -3.675266               | 0.431407  | 0.684535  |
| 23            | 6             | 0           | -4.886701               | 0.458293  | -0.207419 |
| 24            | 1             | 0           | -3.832121               | 1.124402  | 1.521213  |
| 25            | 1             | 0           | -3.516215               | -0.557419 | 1.125781  |
| 26            | 6             | 0           | -5.579822               | -0.581410 | -0.697290 |
| 27            | 1             | 0           | -5.204151               | 1.459157  | -0.505082 |
| 28            | 6             | 0           | -6.767291               | -0.366008 | -1.605422 |
| 29            | 1             | 0           | -6.613231               | -0.858961 | -2.574527 |
| 30            | 1             | 0           | -7.675009               | -0.809630 | -1.175116 |
| 31            | 1             | 0           | -6.960202               | 0.694819  | -1.788943 |
| 32            | 6             | 0           | -1.150517               | 1.905317  | 1.894508  |
| 33            | 1             | 0           | -1.541568               | 2.857318  | 1.518402  |
| 34            | 1             | 0           | -0.155122               | 2.087203  | 2.304439  |
| 35            | 1             | 0           | -1.798999               | 1.602957  | 2.725487  |
| 36            | 6             | 0           | -5.272428               | -2.031686 | -0.415319 |
| 37            | 1             | 0           | -6.134106               | -2.524298 | 0.053721  |
| 38            | 1             | 0           | -4.406505               | -2.175383 | 0.233184  |
| 39            | 1             | 0           | -5.082858               | -2.569325 | -1.353386 |
| 40            | 6             | 0           | 6.016380                | -0.008862 | -1.821903 |
| 41            | 1             | 0           | 6.658856                | -0.874006 | -1.638497 |
| 42            | 1             | 0           | 6.589756                | 0.894489  | -1.585381 |
| 43            | 1             | 0           | 5.794448                | 0.025722  | -2.894417 |

Frequencies -- 11.8044 24.6069 31.2892  
 Frequencies -- 38.0940 41.8618 52.4454  
 Frequencies -- 80.6151 85.9723 118.8669

Zero-point correction= 0.374550 (Hartree/Particle)  
 Thermal correction to Energy= 0.396022  
 Thermal correction to Enthalpy= 0.396966  
 Thermal correction to Gibbs Free Energy= 0.320804  
 Sum of electronic and zero-point Energies= -812.131713  
 Sum of electronic and thermal Energies= -812.110241  
 Sum of electronic and thermal Enthalpies= -812.109296  
 Sum of electronic and thermal Free Energies= -812.185458

b-ss-1a4-5+.log

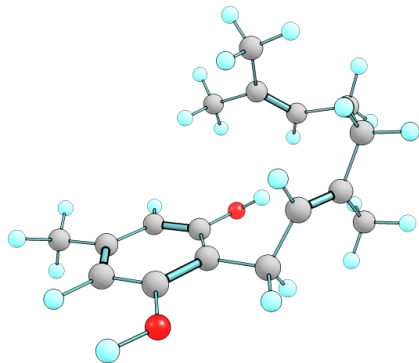

Standard orientation:

| Center Number | Atomic Number | Atomic Type | Coordinates (Angstroms) |           |           |
|---------------|---------------|-------------|-------------------------|-----------|-----------|
|               |               |             | X                       | Y         | Z         |
| 1             | 6             | 0           | -1.250599               | 0.105135  | -0.842560 |
| 2             | 6             | 0           | -2.243499               | 1.087010  | -0.905282 |
| 3             | 6             | 0           | -3.445472               | 0.918093  | -0.213522 |
| 4             | 6             | 0           | -3.626481               | -0.238545 | 0.552518  |
| 5             | 6             | 0           | -2.627938               | -1.216979 | 0.607320  |
| 6             | 6             | 0           | -1.422126               | -1.076673 | -0.099699 |
| 7             | 1             | 0           | -2.053799               | 1.979513  | -1.492643 |
| 8             | 1             | 0           | -4.548682               | -0.383619 | 1.110567  |
| 9             | 8             | 0           | -0.105986               | 0.323911  | -1.565856 |
| 10            | 1             | 0           | 0.650434                | -0.045416 | -1.075533 |
| 11            | 8             | 0           | -2.790496               | -2.360544 | 1.346503  |
| 12            | 1             | 0           | -3.659928               | -2.344438 | 1.769403  |
| 13            | 6             | 0           | -0.351023               | -2.153576 | -0.091476 |
| 14            | 6             | 0           | 0.951973                | -1.652913 | 0.488423  |
| 15            | 1             | 0           | -0.206676               | -2.520102 | -1.113193 |
| 16            | 1             | 0           | -0.711698               | -3.000251 | 0.499732  |
| 17            | 6             | 0           | 2.173857                | -1.644326 | -0.075090 |
| 18            | 1             | 0           | 0.854707                | -1.219461 | 1.483880  |
| 19            | 6             | 0           | 3.337777                | -1.022508 | 0.666153  |
| 20            | 1             | 0           | 3.016665                | -0.753007 | 1.677053  |
| 21            | 1             | 0           | 4.146570                | -1.759101 | 0.771702  |
| 22            | 6             | 0           | 3.919348                | 0.241539  | -0.028971 |
| 23            | 6             | 0           | 2.866549                | 1.251042  | -0.427516 |
| 24            | 1             | 0           | 4.477011                | -0.062038 | -0.921085 |
| 25            | 1             | 0           | 4.655722                | 0.686209  | 0.651627  |
| 26            | 6             | 0           | 2.165478                | 2.048935  | 0.393665  |
| 27            | 1             | 0           | 2.627056                | 1.293395  | -1.489956 |
| 28            | 6             | 0           | 1.082198                | 2.960672  | -0.127146 |
| 29            | 1             | 0           | 0.112234                | 2.697118  | 0.313797  |
| 30            | 1             | 0           | 1.282798                | 4.004457  | 0.147815  |
| 31            | 1             | 0           | 0.977487                | 2.894916  | -1.212207 |
| 32            | 6             | 0           | 2.493788                | -2.186047 | -1.447220 |
| 33            | 1             | 0           | 2.824876                | -1.382072 | -2.116220 |
| 34            | 1             | 0           | 1.649540                | -2.687537 | -1.922577 |
| 35            | 1             | 0           | 3.322681                | -2.901571 | -1.387012 |
| 36            | 6             | 0           | 2.360602                | 2.089971  | 1.889042  |
| 37            | 1             | 0           | 2.448691                | 3.125643  | 2.239826  |
| 38            | 1             | 0           | 3.243945                | 1.541995  | 2.223405  |
| 39            | 1             | 0           | 1.487000                | 1.661762  | 2.398270  |
| 40            | 6             | 0           | -4.539872               | 1.955105  | -0.304781 |
| 41            | 1             | 0           | -5.123915               | 2.004430  | 0.619147  |
| 42            | 1             | 0           | -5.236660               | 1.717020  | -1.117899 |
| 43            | 1             | 0           | -4.131552               | 2.949606  | -0.506231 |

Frequencies -- 21.6398 25.9208 42.3772  
 Frequencies -- 47.6654 59.0210 66.5515  
 Frequencies -- 98.6542 108.6444 113.4643

Zero-point correction= 0.372788 (Hartree/Particle)  
 Thermal correction to Energy= 0.394090  
 Thermal correction to Enthalpy= 0.395034  
 Thermal correction to Gibbs Free Energy= 0.321537  
 Sum of electronic and zero-point Energies= -812.406643  
 Sum of electronic and thermal Energies= -812.385341  
 Sum of electronic and thermal Enthalpies= -812.384397  
 Sum of electronic and thermal Free Energies= -812.457894

b-ss-1a4-5-.log

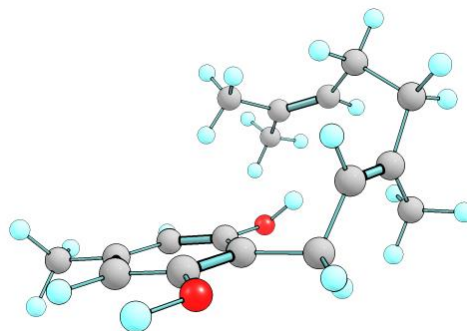

Standard orientation:

| Center Number | Atomic Number | Atomic Type | Coordinates (Angstroms) |           |           |
|---------------|---------------|-------------|-------------------------|-----------|-----------|
|               |               |             | X                       | Y         | Z         |
| 1             | 6             | 0           | -1.166608               | 0.268221  | -0.754189 |
| 2             | 6             | 0           | -2.126822               | 1.278735  | -0.638334 |
| 3             | 6             | 0           | -3.355820               | 1.015071  | -0.031434 |
| 4             | 6             | 0           | -3.600444               | -0.271108 | 0.465353  |
| 5             | 6             | 0           | -2.638032               | -1.276210 | 0.336175  |
| 6             | 6             | 0           | -1.403269               | -1.036366 | -0.293140 |
| 7             | 1             | 0           | -1.888533               | 2.266594  | -1.019305 |
| 8             | 1             | 0           | -4.546373               | -0.495137 | 0.953381  |
| 9             | 8             | 0           | 0.014148                | 0.596670  | -1.375699 |
| 10            | 1             | 0           | 0.748250                | 0.140844  | -0.928552 |
| 11            | 8             | 0           | -2.862519               | -2.544939 | 0.804404  |
| 12            | 1             | 0           | -3.751982               | -2.592149 | 1.180903  |
| 13            | 6             | 0           | -0.380669               | -2.136875 | -0.512280 |
| 14            | 6             | 0           | 0.897221                | -1.916610 | 0.264587  |
| 15            | 1             | 0           | -0.172199               | -2.215093 | -1.584117 |
| 16            | 1             | 0           | -0.823411               | -3.089717 | -0.208789 |
| 17            | 6             | 0           | 2.139161                | -1.728375 | -0.214078 |
| 18            | 1             | 0           | 0.765014                | -1.897607 | 1.347180  |
| 19            | 6             | 0           | 3.296071                | -1.488082 | 0.746976  |
| 20            | 1             | 0           | 3.306134                | -2.259826 | 1.525485  |
| 21            | 1             | 0           | 4.243827                | -1.580111 | 0.203617  |
| 22            | 6             | 0           | 3.241002                | -0.099917 | 1.431841  |
| 23            | 6             | 0           | 3.177219                | 1.029013  | 0.440442  |
| 24            | 1             | 0           | 4.137545                | 0.004586  | 2.059944  |
| 25            | 1             | 0           | 2.383159                | -0.076202 | 2.109342  |
| 26            | 6             | 0           | 2.260204                | 2.006947  | 0.353169  |
| 27            | 1             | 0           | 3.975356                | 1.022045  | -0.304415 |
| 28            | 6             | 0           | 2.324785                | 3.035619  | -0.749733 |
| 29            | 1             | 0           | 1.428747                | 2.959984  | -1.377669 |
| 30            | 1             | 0           | 2.344986                | 4.054596  | -0.341840 |
| 31            | 1             | 0           | 3.203914                | 2.902651  | -1.386902 |
| 32            | 6             | 0           | 2.509100                | -1.701527 | -1.677548 |
| 33            | 1             | 0           | 3.024079                | -0.762037 | -1.914110 |
| 34            | 1             | 0           | 1.655324                | -1.796928 | -2.350624 |
| 35            | 1             | 0           | 3.214698                | -2.509842 | -1.905675 |
| 36            | 6             | 0           | 1.102457                | 2.196201  | 1.302375  |
| 37            | 1             | 0           | 1.006246                | 1.396581  | 2.038908  |
| 38            | 1             | 0           | 0.161097                | 2.255647  | 0.745827  |
| 39            | 1             | 0           | 1.211146                | 3.143997  | 1.845753  |
| 40            | 6             | 0           | -4.405769               | 2.092311  | 0.105067  |
| 41            | 1             | 0           | -4.677716               | 2.248500  | 1.154974  |
| 42            | 1             | 0           | -5.324417               | 1.816611  | -0.425265 |
| 43            | 1             | 0           | -4.056632               | 3.045875  | -0.299202 |

Frequencies -- 30.0617 38.1913 50.1589  
 Frequencies -- 57.0299 70.8461 84.0881  
 Frequencies -- 99.7699 116.4619 144.3144

Zero-point correction= 0.373308 (Hartree/Particle)  
 Thermal correction to Energy= 0.394305  
 Thermal correction to Enthalpy= 0.395250  
 Thermal correction to Gibbs Free Energy= 0.323713  
 Sum of electronic and zero-point Energies= -812.406695  
 Sum of electronic and thermal Energies= -812.385698  
 Sum of electronic and thermal Enthalpies= -812.384754  
 Sum of electronic and thermal Free Energies= -812.456290

b-ss-1a4-5a.log

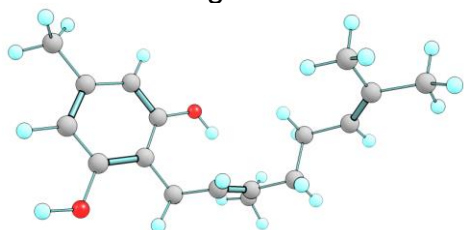

Standard orientation:

| Center Number | Atomic Number | Atomic Type | Coordinates (Angstroms) |           |           |
|---------------|---------------|-------------|-------------------------|-----------|-----------|
|               |               |             | X                       | Y         | Z         |
| 1             | 6             | 0           | 1.846530                | 0.382403  | 0.762511  |
| 2             | 6             | 0           | 2.649645                | 1.513968  | 0.943071  |
| 3             | 6             | 0           | 3.857702                | 1.641196  | 0.255957  |
| 4             | 6             | 0           | 4.249128                | 0.619883  | -0.616751 |
| 5             | 6             | 0           | 3.441375                | -0.508039 | -0.790834 |
| 6             | 6             | 0           | 2.222817                | -0.660147 | -0.106211 |
| 7             | 1             | 0           | 2.309207                | 2.286047  | 1.625924  |
| 8             | 1             | 0           | 5.186925                | 0.696884  | -1.162064 |
| 9             | 8             | 0           | 0.689809                | 0.333182  | 1.492394  |
| 10            | 1             | 0           | 0.103536                | -0.346055 | 1.111397  |
| 11            | 8             | 0           | 3.814835                | -1.526099 | -1.630334 |
| 12            | 1             | 0           | 4.659501                | -1.302239 | -2.044272 |
| 13            | 6             | 0           | 1.376114                | -1.913207 | -0.268816 |
| 14            | 6             | 0           | -0.073771               | -1.601071 | -0.562001 |
| 15            | 1             | 0           | 1.467351                | -2.535535 | 0.628838  |
| 16            | 1             | 0           | 1.790419                | -2.502956 | -1.091880 |
| 17            | 6             | 0           | -1.172697               | -2.030179 | 0.087071  |
| 18            | 1             | 0           | -0.219614               | -0.914535 | -1.396974 |
| 19            | 6             | 0           | -2.536523               | -1.504838 | -0.313754 |
| 20            | 1             | 0           | -2.519404               | -1.147423 | -1.348985 |
| 21            | 1             | 0           | -3.278950               | -2.312233 | -0.265330 |
| 22            | 6             | 0           | -2.999140               | -0.338181 | 0.598170  |
| 23            | 6             | 0           | -4.382456               | 0.139792  | 0.251750  |
| 24            | 1             | 0           | -2.260266               | 0.466476  | 0.528027  |
| 25            | 1             | 0           | -2.988104               | -0.677312 | 1.642800  |
| 26            | 6             | 0           | -4.736546               | 1.293340  | -0.336082 |
| 27            | 1             | 0           | -5.177510               | -0.567976 | 0.492353  |
| 28            | 6             | 0           | -6.184943               | 1.604250  | -0.629826 |
| 29            | 1             | 0           | -6.497153               | 2.528067  | -0.124885 |
| 30            | 1             | 0           | -6.338716               | 1.772993  | -1.703926 |
| 31            | 1             | 0           | -6.853165               | 0.799043  | -0.311408 |
| 32            | 6             | 0           | -1.168572               | -2.990439 | 1.251321  |
| 33            | 1             | 0           | -1.746664               | -2.589480 | 2.091630  |
| 34            | 1             | 0           | -0.168032               | -3.230882 | 1.614460  |
| 35            | 1             | 0           | -1.655082               | -3.929130 | 0.958273  |
| 36            | 6             | 0           | -3.773139               | 2.375902  | -0.757091 |
| 37            | 1             | 0           | -3.873668               | 2.577732  | -1.831325 |
| 38            | 1             | 0           | -2.728495               | 2.129910  | -0.558864 |
| 39            | 1             | 0           | -4.003813               | 3.318141  | -0.243142 |
| 40            | 6             | 0           | 4.711005                | 2.876906  | 0.419112  |
| 41            | 1             | 0           | 5.774053                | 2.648128  | 0.297807  |
| 42            | 1             | 0           | 4.568210                | 3.333902  | 1.402564  |
| 43            | 1             | 0           | 4.453106                | 3.632528  | -0.333090 |

Frequencies -- 17.2125 18.9064 30.0920  
 Frequencies -- 42.5926 46.5081 52.4544  
 Frequencies -- 77.8827 97.2340 120.6772

Zero-point correction= 0.372534 (Hartree/Particle)  
 Thermal correction to Energy= 0.394091  
 Thermal correction to Enthalpy= 0.395035  
 Thermal correction to Gibbs Free Energy= 0.319176  
 Sum of electronic and zero-point Energies= -812.402983  
 Sum of electronic and thermal Energies= -812.381426  
 Sum of electronic and thermal Enthalpies= -812.380482  
 Sum of electronic and thermal Free Energies= -812.456341

b-ss-1a4a5+.log

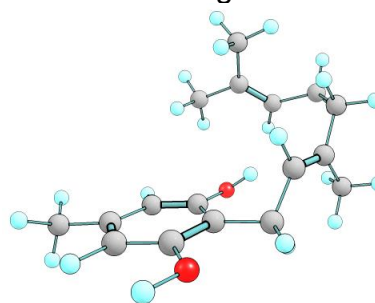

Standard orientation:

| Center Number | Atomic Number | Atomic Type | Coordinates (Angstroms) |           |           |
|---------------|---------------|-------------|-------------------------|-----------|-----------|
|               |               |             | X                       | Y         | Z         |
| 1             | 6             | 0           | -1.250646               | 0.105129  | -0.842594 |
| 2             | 6             | 0           | -2.243632               | 1.086940  | -0.905321 |
| 3             | 6             | 0           | -3.445564               | 0.917948  | -0.213561 |
| 4             | 6             | 0           | -3.626485               | -0.238705 | 0.552504  |
| 5             | 6             | 0           | -2.627879               | -1.217035 | 0.607333  |
| 6             | 6             | 0           | -1.422058               | -1.076638 | -0.099684 |
| 7             | 1             | 0           | -2.053985               | 1.979435  | -1.492704 |
| 8             | 1             | 0           | -4.548669               | -0.383815 | 1.110567  |
| 9             | 8             | 0           | -0.106089               | 0.323991  | -1.565956 |
| 10            | 1             | 0           | 0.650407                | -0.045312 | -1.075715 |
| 11            | 8             | 0           | -2.790294               | -2.360581 | 1.346574  |
| 12            | 1             | 0           | -3.659896               | -2.344771 | 1.769138  |
| 13            | 6             | 0           | -0.350870               | -2.153437 | -0.091419 |
| 14            | 6             | 0           | 0.952121                | -1.652642 | 0.488385  |
| 15            | 1             | 0           | -0.206535               | -2.520034 | -1.113115 |
| 16            | 1             | 0           | -0.711435               | -3.000120 | 0.499844  |
| 17            | 6             | 0           | 2.174020                | -1.644266 | -0.075093 |
| 18            | 1             | 0           | 0.854864                | -1.218968 | 1.483742  |
| 19            | 6             | 0           | 3.337945                | -1.022375 | 0.666074  |
| 20            | 1             | 0           | 3.016907                | -0.752978 | 1.677021  |
| 21            | 1             | 0           | 4.146818                | -1.758894 | 0.771512  |
| 22            | 6             | 0           | 3.919341                | 0.241739  | -0.029048 |
| 23            | 6             | 0           | 2.866483                | 1.251203  | -0.427526 |
| 24            | 1             | 0           | 4.476989                | -0.061761 | -0.921200 |
| 25            | 1             | 0           | 4.655733                | 0.686446  | 0.651509  |
| 26            | 6             | 0           | 2.165356                | 2.048998  | 0.393695  |
| 27            | 1             | 0           | 2.627027                | 1.293644  | -1.489969 |
| 28            | 6             | 0           | 1.082097                | 2.960770  | -0.127093 |
| 29            | 1             | 0           | 0.112132                | 2.697253  | 0.313867  |
| 30            | 1             | 0           | 1.282743                | 4.004543  | 0.147869  |
| 31            | 1             | 0           | 0.977362                | 2.895018  | -1.212151 |
| 32            | 6             | 0           | 2.493952                | -2.186307 | -1.447091 |
| 33            | 1             | 0           | 2.825987                | -1.382635 | -2.115976 |
| 34            | 1             | 0           | 1.649429                | -2.687055 | -1.922738 |
| 35            | 1             | 0           | 3.322188                | -2.902567 | -1.386592 |
| 36            | 6             | 0           | 2.360380                | 2.089865  | 1.889089  |
| 37            | 1             | 0           | 2.447938                | 3.125510  | 2.240072  |
| 38            | 1             | 0           | 3.243976                | 1.542263  | 2.223396  |
| 39            | 1             | 0           | 1.486971                | 1.661117  | 2.398191  |
| 40            | 6             | 0           | -4.540069               | 1.954850  | -0.304767 |
| 41            | 1             | 0           | -5.237619               | 1.716001  | -1.117003 |
| 42            | 1             | 0           | -4.131966               | 2.949182  | -0.507464 |
| 43            | 1             | 0           | -5.123254               | 2.004998  | 0.619665  |

Frequencies -- 21.6104 25.8604 42.3220  
 Frequencies -- 47.4955 58.8958 66.4848  
 Frequencies -- 98.5054 108.6138 113.4293

Zero-point correction= 0.372786 (Hartree/Particle)  
 Thermal correction to Energy= 0.394090  
 Thermal correction to Enthalpy= 0.395034  
 Thermal correction to Gibbs Free Energy= 0.321523  
 Sum of electronic and zero-point Energies= -812.406645  
 Sum of electronic and thermal Energies= -812.385341  
 Sum of electronic and thermal Enthalpies= -812.384397  
 Sum of electronic and thermal Free Energies= -812.457908

b-ss-1a4a5-.log

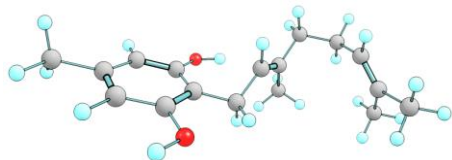

Standard orientation:

| Center Number | Atomic Number | Atomic Type | Coordinates (Angstroms) |           |           |
|---------------|---------------|-------------|-------------------------|-----------|-----------|
|               |               |             | X                       | Y         | Z         |
| 1             | 6             | 0           | -2.488619               | -0.930995 | 0.197269  |
| 2             | 6             | 0           | -3.852432               | -1.095438 | -0.057247 |
| 3             | 6             | 0           | -4.679077               | 0.019341  | -0.223690 |
| 4             | 6             | 0           | -4.116047               | 1.295794  | -0.141325 |
| 5             | 6             | 0           | -2.748411               | 1.451351  | 0.116056  |
| 6             | 6             | 0           | -1.902534               | 0.346385  | 0.299190  |
| 7             | 1             | 0           | -4.249844               | -2.103326 | -0.126621 |
| 8             | 1             | 0           | -4.739215               | 2.177216  | -0.271951 |
| 9             | 8             | 0           | -1.749677               | -2.070648 | 0.368914  |
| 10            | 1             | 0           | -0.810512               | -1.864361 | 0.206962  |
| 11            | 8             | 0           | -2.181957               | 2.696331  | 0.215010  |
| 12            | 1             | 0           | -2.862450               | 3.367424  | 0.068459  |
| 13            | 6             | 0           | -0.432082               | 0.513575  | 0.642109  |
| 14            | 6             | 0           | 0.487726                | -0.251669 | -0.282365 |
| 15            | 1             | 0           | -0.265950               | 0.220383  | 1.685014  |
| 16            | 1             | 0           | -0.181026               | 1.576950  | 0.583759  |
| 17            | 6             | 0           | 1.444495                | -1.139477 | 0.047881  |
| 18            | 1             | 0           | 0.340399                | -0.034890 | -1.340316 |
| 19            | 6             | 0           | 2.298161                | -1.779248 | -1.025862 |
| 20            | 1             | 0           | 2.206358                | -2.872209 | -0.959776 |
| 21            | 1             | 0           | 1.930415                | -1.486478 | -2.016038 |
| 22            | 6             | 0           | 3.800399                | -1.412318 | -0.915030 |
| 23            | 6             | 0           | 4.035043                | 0.066630  | -1.054614 |
| 24            | 1             | 0           | 4.331168                | -1.946114 | -1.715515 |
| 25            | 1             | 0           | 4.202779                | -1.796440 | 0.026375  |
| 26            | 6             | 0           | 4.596829                | 0.911565  | -0.176495 |
| 27            | 1             | 0           | 3.666912                | 0.489902  | -1.991087 |
| 28            | 6             | 0           | 4.717690                | 2.385201  | -0.484995 |
| 29            | 1             | 0           | 4.191819                | 2.985427  | 0.269459  |
| 30            | 1             | 0           | 5.766940                | 2.707982  | -0.459120 |
| 31            | 1             | 0           | 4.306844                | 2.636669  | -1.466901 |
| 32            | 6             | 0           | 1.782347                | -1.535244 | 1.466518  |
| 33            | 1             | 0           | 2.034937                | -2.599870 | 1.519710  |
| 34            | 1             | 0           | 0.967542                | -1.345439 | 2.168228  |
| 35            | 1             | 0           | 2.659214                | -0.981397 | 1.821594  |
| 36            | 6             | 0           | 5.152406                | 0.517473  | 1.170539  |
| 37            | 1             | 0           | 6.208733                | 0.805571  | 1.248804  |
| 38            | 1             | 0           | 5.081939                | -0.552032 | 1.376418  |
| 39            | 1             | 0           | 4.626811                | 1.052201  | 1.972433  |
| 40            | 6             | 0           | -6.153017               | -0.161514 | -0.501949 |
| 41            | 1             | 0           | -6.672386               | 0.798244  | -0.565994 |
| 42            | 1             | 0           | -6.632506               | -0.754520 | 0.284685  |
| 43            | 1             | 0           | -6.313114               | -0.694821 | -1.445908 |

Frequencies -- 15.5967 26.3939 32.2372  
 Frequencies -- 45.1914 54.5629 57.7785  
 Frequencies -- 73.8930 108.5781 127.8166  
 Zero-point correction= 0.372860 (Hartree/Particle)  
 Thermal correction to Energy= 0.394169  
 Thermal correction to Enthalpy= 0.395113  
 Thermal correction to Gibbs Free Energy= 0.320527  
 Sum of electronic and zero-point Energies= -812.403379  
 Sum of electronic and thermal Energies= -812.382070  
 Sum of electronic and thermal Enthalpies= -812.381125  
 Sum of electronic and thermal Free Energies= -812.455712

b-ss-1a4a5a.log

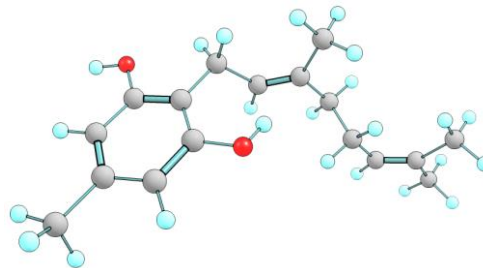

Standard orientation:

| Center Number | Atomic Number | Atomic Type | Coordinates (Angstroms) |           |           |
|---------------|---------------|-------------|-------------------------|-----------|-----------|
|               |               |             | X                       | Y         | Z         |
| 1             | 6             | 0           | -2.081007               | -0.611551 | 0.604169  |
| 2             | 6             | 0           | -2.992445               | -1.670796 | 0.612115  |
| 3             | 6             | 0           | -4.262567               | -1.515326 | 0.050365  |
| 4             | 6             | 0           | -4.600790               | -0.286885 | -0.523566 |
| 5             | 6             | 0           | -3.682267               | 0.769668  | -0.526643 |
| 6             | 6             | 0           | -2.403676               | 0.638715  | 0.038152  |
| 7             | 1             | 0           | -2.688710               | -2.612660 | 1.058455  |
| 8             | 1             | 0           | -5.581882               | -0.143180 | -0.969749 |
| 9             | 8             | 0           | -0.866519               | -0.843389 | 1.191577  |
| 10            | 1             | 0           | -0.235805               | -0.161325 | 0.896605  |
| 11            | 8             | 0           | -4.002610               | 1.985146  | -1.074961 |
| 12            | 1             | 0           | -4.900333               | 1.944932  | -1.432014 |
| 13            | 6             | 0           | -1.424655               | 1.801740  | 0.063945  |
| 14            | 6             | 0           | -0.064480               | 1.427699  | -0.480144 |
| 15            | 1             | 0           | -1.342931               | 2.189103  | 1.086005  |
| 16            | 1             | 0           | -1.840474               | 2.615033  | -0.538311 |
| 17            | 6             | 0           | 1.142316                | 1.587327  | 0.095121  |
| 18            | 1             | 0           | -0.094825               | 0.947603  | -1.458936 |
| 19            | 6             | 0           | 2.383614                | 1.058207  | -0.594067 |
| 20            | 1             | 0           | 2.197147                | 0.934243  | -1.666852 |
| 21            | 1             | 0           | 3.205344                | 1.778639  | -0.493208 |
| 22            | 6             | 0           | 2.849004                | -0.301558 | -0.009303 |
| 23            | 6             | 0           | 4.049001                | -0.846862 | -0.734589 |
| 24            | 1             | 0           | 2.013539                | -1.009555 | -0.098000 |
| 25            | 1             | 0           | 3.047069                | -0.191007 | 1.060823  |
| 26            | 6             | 0           | 5.320312                | -0.898406 | -0.306941 |
| 27            | 1             | 0           | 3.842144                | -1.207207 | -1.743562 |
| 28            | 6             | 0           | 6.414403                | -1.459066 | -1.183909 |
| 29            | 1             | 0           | 7.193502                | -0.706947 | -1.366069 |
| 30            | 1             | 0           | 6.912784                | -2.306608 | -0.694839 |
| 31            | 1             | 0           | 6.034766                | -1.798754 | -2.151719 |
| 32            | 6             | 0           | 1.381127                | 2.245463  | 1.432530  |
| 33            | 1             | 0           | 1.985154                | 1.603402  | 2.083537  |
| 34            | 1             | 0           | 0.462583                | 2.496713  | 1.965342  |
| 35            | 1             | 0           | 1.952458                | 3.171444  | 1.291710  |
| 36            | 6             | 0           | 5.793465                | -0.420765 | 1.044127  |
| 37            | 1             | 0           | 6.258287                | -1.243411 | 1.603002  |
| 38            | 1             | 0           | 4.997428                | 0.000092  | 1.661066  |
| 39            | 1             | 0           | 6.568001                | 0.347940  | 0.925571  |
| 40            | 6             | 0           | -5.244673               | -2.663261 | 0.060152  |
| 41            | 1             | 0           | -6.189904               | -2.389555 | -0.415937 |
| 42            | 1             | 0           | -5.462986               | -2.986132 | 1.084264  |
| 43            | 1             | 0           | -4.839412               | -3.532915 | -0.469203 |

Frequencies -- 19.4496 22.7228 33.2768  
 Frequencies -- 41.1988 46.0850 49.8778  
 Frequencies -- 75.5167 96.2284 110.5373

Zero-point correction= 0.372746 (Hartree/Particle)  
 Thermal correction to Energy= 0.394281  
 Thermal correction to Enthalpy= 0.395225  
 Thermal correction to Gibbs Free Energy= 0.319622  
 Sum of electronic and zero-point Energies= -812.402722  
 Sum of electronic and thermal Energies= -812.381187  
 Sum of electronic and thermal Enthalpies= -812.380243  
 Sum of electronic and thermal Free Energies= -812.455846

**Cannabigerocin-ss-1a3c**  
ss-1a3c4a5a.log

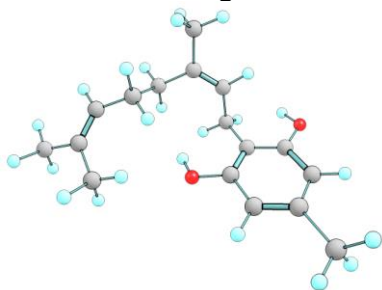

Standard orientation:

| Center Number | Atomic Number | Atomic Type | Coordinates (Angstroms) |           |           |
|---------------|---------------|-------------|-------------------------|-----------|-----------|
|               |               |             | X                       | Y         | Z         |
| 1             | 6             | 0           | 3.130942                | 0.614264  | -0.479766 |
| 2             | 6             | 0           | 4.018793                | -0.312078 | 0.068147  |
| 3             | 6             | 0           | 3.570397                | -1.582676 | 0.444138  |
| 4             | 6             | 0           | 2.225611                | -1.906154 | 0.257647  |
| 5             | 6             | 0           | 1.343656                | -0.970609 | -0.292268 |
| 6             | 6             | 0           | 1.771423                | 0.307588  | -0.687296 |
| 7             | 1             | 0           | 5.056422                | -0.021986 | 0.199961  |
| 8             | 1             | 0           | 1.838257                | -2.880621 | 0.536669  |
| 9             | 8             | 0           | 3.657054                | 1.841069  | -0.791978 |
| 10            | 1             | 0           | 2.994465                | 2.393314  | -1.226816 |
| 11            | 8             | 0           | 0.041178                | -1.383299 | -0.417674 |
| 12            | 1             | 0           | -0.486839               | -0.710834 | -0.866203 |
| 13            | 6             | 0           | 0.806193                | 1.351116  | -1.226439 |
| 14            | 6             | 0           | 0.320311                | 2.275479  | -0.132178 |
| 15            | 1             | 0           | -0.027249               | 0.876455  | -1.753541 |
| 16            | 1             | 0           | 1.299899                | 1.937183  | -2.015931 |
| 17            | 6             | 0           | -0.928805               | 2.438346  | 0.329359  |
| 18            | 1             | 0           | 1.116798                | 2.845424  | 0.346664  |
| 19            | 6             | 0           | -2.142814               | 1.704074  | -0.198340 |
| 20            | 1             | 0           | -2.956501               | 2.426667  | -0.349027 |
| 21            | 1             | 0           | -1.953324               | 1.263966  | -1.182790 |
| 22            | 6             | 0           | -2.649168               | 0.589443  | 0.754526  |
| 23            | 6             | 0           | -3.911929               | -0.047115 | 0.241114  |
| 24            | 1             | 0           | -2.846383               | 1.033014  | 1.739751  |
| 25            | 1             | 0           | -1.850825               | -0.143014 | 0.903136  |
| 26            | 6             | 0           | -4.143315               | -1.334976 | -0.058003 |
| 27            | 1             | 0           | -4.732082               | 0.657095  | 0.087861  |
| 28            | 6             | 0           | -5.491076               | -1.777524 | -0.578004 |
| 29            | 1             | 0           | -5.392619               | -2.252320 | -1.563276 |
| 30            | 1             | 0           | -5.937693               | -2.531545 | 0.083674  |
| 31            | 1             | 0           | -6.193803               | -0.944415 | -0.669231 |
| 32            | 6             | 0           | -1.203913               | 3.398712  | 1.463536  |
| 33            | 1             | 0           | -1.927970               | 4.163906  | 1.155796  |
| 34            | 1             | 0           | -0.294927               | 3.902944  | 1.802560  |
| 35            | 1             | 0           | -1.644205               | 2.883978  | 2.326035  |
| 36            | 6             | 0           | -3.142366               | -2.454942 | 0.088129  |
| 37            | 1             | 0           | -3.519896               | -3.212405 | 0.787672  |
| 38            | 1             | 0           | -2.161975               | -2.130173 | 0.436912  |
| 39            | 1             | 0           | -3.002470               | -2.967990 | -0.872495 |
| 40            | 6             | 0           | 4.535114                | -2.581948 | 1.037785  |
| 41            | 1             | 0           | 4.035149                | -3.518828 | 1.296502  |
| 42            | 1             | 0           | 5.003605                | -2.185370 | 1.945391  |
| 43            | 1             | 0           | 5.343981                | -2.812603 | 0.335426  |

Frequencies -- 18.5990 21.2656 23.8615  
 Frequencies -- 44.6567 51.4150 59.5102  
 Frequencies -- 92.4358 107.9664 125.3618

Zero-point correction= 0.372705 (Hartree/Particle)  
 Thermal correction to Energy= 0.394183  
 Thermal correction to Enthalpy= 0.395128  
 Thermal correction to Gibbs Free Energy= 0.320109  
 Sum of electronic and zero-point Energies= -812.399942  
 Sum of electronic and thermal Energies= -812.378463  
 Sum of electronic and thermal Enthalpies= -812.377519  
 Sum of electronic and thermal Free Energies= -812.452537

**ss-1a3c4+5+.log**

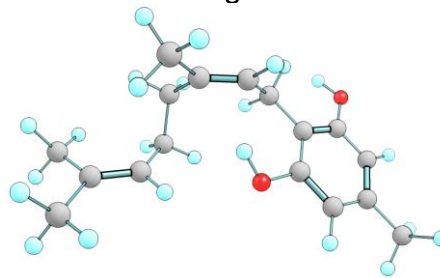

Standard orientation:

| Center Number | Atomic Number | Atomic Type | Coordinates (Angstroms) |           |           |
|---------------|---------------|-------------|-------------------------|-----------|-----------|
|               |               |             | X                       | Y         | Z         |
| 1             | 6             | 0           | -1.657274               | 0.701649  | 0.242260  |
| 2             | 6             | 0           | -2.652211               | 1.682082  | 0.280513  |
| 3             | 6             | 0           | -3.982795               | 1.356571  | 0.006810  |
| 4             | 6             | 0           | -4.298283               | 0.034256  | -0.310823 |
| 5             | 6             | 0           | -3.299044               | -0.942873 | -0.351638 |
| 6             | 6             | 0           | -1.952711               | -0.644807 | -0.061826 |
| 7             | 1             | 0           | -2.362277               | 2.698823  | 0.526272  |
| 8             | 1             | 0           | -5.316599               | -0.259340 | -0.545043 |
| 9             | 8             | 0           | -0.381327               | 1.130234  | 0.495791  |
| 10            | 1             | 0           | 0.181250                | 0.358908  | 0.700962  |
| 11            | 8             | 0           | -3.722305               | -2.201393 | -0.694520 |
| 12            | 1             | 0           | -2.965674               | -2.782771 | -0.843195 |
| 13            | 6             | 0           | -0.871981               | -1.716429 | -0.142756 |
| 14            | 6             | 0           | 0.181064                | -1.639293 | 0.941027  |
| 15            | 1             | 0           | -0.408017               | -1.700417 | -1.134991 |
| 16            | 1             | 0           | -1.338593               | -2.706849 | -0.044069 |
| 17            | 6             | 0           | 1.515596                | -1.594451 | 0.766705  |
| 18            | 1             | 0           | -0.210323               | -1.647480 | 1.958279  |
| 19            | 6             | 0           | 2.182897                | -1.579060 | -0.598422 |
| 20            | 1             | 0           | 3.215341                | -1.927714 | -0.488241 |
| 21            | 1             | 0           | 1.686047                | -2.281856 | -1.276284 |
| 22            | 6             | 0           | 2.210054                | -0.179239 | -1.272981 |
| 23            | 6             | 0           | 2.877118                | 0.892779  | -0.443492 |
| 24            | 1             | 0           | 1.180319                | 0.130041  | -1.480862 |
| 25            | 1             | 0           | 2.704663                | -0.286878 | -2.244839 |
| 26            | 6             | 0           | 4.193893                | 1.138865  | -0.359301 |
| 27            | 1             | 0           | 2.208946                | 1.505355  | 0.160587  |
| 28            | 6             | 0           | 4.732282                | 2.231742  | 0.531159  |
| 29            | 1             | 0           | 5.426885                | 1.821849  | 1.276260  |
| 30            | 1             | 0           | 5.302747                | 2.966869  | -0.051719 |
| 31            | 1             | 0           | 3.935231                | 2.759959  | 1.062068  |
| 32            | 6             | 0           | 2.450752                | -1.532109 | 1.947942  |
| 33            | 1             | 0           | 3.101405                | -2.415584 | 1.966038  |
| 34            | 1             | 0           | 1.915838                | -1.477053 | 2.899987  |
| 35            | 1             | 0           | 3.109214                | -0.660119 | 1.860161  |
| 36            | 6             | 0           | 5.246995                | 0.365672  | -1.113877 |
| 37            | 1             | 0           | 5.878226                | 1.043886  | -1.702196 |
| 38            | 1             | 0           | 4.830873                | -0.384484 | -1.789151 |
| 39            | 1             | 0           | 5.916427                | -0.149359 | -0.412579 |
| 40            | 6             | 0           | -5.063076               | 2.409480  | 0.082369  |
| 41            | 1             | 0           | -5.898306               | 2.174574  | -0.583838 |
| 42            | 1             | 0           | -4.676954               | 3.397469  | -0.185310 |
| 43            | 1             | 0           | -5.467279               | 2.482431  | 1.099514  |

Frequencies -- 19.5303 31.7631 39.7424  
 Frequencies -- 45.9296 49.6701 80.9073  
 Frequencies -- 94.7604 107.4599 136.0212

Zero-point correction= 0.373056 (Hartree/Particle)  
 Thermal correction to Energy= 0.394236  
 Thermal correction to Enthalpy= 0.395180  
 Thermal correction to Gibbs Free Energy= 0.321784  
 Sum of electronic and zero-point Energies= -812.401385  
 Sum of electronic and thermal Energies= -812.380205  
 Sum of electronic and thermal Enthalpies= -812.379261  
 Sum of electronic and thermal Free Energies= -812.452656

ss-1a3c4+5-.log

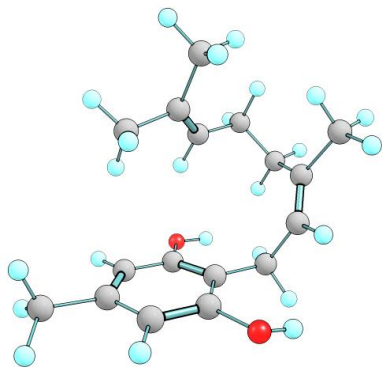

Standard orientation:

| Center Number | Atomic Number | Atomic Type | Coordinates (Angstroms) |           |           |
|---------------|---------------|-------------|-------------------------|-----------|-----------|
|               |               |             | X                       | Y         | Z         |
| 1             | 6             | 0           | 1.902458                | -1.331203 | -0.770285 |
| 2             | 6             | 0           | 2.932471                | -0.419254 | -1.004928 |
| 3             | 6             | 0           | 3.213495                | 0.581329  | -0.070207 |
| 4             | 6             | 0           | 2.460422                | 0.634659  | 1.103753  |
| 5             | 6             | 0           | 1.423339                | -0.276844 | 1.325029  |
| 6             | 6             | 0           | 1.102874                | -1.274927 | 0.388043  |
| 7             | 1             | 0           | 3.509763                | -0.512153 | -1.919239 |
| 8             | 1             | 0           | 2.658842                | 1.384197  | 1.863171  |
| 9             | 8             | 0           | 1.703258                | -2.278580 | -1.743459 |
| 10            | 1             | 0           | 1.144046                | -2.991303 | -1.408623 |
| 11            | 8             | 0           | 0.747127                | -0.117181 | 2.508335  |
| 12            | 1             | 0           | 0.059205                | -0.788821 | 2.595578  |
| 13            | 6             | 0           | -0.066100               | -2.235713 | 0.565466  |
| 14            | 6             | 0           | -1.195960               | -1.985797 | -0.414554 |
| 15            | 1             | 0           | -0.438653               | -2.214606 | 1.593376  |
| 16            | 1             | 0           | 0.289137                | -3.270357 | 0.444622  |
| 17            | 6             | 0           | -2.372920               | -1.379691 | -0.198858 |
| 18            | 1             | 0           | -0.997669               | -2.330981 | -1.428413 |
| 19            | 6             | 0           | -2.815598               | -0.788312 | 1.120551  |
| 20            | 1             | 0           | -3.771859               | -1.241907 | 1.415288  |
| 21            | 1             | 0           | -2.105853               | -1.026180 | 1.918469  |
| 22            | 6             | 0           | -3.003514               | 0.753771  | 1.072591  |
| 23            | 6             | 0           | -1.728539               | 1.465417  | 0.711085  |
| 24            | 1             | 0           | -3.336965               | 1.074319  | 2.069085  |
| 25            | 1             | 0           | -3.816116               | 1.000592  | 0.384097  |
| 26            | 6             | 0           | -1.465919               | 2.211981  | -0.372687 |
| 27            | 1             | 0           | -0.913180               | 1.297882  | 1.413484  |
| 28            | 6             | 0           | -0.087669               | 2.787124  | -0.599836 |
| 29            | 1             | 0           | 0.327417                | 2.429052  | -1.551803 |
| 30            | 1             | 0           | -0.121495               | 3.882643  | -0.669431 |
| 31            | 1             | 0           | 0.611204                | 2.507100  | 0.192141  |
| 32            | 6             | 0           | -3.362879               | -1.230800 | -1.331064 |
| 33            | 1             | 0           | -4.349047               | -1.615151 | -1.040991 |
| 34            | 1             | 0           | -3.037678               | -1.763491 | -2.228697 |
| 35            | 1             | 0           | -3.503424               | -0.178177 | -1.600427 |
| 36            | 6             | 0           | -2.460005               | 2.545186  | -1.458233 |
| 37            | 1             | 0           | -2.509839               | 3.630871  | -1.611985 |
| 38            | 1             | 0           | -3.471028               | 2.192123  | -1.247053 |
| 39            | 1             | 0           | -2.142873               | 2.111620  | -2.415818 |
| 40            | 6             | 0           | 4.291915                | 1.603040  | -0.339416 |
| 41            | 1             | 0           | 4.718083                | 1.990420  | 0.590449  |
| 42            | 1             | 0           | 3.885195                | 2.457566  | -0.894137 |
| 43            | 1             | 0           | 5.102482                | 1.181041  | -0.940842 |

Frequencies -- 22.7181 25.6540 39.9637  
 Frequencies -- 60.2922 68.2720 78.0593  
 Frequencies -- 106.7526 134.6666 140.0919

Zero-point correction= 0.373264 (Hartree/Particle)  
 Thermal correction to Energy= 0.394368  
 Thermal correction to Enthalpy= 0.395312  
 Thermal correction to Gibbs Free Energy= 0.322999  
 Sum of electronic and zero-point Energies= -812.400970  
 Sum of electronic and thermal Energies= -812.379866  
 Sum of electronic and thermal Enthalpies= -812.378922  
 Sum of electronic and thermal Free Energies= -812.451234

ss-1a3c4+5a.log

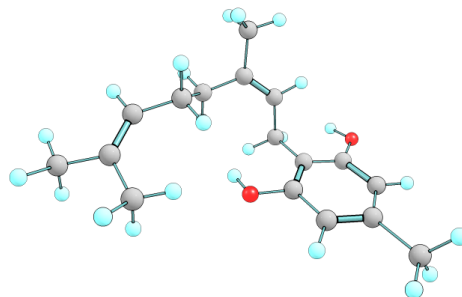

Standard orientation:

| Center Number | Atomic Number | Atomic Type | Coordinates (Angstroms) |           |           |
|---------------|---------------|-------------|-------------------------|-----------|-----------|
|               |               |             | X                       | Y         | Z         |
| 1             | 6             | 0           | 3.130627                | 0.614305  | -0.479151 |
| 2             | 6             | 0           | 4.018363                | -0.311964 | 0.069064  |
| 3             | 6             | 0           | 3.570032                | -1.582772 | 0.444424  |
| 4             | 6             | 0           | 2.225421                | -1.906479 | 0.257070  |
| 5             | 6             | 0           | 1.343572                | -0.970985 | -0.293109 |
| 6             | 6             | 0           | 1.771281                | 0.307423  | -0.687498 |
| 7             | 1             | 0           | 5.055842                | -0.021661 | 0.201578  |
| 8             | 1             | 0           | 1.838105                | -2.881091 | 0.535639  |
| 9             | 8             | 0           | 3.656613                | 1.841350  | -0.790674 |
| 10            | 1             | 0           | 2.994426                | 2.393213  | -1.226611 |
| 11            | 8             | 0           | 0.041264                | -1.383957 | -0.419367 |
| 12            | 1             | 0           | -0.486794               | -0.711251 | -0.867485 |
| 13            | 6             | 0           | 0.806213                | 1.351045  | -1.226749 |
| 14            | 6             | 0           | 0.320529                | 2.275635  | -0.132583 |
| 15            | 1             | 0           | -0.027358               | 0.876497  | -1.753732 |
| 16            | 1             | 0           | 1.299994                | 1.936910  | -2.016349 |
| 17            | 6             | 0           | -0.928540               | 2.438635  | 0.329019  |
| 18            | 1             | 0           | 1.117085                | 2.845626  | 0.346082  |
| 19            | 6             | 0           | -2.142619               | 1.704261  | -0.198398 |
| 20            | 1             | 0           | -2.956538               | 2.426716  | -0.348473 |
| 21            | 1             | 0           | -1.953467               | 1.264506  | -1.183071 |
| 22            | 6             | 0           | -2.648273               | 0.589216  | 0.754357  |
| 23            | 6             | 0           | -3.911461               | -0.047093 | 0.241666  |
| 24            | 1             | 0           | -2.844708               | 1.032357  | 1.739934  |
| 25            | 1             | 0           | -1.849846               | -0.143336 | 0.902046  |
| 26            | 6             | 0           | -4.143227               | -1.334878 | -0.057480 |
| 27            | 1             | 0           | -4.731629               | 0.657247  | 0.089083  |
| 28            | 6             | 0           | -5.491391               | -1.777171 | -0.576645 |
| 29            | 1             | 0           | -5.393668               | -2.251790 | -1.562075 |
| 30            | 1             | 0           | -5.937635               | -2.531266 | 0.085199  |
| 31            | 1             | 0           | -6.194087               | -0.943966 | -0.667231 |
| 32            | 6             | 0           | -1.203575               | 3.399323  | 1.462938  |
| 33            | 1             | 0           | -1.927151               | 4.164815  | 1.154803  |
| 34            | 1             | 0           | -0.294472               | 3.903177  | 1.802209  |
| 35            | 1             | 0           | -1.644447               | 2.884936  | 2.325346  |
| 36            | 6             | 0           | -3.142328               | -2.454997 | 0.087832  |
| 37            | 1             | 0           | -3.519404               | -3.212414 | 0.787668  |
| 38            | 1             | 0           | -2.161617               | -2.130365 | 0.435839  |
| 39            | 1             | 0           | -3.003272               | -2.968052 | -0.872911 |
| 40            | 6             | 0           | 4.534718                | -2.582195 | 1.037870  |
| 41            | 1             | 0           | 4.033885                | -3.517558 | 1.300377  |
| 42            | 1             | 0           | 5.006615                | -2.184124 | 1.943031  |
| 43            | 1             | 0           | 5.341079                | -2.816115 | 0.333685  |

Frequencies -- 17.2565 20.1733 23.7553  
 Frequencies -- 44.5896 51.2951 59.5143  
 Frequencies -- 92.3745 107.9936 125.3457

Zero-point correction= 0.372697 (Hartree/Particle)  
 Thermal correction to Energy= 0.394182  
 Thermal correction to Enthalpy= 0.395126  
 Thermal correction to Gibbs Free Energy= 0.319977  
 Sum of electronic and zero-point Energies= -812.399950  
 Sum of electronic and thermal Energies= -812.378465  
 Sum of electronic and thermal Enthalpies= -812.377521  
 Sum of electronic and thermal Free Energies= -812.452670

ss-1a3c4-5+.log

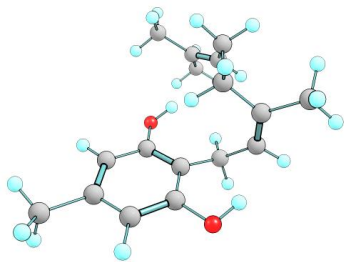

Standard orientation:

| Center Number | Atomic Number | Atomic Type | Coordinates (Angstroms) |           |           |
|---------------|---------------|-------------|-------------------------|-----------|-----------|
|               |               |             | X                       | Y         | Z         |
| 1             | 6             | 0           | -2.261796               | 0.959960  | 0.395631  |
| 2             | 6             | 0           | -3.359950               | 0.332003  | -0.194512 |
| 3             | 6             | 0           | -3.344005               | -1.047580 | -0.425196 |
| 4             | 6             | 0           | -2.196865               | -1.772788 | -0.091163 |
| 5             | 6             | 0           | -1.099983               | -1.136941 | 0.497609  |
| 6             | 6             | 0           | -1.119420               | 0.237980  | 0.790651  |
| 7             | 1             | 0           | -4.215395               | 0.938032  | -0.476214 |
| 8             | 1             | 0           | -2.127616               | -2.836607 | -0.295034 |
| 9             | 8             | 0           | -2.350312               | 2.311932  | 0.604387  |
| 10            | 1             | 0           | -1.449440               | 2.677288  | 0.650165  |
| 11            | 8             | 0           | -0.014875               | -1.926600 | 0.797310  |
| 12            | 1             | 0           | 0.806494                | -1.422915 | 0.656120  |
| 13            | 6             | 0           | -0.020838               | 0.927418  | 1.582422  |
| 14            | 6             | 0           | 0.626476                | 2.158577  | 0.962662  |
| 15            | 1             | 0           | 0.753099                | 0.201241  | 1.851209  |
| 16            | 1             | 0           | -0.457633               | 1.240086  | 2.539360  |
| 17            | 6             | 0           | 1.110385                | 2.313631  | -0.283792 |
| 18            | 1             | 0           | 0.746180                | 2.996794  | 1.649100  |
| 19            | 6             | 0           | 1.116147                | 1.228323  | -1.340328 |
| 20            | 1             | 0           | 0.319947                | 0.503876  | -1.160744 |
| 21            | 1             | 0           | 0.920758                | 1.682852  | -2.319677 |
| 22            | 6             | 0           | 2.467740                | 0.466960  | -1.425358 |
| 23            | 6             | 0           | 2.819146                | -0.268589 | -0.160184 |
| 24            | 1             | 0           | 3.267522                | 1.187122  | -1.645080 |
| 25            | 1             | 0           | 2.421326                | -0.211589 | -2.281193 |
| 26            | 6             | 0           | 2.943120                | -1.596794 | 0.025867  |
| 27            | 1             | 0           | 2.999050                | 0.376392  | 0.699862  |
| 28            | 6             | 0           | 3.320416                | -2.158376 | 1.378256  |
| 29            | 1             | 0           | 2.546619                | -2.845890 | 1.743181  |
| 30            | 1             | 0           | 4.247919                | -2.740493 | 1.310162  |
| 31            | 1             | 0           | 3.461244                | -1.372864 | 2.125813  |
| 32            | 6             | 0           | 1.751363                | 3.614402  | -0.702812 |
| 33            | 1             | 0           | 2.778647                | 3.449444  | -1.050346 |
| 34            | 1             | 0           | 1.780719                | 4.343400  | 0.111244  |
| 35            | 1             | 0           | 1.206873                | 4.058237  | -1.545764 |
| 36            | 6             | 0           | 2.715360                | -2.643612 | -1.037481 |
| 37            | 1             | 0           | 3.601397                | -3.281298 | -1.142290 |
| 38            | 1             | 0           | 2.479174                | -2.224575 | -2.016760 |
| 39            | 1             | 0           | 1.885559                | -3.296832 | -0.741771 |
| 40            | 6             | 0           | -4.544215               | -1.738445 | -1.028347 |
| 41            | 1             | 0           | -4.254969               | -2.643829 | -1.569708 |
| 42            | 1             | 0           | -5.078586               | -1.080440 | -1.720147 |
| 43            | 1             | 0           | -5.255880               | -2.036859 | -0.248614 |

Frequencies -- 30.1611 49.7639 64.0313  
 Frequencies -- 68.5052 74.7182 82.1850  
 Frequencies -- 95.8108 121.3220 148.0192

Zero-point correction= 0.373684 (Hartree/Particle)  
 Thermal correction to Energy= 0.394448  
 Thermal correction to Enthalpy= 0.395392  
 Thermal correction to Gibbs Free Energy= 0.324741  
 Sum of electronic and zero-point Energies= -812.405137  
 Sum of electronic and thermal Energies= -812.384374  
 Sum of electronic and thermal Enthalpies= -812.383429  
 Sum of electronic and thermal Free Energies= -812.454080

ss-1a3c4-5-.log

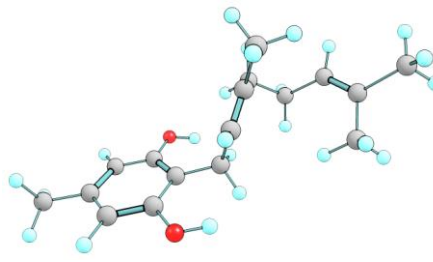

Standard orientation:

| Center Number | Atomic Number | Atomic Type | Coordinates (Angstroms) |           |           |
|---------------|---------------|-------------|-------------------------|-----------|-----------|
|               |               |             | X                       | Y         | Z         |
| 1             | 6             | 0           | 2.559299                | 1.336702  | -0.217393 |
| 2             | 6             | 0           | 3.914008                | 1.228556  | 0.103719  |
| 3             | 6             | 0           | 4.529590                | -0.025424 | 0.145523  |
| 4             | 6             | 0           | 3.772513                | -1.159806 | -0.158145 |
| 5             | 6             | 0           | 2.417901                | -1.041749 | -0.480202 |
| 6             | 6             | 0           | 1.774071                | 0.208075  | -0.517741 |
| 7             | 1             | 0           | 4.470175                | 2.134606  | 0.322164  |
| 8             | 1             | 0           | 4.218607                | -2.149115 | -0.152659 |
| 9             | 8             | 0           | 2.034968                | 2.604071  | -0.203805 |
| 10            | 1             | 0           | 1.136217                | 2.600254  | -0.558024 |
| 11            | 8             | 0           | 1.760965                | -2.218592 | -0.743411 |
| 12            | 1             | 0           | 0.918050                | -2.038805 | -1.179228 |
| 13            | 6             | 0           | 0.280484                | 0.345177  | -0.765823 |
| 14            | 6             | 0           | -0.485626               | 0.523385  | 0.527461  |
| 15            | 1             | 0           | -0.105027               | -0.505553 | -1.333995 |
| 16            | 1             | 0           | 0.086727                | 1.200184  | -1.431240 |
| 17            | 6             | 0           | -1.364823               | -0.327899 | 1.074518  |
| 18            | 1             | 0           | -0.251107               | 1.440381  | 1.067380  |
| 19            | 6             | 0           | -1.765973               | -1.645082 | 0.433143  |
| 20            | 1             | 0           | -0.883504               | -2.163489 | 0.041314  |
| 21            | 1             | 0           | -2.182260               | -2.306403 | 1.202082  |
| 22            | 6             | 0           | -2.807855               | -1.488272 | -0.705766 |
| 23            | 6             | 0           | -4.118953               | -0.920876 | -0.231251 |
| 24            | 1             | 0           | -2.982259               | -2.479982 | -1.143895 |
| 25            | 1             | 0           | -2.377584               | -0.869699 | -1.498516 |
| 26            | 6             | 0           | -4.582693               | 0.328505  | -0.392110 |
| 27            | 1             | 0           | -4.735509               | -1.616989 | 0.339619  |
| 28            | 6             | 0           | -5.920271               | 0.740818  | 0.174632  |
| 29            | 1             | 0           | -5.804694               | 1.573599  | 0.880913  |
| 30            | 1             | 0           | -6.588920               | 1.100115  | -0.618917 |
| 31            | 1             | 0           | -6.419268               | -0.081317 | 0.695587  |
| 32            | 6             | 0           | -2.042613               | -0.007337 | 2.383265  |
| 33            | 1             | 0           | -3.131264               | -0.006326 | 2.253380  |
| 34            | 1             | 0           | -1.739479               | 0.966238  | 2.779400  |
| 35            | 1             | 0           | -1.814930               | -0.772200 | 3.137180  |
| 36            | 6             | 0           | -3.851244               | 1.431085  | -1.117835 |
| 37            | 1             | 0           | -4.458981               | 1.818471  | -1.945971 |
| 38            | 1             | 0           | -2.883717               | 1.121675  | -1.515137 |
| 39            | 1             | 0           | -3.675713               | 2.275735  | -0.439427 |
| 40            | 6             | 0           | 5.983491                | -0.153292 | 0.534355  |
| 41            | 1             | 0           | 6.089585                | -0.243419 | 1.622419  |
| 42            | 1             | 0           | 6.558877                | 0.723698  | 0.223563  |
| 43            | 1             | 0           | 6.440665                | -1.040881 | 0.087641  |

Frequencies -- 17.5526 31.2567 37.4451  
 Frequencies -- 44.2492 54.6914 57.1697  
 Frequencies -- 83.5901 115.1336 134.1279

Zero-point correction= 0.372961 (Hartree/Particle)  
 Thermal correction to Energy= 0.394257  
 Thermal correction to Enthalpy= 0.395202  
 Thermal correction to Gibbs Free Energy= 0.321342  
 Sum of electronic and zero-point Energies= -812.397790  
 Sum of electronic and thermal Energies= -812.376494  
 Sum of electronic and thermal Enthalpies= -812.375550  
 Sum of electronic and thermal Free Energies= -812.449409

ss-1a3c4-5a.log

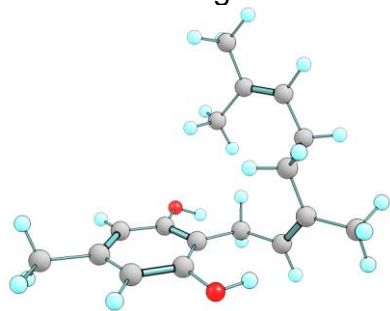

Standard orientation:

| Center Number | Atomic Number | Atomic Type | Coordinates (Angstroms) |           |           |
|---------------|---------------|-------------|-------------------------|-----------|-----------|
|               |               |             | X                       | Y         | Z         |
| 1             | 6             | 0           | -2.020197               | 1.116235  | -0.379658 |
| 2             | 6             | 0           | -3.135469               | 0.520469  | -0.989568 |
| 3             | 6             | 0           | -3.613791               | -0.717739 | -0.579038 |
| 4             | 6             | 0           | -2.958955               | -1.370246 | 0.466375  |
| 5             | 6             | 0           | -1.851207               | -0.773981 | 1.066045  |
| 6             | 6             | 0           | -1.328432               | 0.470954  | 0.656632  |
| 7             | 1             | 0           | -3.617610               | 1.068779  | -1.792672 |
| 8             | 1             | 0           | -3.304552               | -2.327374 | 0.844157  |
| 9             | 8             | 0           | -1.699865               | 2.347413  | -0.869478 |
| 10            | 1             | 0           | -0.855447               | 2.642851  | -0.476531 |
| 11            | 8             | 0           | -1.250085               | -1.476117 | 2.085841  |
| 12            | 1             | 0           | -0.747895               | -0.861646 | 2.629292  |
| 13            | 6             | 0           | -0.065859               | 0.931149  | 1.393699  |
| 14            | 6             | 0           | 0.594456                | 2.229580  | 0.969545  |
| 15            | 1             | 0           | 0.662666                | 0.119150  | 1.210991  |
| 16            | 1             | 0           | -0.244236               | 0.952332  | 2.476946  |
| 17            | 6             | 0           | 1.559476                | 2.274142  | 0.030261  |
| 18            | 1             | 0           | 0.304574                | 3.145627  | 1.480305  |
| 19            | 6             | 0           | 2.008948                | 1.011159  | -0.663826 |
| 20            | 1             | 0           | 1.202246                | 0.269475  | -0.699134 |
| 21            | 1             | 0           | 2.282165                | 1.216241  | -1.703693 |
| 22            | 6             | 0           | 3.238182                | 0.384627  | 0.058153  |
| 23            | 6             | 0           | 3.620969                | -0.946563 | -0.534008 |
| 24            | 1             | 0           | 2.999049                | 0.295226  | 1.123402  |
| 25            | 1             | 0           | 4.076216                | 1.086993  | -0.010006 |
| 26            | 6             | 0           | 2.956890                | -2.100945 | -0.366956 |
| 27            | 1             | 0           | 4.471931                | -0.940825 | -1.214455 |
| 28            | 6             | 0           | 3.404482                | -3.369104 | -1.049393 |
| 29            | 1             | 0           | 3.664154                | -4.144422 | -0.314909 |
| 30            | 1             | 0           | 2.595582                | -3.787108 | -1.661946 |
| 31            | 1             | 0           | 4.272655                | -3.207561 | -1.694148 |
| 32            | 6             | 0           | 2.252279                | 3.548895  | -0.353511 |
| 33            | 1             | 0           | 3.338765                | 3.446026  | -0.235464 |
| 34            | 1             | 0           | 1.919756                | 4.397579  | 0.249949  |
| 35            | 1             | 0           | 2.073034                | 3.783051  | -1.409838 |
| 36            | 6             | 0           | 1.723797                | -2.255584 | 0.487514  |
| 37            | 1             | 0           | 0.814846                | -2.317469 | -0.123992 |
| 38            | 1             | 0           | 1.564041                | -1.425070 | 1.179681  |
| 39            | 1             | 0           | 1.771666                | -3.176457 | 1.081301  |
| 40            | 6             | 0           | -4.783210               | -1.373672 | -1.267953 |
| 41            | 1             | 0           | -5.597583               | -1.564643 | -0.562946 |
| 42            | 1             | 0           | -4.494788               | -2.350824 | -1.683022 |
| 43            | 1             | 0           | -5.165780               | -0.766565 | -2.090066 |

Frequencies -- 22.6446      28.1930      44.2415  
 Frequencies -- 47.8939      57.8674      80.2251  
 Frequencies -- 83.8436      105.4740      122.1346

Zero-point correction= 0.372801 (Hartree/Particle)  
 Thermal correction to Energy= 0.394079  
 Thermal correction to Enthalpy= 0.395023  
 Thermal correction to Gibbs Free Energy= 0.321682  
 Sum of electronic and zero-point Energies= -812.401052  
 Sum of electronic and thermal Energies= -812.379774  
 Sum of electronic and thermal Enthalpies= -812.378830  
 Sum of electronic and thermal Free Energies= -812.452171

ss-1a3c4a5+.log

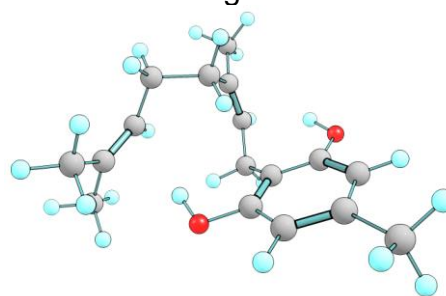

Standard orientation:

| Center Number | Atomic Number | Atomic Type | Coordinates (Angstroms) |           |           |
|---------------|---------------|-------------|-------------------------|-----------|-----------|
|               |               |             | X                       | Y         | Z         |
| 1             | 6             | 0           | -2.262304               | 0.959438  | 0.395876  |
| 2             | 6             | 0           | -3.360451               | 0.331343  | -0.194178 |
| 3             | 6             | 0           | -3.344217               | -1.048161 | -0.425177 |
| 4             | 6             | 0           | -2.196807               | -1.773173 | -0.091567 |
| 5             | 6             | 0           | -1.099972               | -1.137217 | 0.497135  |
| 6             | 6             | 0           | -1.119714               | 0.237665  | 0.790525  |
| 7             | 1             | 0           | -4.216044               | 0.937279  | -0.475637 |
| 8             | 1             | 0           | -2.127341               | -2.836913 | -0.295778 |
| 9             | 8             | 0           | -2.351097               | 2.311357  | 0.604962  |
| 10            | 1             | 0           | -1.450302               | 2.676901  | 0.650737  |
| 11            | 8             | 0           | -0.014606               | -1.926675 | 0.796376  |
| 12            | 1             | 0           | 0.806606                | -1.422665 | 0.655469  |
| 13            | 6             | 0           | -0.021149               | 0.927218  | 1.582236  |
| 14            | 6             | 0           | 0.625894                | 2.158509  | 0.962457  |
| 15            | 1             | 0           | 0.752906                | 0.201153  | 1.850952  |
| 16            | 1             | 0           | -0.457910               | 1.239791  | 2.539212  |
| 17            | 6             | 0           | 1.109663                | 2.313672  | -0.284029 |
| 18            | 1             | 0           | 0.745345                | 2.996790  | 1.648852  |
| 19            | 6             | 0           | 1.115772                | 1.228274  | -1.340480 |
| 20            | 1             | 0           | 0.319785                | 0.503607  | -1.160850 |
| 21            | 1             | 0           | 0.920276                | 1.682660  | -2.319872 |
| 22            | 6             | 0           | 2.467592                | 0.467279  | -1.425422 |
| 23            | 6             | 0           | 2.819258                | -0.267856 | -0.160070 |
| 24            | 1             | 0           | 3.267170                | 1.187597  | -1.645378 |
| 25            | 1             | 0           | 2.421296                | -0.211486 | -2.281087 |
| 26            | 6             | 0           | 2.944295                | -1.595925 | 0.026238  |
| 27            | 1             | 0           | 2.998267                | 0.377391  | 0.699960  |
| 28            | 6             | 0           | 3.321402                | -2.156933 | 1.378910  |
| 29            | 1             | 0           | 2.548208                | -2.845356 | 1.743383  |
| 30            | 1             | 0           | 4.249674                | -2.737906 | 1.311488  |
| 31            | 1             | 0           | 3.460767                | -1.371175 | 2.126483  |
| 32            | 6             | 0           | 1.750315                | 3.614585  | -0.703113 |
| 33            | 1             | 0           | 2.777683                | 3.449853  | -1.050514 |
| 34            | 1             | 0           | 1.779391                | 4.343685  | 0.110863  |
| 35            | 1             | 0           | 1.205808                | 4.058181  | -1.546176 |
| 36            | 6             | 0           | 2.717940                | -2.643143 | -1.037025 |
| 37            | 1             | 0           | 3.604616                | -3.280036 | -1.141268 |
| 38            | 1             | 0           | 2.481882                | -2.224515 | -2.016506 |
| 39            | 1             | 0           | 1.888608                | -3.297092 | -0.741619 |
| 40            | 6             | 0           | -4.544372               | -1.739199 | -1.028234 |
| 41            | 1             | 0           | -4.255147               | -2.644841 | -1.569165 |
| 42            | 1             | 0           | -5.078643               | -1.081420 | -1.720328 |
| 43            | 1             | 0           | -5.256146               | -2.037175 | -0.248431 |

Frequencies -- 30.1800      49.7598      64.0544  
 Frequencies -- 68.5236      74.6874      82.1251  
 Frequencies -- 95.7216      121.2861      147.9515

Zero-point correction= 0.373683 (Hartree/Particle)  
 Thermal correction to Energy= 0.394447  
 Thermal correction to Enthalpy= 0.395392  
 Thermal correction to Gibbs Free Energy= 0.324738  
 Sum of electronic and zero-point Energies= -812.405139  
 Sum of electronic and thermal Energies= -812.384374  
 Sum of electronic and thermal Enthalpies= -812.383430  
 Sum of electronic and thermal Free Energies= -812.454083



ss-1a3c4a5-.log

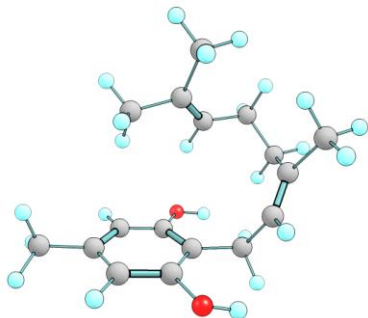

Standard orientation:

| Center Number | Atomic Number | Atomic Type | Coordinates (Angstroms) |           |           |
|---------------|---------------|-------------|-------------------------|-----------|-----------|
|               |               |             | X                       | Y         | Z         |
| 1             | 6             | 0           | 1.902549                | -1.331354 | -0.770020 |
| 2             | 6             | 0           | 2.932663                | -0.419584 | -1.004841 |
| 3             | 6             | 0           | 3.213767                | 0.581206  | -0.070342 |
| 4             | 6             | 0           | 2.460640                | 0.634920  | 1.103546  |
| 5             | 6             | 0           | 1.423441                | -0.276424 | 1.325006  |
| 6             | 6             | 0           | 1.102918                | -1.274707 | 0.388276  |
| 7             | 1             | 0           | 3.510012                | -0.512803 | -1.919083 |
| 8             | 1             | 0           | 2.659090                | 1.384621  | 1.862797  |
| 9             | 8             | 0           | 1.703270                | -2.278961 | -1.742959 |
| 10            | 1             | 0           | 1.144220                | -2.991683 | -1.407850 |
| 11            | 8             | 0           | 0.747242                | -0.116422 | 2.508269  |
| 12            | 1             | 0           | 0.058692                | -0.787452 | 2.595261  |
| 13            | 6             | 0           | -0.066150               | -2.235322 | 0.565943  |
| 14            | 6             | 0           | -1.195894               | -1.985677 | -0.414258 |
| 15            | 1             | 0           | -0.438767               | -2.213803 | 1.593826  |
| 16            | 1             | 0           | 0.289011                | -3.270049 | 0.445538  |
| 17            | 6             | 0           | -2.373008               | -1.379790 | -0.198794 |
| 18            | 1             | 0           | -0.997369               | -2.330898 | -1.428057 |
| 19            | 6             | 0           | -2.815993               | -0.788322 | 1.120466  |
| 20            | 1             | 0           | -3.772333               | -1.241857 | 1.415027  |
| 21            | 1             | 0           | -2.106457               | -1.026153 | 1.918589  |
| 22            | 6             | 0           | -3.003894               | 0.753777  | 1.072302  |
| 23            | 6             | 0           | -1.728876               | 1.465415  | 0.710971  |
| 24            | 1             | 0           | -3.337551               | 1.074423  | 2.068695  |
| 25            | 1             | 0           | -3.816366               | 1.000505  | 0.383623  |
| 26            | 6             | 0           | -1.466066               | 2.211888  | -0.372821 |
| 27            | 1             | 0           | -0.913634               | 1.298004  | 1.413541  |
| 28            | 6             | 0           | -0.087788               | 2.787034  | -0.599775 |
| 29            | 1             | 0           | 0.327441                | 2.428969  | -1.551681 |
| 30            | 1             | 0           | -0.121600               | 3.882556  | -0.669383 |
| 31            | 1             | 0           | 0.610977                | 2.507022  | 0.192301  |
| 32            | 6             | 0           | -3.362817               | -1.231196 | -1.331174 |
| 33            | 1             | 0           | -4.349005               | -1.615548 | -1.041175 |
| 34            | 1             | 0           | -3.037448               | -1.764047 | -2.228651 |
| 35            | 1             | 0           | -3.503382               | -0.178636 | -1.600775 |
| 36            | 6             | 0           | -2.459971               | 2.545030  | -1.458551 |
| 37            | 1             | 0           | -2.509994               | 3.630730  | -1.612155 |
| 38            | 1             | 0           | -3.470970               | 2.191732  | -1.247654 |
| 39            | 1             | 0           | -2.142525               | 2.111675  | -2.416125 |
| 40            | 6             | 0           | 4.292295                | 1.602734  | -0.339797 |
| 41            | 1             | 0           | 4.718381                | 1.990447  | 0.589966  |
| 42            | 1             | 0           | 3.885685                | 2.457071  | -0.894892 |
| 43            | 1             | 0           | 5.102905                | 1.180461  | -0.940970 |

Frequencies -- 22.8604      25.6389      39.9721  
 Frequencies -- 60.3651      68.3171      78.0619  
 Frequencies -- 106.7666      134.7087      140.1025

Zero-point correction= 0.373269 (Hartree/Particle)  
 Thermal correction to Energy= 0.394370  
 Thermal correction to Enthalpy= 0.395314  
 Thermal correction to Gibbs Free Energy= 0.323014  
 Sum of electronic and zero-point Energies= -812.400965  
 Sum of electronic and thermal Energies= -812.379864  
 Sum of electronic and thermal Enthalpies= -812.378920  
 Sum of electronic and thermal Free Energies= -812.451220

ss-1a3c4a5a.log

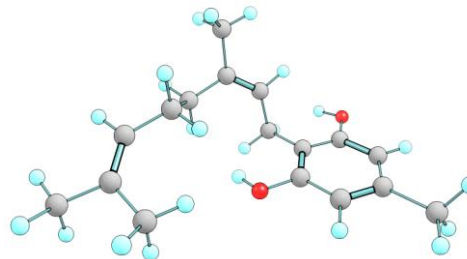

Standard orientation:

| Center Number | Atomic Number | Atomic Type | Coordinates (Angstroms) |           |           |
|---------------|---------------|-------------|-------------------------|-----------|-----------|
|               |               |             | X                       | Y         | Z         |
| 1             | 6             | 0           | 3.130942                | 0.614264  | -0.479766 |
| 2             | 6             | 0           | 4.018793                | -0.312078 | 0.068147  |
| 3             | 6             | 0           | 3.570397                | -1.582676 | 0.444138  |
| 4             | 6             | 0           | 2.225611                | -1.906154 | 0.257647  |
| 5             | 6             | 0           | 1.343656                | -0.970609 | -0.292268 |
| 6             | 6             | 0           | 1.771423                | 0.307588  | -0.687296 |
| 7             | 1             | 0           | 5.056422                | -0.021986 | 0.199961  |
| 8             | 1             | 0           | 1.838257                | -2.880621 | 0.536669  |
| 9             | 8             | 0           | 3.657054                | 1.841069  | -0.791978 |
| 10            | 1             | 0           | 2.994465                | 2.393314  | -1.226816 |
| 11            | 8             | 0           | 0.041178                | -1.383299 | -0.417674 |
| 12            | 1             | 0           | -0.486839               | -0.710834 | -0.866203 |
| 13            | 6             | 0           | 0.806193                | 1.351116  | -1.226439 |
| 14            | 6             | 0           | 0.320311                | 2.275479  | -0.132178 |
| 15            | 1             | 0           | -0.027249               | 0.876455  | -1.753541 |
| 16            | 1             | 0           | 1.299899                | 1.937183  | -2.015931 |
| 17            | 6             | 0           | -0.928805               | 2.438346  | 0.329359  |
| 18            | 1             | 0           | 1.116798                | 2.845424  | 0.346664  |
| 19            | 6             | 0           | -2.142814               | 1.704074  | -0.198340 |
| 20            | 1             | 0           | -2.956501               | 2.426667  | -0.349027 |
| 21            | 1             | 0           | -1.953324               | 1.263966  | -1.182790 |
| 22            | 6             | 0           | -2.649168               | 0.589443  | 0.754526  |
| 23            | 6             | 0           | -3.911929               | -0.047115 | 0.241114  |
| 24            | 1             | 0           | -2.846383               | 1.033014  | 1.739751  |
| 25            | 1             | 0           | -1.850825               | -0.143014 | 0.903136  |
| 26            | 6             | 0           | -4.143315               | -1.334976 | -0.058003 |
| 27            | 1             | 0           | -4.732082               | 0.657095  | 0.087861  |
| 28            | 6             | 0           | -5.491076               | -1.777524 | -0.578004 |
| 29            | 1             | 0           | -5.392619               | -2.252320 | -1.563276 |
| 30            | 1             | 0           | -5.937693               | -2.531545 | 0.083674  |
| 31            | 1             | 0           | -6.193803               | -0.944415 | -0.669231 |
| 32            | 6             | 0           | -1.203913               | 3.398712  | 1.463536  |
| 33            | 1             | 0           | -1.927970               | 4.163906  | 1.155796  |
| 34            | 1             | 0           | -0.294927               | 3.902944  | 1.802560  |
| 35            | 1             | 0           | -1.644205               | 2.883978  | 2.326035  |
| 36            | 6             | 0           | -3.142366               | -2.454942 | 0.088129  |
| 37            | 1             | 0           | -3.519896               | -3.212405 | 0.787672  |
| 38            | 1             | 0           | -2.161975               | -2.130173 | 0.436912  |
| 39            | 1             | 0           | -3.002470               | -2.967990 | -0.872495 |
| 40            | 6             | 0           | 4.535114                | -2.581948 | 1.037785  |
| 41            | 1             | 0           | 4.035149                | -3.518828 | 1.296502  |
| 42            | 1             | 0           | 5.003605                | -2.185370 | 1.945391  |
| 43            | 1             | 0           | 5.343981                | -2.812603 | 0.335426  |

Frequencies -- 18.5990      21.2656      23.8615  
 Frequencies -- 44.6567      51.4150      59.5102  
 Frequencies -- 92.4358      107.9664      125.3618

Zero-point correction= 0.372705 (Hartree/Particle)  
 Thermal correction to Energy= 0.394183  
 Thermal correction to Enthalpy= 0.395128  
 Thermal correction to Gibbs Free Energy= 0.320109  
 Sum of electronic and zero-point Energies= -812.399942  
 Sum of electronic and thermal Energies= -812.378463  
 Sum of electronic and thermal Enthalpies= -812.377519  
 Sum of electronic and thermal Free Energies= -812.452537

# Cannabigerocin-ss-1+3c

## ss-1+3c4a5a.log

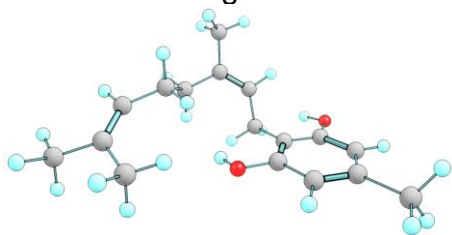

Standard orientation:

| Center Number | Atomic Number | Atomic Type | Coordinates (Angstroms) |           |           |
|---------------|---------------|-------------|-------------------------|-----------|-----------|
|               |               |             | X                       | Y         | Z         |
| 1             | 6             | 0           | 3.131273                | 0.613963  | -0.481037 |
| 2             | 6             | 0           | 4.019379                | -0.312517 | 0.066239  |
| 3             | 6             | 0           | 3.570910                | -1.582788 | 0.443246  |
| 4             | 6             | 0           | 2.225917                | -1.906020 | 0.257862  |
| 5             | 6             | 0           | 1.343743                | -0.970391 | -0.291561 |
| 6             | 6             | 0           | 1.771502                | 0.307580  | -0.687296 |
| 7             | 1             | 0           | 5.057277                | -0.022800 | 0.196735  |
| 8             | 1             | 0           | 1.838591                | -2.880381 | 0.537279  |
| 9             | 8             | 0           | 3.657494                | 1.840441  | -0.794307 |
| 10            | 1             | 0           | 2.994507                | 2.392910  | -1.228257 |
| 11            | 8             | 0           | 0.041115                | -1.382855 | -0.416135 |
| 12            | 1             | 0           | -0.486993               | -0.710378 | -0.864542 |
| 13            | 6             | 0           | 0.806057                | 1.351037  | -1.226166 |
| 14            | 6             | 0           | 0.320293                | 2.275144  | -0.131637 |
| 15            | 1             | 0           | -0.027433               | 0.876301  | -1.753133 |
| 16            | 1             | 0           | 1.299489                | 1.937245  | -2.015720 |
| 17            | 6             | 0           | -0.928776               | 2.437900  | 0.330084  |
| 18            | 1             | 0           | 1.116849                | 2.844925  | 0.347286  |
| 19            | 6             | 0           | -2.142884               | 1.703940  | -0.197833 |
| 20            | 1             | 0           | -2.956303               | 2.426780  | -0.348796 |
| 21            | 1             | 0           | -1.953302               | 1.263701  | -1.182202 |
| 22            | 6             | 0           | -2.649901               | 0.589550  | 0.754968  |
| 23            | 6             | 0           | -3.912455               | -0.046938 | 0.240965  |
| 24            | 1             | 0           | -2.847606               | 1.033323  | 1.739997  |
| 25            | 1             | 0           | -1.851740               | -0.142987 | 0.904180  |
| 26            | 6             | 0           | -4.143645               | -1.334722 | -0.058638 |
| 27            | 1             | 0           | -4.732574               | 0.657275  | 0.087551  |
| 28            | 6             | 0           | -5.491153               | -1.777183 | -0.579356 |
| 29            | 1             | 0           | -5.392247               | -2.251687 | -1.564723 |
| 30            | 1             | 0           | -5.938017               | -2.531423 | 0.081907  |
| 31            | 1             | 0           | -6.193883               | -0.944084 | -0.670639 |
| 32            | 6             | 0           | -1.203683               | 3.397788  | 1.464715  |
| 33            | 1             | 0           | -1.928472               | 4.162601  | 1.157773  |
| 34            | 1             | 0           | -0.294764               | 3.902488  | 1.803221  |
| 35            | 1             | 0           | -1.642966               | 2.882498  | 2.327404  |
| 36            | 6             | 0           | -3.142688               | -2.454675 | 0.087547  |
| 37            | 1             | 0           | -3.520488               | -3.212435 | 0.786620  |
| 38            | 1             | 0           | -2.162491               | -2.129986 | 0.436943  |
| 39            | 1             | 0           | -3.002290               | -2.967342 | -0.873206 |
| 40            | 6             | 0           | 4.535124                | -2.580890 | 1.039664  |
| 41            | 1             | 0           | 4.041216                | -3.527875 | 1.271869  |
| 42            | 1             | 0           | 4.979007                | -2.194729 | 1.964120  |
| 43            | 1             | 0           | 5.361684                | -2.789301 | 0.351263  |

Frequencies -- 16.8366 20.3320 23.8338  
 Frequencies -- 44.7285 51.4985 59.5221  
 Frequencies -- 92.4804 107.9473 125.3849

Zero-point correction= 0.372703 (Hartree/Particle)  
 Thermal correction to Energy= 0.394185  
 Thermal correction to Enthalpy= 0.395129  
 Thermal correction to Gibbs Free Energy= 0.319981  
 Sum of electronic and zero-point Energies= -812.399944  
 Sum of electronic and thermal Energies= -812.378462  
 Sum of electronic and thermal Enthalpies= -812.377518  
 Sum of electronic and thermal Free Energies= -812.452666

# ss-1+3c4+5+.log

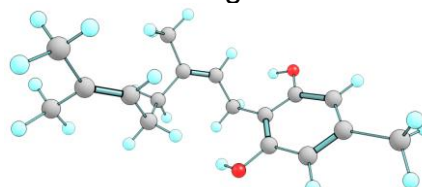

Standard orientation:

| Center Number | Atomic Number | Atomic Type | Coordinates (Angstroms) |           |           |
|---------------|---------------|-------------|-------------------------|-----------|-----------|
|               |               |             | X                       | Y         | Z         |
| 1             | 6             | 0           | 3.012988                | 0.941869  | 0.296384  |
| 2             | 6             | 0           | 3.934546                | 0.023823  | 0.803267  |
| 3             | 6             | 0           | 3.859137                | -1.323363 | 0.439447  |
| 4             | 6             | 0           | 2.864349                | -1.724112 | -0.455531 |
| 5             | 6             | 0           | 1.947853                | -0.797235 | -0.959261 |
| 6             | 6             | 0           | 1.985343                | 0.558314  | -0.586368 |
| 7             | 1             | 0           | 4.704988                | 0.380853  | 1.479173  |
| 8             | 1             | 0           | 2.787371                | -2.756198 | -0.782241 |
| 9             | 8             | 0           | 3.153920                | 2.237355  | 0.727232  |
| 10            | 1             | 0           | 2.606559                | 2.830735  | 0.196450  |
| 11            | 8             | 0           | 1.009448                | -1.302202 | -1.826311 |
| 12            | 1             | 0           | 0.565786                | -0.582865 | -2.293748 |
| 13            | 6             | 0           | 0.938983                | 1.569362  | -1.030919 |
| 14            | 6             | 0           | -0.017709               | 1.920058  | 0.089720  |
| 15            | 1             | 0           | 0.390893                | 1.213456  | -1.906892 |
| 16            | 1             | 0           | 1.439003                | 2.483259  | -1.389808 |
| 17            | 6             | 0           | -1.352941               | 1.795000  | 0.102718  |
| 18            | 1             | 0           | 0.465603                | 2.310177  | 0.984844  |
| 19            | 6             | 0           | -2.166343               | 1.234143  | -1.049056 |
| 20            | 1             | 0           | -3.167070               | 1.681789  | -1.029352 |
| 21            | 1             | 0           | -1.722915               | 1.512442  | -2.011649 |
| 22            | 6             | 0           | -2.326597               | -0.312264 | -1.018267 |
| 23            | 6             | 0           | -2.955216               | -0.846032 | 0.243018  |
| 24            | 1             | 0           | -1.335452               | -0.765522 | -1.129138 |
| 25            | 1             | 0           | -2.905211               | -0.606945 | -1.900260 |
| 26            | 6             | 0           | -4.247831               | -1.141674 | 0.452718  |
| 27            | 1             | 0           | -2.268589               | -0.975842 | 1.079646  |
| 28            | 6             | 0           | -4.724262               | -1.650949 | 1.791824  |
| 29            | 1             | 0           | -5.481426               | -0.979539 | 2.218120  |
| 30            | 1             | 0           | -5.204842               | -2.633089 | 1.690345  |
| 31            | 1             | 0           | -3.906227               | -1.743258 | 2.511921  |
| 32            | 6             | 0           | -2.149838               | 2.217675  | 1.314611  |
| 33            | 1             | 0           | -2.832173               | 3.038146  | 1.056168  |
| 34            | 1             | 0           | -1.508101               | 2.552113  | 2.134850  |
| 35            | 1             | 0           | -2.778038               | 1.395538  | 1.674870  |
| 36            | 6             | 0           | -5.336548               | -0.994419 | -0.581624 |
| 37            | 1             | 0           | -5.849561               | -1.951516 | -0.742409 |
| 38            | 1             | 0           | -4.972668               | -0.637469 | -1.546961 |
| 39            | 1             | 0           | -6.101316               | -0.289631 | -0.230248 |
| 40            | 6             | 0           | 4.825152                | -2.331175 | 1.015607  |
| 41            | 1             | 0           | 5.004773                | -3.155709 | 0.319567  |
| 42            | 1             | 0           | 4.428401                | -2.766206 | 1.941130  |
| 43            | 1             | 0           | 5.786852                | -1.870053 | 1.258517  |

Frequencies -- 12.6349 28.9805 43.4014  
 Frequencies -- 48.5557 54.3655 79.3490  
 Frequencies -- 82.1730 100.5374 134.3855

Zero-point correction= 0.373083 (Hartree/Particle)  
 Thermal correction to Energy= 0.394352  
 Thermal correction to Enthalpy= 0.395297  
 Thermal correction to Gibbs Free Energy= 0.321294  
 Sum of electronic and zero-point Energies= -812.396937  
 Sum of electronic and thermal Energies= -812.375668  
 Sum of electronic and thermal Enthalpies= -812.374724  
 Sum of electronic and thermal Free Energies= -812.448726

ss-1+3c4+5-.log

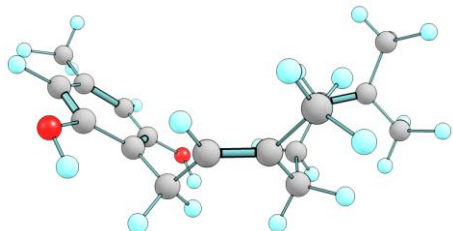

Standard orientation:

| Center Number | Atomic Number | Atomic Type | Coordinates (Angstroms) |           |           |
|---------------|---------------|-------------|-------------------------|-----------|-----------|
|               |               |             | X                       | Y         | Z         |
| 1             | 6             | 0           | -2.867588               | 1.165697  | 0.406652  |
| 2             | 6             | 0           | -3.954447               | 0.346865  | 0.080816  |
| 3             | 6             | 0           | -3.753313               | -0.980919 | -0.301691 |
| 4             | 6             | 0           | -2.445756               | -1.471894 | -0.376294 |
| 5             | 6             | 0           | -1.367094               | -0.648019 | -0.052001 |
| 6             | 6             | 0           | -1.548085               | 0.681326  | 0.374418  |
| 7             | 1             | 0           | -4.952586               | 0.770637  | 0.128063  |
| 8             | 1             | 0           | -2.244494               | -2.489741 | -0.695090 |
| 9             | 8             | 0           | -3.178487               | 2.449077  | 0.773994  |
| 10            | 1             | 0           | -2.372524               | 2.974740  | 0.860141  |
| 11            | 8             | 0           | -0.120775               | -1.211260 | -0.129427 |
| 12            | 1             | 0           | 0.569342                | -0.538900 | -0.253417 |
| 13            | 6             | 0           | -0.344435               | 1.509931  | 0.779172  |
| 14            | 6             | 0           | 0.521728                | 1.898720  | -0.401069 |
| 15            | 1             | 0           | 0.231910                | 0.949791  | 1.523229  |
| 16            | 1             | 0           | -0.664300               | 2.417916  | 1.309192  |
| 17            | 6             | 0           | 1.863586                | 1.883222  | -0.486078 |
| 18            | 1             | 0           | -0.040822               | 2.244464  | -1.268164 |
| 19            | 6             | 0           | 2.780941                | 1.481877  | 0.649273  |
| 20            | 1             | 0           | 3.256458                | 2.391900  | 1.043657  |
| 21            | 1             | 0           | 2.208652                | 1.053898  | 1.476309  |
| 22            | 6             | 0           | 3.901411                | 0.485111  | 0.257801  |
| 23            | 6             | 0           | 3.404174                | -0.771209 | -0.420012 |
| 24            | 1             | 0           | 4.457722                | 0.239084  | 1.169568  |
| 25            | 1             | 0           | 4.614850                | 0.986506  | -0.404692 |
| 26            | 6             | 0           | 2.877588                | -1.854359 | 0.174598  |
| 27            | 1             | 0           | 3.479895                | -0.785134 | -1.507095 |
| 28            | 6             | 0           | 2.427620                | -3.050655 | -0.627768 |
| 29            | 1             | 0           | 2.963316                | -3.954711 | -0.309940 |
| 30            | 1             | 0           | 1.359578                | -3.235084 | -0.469265 |
| 31            | 1             | 0           | 2.595816                | -2.912002 | -1.699758 |
| 32            | 6             | 0           | 2.549554                | 2.343666  | -1.750899 |
| 33            | 1             | 0           | 3.282937                | 3.129301  | -1.529326 |
| 34            | 1             | 0           | 1.835760                | 2.735425  | -2.480106 |
| 35            | 1             | 0           | 3.102731                | 1.525683  | -2.226588 |
| 36            | 6             | 0           | 2.658806                | -1.974940 | 1.662130  |
| 37            | 1             | 0           | 1.581666                | -1.984916 | 1.870199  |
| 38            | 1             | 0           | 3.104433                | -1.156418 | 2.231390  |
| 39            | 1             | 0           | 3.066222                | -2.919688 | 2.042393  |
| 40            | 6             | 0           | -4.927465               | -1.877276 | -0.617263 |
| 41            | 1             | 0           | -4.673195               | -2.611627 | -1.387378 |
| 42            | 1             | 0           | -5.790152               | -1.300852 | -0.963428 |
| 43            | 1             | 0           | -5.242462               | -2.435653 | 0.272866  |

Frequencies -- 17.6737 37.5135 50.2638  
 Frequencies -- 60.9814 62.6204 81.3158  
 Frequencies -- 97.5376 127.1548 138.7150

Zero-point correction= 0.372999 (Hartree/Particle)  
 Thermal correction to Energy= 0.394131  
 Thermal correction to Enthalpy= 0.395076  
 Thermal correction to Gibbs Free Energy= 0.322614  
 Sum of electronic and zero-point Energies= -812.404245  
 Sum of electronic and thermal Energies= -812.383113  
 Sum of electronic and thermal Enthalpies= -812.382169  
 Sum of electronic and thermal Free Energies= -812.454630

ss-1+3c4+5a.log

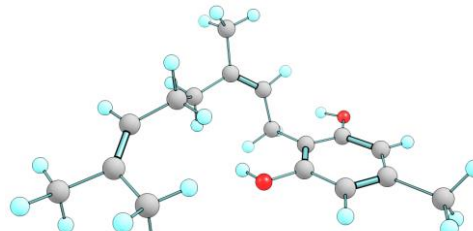

Standard orientation:

| Center Number | Atomic Number | Atomic Type | Coordinates (Angstroms) |           |           |
|---------------|---------------|-------------|-------------------------|-----------|-----------|
|               |               |             | X                       | Y         | Z         |
| 1             | 6             | 0           | 3.131056                | 0.614163  | -0.480011 |
| 2             | 6             | 0           | 4.018807                | -0.312209 | 0.068058  |
| 3             | 6             | 0           | 3.570259                | -1.582669 | 0.444290  |
| 4             | 6             | 0           | 2.225357                | -1.905898 | 0.258144  |
| 5             | 6             | 0           | 1.343491                | -0.970306 | -0.291835 |
| 6             | 6             | 0           | 1.771468                | 0.307694  | -0.687273 |
| 7             | 1             | 0           | 5.056474                | -0.022212 | 0.199783  |
| 8             | 1             | 0           | 1.837826                | -2.880191 | 0.537537  |
| 9             | 8             | 0           | 3.657449                | 1.840728  | -0.792670 |
| 10            | 1             | 0           | 2.994491                | 2.393672  | -1.226050 |
| 11            | 8             | 0           | 0.040909                | -1.382710 | -0.416980 |
| 12            | 1             | 0           | -0.487271               | -0.709774 | -0.864611 |
| 13            | 6             | 0           | 0.806285                | 1.351269  | -1.226458 |
| 14            | 6             | 0           | 0.320393                | 2.275523  | -0.132068 |
| 15            | 1             | 0           | -0.027149               | 0.876615  | -1.753559 |
| 16            | 1             | 0           | 1.300053                | 1.937307  | -2.015898 |
| 17            | 6             | 0           | -0.928685               | 2.438174  | 0.329646  |
| 18            | 1             | 0           | 1.116861                | 2.845474  | 0.346812  |
| 19            | 6             | 0           | -2.142727               | 1.704121  | -0.198304 |
| 20            | 1             | 0           | -2.956158               | 2.426929  | -0.349404 |
| 21            | 1             | 0           | -1.953043               | 1.263852  | -1.182643 |
| 22            | 6             | 0           | -2.649812               | 0.589807  | 0.754522  |
| 23            | 6             | 0           | -3.912147               | -0.046978 | 0.240313  |
| 24            | 1             | 0           | -2.847879               | 1.033722  | 1.739411  |
| 25            | 1             | 0           | -1.851598               | -0.142604 | 0.904077  |
| 26            | 6             | 0           | -4.143255               | -1.334987 | -0.058361 |
| 27            | 1             | 0           | -4.732191               | 0.657151  | 0.086112  |
| 28            | 6             | 0           | -5.490620               | -1.777860 | -0.579099 |
| 29            | 1             | 0           | -5.391440               | -2.253204 | -1.564031 |
| 30            | 1             | 0           | -5.937679               | -2.531519 | 0.082695  |
| 31            | 1             | 0           | -6.193305               | -0.944818 | -0.671271 |
| 32            | 6             | 0           | -1.203734               | 3.398188  | 1.464139  |
| 33            | 1             | 0           | -1.928438               | 4.163002  | 1.156997  |
| 34            | 1             | 0           | -0.294844               | 3.902874  | 1.802739  |
| 35            | 1             | 0           | -1.643179               | 2.882969  | 2.326782  |
| 36            | 6             | 0           | -3.142346               | -2.454826 | 0.089101  |
| 37            | 1             | 0           | -3.520132               | -3.211761 | 0.789067  |
| 38            | 1             | 0           | -2.162107               | -2.129713 | 0.437995  |
| 39            | 1             | 0           | -3.002005               | -2.968575 | -0.871080 |
| 40            | 6             | 0           | 4.535061                | -2.582338 | 1.037132  |
| 41            | 1             | 0           | 4.033329                | -3.516008 | 1.303917  |
| 42            | 1             | 0           | 5.010968                | -2.182716 | 1.939488  |
| 43            | 1             | 0           | 5.338440                | -2.819816 | 0.330710  |

Frequencies -- 13.9228 20.0389 23.9412  
 Frequencies -- 44.5551 51.5876 59.5345  
 Frequencies -- 92.5058 107.9481 125.3441

Zero-point correction= 0.372695 (Hartree/Particle)  
 Thermal correction to Energy= 0.394185  
 Thermal correction to Enthalpy= 0.395129  
 Thermal correction to Gibbs Free Energy= 0.319789  
 Sum of electronic and zero-point Energies= -812.399952  
 Sum of electronic and thermal Energies= -812.378462  
 Sum of electronic and thermal Enthalpies= -812.377518  
 Sum of electronic and thermal Free Energies= -812.452858

ss-1+3c4-5+.log

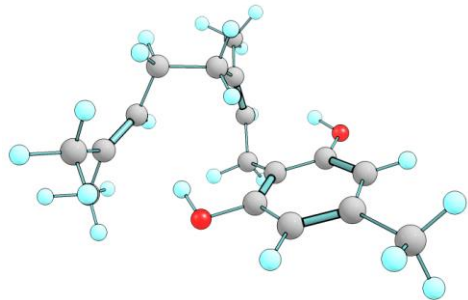

Standard orientation:

| Center Number | Atomic Number | Atomic Type | Coordinates (Angstroms) |           |           |
|---------------|---------------|-------------|-------------------------|-----------|-----------|
|               |               |             | X                       | Y         | Z         |
| 1             | 6             | 0           | -2.262329               | 0.959420  | 0.395980  |
| 2             | 6             | 0           | -3.360592               | 0.331518  | -0.193991 |
| 3             | 6             | 0           | -3.344509               | -1.048001 | -0.425117 |
| 4             | 6             | 0           | -2.197117               | -1.773116 | -0.091770 |
| 5             | 6             | 0           | -1.100101               | -1.137288 | 0.496828  |
| 6             | 6             | 0           | -1.119689               | 0.237507  | 0.790370  |
| 7             | 1             | 0           | -4.216223               | 0.937512  | -0.475206 |
| 8             | 1             | 0           | -2.127735               | -2.836846 | -0.296068 |
| 9             | 8             | 0           | -2.351009               | 2.311307  | 0.605394  |
| 10            | 1             | 0           | -1.450194               | 2.676856  | 0.650731  |
| 11            | 8             | 0           | -0.014768               | -1.926922 | 0.795641  |
| 12            | 1             | 0           | 0.806470                | -1.422747 | 0.655554  |
| 13            | 6             | 0           | -0.021099               | 0.926956  | 1.582092  |
| 14            | 6             | 0           | 0.625973                | 2.158287  | 0.962401  |
| 15            | 1             | 0           | 0.752971                | 0.200879  | 1.850811  |
| 16            | 1             | 0           | -0.457853               | 1.239466  | 2.539099  |
| 17            | 6             | 0           | 1.109719                | 2.313539  | -0.284086 |
| 18            | 1             | 0           | 0.745476                | 2.996500  | 1.648882  |
| 19            | 6             | 0           | 1.115856                | 1.228142  | -1.340523 |
| 20            | 1             | 0           | 0.319925                | 0.503415  | -1.160836 |
| 21            | 1             | 0           | 0.920284                | 1.682455  | -2.319930 |
| 22            | 6             | 0           | 2.467742                | 0.467255  | -1.425489 |
| 23            | 6             | 0           | 2.819524                | -0.267714 | -0.160085 |
| 24            | 1             | 0           | 3.267250                | 1.187625  | -1.645570 |
| 25            | 1             | 0           | 2.421436                | -0.211594 | -2.281087 |
| 26            | 6             | 0           | 2.944550                | -1.595765 | 0.026374  |
| 27            | 1             | 0           | 2.998641                | 0.377630  | 0.699851  |
| 28            | 6             | 0           | 3.321689                | -2.156625 | 1.379102  |
| 29            | 1             | 0           | 2.548319                | -2.844739 | 1.743807  |
| 30            | 1             | 0           | 4.249765                | -2.737917 | 1.311693  |
| 31            | 1             | 0           | 3.461388                | -1.370772 | 2.126512  |
| 32            | 6             | 0           | 1.750296                | 3.614492  | -0.703132 |
| 33            | 1             | 0           | 2.777699                | 3.449855  | -1.050482 |
| 34            | 1             | 0           | 1.779266                | 4.343580  | 0.110860  |
| 35            | 1             | 0           | 1.205795                | 4.058057  | -1.546218 |
| 36            | 6             | 0           | 2.718134                | -2.643109 | -1.036739 |
| 37            | 1             | 0           | 3.604659                | -3.280260 | -1.140715 |
| 38            | 1             | 0           | 2.482352                | -2.224598 | -2.016343 |
| 39            | 1             | 0           | 1.888569                | -3.296775 | -0.741352 |
| 40            | 6             | 0           | -4.544823               | -1.738877 | -1.028039 |
| 41            | 1             | 0           | -4.255697               | -2.644333 | -1.569350 |
| 42            | 1             | 0           | -5.079279               | -1.080909 | -1.719811 |
| 43            | 1             | 0           | -5.256393               | -2.037141 | -0.248163 |

Frequencies -- 30.1792 49.7760 64.0647  
 Frequencies -- 68.5757 74.6983 82.1474  
 Frequencies -- 95.6772 121.2873 148.0086

Zero-point correction= 0.373683 (Hartree/Particle)  
 Thermal correction to Energy= 0.394447  
 Thermal correction to Enthalpy= 0.395391  
 Thermal correction to Gibbs Free Energy= 0.324740  
 Sum of electronic and zero-point Energies= -812.405139  
 Sum of electronic and thermal Energies= -812.384375  
 Sum of electronic and thermal Enthalpies= -812.383431  
 Sum of electronic and thermal Free Energies= -812.454082

ss-1+3c4-5-.log

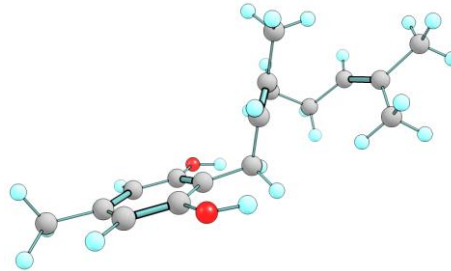

Standard orientation:

| Center Number | Atomic Number | Atomic Type | Coordinates (Angstroms) |           |           |
|---------------|---------------|-------------|-------------------------|-----------|-----------|
|               |               |             | X                       | Y         | Z         |
| 1             | 6             | 0           | 2.559261                | 1.336712  | -0.217274 |
| 2             | 6             | 0           | 3.913987                | 1.228563  | 0.103770  |
| 3             | 6             | 0           | 4.529589                | -0.025414 | 0.145457  |
| 4             | 6             | 0           | 3.772512                | -1.159785 | -0.158262 |
| 5             | 6             | 0           | 2.417873                | -1.041719 | -0.480233 |
| 6             | 6             | 0           | 1.774025                | 0.208093  | -0.517644 |
| 7             | 1             | 0           | 4.470153                | 2.134609  | 0.322254  |
| 8             | 1             | 0           | 4.218611                | -2.149093 | -0.152859 |
| 9             | 8             | 0           | 2.034928                | 2.604079  | -0.203557 |
| 10            | 1             | 0           | 1.136133                | 2.600280  | -0.557667 |
| 11            | 8             | 0           | 1.760935                | -2.218566 | -0.743444 |
| 12            | 1             | 0           | 0.918020                | -2.038778 | -1.179264 |
| 13            | 6             | 0           | 0.280423                | 0.345174  | -0.765657 |
| 14            | 6             | 0           | -0.485681               | 0.523287  | 0.527645  |
| 15            | 1             | 0           | -0.105057               | -0.505537 | -1.333882 |
| 16            | 1             | 0           | 0.086626                | 1.200219  | -1.431014 |
| 17            | 6             | 0           | -1.364898               | -0.328010 | 1.074651  |
| 18            | 1             | 0           | -0.251139               | 1.440245  | 1.067631  |
| 19            | 6             | 0           | -1.766022               | -1.645170 | 0.433206  |
| 20            | 1             | 0           | -0.883529               | -2.163558 | 0.041397  |
| 21            | 1             | 0           | -2.182332               | -2.306525 | 1.202106  |
| 22            | 6             | 0           | -2.807854               | -1.488308 | -0.705734 |
| 23            | 6             | 0           | -4.118916               | -0.920804 | -0.231253 |
| 24            | 1             | 0           | -2.982321               | -2.480005 | -1.143875 |
| 25            | 1             | 0           | -2.377516               | -0.869763 | -1.498471 |
| 26            | 6             | 0           | -4.582595               | 0.328584  | -0.392236 |
| 27            | 1             | 0           | -4.735489               | -1.616833 | 0.339708  |
| 28            | 6             | 0           | -5.920155               | 0.741027  | 0.174457  |
| 29            | 1             | 0           | -5.804523               | 1.573830  | 0.880705  |
| 30            | 1             | 0           | -6.588758               | 1.100346  | -0.619123 |
| 31            | 1             | 0           | -6.419232               | -0.081047 | 0.695434  |
| 32            | 6             | 0           | -2.042678               | -0.007513 | 2.383420  |
| 33            | 1             | 0           | -3.131327               | -0.006427 | 2.253511  |
| 34            | 1             | 0           | -1.739496               | 0.966021  | 2.779626  |
| 35            | 1             | 0           | -1.815058               | -0.772442 | 3.137289  |
| 36            | 6             | 0           | -3.851108               | 1.431037  | -1.118118 |
| 37            | 1             | 0           | -4.458724               | 1.818144  | -1.946476 |
| 38            | 1             | 0           | -2.883476               | 1.121610  | -1.515157 |
| 39            | 1             | 0           | -3.675789               | 2.275890  | -0.439904 |
| 40            | 6             | 0           | 5.983559                | -0.153237 | 0.534058  |
| 41            | 1             | 0           | 6.089812                | -0.243609 | 1.622084  |
| 42            | 1             | 0           | 6.558815                | 0.723885  | 0.223385  |
| 43            | 1             | 0           | 6.440755                | -1.040665 | 0.087040  |

Frequencies -- 17.5417 31.2681 37.4484  
 Frequencies -- 44.2523 54.7741 57.1804  
 Frequencies -- 83.5981 115.1438 134.1323

Zero-point correction= 0.372962 (Hartree/Particle)  
 Thermal correction to Energy= 0.394257  
 Thermal correction to Enthalpy= 0.395201  
 Thermal correction to Gibbs Free Energy= 0.321345  
 Sum of electronic and zero-point Energies= -812.397790  
 Sum of electronic and thermal Energies= -812.376494  
 Sum of electronic and thermal Enthalpies= -812.375550  
 Sum of electronic and thermal Free Energies= -812.449406

ss-1+3c4-5a.log

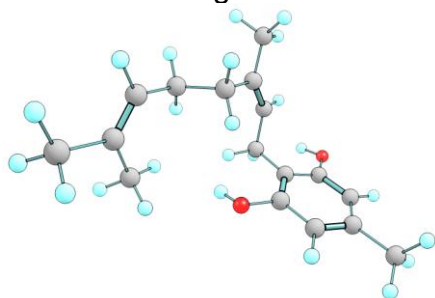

Standard orientation:

| Center Number | Atomic Number | Atomic Type | Coordinates (Angstroms) |           |           |
|---------------|---------------|-------------|-------------------------|-----------|-----------|
|               |               |             | X                       | Y         | Z         |
| 1             | 6             | 0           | -2.874066               | 0.605252  | 0.581812  |
| 2             | 6             | 0           | -3.870223               | -0.153784 | -0.033881 |
| 3             | 6             | 0           | -3.573644               | -1.417255 | -0.553226 |
| 4             | 6             | 0           | -2.274431               | -1.911133 | -0.419212 |
| 5             | 6             | 0           | -1.284178               | -1.145338 | 0.202898  |
| 6             | 6             | 0           | -1.548640               | 0.143699  | 0.699517  |
| 7             | 1             | 0           | -4.872904               | 0.257227  | -0.094699 |
| 8             | 1             | 0           | -2.009685               | -2.898156 | -0.784491 |
| 9             | 8             | 0           | -3.257803               | 1.836242  | 1.049584  |
| 10            | 1             | 0           | -2.571199               | 2.212134  | 1.615013  |
| 11            | 8             | 0           | -0.041088               | -1.729910 | 0.272386  |
| 12            | 1             | 0           | 0.512700                | -1.262013 | 0.909865  |
| 13            | 6             | 0           | -0.473381               | 1.042689  | 1.295554  |
| 14            | 6             | 0           | -0.144597               | 2.254575  | 0.437370  |
| 15            | 1             | 0           | 0.441230                | 0.474270  | 1.487036  |
| 16            | 1             | 0           | -0.783615               | 1.382876  | 2.293336  |
| 17            | 6             | 0           | 0.779444                | 2.308893  | -0.532632 |
| 18            | 1             | 0           | -0.731155               | 3.150836  | 0.633288  |
| 19            | 6             | 0           | 1.660298                | 1.133615  | -0.901693 |
| 20            | 1             | 0           | 1.137468                | 0.184935  | -0.757035 |
| 21            | 1             | 0           | 1.907426                | 1.183889  | -1.969319 |
| 22            | 6             | 0           | 2.981851                | 1.098512  | -0.088514 |
| 23            | 6             | 0           | 3.850830                | -0.063835 | -0.488054 |
| 24            | 1             | 0           | 2.737768                | 1.071049  | 0.978399  |
| 25            | 1             | 0           | 3.523715                | 2.038420  | -0.252269 |
| 26            | 6             | 0           | 3.956301                | -1.253932 | 0.123414  |
| 27            | 1             | 0           | 4.409051                | 0.077316  | -1.414362 |
| 28            | 6             | 0           | 4.831079                | -2.348503 | -0.438376 |
| 29            | 1             | 0           | 5.602556                | -2.644395 | 0.284760  |
| 30            | 1             | 0           | 4.241046                | -3.250756 | -0.647104 |
| 31            | 1             | 0           | 5.328020                | -2.044266 | -1.363805 |
| 32            | 6             | 0           | 1.031184                | 3.578604  | -1.306830 |
| 33            | 1             | 0           | 2.085896                | 3.874597  | -1.238123 |
| 34            | 1             | 0           | 0.419958                | 4.411605  | -0.948443 |
| 35            | 1             | 0           | 0.820542                | 3.430340  | -2.373776 |
| 36            | 6             | 0           | 3.225257                | -1.635238 | 1.388167  |
| 37            | 1             | 0           | 2.509010                | -2.442660 | 1.185148  |
| 38            | 1             | 0           | 2.688063                | -0.801921 | 1.848641  |
| 39            | 1             | 0           | 3.922470                | -2.027577 | 2.138668  |
| 40            | 6             | 0           | -4.636809               | -2.225245 | -1.258676 |
| 41            | 1             | 0           | -4.421127               | -3.296527 | -1.214243 |
| 42            | 1             | 0           | -4.699125               | -1.946764 | -2.317802 |
| 43            | 1             | 0           | -5.624629               | -2.054566 | -0.820276 |

Frequencies -- 11.8227 25.8758 41.2874  
 Frequencies -- 57.2180 68.7852 77.6582  
 Frequencies -- 83.4283 100.4432 135.3828

Zero-point correction= 0.373101 (Hartree/Particle)  
 Thermal correction to Energy= 0.394372  
 Thermal correction to Enthalpy= 0.395317  
 Thermal correction to Gibbs Free Energy= 0.321545  
 Sum of electronic and zero-point Energies= -812.397736  
 Sum of electronic and thermal Energies= -812.376465  
 Sum of electronic and thermal Enthalpies= -812.375521  
 Sum of electronic and thermal Free Energies= -812.449292

ss-1+3c4a5+.log

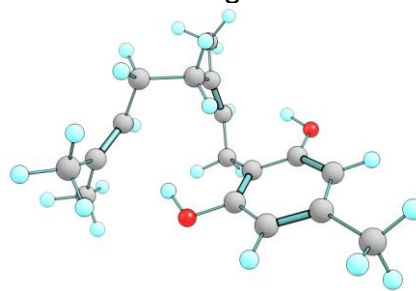

Standard orientation:

| Center Number | Atomic Number | Atomic Type | Coordinates (Angstroms) |           |           |
|---------------|---------------|-------------|-------------------------|-----------|-----------|
|               |               |             | X                       | Y         | Z         |
| 1             | 6             | 0           | -2.262587               | 0.959203  | 0.395991  |
| 2             | 6             | 0           | -3.360658               | 0.331041  | -0.194048 |
| 3             | 6             | 0           | -3.344247               | -1.048471 | -0.425163 |
| 4             | 6             | 0           | -2.196715               | -1.773329 | -0.091767 |
| 5             | 6             | 0           | -1.099873               | -1.137261 | 0.496888  |
| 6             | 6             | 0           | -1.119832               | 0.237537  | 0.790478  |
| 7             | 1             | 0           | -4.216393               | 0.936833  | -0.475382 |
| 8             | 1             | 0           | -2.127056               | -2.837031 | -0.296107 |
| 9             | 8             | 0           | -2.351482               | 2.311080  | 0.605327  |
| 10            | 1             | 0           | -1.450702               | 2.676744  | 0.650556  |
| 11            | 8             | 0           | -0.014336               | -1.926608 | 0.795756  |
| 12            | 1             | 0           | 0.806788                | -1.422321 | 0.655363  |
| 13            | 6             | 0           | -0.021366               | 0.927254  | 1.582178  |
| 14            | 6             | 0           | 0.625597                | 2.158540  | 0.962322  |
| 15            | 1             | 0           | 0.752740                | 0.201285  | 1.851015  |
| 16            | 1             | 0           | -0.458223               | 1.239886  | 2.539089  |
| 17            | 6             | 0           | 1.109352                | 2.313675  | -0.284174 |
| 18            | 1             | 0           | 0.744960                | 2.996876  | 1.648665  |
| 19            | 6             | 0           | 1.115675                | 1.228188  | -1.340526 |
| 20            | 1             | 0           | 0.319792                | 0.503411  | -1.160870 |
| 21            | 1             | 0           | 0.920164                | 1.682448  | -2.319972 |
| 22            | 6             | 0           | 2.467641                | 0.467412  | -1.425360 |
| 23            | 6             | 0           | 2.819384                | -0.267552 | -0.159944 |
| 24            | 1             | 0           | 3.267087                | 1.187857  | -1.645375 |
| 25            | 1             | 0           | 2.421444                | -0.211442 | -2.280960 |
| 26            | 6             | 0           | 2.944798                | -1.595572 | 0.026442  |
| 27            | 1             | 0           | 2.998155                | 0.377790  | 0.700064  |
| 28            | 6             | 0           | 3.321823                | -2.156396 | 1.379209  |
| 29            | 1             | 0           | 2.548784                | -2.845090 | 1.743508  |
| 30            | 1             | 0           | 4.250317                | -2.737041 | 1.312035  |
| 31            | 1             | 0           | 3.460707                | -1.370572 | 2.126800  |
| 32            | 6             | 0           | 1.749776                | 3.614665  | -0.703365 |
| 33            | 1             | 0           | 2.777124                | 3.450082  | -1.050895 |
| 34            | 1             | 0           | 1.778838                | 4.343798  | 0.110582  |
| 35            | 1             | 0           | 1.205094                | 4.058152  | -1.546374 |
| 36            | 6             | 0           | 2.718803                | -2.642921 | -1.036770 |
| 37            | 1             | 0           | 3.605043                | -3.280609 | -1.139768 |
| 38            | 1             | 0           | 2.484257                | -2.224393 | -2.016659 |
| 39            | 1             | 0           | 1.888549                | -3.296044 | -0.742114 |
| 40            | 6             | 0           | -4.544395               | -1.739610 | -1.028117 |
| 41            | 1             | 0           | -4.255032               | -2.644812 | -1.569722 |
| 42            | 1             | 0           | -5.079228               | -1.081636 | -1.719588 |
| 43            | 1             | 0           | -5.255705               | -2.038367 | -0.248190 |

Frequencies -- 30.1931 49.7708 64.0701  
 Frequencies -- 68.6043 74.6984 82.1510  
 Frequencies -- 95.7058 121.3381 148.0860

Zero-point correction= 0.373684 (Hartree/Particle)  
 Thermal correction to Energy= 0.394448  
 Thermal correction to Enthalpy= 0.395392  
 Thermal correction to Gibbs Free Energy= 0.324743  
 Sum of electronic and zero-point Energies= -812.405138  
 Sum of electronic and thermal Energies= -812.384374  
 Sum of electronic and thermal Enthalpies= -812.383430  
 Sum of electronic and thermal Free Energies= -812.454079

ss-1+3c4a5-.log

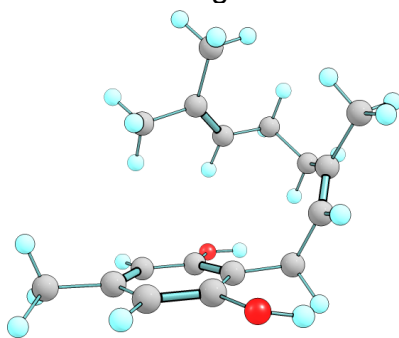

Standard orientation:

| Center Number | Atomic Number | Atomic Type | Coordinates (Angstroms) |           |           |
|---------------|---------------|-------------|-------------------------|-----------|-----------|
|               |               |             | X                       | Y         | Z         |
| 1             | 6             | 0           | 1.902776                | -1.330915 | -0.770480 |
| 2             | 6             | 0           | 2.932552                | -0.418666 | -1.004985 |
| 3             | 6             | 0           | 3.213309                | 0.581858  | -0.070119 |
| 4             | 6             | 0           | 2.460209                | 0.634836  | 1.103833  |
| 5             | 6             | 0           | 1.423375                | -0.276987 | 1.324978  |
| 6             | 6             | 0           | 1.103178                | -1.275020 | 0.387860  |
| 7             | 1             | 0           | 3.509866                | -0.511276 | -1.919308 |
| 8             | 1             | 0           | 2.658421                | 1.384309  | 1.863368  |
| 9             | 8             | 0           | 1.703844                | -2.278230 | -1.743768 |
| 10            | 1             | 0           | 1.144602                | -2.991021 | -1.409129 |
| 11            | 8             | 0           | 0.747148                | -0.117699 | 2.508329  |
| 12            | 1             | 0           | 0.059493                | -0.789615 | 2.595547  |
| 13            | 6             | 0           | -0.065612               | -2.236064 | 0.565068  |
| 14            | 6             | 0           | -1.195546               | -1.986102 | -0.414859 |
| 15            | 1             | 0           | -0.438149               | -2.215284 | 1.592989  |
| 16            | 1             | 0           | 0.289801                | -3.270617 | 0.443959  |
| 17            | 6             | 0           | -2.372540               | -1.380115 | -0.199001 |
| 18            | 1             | 0           | -0.997276               | -2.331068 | -1.428794 |
| 19            | 6             | 0           | -2.815208               | -0.789004 | 1.120523  |
| 20            | 1             | 0           | -3.771383               | -1.242768 | 1.415273  |
| 21            | 1             | 0           | -2.105372               | -1.026869 | 1.918358  |
| 22            | 6             | 0           | -3.003354               | 0.753059  | 1.072780  |
| 23            | 6             | 0           | -1.728579               | 1.464922  | 0.711033  |
| 24            | 1             | 0           | -3.336609               | 1.073441  | 2.069393  |
| 25            | 1             | 0           | -3.816167               | 0.999839  | 0.384519  |
| 26            | 6             | 0           | -1.466493               | 2.212063  | -0.372470 |
| 27            | 1             | 0           | -0.912914               | 1.297135  | 1.413015  |
| 28            | 6             | 0           | -0.088416               | 2.787520  | -0.599875 |
| 29            | 1             | 0           | 0.326203                | 2.430307  | -1.552363 |
| 30            | 1             | 0           | -0.122389               | 3.883097  | -0.668536 |
| 31            | 1             | 0           | 0.610890                | 2.506918  | 0.191516  |
| 32            | 6             | 0           | -3.362519               | -1.231005 | -1.331157 |
| 33            | 1             | 0           | -4.348683               | -1.615413 | -1.041147 |
| 34            | 1             | 0           | -3.037333               | -1.763514 | -2.228902 |
| 35            | 1             | 0           | -3.503061               | -0.178324 | -1.600301 |
| 36            | 6             | 0           | -2.461091               | 2.545727  | -1.457401 |
| 37            | 1             | 0           | -2.511314               | 3.631505  | -1.610386 |
| 38            | 1             | 0           | -3.471927               | 2.192215  | -1.246080 |
| 39            | 1             | 0           | -2.144197               | 2.112928  | -2.415411 |
| 40            | 6             | 0           | 4.291499                | 1.603858  | -0.339145 |
| 41            | 1             | 0           | 4.717550                | 1.991202  | 0.590789  |
| 42            | 1             | 0           | 3.884595                | 2.458378  | -0.893740 |
| 43            | 1             | 0           | 5.102179                | 1.182133  | -0.940607 |

|                |          |          |          |
|----------------|----------|----------|----------|
| Frequencies -- | 22.6951  | 25.8359  | 39.9484  |
| Frequencies -- | 60.1927  | 68.2675  | 78.0250  |
| Frequencies -- | 106.7216 | 134.6628 | 140.1756 |

Zero-point correction= 0.373264 (Hartree/Particle)  
 Thermal correction to Energy= 0.394368  
 Thermal correction to Enthalpy= 0.395312  
 Thermal correction to Gibbs Free Energy= 0.323003  
 Sum of electronic and zero-point Energies= -812.400970  
 Sum of electronic and thermal Energies= -812.379866  
 Sum of electronic and thermal Enthalpies= -812.378922  
 Sum of electronic and thermal Free Energies= -812.451230

ss-1+3c4a5a.log

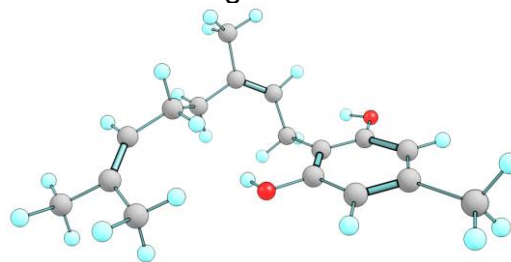

Standard orientation:

| Center Number | Atomic Number | Atomic Type | Coordinates (Angstroms) |           |           |
|---------------|---------------|-------------|-------------------------|-----------|-----------|
|               |               |             | X                       | Y         | Z         |
| 1             | 6             | 0           | 3.131273                | 0.613963  | -0.481037 |
| 2             | 6             | 0           | 4.019379                | -0.312517 | 0.066239  |
| 3             | 6             | 0           | 3.570910                | -1.582788 | 0.443246  |
| 4             | 6             | 0           | 2.225917                | -1.906020 | 0.257862  |
| 5             | 6             | 0           | 1.343743                | -0.970391 | -0.291561 |
| 6             | 6             | 0           | 1.771502                | 0.307580  | -0.687296 |
| 7             | 1             | 0           | 5.057277                | -0.022800 | 0.196735  |
| 8             | 1             | 0           | 1.838591                | -2.880381 | 0.537279  |
| 9             | 8             | 0           | 3.657494                | 1.840441  | -0.794307 |
| 10            | 1             | 0           | 2.994507                | 2.392910  | -1.228257 |
| 11            | 8             | 0           | 0.041115                | -1.382855 | -0.416135 |
| 12            | 1             | 0           | -0.486993               | -0.710378 | -0.864542 |
| 13            | 6             | 0           | 0.806057                | 1.351037  | -1.226166 |
| 14            | 6             | 0           | 0.320293                | 2.275144  | -0.131637 |
| 15            | 1             | 0           | -0.027433               | 0.876301  | -1.753133 |
| 16            | 1             | 0           | 1.299489                | 1.937245  | -2.015720 |
| 17            | 6             | 0           | -0.928776               | 2.437900  | 0.330084  |
| 18            | 1             | 0           | 1.116849                | 2.844925  | 0.347286  |
| 19            | 6             | 0           | -2.142884               | 1.703940  | -0.197833 |
| 20            | 1             | 0           | -2.956303               | 2.426780  | -0.348796 |
| 21            | 1             | 0           | -1.953302               | 1.263701  | -1.182202 |
| 22            | 6             | 0           | -2.649901               | 0.589550  | 0.754968  |
| 23            | 6             | 0           | -3.912455               | -0.046938 | 0.240965  |
| 24            | 1             | 0           | -2.847606               | 1.033323  | 1.739997  |
| 25            | 1             | 0           | -1.851740               | -0.142987 | 0.904180  |
| 26            | 6             | 0           | -4.143645               | -1.334722 | -0.058638 |
| 27            | 1             | 0           | -4.732574               | 0.657275  | 0.087551  |
| 28            | 6             | 0           | -5.491153               | -1.777183 | -0.579356 |
| 29            | 1             | 0           | -5.392247               | -2.251687 | -1.564723 |
| 30            | 1             | 0           | -5.938017               | -2.531423 | 0.081907  |
| 31            | 1             | 0           | -6.193883               | -0.944084 | -0.670639 |
| 32            | 6             | 0           | -1.203683               | 3.397788  | 1.464715  |
| 33            | 1             | 0           | -1.928472               | 4.162601  | 1.157773  |
| 34            | 1             | 0           | -0.294764               | 3.902488  | 1.803221  |
| 35            | 1             | 0           | -1.642966               | 2.882498  | 2.327404  |
| 36            | 6             | 0           | -3.142688               | -2.454675 | 0.087547  |
| 37            | 1             | 0           | -3.520488               | -3.212435 | 0.786620  |
| 38            | 1             | 0           | -2.162491               | -2.129986 | 0.436943  |
| 39            | 1             | 0           | -3.002290               | -2.967342 | -0.873206 |
| 40            | 6             | 0           | 4.535124                | -2.580890 | 1.039664  |
| 41            | 1             | 0           | 4.041216                | -3.527875 | 1.271869  |
| 42            | 1             | 0           | 4.979007                | -2.194729 | 1.964120  |
| 43            | 1             | 0           | 5.361684                | -2.789301 | 0.351263  |

|                |         |          |          |
|----------------|---------|----------|----------|
| Frequencies -- | 16.8366 | 20.3320  | 23.8338  |
| Frequencies -- | 44.7285 | 51.4985  | 59.5221  |
| Frequencies -- | 92.4804 | 107.9473 | 125.3849 |

Zero-point correction= 0.372703 (Hartree/Particle)  
 Thermal correction to Energy= 0.394185  
 Thermal correction to Enthalpy= 0.395129  
 Thermal correction to Gibbs Free Energy= 0.319981  
 Sum of electronic and zero-point Energies= -812.399944  
 Sum of electronic and thermal Energies= -812.378462  
 Sum of electronic and thermal Enthalpies= -812.377518  
 Sum of electronic and thermal Free Energies= -812.452666

**Cannabigerocin-ss-1-3c**  
ss-1-3c4-5a.log

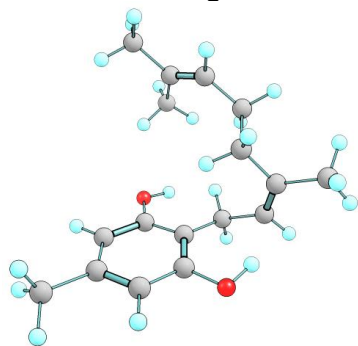

Standard orientation:

| Center Number | Atomic Number | Atomic Type | Coordinates (Angstroms) |           |           |
|---------------|---------------|-------------|-------------------------|-----------|-----------|
|               |               |             | X                       | Y         | Z         |
| 1             | 6             | 0           | -1.444251               | -0.972674 | 1.038167  |
| 2             | 6             | 0           | -2.370888               | -1.761533 | 0.352713  |
| 3             | 6             | 0           | -3.218218               | -1.188592 | -0.597894 |
| 4             | 6             | 0           | -3.115750               | 0.180946  | -0.847850 |
| 5             | 6             | 0           | -2.183188               | 0.967438  | -0.162907 |
| 6             | 6             | 0           | -1.314002               | 0.410951  | 0.800207  |
| 7             | 1             | 0           | -2.420690               | -2.820720 | 0.584425  |
| 8             | 1             | 0           | -3.753546               | 0.666437  | -1.579960 |
| 9             | 8             | 0           | -0.678321               | -1.636722 | 1.963873  |
| 10            | 1             | 0           | -0.099138               | -1.019186 | 2.428377  |
| 11            | 8             | 0           | -2.183402               | 2.298421  | -0.473525 |
| 12            | 1             | 0           | -1.340952               | 2.689252  | -0.175232 |
| 13            | 6             | 0           | -0.312680               | 1.233940  | 1.608922  |
| 14            | 6             | 0           | 0.283008                | 2.474702  | 0.959091  |
| 15            | 1             | 0           | 0.531586                | 0.586447  | 1.884515  |
| 16            | 1             | 0           | -0.776362               | 1.532159  | 2.557106  |
| 17            | 6             | 0           | 1.086116                | 2.484697  | -0.122114 |
| 18            | 1             | 0           | 0.077862                | 3.419788  | 1.460075  |
| 19            | 6             | 0           | 1.498978                | 1.213363  | -0.829119 |
| 20            | 1             | 0           | 0.743868                | 0.434536  | -0.696433 |
| 21            | 1             | 0           | 1.582605                | 1.393653  | -1.907836 |
| 22            | 6             | 0           | 2.856095                | 0.670885  | -0.300802 |
| 23            | 6             | 0           | 3.180242                | -0.667769 | -0.905546 |
| 24            | 1             | 0           | 2.807091                | 0.613818  | 0.790887  |
| 25            | 1             | 0           | 3.647222                | 1.393100  | -0.539223 |
| 26            | 6             | 0           | 3.055751                | -1.872961 | -0.327268 |
| 27            | 1             | 0           | 3.490109                | -0.636784 | -1.951055 |
| 28            | 6             | 0           | 3.343390                | -3.140033 | -1.095975 |
| 29            | 1             | 0           | 4.144531                | -3.717703 | -0.616291 |
| 30            | 1             | 0           | 2.460395                | -3.792900 | -1.112795 |
| 31            | 1             | 0           | 3.637690                | -2.938599 | -2.129935 |
| 32            | 6             | 0           | 1.673081                | 3.764674  | -0.656934 |
| 33            | 1             | 0           | 2.768690                | 3.709574  | -0.672498 |
| 34            | 1             | 0           | 1.382467                | 4.634715  | -0.062081 |
| 35            | 1             | 0           | 1.355514                | 3.930089  | -1.693828 |
| 36            | 6             | 0           | 2.604545                | -2.098162 | 1.095979  |
| 37            | 1             | 0           | 1.588676                | -2.511723 | 1.121549  |
| 38            | 1             | 0           | 2.601054                | -1.185597 | 1.696000  |
| 39            | 1             | 0           | 3.256388                | -2.824844 | 1.596201  |
| 40            | 6             | 0           | -4.196789               | -2.041381 | -1.369997 |
| 41            | 1             | 0           | -5.081826               | -1.468936 | -1.662928 |
| 42            | 1             | 0           | -4.523581               | -2.905439 | -0.784113 |
| 43            | 1             | 0           | -3.738508               | -2.425671 | -2.289741 |

|                |         |          |          |
|----------------|---------|----------|----------|
| Frequencies -- | 22.6446 | 28.1930  | 44.2415  |
| Frequencies -- | 47.8939 | 57.8674  | 80.2251  |
| Frequencies -- | 83.8436 | 105.4740 | 122.1346 |

Zero-point correction= 0.372801 (Hartree/Particle)  
 Thermal correction to Energy= 0.394079  
 Thermal correction to Enthalpy= 0.395023  
 Thermal correction to Gibbs Free Energy= 0.321682  
 Sum of electronic and zero-point Energies= -812.401052  
 Sum of electronic and thermal Energies= -812.379774  
 Sum of electronic and thermal Enthalpies= -812.378830  
 Sum of electronic and thermal Free Energies= -812.452171

ss-1-3c4+5+.log

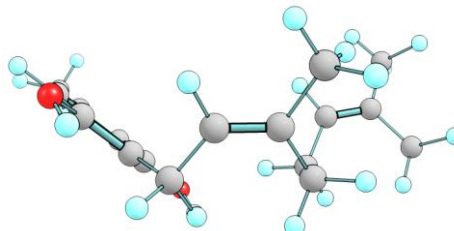

Standard orientation:

| Center Number | Atomic Number | Atomic Type | Coordinates (Angstroms) |           |           |
|---------------|---------------|-------------|-------------------------|-----------|-----------|
|               |               |             | X                       | Y         | Z         |
| 1             | 6             | 0           | 1.947762                | -0.797103 | -0.959340 |
| 2             | 6             | 0           | 2.864208                | -1.724082 | -0.455676 |
| 3             | 6             | 0           | 3.858963                | -1.323489 | 0.439383  |
| 4             | 6             | 0           | 3.934413                | 0.023670  | 0.803361  |
| 5             | 6             | 0           | 3.012921                | 0.941800  | 0.296549  |
| 6             | 6             | 0           | 1.985290                | 0.558392  | -0.586305 |
| 7             | 1             | 0           | 2.787167                | -2.756134 | -0.782488 |
| 8             | 1             | 0           | 4.704836                | 0.380566  | 1.479360  |
| 9             | 8             | 0           | 1.009378                | -1.301960 | -1.826476 |
| 10            | 1             | 0           | 0.565734                | -0.582566 | -2.293844 |
| 11            | 8             | 0           | 3.153838                | 2.237229  | 0.727599  |
| 12            | 1             | 0           | 2.606811                | 2.830734  | 0.196606  |
| 13            | 6             | 0           | 0.939045                | 1.569558  | -1.030832 |
| 14            | 6             | 0           | -0.017740               | 1.920218  | 0.089741  |
| 15            | 1             | 0           | 0.391023                | 1.213817  | -1.906920 |
| 16            | 1             | 0           | 1.439174                | 2.483464  | -1.389545 |
| 17            | 6             | 0           | -1.352963               | 1.795097  | 0.102672  |
| 18            | 1             | 0           | 0.465526                | 2.310333  | 0.984896  |
| 19            | 6             | 0           | -2.166297               | 1.234237  | -1.049148 |
| 20            | 1             | 0           | -3.167013               | 1.681919  | -1.029500 |
| 21            | 1             | 0           | -1.722809               | 1.512514  | -2.011719 |
| 22            | 6             | 0           | -2.326567               | -0.312160 | -1.018348 |
| 23            | 6             | 0           | -2.955051               | -0.845964 | 0.242989  |
| 24            | 1             | 0           | -1.335423               | -0.765415 | -1.129317 |
| 25            | 1             | 0           | -2.905251               | -0.606846 | -1.900290 |
| 26            | 6             | 0           | -4.247617               | -1.141761 | 0.452778  |
| 27            | 1             | 0           | -2.268352               | -0.975690 | 1.079572  |
| 28            | 6             | 0           | -4.723892               | -1.651115 | 1.791910  |
| 29            | 1             | 0           | -5.480855               | -0.979615 | 2.218423  |
| 30            | 1             | 0           | -5.204670               | -2.633156 | 1.690405  |
| 31            | 1             | 0           | -3.905740               | -1.743661 | 2.511845  |
| 32            | 6             | 0           | -2.149965               | 2.217763  | 1.314502  |
| 33            | 1             | 0           | -2.831872               | 3.038611  | 1.056102  |
| 34            | 1             | 0           | -1.508279               | 2.551718  | 2.134979  |
| 35            | 1             | 0           | -2.778596               | 1.395795  | 1.674375  |
| 36            | 6             | 0           | -5.336411               | -0.994726 | -0.581519 |
| 37            | 1             | 0           | -5.848510               | -1.952191 | -0.743070 |
| 38            | 1             | 0           | -4.972808               | -0.636701 | -1.546561 |
| 39            | 1             | 0           | -6.101869               | -0.290943 | -0.229641 |
| 40            | 6             | 0           | 4.824987                | -2.331362 | 1.015413  |
| 41            | 1             | 0           | 5.786881                | -1.870375 | 1.257820  |
| 42            | 1             | 0           | 5.004127                | -3.156114 | 0.319514  |
| 43            | 1             | 0           | 4.428530                | -2.766051 | 1.941226  |

|                |         |          |          |
|----------------|---------|----------|----------|
| Frequencies -- | 12.6102 | 28.9964  | 43.4104  |
| Frequencies -- | 48.5593 | 54.3118  | 79.3660  |
| Frequencies -- | 82.1694 | 100.5467 | 134.3844 |

Zero-point correction= 0.373083 (Hartree/Particle)  
 Thermal correction to Energy= 0.394352  
 Thermal correction to Enthalpy= 0.395297  
 Thermal correction to Gibbs Free Energy= 0.321293  
 Sum of electronic and zero-point Energies= -812.396937  
 Sum of electronic and thermal Energies= -812.375668  
 Sum of electronic and thermal Enthalpies= -812.374723  
 Sum of electronic and thermal Free Energies= -812.448727

ss-1-3c4+5-.log

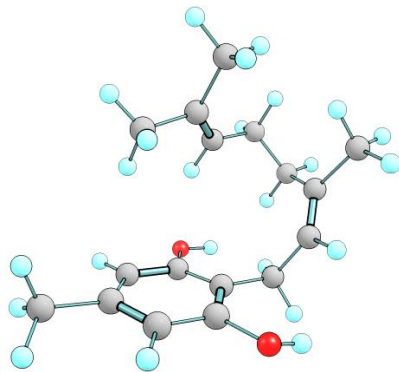

Standard orientation:

| Center Number | Atomic Number | Atomic Type | Coordinates (Angstroms) |           |           |
|---------------|---------------|-------------|-------------------------|-----------|-----------|
|               |               |             | X                       | Y         | Z         |
| 1             | 6             | 0           | 1.423293                | -0.277218 | 1.325084  |
| 2             | 6             | 0           | 2.460104                | 0.634630  | 1.103806  |
| 3             | 6             | 0           | 3.213056                | 0.581683  | -0.070216 |
| 4             | 6             | 0           | 2.932235                | -0.418894 | -1.005043 |
| 5             | 6             | 0           | 1.902491                | -1.331111 | -0.770428 |
| 6             | 6             | 0           | 1.102993                | -1.275218 | 0.387995  |
| 7             | 1             | 0           | 2.658357                | 1.384120  | 1.863314  |
| 8             | 1             | 0           | 3.509509                | -0.511546 | -1.919388 |
| 9             | 8             | 0           | 0.747211                | -0.117926 | 2.508511  |
| 10            | 1             | 0           | 0.059276                | -0.789573 | 2.595605  |
| 11            | 8             | 0           | 1.703269                | -2.278382 | -1.743730 |
| 12            | 1             | 0           | 1.145179                | -2.991803 | -1.408487 |
| 13            | 6             | 0           | -0.065859               | -2.236175 | 0.565223  |
| 14            | 6             | 0           | -1.195663               | -1.986165 | -0.414836 |
| 15            | 1             | 0           | -0.438481               | -2.215250 | 1.593112  |
| 16            | 1             | 0           | 0.289457                | -3.270779 | 0.444255  |
| 17            | 6             | 0           | -2.372556               | -1.379929 | -0.199128 |
| 18            | 1             | 0           | -0.997306               | -2.331268 | -1.428698 |
| 19            | 6             | 0           | -2.815290               | -0.788713 | 1.120342  |
| 20            | 1             | 0           | -3.771538               | -1.242389 | 1.414995  |
| 21            | 1             | 0           | -2.105564               | -1.026653 | 1.918255  |
| 22            | 6             | 0           | -3.003252               | 0.753342  | 1.072559  |
| 23            | 6             | 0           | -1.728334               | 1.465110  | 0.711109  |
| 24            | 1             | 0           | -3.336712               | 1.073802  | 2.069084  |
| 25            | 1             | 0           | -3.815868               | 1.000222  | 0.384102  |
| 26            | 6             | 0           | -1.465993               | 2.212315  | -0.372288 |
| 27            | 1             | 0           | -0.912827               | 1.297269  | 1.413258  |
| 28            | 6             | 0           | -0.087841               | 2.787720  | -0.599368 |
| 29            | 1             | 0           | 0.327209                | 2.430068  | -1.551508 |
| 30            | 1             | 0           | -0.121839               | 3.883258  | -0.668549 |
| 31            | 1             | 0           | 0.611150                | 2.507507  | 0.192439  |
| 32            | 6             | 0           | -3.362427               | -1.230776 | -1.331375 |
| 33            | 1             | 0           | -4.348678               | -1.615011 | -1.041427 |
| 34            | 1             | 0           | -3.037239               | -1.763399 | -2.229052 |
| 35            | 1             | 0           | -3.502788               | -0.178095 | -1.600618 |
| 36            | 6             | 0           | -2.460285               | 2.545883  | -1.457528 |
| 37            | 1             | 0           | -2.510207               | 3.631612  | -1.610912 |
| 38            | 1             | 0           | -3.471251               | 2.192678  | -1.246305 |
| 39            | 1             | 0           | -2.143288               | 2.112653  | -2.415314 |
| 40            | 6             | 0           | 4.291101                | 1.603767  | -0.339495 |
| 41            | 1             | 0           | 5.101972                | 1.181940  | -0.940627 |
| 42            | 1             | 0           | 4.716896                | 1.991653  | 0.590326  |
| 43            | 1             | 0           | 3.884102                | 2.457928  | -0.894585 |

|                |          |          |          |
|----------------|----------|----------|----------|
| Frequencies -- | 22.7060  | 25.7392  | 39.9542  |
| Frequencies -- | 60.4068  | 68.2914  | 78.0421  |
| Frequencies -- | 106.7354 | 134.6668 | 140.1435 |

Zero-point correction= 0.373266 (Hartree/Particle)  
 Thermal correction to Energy= 0.394369  
 Thermal correction to Enthalpy= 0.395313  
 Thermal correction to Gibbs Free Energy= 0.323006  
 Sum of electronic and zero-point Energies= -812.400968  
 Sum of electronic and thermal Energies= -812.379865  
 Sum of electronic and thermal Enthalpies= -812.378921  
 Sum of electronic and thermal Free Energies= -812.451227

ss-1-3c4+5a.log

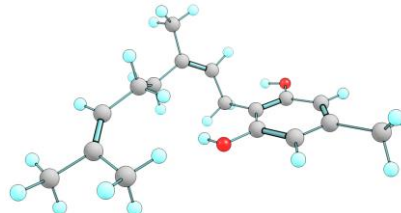

Standard orientation:

| Center Number | Atomic Number | Atomic Type | Coordinates (Angstroms) |           |           |
|---------------|---------------|-------------|-------------------------|-----------|-----------|
|               |               |             | X                       | Y         | Z         |
| 1             | 6             | 0           | 1.345569                | -0.966260 | -0.284799 |
| 2             | 6             | 0           | 2.225192                | -1.901482 | 0.260876  |
| 3             | 6             | 0           | 3.574842                | -1.580538 | 0.440430  |
| 4             | 6             | 0           | 4.023709                | -0.314774 | 0.060599  |
| 5             | 6             | 0           | 3.133884                | 0.615827  | -0.485469 |
| 6             | 6             | 0           | 1.775732                | 0.312981  | -0.685379 |
| 7             | 1             | 0           | 1.837780                | -2.875156 | 0.543729  |
| 8             | 1             | 0           | 5.062283                | -0.026313 | 0.185756  |
| 9             | 8             | 0           | 0.040258                | -1.371672 | -0.405220 |
| 10            | 1             | 0           | -0.484781               | -0.697992 | -0.855284 |
| 11            | 8             | 0           | 3.665979                | 1.838824  | -0.801598 |
| 12            | 1             | 0           | 3.002229                | 2.397641  | -1.226285 |
| 13            | 6             | 0           | 0.809071                | 1.356277  | -1.222436 |
| 14            | 6             | 0           | 0.319946                | 2.276223  | -0.125915 |
| 15            | 1             | 0           | -0.022488               | 0.881668  | -1.752721 |
| 16            | 1             | 0           | 1.302965                | 1.945955  | -2.009021 |
| 17            | 6             | 0           | -0.929974               | 2.436728  | 0.334365  |
| 18            | 1             | 0           | 1.115211                | 2.845427  | 0.355880  |
| 19            | 6             | 0           | -2.142862               | 1.703609  | -0.197470 |
| 20            | 1             | 0           | -2.954744               | 2.427314  | -0.352661 |
| 21            | 1             | 0           | -1.949943               | 1.262106  | -1.180639 |
| 22            | 6             | 0           | -2.655285               | 0.591065  | 0.754623  |
| 23            | 6             | 0           | -3.914183               | -0.047394 | 0.234186  |
| 24            | 1             | 0           | -2.859587               | 1.036989  | 1.737307  |
| 25            | 1             | 0           | -1.857642               | -0.140617 | 0.910573  |
| 26            | 6             | 0           | -4.142346               | -1.335964 | -0.064362 |
| 27            | 1             | 0           | -4.734081               | 0.655745  | 0.074794  |
| 28            | 6             | 0           | -5.486507               | -1.780832 | -0.591657 |
| 29            | 1             | 0           | -5.381694               | -2.256944 | -1.575638 |
| 30            | 1             | 0           | -5.936103               | -2.534431 | 0.068490  |
| 31            | 1             | 0           | -6.189662               | -0.948681 | -0.688155 |
| 32            | 6             | 0           | -1.207072               | 3.393412  | 1.471204  |
| 33            | 1             | 0           | -1.933958               | 4.156991  | 1.166160  |
| 34            | 1             | 0           | -0.299337               | 3.899746  | 1.810431  |
| 35            | 1             | 0           | -1.644602               | 2.875168  | 2.332999  |
| 36            | 6             | 0           | -3.141017               | -2.454560 | 0.089511  |
| 37            | 1             | 0           | -3.520804               | -3.210234 | 0.789779  |
| 38            | 1             | 0           | -2.162366               | -2.127739 | 0.441238  |
| 39            | 1             | 0           | -2.996633               | -2.970372 | -0.868949 |
| 40            | 6             | 0           | 4.522039                | -2.594086 | 1.038063  |
| 41            | 1             | 0           | 5.543895                | -2.209298 | 1.087193  |
| 42            | 1             | 0           | 4.535076                | -3.517076 | 0.447843  |
| 43            | 1             | 0           | 4.214654                | -2.868496 | 2.053519  |

|                |         |          |          |
|----------------|---------|----------|----------|
| Frequencies -- | 20.8170 | 23.8482  | 38.0217  |
| Frequencies -- | 44.2363 | 52.6989  | 59.4846  |
| Frequencies -- | 93.2658 | 107.7240 | 124.2487 |

Zero-point correction= 0.372773 (Hartree/Particle)  
 Thermal correction to Energy= 0.394205  
 Thermal correction to Enthalpy= 0.395149  
 Thermal correction to Gibbs Free Energy= 0.320802  
 Sum of electronic and zero-point Energies= -812.399914  
 Sum of electronic and thermal Energies= -812.378482  
 Sum of electronic and thermal Enthalpies= -812.377537  
 Sum of electronic and thermal Free Energies= -812.451885



ss-1-3c4-5+.log

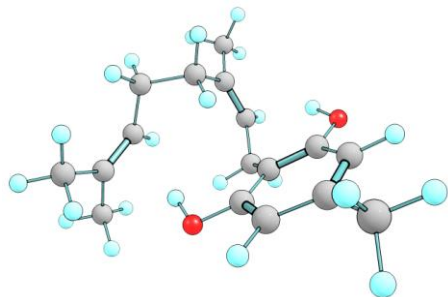

Standard orientation:

| Center Number | Atomic Number | Atomic Type | Coordinates (Angstroms) |           |           |
|---------------|---------------|-------------|-------------------------|-----------|-----------|
|               |               |             | X                       | Y         | Z         |
| 1             | 6             | 0           | -1.102052               | -1.136036 | 0.503917  |
| 2             | 6             | 0           | -2.200436               | -1.772656 | -0.076551 |
| 3             | 6             | 0           | -3.348307               | -1.046074 | -0.412471 |
| 4             | 6             | 0           | -3.362709               | 0.332341  | -0.185794 |
| 5             | 6             | 0           | -2.260215               | 0.962748  | 0.397806  |
| 6             | 6             | 0           | -1.118844               | 0.241912  | 0.791465  |
| 7             | 1             | 0           | -2.135139               | -2.838327 | -0.273060 |
| 8             | 1             | 0           | -4.219910               | 0.937768  | -0.462923 |
| 9             | 8             | 0           | -0.017033               | -1.924456 | 0.807844  |
| 10            | 1             | 0           | 0.804231                | -1.422301 | 0.660786  |
| 11            | 8             | 0           | -2.350041               | 2.314989  | 0.603917  |
| 12            | 1             | 0           | -1.449467               | 2.680907  | 0.650695  |
| 13            | 6             | 0           | -0.019389               | 0.931254  | 1.582271  |
| 14            | 6             | 0           | 0.628958                | 2.160915  | 0.960705  |
| 15            | 1             | 0           | 0.753942                | 0.204751  | 1.851841  |
| 16            | 1             | 0           | -0.455549               | 1.245566  | 2.538973  |
| 17            | 6             | 0           | 1.111678                | 2.314153  | -0.286410 |
| 18            | 1             | 0           | 0.750535                | 2.999565  | 1.646281  |
| 19            | 6             | 0           | 1.114721                | 1.227790  | -1.341884 |
| 20            | 1             | 0           | 0.317617                | 0.504748  | -1.160662 |
| 21            | 1             | 0           | 0.918996                | 1.681630  | -2.321486 |
| 22            | 6             | 0           | 2.465024                | 0.464282  | -1.427631 |
| 23            | 6             | 0           | 2.816737                | -0.270843 | -0.162283 |
| 24            | 1             | 0           | 3.265739                | 1.183010  | -1.648707 |
| 25            | 1             | 0           | 2.416748                | -0.214838 | -2.282914 |
| 26            | 6             | 0           | 2.939238                | -1.599081 | 0.024554  |
| 27            | 1             | 0           | 2.998498                | 0.374513  | 0.697095  |
| 28            | 6             | 0           | 3.317974                | -2.160225 | 1.376729  |
| 29            | 1             | 0           | 2.543814                | -2.846332 | 1.743506  |
| 30            | 1             | 0           | 4.244510                | -2.743751 | 1.307463  |
| 31            | 1             | 0           | 3.461258                | -1.374369 | 2.123452  |
| 32            | 6             | 0           | 1.754155                | 3.613592  | -0.707260 |
| 33            | 1             | 0           | 2.780907                | 3.446815  | -1.055507 |
| 34            | 1             | 0           | 1.785268                | 4.343311  | 0.106085  |
| 35            | 1             | 0           | 1.209609                | 4.057437  | -1.550169 |
| 36            | 6             | 0           | 2.708609                | -2.646363 | -1.037721 |
| 37            | 1             | 0           | 3.594208                | -3.284354 | -1.144407 |
| 38            | 1             | 0           | 2.470103                | -2.227750 | -2.016619 |
| 39            | 1             | 0           | 1.879391                | -3.299254 | -0.739634 |
| 40            | 6             | 0           | -4.528090               | -1.741444 | -1.050390 |
| 41            | 1             | 0           | -5.372246               | -1.059903 | -1.184009 |
| 42            | 1             | 0           | -4.866051               | -2.585974 | -0.439940 |
| 43            | 1             | 0           | -4.262729               | -2.144716 | -2.034537 |

Frequencies -- 30.1841 49.7727 64.0632  
 Frequencies -- 68.4741 74.6998 82.1699  
 Frequencies -- 95.6864 121.3005 148.0483

Zero-point correction= 0.373683 (Hartree/Particle)  
 Thermal correction to Energy= 0.394447  
 Thermal correction to Enthalpy= 0.395392  
 Thermal correction to Gibbs Free Energy= 0.324740  
 Sum of electronic and zero-point Energies= -812.405139  
 Sum of electronic and thermal Energies= -812.384374  
 Sum of electronic and thermal Enthalpies= -812.383430  
 Sum of electronic and thermal Free Energies= -812.454082

ss-1-3c4-5-.log

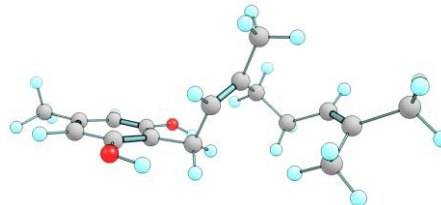

Standard orientation:

| Center Number | Atomic Number | Atomic Type | Coordinates (Angstroms) |           |           |
|---------------|---------------|-------------|-------------------------|-----------|-----------|
|               |               |             | X                       | Y         | Z         |
| 1             | 6             | 0           | 2.417715                | -1.041656 | -0.480253 |
| 2             | 6             | 0           | 3.772306                | -1.159922 | -0.158243 |
| 3             | 6             | 0           | 4.529541                | -0.025659 | 0.145488  |
| 4             | 6             | 0           | 3.914139                | 1.228398  | 0.103746  |
| 5             | 6             | 0           | 2.559429                | 1.336752  | -0.217306 |
| 6             | 6             | 0           | 1.774039                | 0.208255  | -0.517681 |
| 7             | 1             | 0           | 4.218280                | -2.149282 | -0.152848 |
| 8             | 1             | 0           | 4.470423                | 2.134379  | 0.322174  |
| 9             | 8             | 0           | 1.760541                | -2.218387 | -0.743484 |
| 10            | 1             | 0           | 0.918080                | -2.038447 | -1.180116 |
| 11            | 8             | 0           | 2.035309                | 2.604210  | -0.203678 |
| 12            | 1             | 0           | 1.136372                | 2.600483  | -0.557421 |
| 13            | 6             | 0           | 0.280469                | 0.345522  | -0.765758 |
| 14            | 6             | 0           | -0.485669               | 0.523502  | 0.527536  |
| 15            | 1             | 0           | -0.105074               | -0.505037 | -1.334164 |
| 16            | 1             | 0           | 0.086811                | 1.200725  | -1.430952 |
| 17            | 6             | 0           | -1.364795               | -0.327902 | 1.074517  |
| 18            | 1             | 0           | -0.251244               | 1.440461  | 1.067558  |
| 19            | 6             | 0           | -1.765830               | -1.645062 | 0.433035  |
| 20            | 1             | 0           | -0.883327               | -2.163327 | 0.041116  |
| 21            | 1             | 0           | -2.182016               | -2.306505 | 1.201925  |
| 22            | 6             | 0           | -2.807767               | -1.488218 | -0.705811 |
| 23            | 6             | 0           | -4.118849               | -0.920876 | -0.231216 |
| 24            | 1             | 0           | -2.982155               | -2.479906 | -1.143999 |
| 25            | 1             | 0           | -2.377542               | -0.869579 | -1.498532 |
| 26            | 6             | 0           | -4.582679               | 0.328463  | -0.392126 |
| 27            | 1             | 0           | -4.735313               | -1.616982 | 0.339757  |
| 28            | 6             | 0           | -5.920227               | 0.740739  | 0.174726  |
| 29            | 1             | 0           | -5.804629               | 1.573627  | 0.880875  |
| 30            | 1             | 0           | -6.589014               | 1.099867  | -0.618779 |
| 31            | 1             | 0           | -6.419080               | -0.081362 | 0.695866  |
| 32            | 6             | 0           | -2.042576               | -0.007522 | 2.383315  |
| 33            | 1             | 0           | -3.131229               | -0.006596 | 2.253471  |
| 34            | 1             | 0           | -1.739515               | 0.966042  | 2.779528  |
| 35            | 1             | 0           | -1.814801               | -0.772430 | 3.137153  |
| 36            | 6             | 0           | -3.851338               | 1.431044  | -1.117942 |
| 37            | 1             | 0           | -4.459299               | 1.818625  | -1.945817 |
| 38            | 1             | 0           | -2.883994               | 1.121559  | -1.515633 |
| 39            | 1             | 0           | -3.675465               | 2.275575  | -0.439475 |
| 40            | 6             | 0           | 5.983429                | -0.153660 | 0.534313  |
| 41            | 1             | 0           | 6.559070                | 0.722848  | 0.222627  |
| 42            | 1             | 0           | 6.440292                | -1.041838 | 0.088469  |
| 43            | 1             | 0           | 6.089544                | -0.242677 | 1.622464  |

Frequencies -- 17.5667 31.2623 37.4448  
 Frequencies -- 44.2690 54.3989 57.1635  
 Frequencies -- 83.5784 115.1340 134.1171

Zero-point correction= 0.372960 (Hartree/Particle)  
 Thermal correction to Energy= 0.394258  
 Thermal correction to Enthalpy= 0.395202  
 Thermal correction to Gibbs Free Energy= 0.321337  
 Sum of electronic and zero-point Energies= -812.397791  
 Sum of electronic and thermal Energies= -812.376493  
 Sum of electronic and thermal Enthalpies= -812.375549  
 Sum of electronic and thermal Free Energies= -812.449414

ss-1-3c4-5a.log

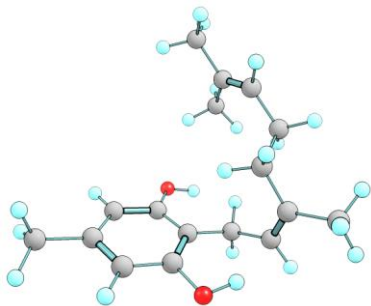

Standard orientation:

| Center Number | Atomic Number | Atomic Type | Coordinates (Angstroms) |           |           |
|---------------|---------------|-------------|-------------------------|-----------|-----------|
|               |               |             | X                       | Y         | Z         |
| 1             | 6             | 0           | -1.444251               | -0.972674 | 1.038167  |
| 2             | 6             | 0           | -2.370888               | -1.761533 | 0.352713  |
| 3             | 6             | 0           | -3.218218               | -1.188592 | -0.597894 |
| 4             | 6             | 0           | -3.115750               | 0.180946  | -0.847850 |
| 5             | 6             | 0           | -2.183188               | 0.967438  | -0.162907 |
| 6             | 6             | 0           | -1.314002               | 0.410951  | 0.800207  |
| 7             | 1             | 0           | -2.420690               | -2.820720 | 0.584425  |
| 8             | 1             | 0           | -3.753546               | 0.666437  | -1.579960 |
| 9             | 8             | 0           | -0.678321               | -1.636722 | 1.963873  |
| 10            | 1             | 0           | -0.099138               | -1.019186 | 2.428377  |
| 11            | 8             | 0           | -2.183402               | 2.298421  | -0.473525 |
| 12            | 1             | 0           | -1.340952               | 2.689252  | -0.175232 |
| 13            | 6             | 0           | -0.312680               | 1.233940  | 1.608922  |
| 14            | 6             | 0           | 0.283008                | 2.474702  | 0.959091  |
| 15            | 1             | 0           | 0.531586                | 0.586447  | 1.884515  |
| 16            | 1             | 0           | -0.776362               | 1.532159  | 2.557106  |
| 17            | 6             | 0           | 1.086116                | 2.484697  | -0.122114 |
| 18            | 1             | 0           | 0.077862                | 3.419788  | 1.460075  |
| 19            | 6             | 0           | 1.498978                | 1.213363  | -0.829119 |
| 20            | 1             | 0           | 0.743868                | 0.434536  | -0.696433 |
| 21            | 1             | 0           | 1.582605                | 1.393653  | -1.907836 |
| 22            | 6             | 0           | 2.856095                | 0.670885  | -0.300802 |
| 23            | 6             | 0           | 3.180242                | -0.667769 | -0.905546 |
| 24            | 1             | 0           | 2.807091                | 0.613818  | 0.790887  |
| 25            | 1             | 0           | 3.647222                | 1.393100  | -0.539223 |
| 26            | 6             | 0           | 3.055751                | -1.872961 | -0.327268 |
| 27            | 1             | 0           | 3.490109                | -0.636784 | -1.951055 |
| 28            | 6             | 0           | 3.343390                | -3.140033 | -1.095975 |
| 29            | 1             | 0           | 4.144531                | -3.717703 | -0.616291 |
| 30            | 1             | 0           | 2.460395                | -3.792900 | -1.112795 |
| 31            | 1             | 0           | 3.637690                | -2.938599 | -2.129935 |
| 32            | 6             | 0           | 1.673081                | 3.764674  | -0.656934 |
| 33            | 1             | 0           | 2.768690                | 3.709574  | -0.672498 |
| 34            | 1             | 0           | 1.382467                | 4.634715  | -0.062081 |
| 35            | 1             | 0           | 1.355514                | 3.930089  | -1.693828 |
| 36            | 6             | 0           | 2.604545                | -2.098162 | 1.095979  |
| 37            | 1             | 0           | 1.588676                | -2.511723 | 1.121549  |
| 38            | 1             | 0           | 2.601054                | -1.185597 | 1.696000  |
| 39            | 1             | 0           | 3.256388                | -2.824844 | 1.596201  |
| 40            | 6             | 0           | -4.196789               | -2.041381 | -1.369997 |
| 41            | 1             | 0           | -5.081826               | -1.468936 | -1.662928 |
| 42            | 1             | 0           | -4.523581               | -2.905439 | -0.784113 |
| 43            | 1             | 0           | -3.738508               | -2.425671 | -2.289741 |

Frequencies -- 22.6446 28.1930 44.2415  
 Frequencies -- 47.8939 57.8674 80.2251  
 Frequencies -- 83.8436 105.4740 122.1346

Zero-point correction= 0.372801 (Hartree/Particle)  
 Thermal correction to Energy= 0.394079  
 Thermal correction to Enthalpy= 0.395023  
 Thermal correction to Gibbs Free Energy= 0.321682  
 Sum of electronic and zero-point Energies= -812.401052  
 Sum of electronic and thermal Energies= -812.379774  
 Sum of electronic and thermal Enthalpies= -812.378830  
 Sum of electronic and thermal Free Energies= -812.452171

ss-1-3c4a5+.log

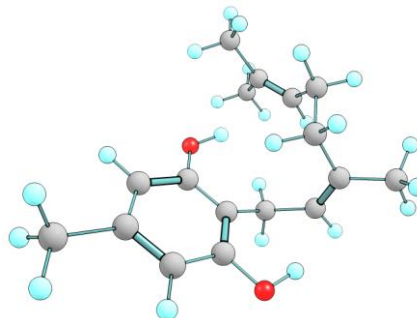

Standard orientation:

| Center Number | Atomic Number | Atomic Type | Coordinates (Angstroms) |           |           |
|---------------|---------------|-------------|-------------------------|-----------|-----------|
|               |               |             | X                       | Y         | Z         |
| 1             | 6             | 0           | -1.102078               | -1.136236 | 0.503764  |
| 2             | 6             | 0           | -2.200723               | -1.772761 | -0.076438 |
| 3             | 6             | 0           | -3.348540               | -1.046121 | -0.412152 |
| 4             | 6             | 0           | -3.362850               | 0.332340  | -0.185430 |
| 5             | 6             | 0           | -2.260221               | 0.962604  | 0.397936  |
| 6             | 6             | 0           | -1.118759               | 0.241688  | 0.791338  |
| 7             | 1             | 0           | -2.135606               | -2.838472 | -0.272816 |
| 8             | 1             | 0           | -4.220126               | 0.937771  | -0.462303 |
| 9             | 8             | 0           | -0.017172               | -1.924799 | 0.807441  |
| 10            | 1             | 0           | 0.804124                | -1.422476 | 0.661187  |
| 11            | 8             | 0           | -2.349854               | 2.314843  | 0.604297  |
| 12            | 1             | 0           | -1.449204               | 2.680617  | 0.650734  |
| 13            | 6             | 0           | -0.019301               | 0.930959  | 1.582213  |
| 14            | 6             | 0           | 0.628951                | 2.160703  | 0.960726  |
| 15            | 1             | 0           | 0.754015                | 0.204452  | 1.851792  |
| 16            | 1             | 0           | -0.455508               | 1.245270  | 2.538898  |
| 17            | 6             | 0           | 1.111578                | 2.314167  | -0.286391 |
| 18            | 1             | 0           | 0.750408                | 2.999331  | 1.646346  |
| 19            | 6             | 0           | 1.114925                | 1.227909  | -1.341982 |
| 20            | 1             | 0           | 0.317792                | 0.504825  | -1.161020 |
| 21            | 1             | 0           | 0.919454                | 1.681844  | -2.321586 |
| 22            | 6             | 0           | 2.465310                | 0.464466  | -1.427509 |
| 23            | 6             | 0           | 2.816903                | -0.270698 | -0.162175 |
| 24            | 1             | 0           | 3.265984                | 1.183261  | -1.648493 |
| 25            | 1             | 0           | 2.417138                | -0.214613 | -2.282836 |
| 26            | 6             | 0           | 2.939407                | -1.598945 | 0.024574  |
| 27            | 1             | 0           | 2.998534                | 0.374600  | 0.697265  |
| 28            | 6             | 0           | 3.318029                | -2.160183 | 1.376746  |
| 29            | 1             | 0           | 2.544164                | -2.846826 | 1.743133  |
| 30            | 1             | 0           | 4.244930                | -2.743146 | 1.307610  |
| 31            | 1             | 0           | 3.460656                | -1.374423 | 2.123695  |
| 32            | 6             | 0           | 1.753657                | 3.613814  | -0.707246 |
| 33            | 1             | 0           | 2.780143                | 3.447191  | -1.056335 |
| 34            | 1             | 0           | 1.785306                | 4.343286  | 0.106299  |
| 35            | 1             | 0           | 1.208424                | 4.057874  | -1.549597 |
| 36            | 6             | 0           | 2.708866                | -2.646136 | -1.037783 |
| 37            | 1             | 0           | 3.594274                | -3.284464 | -1.144111 |
| 38            | 1             | 0           | 2.470948                | -2.227462 | -2.016794 |
| 39            | 1             | 0           | 1.879312                | -3.298758 | -0.740034 |
| 40            | 6             | 0           | -4.528159               | -1.741094 | -1.050834 |
| 41            | 1             | 0           | -5.375807               | -1.062058 | -1.174780 |
| 42            | 1             | 0           | -4.859645               | -2.592503 | -0.446496 |
| 43            | 1             | 0           | -4.265477               | -2.134320 | -2.039791 |

Frequencies -- 30.1923 49.7701 64.0624  
 Frequencies -- 68.4666 74.6905 82.1404  
 Frequencies -- 95.6779 121.2921 148.0207

Zero-point correction= 0.373683 (Hartree/Particle)  
 Thermal correction to Energy= 0.394447  
 Thermal correction to Enthalpy= 0.395391  
 Thermal correction to Gibbs Free Energy= 0.324739  
 Sum of electronic and zero-point Energies= -812.405139  
 Sum of electronic and thermal Energies= -812.384374  
 Sum of electronic and thermal Enthalpies= -812.383430  
 Sum of electronic and thermal Free Energies= -812.454083

ss-1-3c4a5-.log

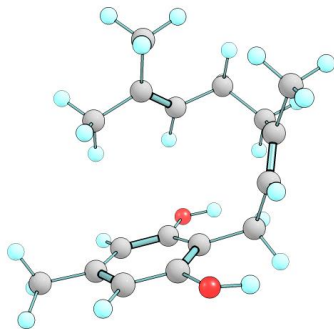

Standard orientation:

| Center Number | Atomic Number | Atomic Type | Coordinates (Angstroms) |           |           |
|---------------|---------------|-------------|-------------------------|-----------|-----------|
|               |               |             | X                       | Y         | Z         |
| 1             | 6             | 0           | 1.423324                | -0.277080 | 1.324986  |
| 2             | 6             | 0           | 2.460146                | 0.634744  | 1.103867  |
| 3             | 6             | 0           | 3.213248                | 0.581808  | -0.070100 |
| 4             | 6             | 0           | 2.932499                | -0.418681 | -1.004987 |
| 5             | 6             | 0           | 1.902714                | -1.330946 | -0.770511 |
| 6             | 6             | 0           | 1.103127                | -1.275094 | 0.387826  |
| 7             | 1             | 0           | 2.658345                | 1.384227  | 1.863397  |
| 8             | 1             | 0           | 3.509790                | -0.511252 | -1.919331 |
| 9             | 8             | 0           | 0.747113                | -0.117868 | 2.508351  |
| 10            | 1             | 0           | 0.059171                | -0.789518 | 2.595326  |
| 11            | 8             | 0           | 1.703817                | -2.278222 | -1.743833 |
| 12            | 1             | 0           | 1.144494                | -2.990979 | -1.409263 |
| 13            | 6             | 0           | -0.065659               | -2.236150 | 0.565035  |
| 14            | 6             | 0           | -1.195619               | -1.986167 | -0.414862 |
| 15            | 1             | 0           | -0.438180               | -2.215393 | 1.592964  |
| 16            | 1             | 0           | 0.289765                | -3.270694 | 0.443897  |
| 17            | 6             | 0           | -2.372559               | -1.380078 | -0.198992 |
| 18            | 1             | 0           | -0.997444               | -2.331199 | -1.428794 |
| 19            | 6             | 0           | -2.815187               | -0.788916 | 1.120530  |
| 20            | 1             | 0           | -3.771375               | -1.242648 | 1.415283  |
| 21            | 1             | 0           | -2.105365               | -1.026817 | 1.918367  |
| 22            | 6             | 0           | -3.003280               | 0.753144  | 1.072757  |
| 23            | 6             | 0           | -1.728481               | 1.464999  | 0.711056  |
| 24            | 1             | 0           | -3.336574               | 1.073570  | 2.069345  |
| 25            | 1             | 0           | -3.816052               | 0.999926  | 0.384452  |
| 26            | 6             | 0           | -1.466357               | 2.212116  | -0.372453 |
| 27            | 1             | 0           | -0.912862               | 1.297252  | 1.413098  |
| 28            | 6             | 0           | -0.088285               | 2.787617  | -0.599794 |
| 29            | 1             | 0           | 0.326385                | 2.430428  | -1.552269 |
| 30            | 1             | 0           | -0.122295               | 3.883193  | -0.668441 |
| 31            | 1             | 0           | 0.611001                | 2.507028  | 0.191621  |
| 32            | 6             | 0           | -3.362540               | -1.230901 | -1.331145 |
| 33            | 1             | 0           | -4.348835               | -1.614876 | -1.041016 |
| 34            | 1             | 0           | -3.037572               | -1.763736 | -2.228775 |
| 35            | 1             | 0           | -3.502695               | -0.178230 | -1.600538 |
| 36            | 6             | 0           | -2.460888               | 2.545729  | -1.457464 |
| 37            | 1             | 0           | -2.511146               | 3.631504  | -1.610453 |
| 38            | 1             | 0           | -3.471729               | 2.192171  | -1.246232 |
| 39            | 1             | 0           | -2.143886               | 2.112939  | -2.415441 |
| 40            | 6             | 0           | 4.291400                | 1.603865  | -0.339087 |
| 41            | 1             | 0           | 5.101853                | 1.182346  | -0.941001 |
| 42            | 1             | 0           | 4.717801                | 1.990785  | 0.590863  |
| 43            | 1             | 0           | 3.884350                | 2.458636  | -0.893182 |

|                |          |          |          |
|----------------|----------|----------|----------|
| Frequencies -- | 22.6947  | 25.8353  | 39.9485  |
| Frequencies -- | 59.9999  | 68.2866  | 78.0273  |
| Frequencies -- | 106.7296 | 134.6768 | 140.1766 |

|                                              |                             |
|----------------------------------------------|-----------------------------|
| Zero-point correction=                       | 0.373264 (Hartree/Particle) |
| Thermal correction to Energy=                | 0.394368                    |
| Thermal correction to Enthalpy=              | 0.395313                    |
| Thermal correction to Gibbs Free Energy=     | 0.323002                    |
| Sum of electronic and zero-point Energies=   | -812.400969                 |
| Sum of electronic and thermal Energies=      | -812.379865                 |
| Sum of electronic and thermal Enthalpies=    | -812.378921                 |
| Sum of electronic and thermal Free Energies= | -812.451232                 |

ss-1-3c4a5a.log

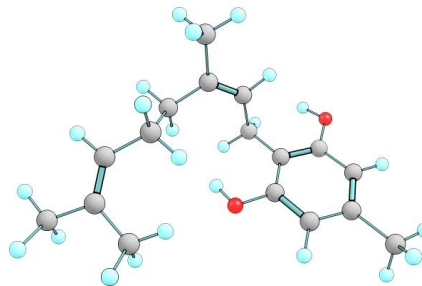

Standard orientation:

| Center Number | Atomic Number | Atomic Type | Coordinates (Angstroms) |           |           |
|---------------|---------------|-------------|-------------------------|-----------|-----------|
|               |               |             | X                       | Y         | Z         |
| 1             | 6             | 0           | 1.345529                | -0.966656 | -0.285604 |
| 2             | 6             | 0           | 2.225132                | -1.901885 | 0.260111  |
| 3             | 6             | 0           | 3.574632                | -1.580728 | 0.440365  |
| 4             | 6             | 0           | 4.023420                | -0.314768 | 0.061078  |
| 5             | 6             | 0           | 3.133631                | 0.615815  | -0.485054 |
| 6             | 6             | 0           | 1.775603                | 0.312797  | -0.685564 |
| 7             | 1             | 0           | 1.837804                | -2.875748 | 0.542432  |
| 8             | 1             | 0           | 5.061902                | -0.026163 | 0.186667  |
| 9             | 8             | 0           | 0.040381                | -1.372362 | -0.406803 |
| 10            | 1             | 0           | -0.484784               | -0.698323 | -0.856184 |
| 11            | 8             | 0           | 3.665592                | 1.839019  | -0.800641 |
| 12            | 1             | 0           | 3.002171                | 2.397453  | -1.226343 |
| 13            | 6             | 0           | 0.809067                | 1.356176  | -1.222686 |
| 14            | 6             | 0           | 0.320166                | 2.276323  | -0.126229 |
| 15            | 1             | 0           | -0.022629               | 0.881675  | -1.752837 |
| 16            | 1             | 0           | 1.302993                | 1.945672  | -2.009393 |
| 17            | 6             | 0           | -0.929696               | 2.436942  | 0.334154  |
| 18            | 1             | 0           | 1.115509                | 2.845566  | 0.355381  |
| 19            | 6             | 0           | -2.142667               | 1.703760  | -0.197426 |
| 20            | 1             | 0           | -2.954748               | 2.427356  | -0.352059 |
| 21            | 1             | 0           | -1.950066               | 1.262577  | -1.180801 |
| 22            | 6             | 0           | -2.654481               | 0.590837  | 0.754551  |
| 23            | 6             | 0           | -3.913807               | -0.047320 | 0.234766  |
| 24            | 1             | 0           | -2.858037               | 1.036349  | 1.737579  |
| 25            | 1             | 0           | -1.856787               | -0.140974 | 0.909633  |
| 26            | 6             | 0           | -4.142371               | -1.335790 | -0.063907 |
| 27            | 1             | 0           | -4.733693               | 0.655983  | 0.076042  |
| 28            | 6             | 0           | -5.486926               | -1.780322 | -0.590471 |
| 29            | 1             | 0           | -5.382813               | -2.256202 | -1.574637 |
| 30            | 1             | 0           | -5.936214               | -2.534019 | 0.069774  |
| 31            | 1             | 0           | -6.190021               | -0.948044 | -0.686313 |
| 32            | 6             | 0           | -1.206683               | 3.393883  | 1.470800  |
| 33            | 1             | 0           | -1.933223               | 4.157686  | 1.165488  |
| 34            | 1             | 0           | -0.298842               | 3.899937  | 1.810161  |
| 35            | 1             | 0           | -1.644607               | 2.875915  | 2.332559  |
| 36            | 6             | 0           | -3.141133               | -2.454583 | 0.089114  |
| 37            | 1             | 0           | -3.520505               | -3.210228 | 0.789638  |
| 38            | 1             | 0           | -2.162150               | -2.127963 | 0.440106  |
| 39            | 1             | 0           | -2.997593               | -2.970367 | -0.869487 |
| 40            | 6             | 0           | 4.521640                | -2.594009 | 1.038750  |
| 41            | 1             | 0           | 5.544593                | -2.211480 | 1.082392  |
| 42            | 1             | 0           | 4.530130                | -3.519632 | 0.452633  |
| 43            | 1             | 0           | 4.217495                | -2.863119 | 2.056622  |

|                |         |          |          |
|----------------|---------|----------|----------|
| Frequencies -- | 20.9647 | 23.9840  | 41.8089  |
| Frequencies -- | 44.6317 | 53.0046  | 59.5329  |
| Frequencies -- | 93.2743 | 107.7085 | 124.2463 |

|                                              |                             |
|----------------------------------------------|-----------------------------|
| Zero-point correction=                       | 0.372784 (Hartree/Particle) |
| Thermal correction to Energy=                | 0.394206                    |
| Thermal correction to Enthalpy=              | 0.395150                    |
| Thermal correction to Gibbs Free Energy=     | 0.320919                    |
| Sum of electronic and zero-point Energies=   | -812.399902                 |
| Sum of electronic and thermal Energies=      | -812.378480                 |
| Sum of electronic and thermal Enthalpies=    | -812.377536                 |
| Sum of electronic and thermal Free Energies= | -812.451767                 |

# Cannabigerocin-aa-1a3c

b-aa-1a3c4+5+.log

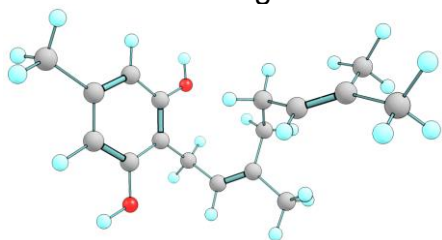

Standard orientation:

| Center Number | Atomic Number | Atomic Type | Coordinates (Angstroms) |           |           |
|---------------|---------------|-------------|-------------------------|-----------|-----------|
|               |               |             | X                       | Y         | Z         |
| 1             | 6             | 0           | -2.651588               | -0.750480 | 0.728953  |
| 2             | 6             | 0           | -3.306873               | 0.405057  | 1.165034  |
| 3             | 6             | 0           | -3.240636               | 1.578427  | 0.406674  |
| 4             | 6             | 0           | -2.516088               | 1.568673  | -0.787891 |
| 5             | 6             | 0           | -1.869864               | 0.401698  | -1.214853 |
| 6             | 6             | 0           | -1.911622               | -0.781412 | -0.463175 |
| 7             | 1             | 0           | -3.864698               | 0.387557  | 2.098372  |
| 8             | 1             | 0           | -2.452773               | 2.468512  | -1.395351 |
| 9             | 8             | 0           | -2.692906               | -1.917203 | 1.446505  |
| 10            | 1             | 0           | -3.231432               | -1.785409 | 2.238853  |
| 11            | 8             | 0           | -1.160686               | 0.372739  | -2.388830 |
| 12            | 1             | 0           | -1.157866               | 1.256616  | -2.780375 |
| 13            | 6             | 0           | -1.177529               | -2.040294 | -0.887893 |
| 14            | 6             | 0           | -0.007408               | -2.398352 | 0.009978  |
| 15            | 1             | 0           | -0.846804               | -1.918484 | -1.921417 |
| 16            | 1             | 0           | -1.886379               | -2.876156 | -0.874869 |
| 17            | 6             | 0           | 1.252757                | -1.944397 | -0.084853 |
| 18            | 1             | 0           | -0.243811               | -3.084729 | 0.820902  |
| 19            | 6             | 0           | 1.699520                | -0.933475 | -1.120930 |
| 20            | 1             | 0           | 2.729006                | -1.156565 | -1.429430 |
| 21            | 1             | 0           | 1.069850                | -0.996438 | -2.013106 |
| 22            | 6             | 0           | 1.648112                | 0.544370  | -0.634950 |
| 23            | 6             | 0           | 2.558158                | 0.869526  | 0.523424  |
| 24            | 1             | 0           | 0.616260                | 0.771722  | -0.353162 |
| 25            | 1             | 0           | 1.879736                | 1.181083  | -1.496706 |
| 26            | 6             | 0           | 3.847001                | 1.240431  | 0.461712  |
| 27            | 1             | 0           | 2.113464                | 0.766095  | 1.513398  |
| 28            | 6             | 0           | 4.645437                | 1.518217  | 1.712105  |
| 29            | 1             | 0           | 5.517106                | 0.853189  | 1.776213  |
| 30            | 1             | 0           | 5.039718                | 2.543282  | 1.707890  |
| 31            | 1             | 0           | 4.048910                | 1.385498  | 2.619322  |
| 32            | 6             | 0           | 2.320307                | -2.429829 | 0.868095  |
| 33            | 1             | 0           | 3.121496                | -2.941832 | 0.318041  |
| 34            | 1             | 0           | 1.920972                | -3.124266 | 1.613445  |
| 35            | 1             | 0           | 2.796481                | -1.593069 | 1.390821  |
| 36            | 6             | 0           | 4.619330                | 1.401563  | -0.824463 |
| 37            | 1             | 0           | 5.043524                | 2.411438  | -0.899329 |
| 38            | 1             | 0           | 4.015597                | 1.218197  | -1.715413 |
| 39            | 1             | 0           | 5.469644                | 0.707397  | -0.848328 |
| 40            | 6             | 0           | -3.969961               | 2.823266  | 0.853811  |
| 41            | 1             | 0           | -3.477633               | 3.728588  | 0.487052  |
| 42            | 1             | 0           | -4.027526               | 2.882441  | 1.944684  |
| 43            | 1             | 0           | -4.998428               | 2.833114  | 0.472433  |

Frequencies -- 17.5299 33.5680 36.8641  
 Frequencies -- 45.4124 56.3702 73.2879  
 Frequencies -- 78.5951 106.2842 130.0438

Zero-point correction= 0.373159 (Hartree/Particle)  
 Thermal correction to Energy= 0.394484  
 Thermal correction to Enthalpy= 0.395428  
 Thermal correction to Gibbs Free Energy= 0.321630  
 Sum of electronic and zero-point Energies= -812.399753  
 Sum of electronic and thermal Energies= -812.378429  
 Sum of electronic and thermal Enthalpies= -812.377484  
 Sum of electronic and thermal Free Energies= -812.451283

# b-aa-1a3c4+5-.log

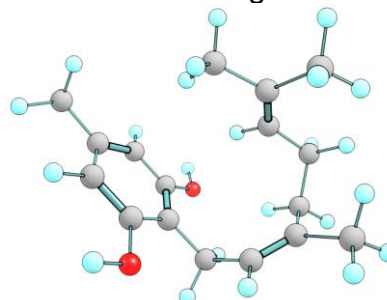

Standard orientation:

| Center Number | Atomic Number | Atomic Type | Coordinates (Angstroms) |           |           |
|---------------|---------------|-------------|-------------------------|-----------|-----------|
|               |               |             | X                       | Y         | Z         |
| 1             | 6             | 0           | 1.732740                | -1.222821 | -0.969021 |
| 2             | 6             | 0           | 2.774568                | -0.295899 | -1.074185 |
| 3             | 6             | 0           | 3.118738                | 0.500150  | 0.022588  |
| 4             | 6             | 0           | 2.414337                | 0.340190  | 1.218609  |
| 5             | 6             | 0           | 1.371003                | -0.589535 | 1.306032  |
| 6             | 6             | 0           | 0.999585                | -1.388401 | 0.216392  |
| 7             | 1             | 0           | 3.313532                | -0.195938 | -2.013345 |
| 8             | 1             | 0           | 2.670293                | 0.942258  | 2.087181  |
| 9             | 8             | 0           | 1.373311                | -2.024642 | -2.020429 |
| 10            | 1             | 0           | 1.939167                | -1.828777 | -2.779735 |
| 11            | 8             | 0           | 0.660827                | -0.748147 | 2.470300  |
| 12            | 1             | 0           | 0.988689                | -0.123526 | 3.131493  |
| 13            | 6             | 0           | -0.147773               | -2.380193 | 0.290288  |
| 14            | 6             | 0           | -1.338848               | -1.990024 | -0.564596 |
| 15            | 1             | 0           | -0.439056               | -2.504790 | 1.334029  |
| 16            | 1             | 0           | 0.215106                | -3.354701 | -0.058111 |
| 17            | 6             | 0           | -2.418566               | -1.283374 | -0.196654 |
| 18            | 1             | 0           | -1.273379               | -2.314638 | -1.601442 |
| 19            | 6             | 0           | -2.638554               | -0.719963 | 1.190749  |
| 20            | 1             | 0           | -3.575198               | -1.128023 | 1.598305  |
| 21            | 1             | 0           | -1.832958               | -1.021784 | 1.864542  |
| 22            | 6             | 0           | -2.739142               | 0.830236  | 1.226236  |
| 23            | 6             | 0           | -1.465757               | 1.487352  | 0.770645  |
| 24            | 1             | 0           | -2.947164               | 1.120538  | 2.265777  |
| 25            | 1             | 0           | -3.600436               | 1.161952  | 0.639535  |
| 26            | 6             | 0           | -1.263204               | 2.288117  | -0.286611 |
| 27            | 1             | 0           | -0.597551               | 1.224071  | 1.372299  |
| 28            | 6             | 0           | 0.120844                | 2.797664  | -0.614267 |
| 29            | 1             | 0           | 0.422481                | 2.479626  | -1.621535 |
| 30            | 1             | 0           | 0.149628                | 3.895710  | -0.615133 |
| 31            | 1             | 0           | 0.870465                | 2.427846  | 0.089938  |
| 32            | 6             | 0           | -3.516075               | -0.995244 | -1.195477 |
| 33            | 1             | 0           | -4.495066               | -1.298189 | -0.801191 |
| 34            | 1             | 0           | -3.351875               | -1.518500 | -2.141689 |
| 35            | 1             | 0           | -3.587689               | 0.076224  | -1.415669 |
| 36            | 6             | 0           | -2.334967               | 2.748009  | -1.244320 |
| 37            | 1             | 0           | -2.336418               | 3.843091  | -1.322165 |
| 38            | 1             | 0           | -3.339792               | 2.432911  | -0.957125 |
| 39            | 1             | 0           | -2.136810               | 2.367144  | -2.255003 |
| 40            | 6             | 0           | 4.202504                | 1.544613  | -0.097213 |
| 41            | 1             | 0           | 4.687856                | 1.731470  | 0.865097  |
| 42            | 1             | 0           | 3.784488                | 2.498046  | -0.443328 |
| 43            | 1             | 0           | 4.969990                | 1.245026  | -0.816856 |

Frequencies -- 28.7095 36.4418 42.6487  
 Frequencies -- 67.3777 70.8291 79.3333  
 Frequencies -- 96.9463 126.5120 141.1476

Zero-point correction= 0.373542 (Hartree/Particle)  
 Thermal correction to Energy= 0.394571  
 Thermal correction to Enthalpy= 0.395516  
 Thermal correction to Gibbs Free Energy= 0.323959  
 Sum of electronic and zero-point Energies= -812.405014  
 Sum of electronic and thermal Energies= -812.383985  
 Sum of electronic and thermal Enthalpies= -812.383041  
 Sum of electronic and thermal Free Energies= -812.454598

b-aa-1a3c4+5a.log

b-aa-1a3c4-5+.log

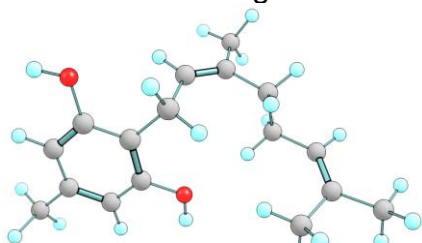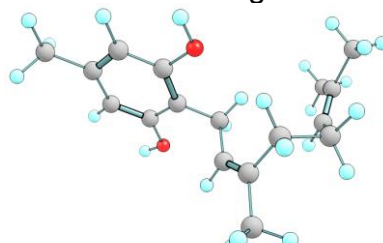

Standard orientation:

Standard orientation:

| Center Number | Atomic Number | Atomic Type | Coordinates (Angstroms) |           |           |
|---------------|---------------|-------------|-------------------------|-----------|-----------|
|               |               |             | X                       | Y         | Z         |
| 1             | 6             | 0           | 3.030749                | 0.661927  | -0.652861 |
| 2             | 6             | 0           | 4.094442                | -0.080037 | -0.129304 |
| 3             | 6             | 0           | 3.856569                | -1.318022 | 0.475873  |
| 4             | 6             | 0           | 2.543633                | -1.791009 | 0.550967  |
| 5             | 6             | 0           | 1.490280                | -1.036005 | 0.022816  |
| 6             | 6             | 0           | 1.705741                | 0.201108  | -0.600623 |
| 7             | 1             | 0           | 5.106636                | 0.312425  | -0.191850 |
| 8             | 1             | 0           | 2.333787                | -2.747378 | 1.023831  |
| 9             | 8             | 0           | 3.226320                | 1.884603  | -1.241166 |
| 10            | 1             | 0           | 4.169829                | 2.096492  | -1.231880 |
| 11            | 8             | 0           | 0.193906                | -1.479317 | 0.092169  |
| 12            | 1             | 0           | 0.166175                | -2.335644 | 0.540203  |
| 13            | 6             | 0           | 0.567410                | 1.038920  | -1.150729 |
| 14            | 6             | 0           | 0.146583                | 2.111824  | -0.170540 |
| 15            | 1             | 0           | -0.269215               | 0.387651  | -1.407344 |
| 16            | 1             | 0           | 0.909854                | 1.514348  | -2.078846 |
| 17            | 6             | 0           | -1.086743               | 2.364218  | 0.292289  |
| 18            | 1             | 0           | 0.969187                | 2.728444  | 0.191420  |
| 19            | 6             | 0           | -2.322985               | 1.586249  | -0.109786 |
| 20            | 1             | 0           | -3.180143               | 2.271598  | -0.151524 |
| 21            | 1             | 0           | -2.221651               | 1.161804  | -1.113402 |
| 22            | 6             | 0           | -2.654870               | 0.431672  | 0.872655  |
| 23            | 6             | 0           | -3.981044               | -0.211901 | 0.562851  |
| 24            | 1             | 0           | -2.683247               | 0.834336  | 1.893635  |
| 25            | 1             | 0           | -1.832728               | -0.287814 | 0.841862  |
| 26            | 6             | 0           | -4.204841               | -1.331932 | -0.142387 |
| 27            | 1             | 0           | -4.852769               | 0.333330  | 0.928836  |
| 28            | 6             | 0           | -5.608177               | -1.833873 | -0.386162 |
| 29            | 1             | 0           | -5.820957               | -1.897692 | -1.461684 |
| 30            | 1             | 0           | -5.736211               | -2.849184 | 0.012924  |
| 31            | 1             | 0           | -6.363562               | -1.189833 | 0.073458  |
| 32            | 6             | 0           | -1.325591               | 3.462675  | 1.302064  |
| 33            | 1             | 0           | -1.996434               | 4.230511  | 0.894374  |
| 34            | 1             | 0           | -0.395626               | 3.949397  | 1.609865  |
| 35            | 1             | 0           | -1.816872               | 3.071799  | 2.202664  |
| 36            | 6             | 0           | -3.121727               | -2.187307 | -0.753590 |
| 37            | 1             | 0           | -3.147247               | -3.202003 | -0.333282 |
| 38            | 1             | 0           | -2.117735               | -1.784971 | -0.614113 |
| 39            | 1             | 0           | -3.293573               | -2.300078 | -1.832197 |
| 40            | 6             | 0           | 5.002901                | -2.143489 | 1.010398  |
| 41            | 1             | 0           | 4.678869                | -2.799666 | 1.823339  |
| 42            | 1             | 0           | 5.812263                | -1.509218 | 1.383878  |
| 43            | 1             | 0           | 5.425577                | -2.781054 | 0.224220  |

| Center Number | Atomic Number | Atomic Type | Coordinates (Angstroms) |           |           |
|---------------|---------------|-------------|-------------------------|-----------|-----------|
|               |               |             | X                       | Y         | Z         |
| 1             | 6             | 0           | -2.488327               | 0.294945  | 1.195546  |
| 2             | 6             | 0           | -3.817103               | 0.056131  | 0.835526  |
| 3             | 6             | 0           | -4.112727               | -0.599893 | -0.365254 |
| 4             | 6             | 0           | -3.060689               | -1.006546 | -1.188481 |
| 5             | 6             | 0           | -1.733095               | -0.759605 | -0.813364 |
| 6             | 6             | 0           | -1.414272               | -0.111977 | 0.387248  |
| 7             | 1             | 0           | -4.620691               | 0.385117  | 1.490304  |
| 8             | 1             | 0           | -3.266844               | -1.515823 | -2.126857 |
| 9             | 8             | 0           | -2.160870               | 0.940943  | 2.359987  |
| 10            | 1             | 0           | -2.970438               | 1.161165  | 2.840978  |
| 11            | 8             | 0           | -0.684795               | -1.149839 | -1.607324 |
| 12            | 1             | 0           | -1.028252               | -1.589857 | -2.396704 |
| 13            | 6             | 0           | 0.020704                | 0.175923  | 0.783560  |
| 14            | 6             | 0           | 0.419042                | 1.603556  | 0.479805  |
| 15            | 1             | 0           | 0.688763                | -0.529789 | 0.290511  |
| 16            | 1             | 0           | 0.123865                | 0.010423  | 1.862804  |
| 17            | 6             | 0           | 1.285932                | 2.029647  | -0.451297 |
| 18            | 1             | 0           | -0.085310               | 2.348677  | 1.094818  |
| 19            | 6             | 0           | 2.041222                | 1.113223  | -1.394717 |
| 20            | 1             | 0           | 1.481216                | 0.190767  | -1.569975 |
| 21            | 1             | 0           | 2.134809                | 1.615117  | -2.367234 |
| 22            | 6             | 0           | 3.468988                | 0.748350  | -0.902505 |
| 23            | 6             | 0           | 3.453337                | -0.052457 | 0.371137  |
| 24            | 1             | 0           | 4.035785                | 1.675450  | -0.740119 |
| 25            | 1             | 0           | 3.983485                | 0.211280  | -1.705287 |
| 26            | 6             | 0           | 3.693911                | -1.363442 | 0.529778  |
| 27            | 1             | 0           | 3.156702                | 0.512189  | 1.254667  |
| 28            | 6             | 0           | 3.576676                | -2.014611 | 1.887421  |
| 29            | 1             | 0           | 2.821525                | -2.811893 | 1.872845  |
| 30            | 1             | 0           | 4.522123                | -2.489969 | 2.181075  |
| 31            | 1             | 0           | 3.298302                | -1.297675 | 2.665159  |
| 32            | 6             | 0           | 1.588837                | 3.501071  | -0.612566 |
| 33            | 1             | 0           | 2.664643                | 3.695894  | -0.512729 |
| 34            | 1             | 0           | 1.065428                | 4.114200  | 0.126794  |
| 35            | 1             | 0           | 1.304580                | 3.852582  | -1.613435 |
| 36            | 6             | 0           | 4.078179                | -2.311174 | -0.579848 |
| 37            | 1             | 0           | 5.039198                | -2.794600 | -0.360417 |
| 38            | 1             | 0           | 4.157450                | -1.828767 | -1.555664 |
| 39            | 1             | 0           | 3.339032                | -3.118690 | -0.663539 |
| 40            | 6             | 0           | -5.549322               | -0.860597 | -0.752891 |
| 41            | 1             | 0           | -5.621167               | -1.343717 | -1.730802 |
| 42            | 1             | 0           | -6.122854               | 0.072092  | -0.793153 |
| 43            | 1             | 0           | -6.043779               | -1.508255 | -0.019930 |

Frequencies -- 17.0119      27.6452      44.6116  
 Frequencies -- 47.5104      58.5809      60.8764  
 Frequencies -- 75.3379      103.4950      127.1853

Frequencies -- 16.0108      21.9752      32.5897  
 Frequencies -- 39.3313      51.9472      55.8540  
 Frequencies -- 66.4534      106.8026      125.6573

Zero-point correction= 0.373059 (Hartree/Particle)  
 Thermal correction to Energy= 0.394438  
 Thermal correction to Enthalpy= 0.395382  
 Thermal correction to Gibbs Free Energy= 0.321238  
 Sum of electronic and zero-point Energies= -812.402964  
 Sum of electronic and thermal Energies= -812.381585  
 Sum of electronic and thermal Enthalpies= -812.380641  
 Sum of electronic and thermal Free Energies= -812.454786

Zero-point correction= 0.372878 (Hartree/Particle)  
 Thermal correction to Energy= 0.394358  
 Thermal correction to Enthalpy= 0.395302  
 Thermal correction to Gibbs Free Energy= 0.320112  
 Sum of electronic and zero-point Energies= -812.401802  
 Sum of electronic and thermal Energies= -812.380322  
 Sum of electronic and thermal Enthalpies= -812.379378  
 Sum of electronic and thermal Free Energies= -812.454568

b-aa-1a3c4-5-.log

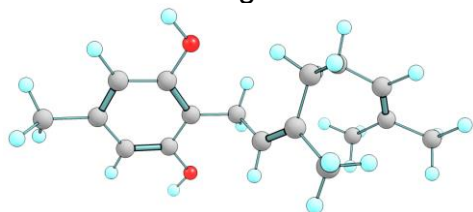

Standard orientation:

| Center Number | Atomic Number | Atomic Type | Coordinates (Angstroms) |           |           |
|---------------|---------------|-------------|-------------------------|-----------|-----------|
|               |               |             | X                       | Y         | Z         |
| 1             | 6             | 0           | 2.589555                | 1.343012  | -0.185934 |
| 2             | 6             | 0           | 3.956027                | 1.216050  | 0.085665  |
| 3             | 6             | 0           | 4.552901                | -0.048319 | 0.107691  |
| 4             | 6             | 0           | 3.763796                | -1.172899 | -0.151195 |
| 5             | 6             | 0           | 2.398025                | -1.029492 | -0.421526 |
| 6             | 6             | 0           | 1.780389                | 0.229203  | -0.455487 |
| 7             | 1             | 0           | 4.550572                | 2.104955  | 0.282721  |
| 8             | 1             | 0           | 4.207885                | -2.165492 | -0.141810 |
| 9             | 8             | 0           | 1.968886                | 2.565418  | -0.205830 |
| 10            | 1             | 0           | 2.618833                | 3.256529  | -0.018341 |
| 11            | 8             | 0           | 1.602865                | -2.117286 | -0.677372 |
| 12            | 1             | 0           | 2.138044                | -2.921454 | -0.635806 |
| 13            | 6             | 0           | 0.296133                | 0.382950  | -0.726121 |
| 14            | 6             | 0           | -0.495403               | 0.511549  | 0.556409  |
| 15            | 1             | 0           | -0.049509               | -0.463580 | -1.320624 |
| 16            | 1             | 0           | 0.142799                | 1.286441  | -1.328381 |
| 17            | 6             | 0           | -1.391260               | -0.358223 | 1.045945  |
| 18            | 1             | 0           | -0.274343               | 1.410670  | 1.131189  |
| 19            | 6             | 0           | -1.777183               | -1.643021 | 0.333271  |
| 20            | 1             | 0           | -0.887304               | -2.119047 | -0.091533 |
| 21            | 1             | 0           | -2.193881               | -2.349277 | 1.062411  |
| 22            | 6             | 0           | -2.815234               | -1.430103 | -0.800969 |
| 23            | 6             | 0           | -4.140811               | -0.909116 | -0.313263 |
| 24            | 1             | 0           | -2.974127               | -2.395452 | -1.300775 |
| 25            | 1             | 0           | -2.382503               | -0.760963 | -1.550293 |
| 26            | 6             | 0           | -4.614907               | 0.344105  | -0.394657 |
| 27            | 1             | 0           | -4.761915               | -1.648951 | 0.194819  |
| 28            | 6             | 0           | -5.968226               | 0.703575  | 0.170859  |
| 29            | 1             | 0           | -5.875285               | 1.477730  | 0.944221  |
| 30            | 1             | 0           | -6.621088               | 1.121807  | -0.606957 |
| 31            | 1             | 0           | -6.473723               | -0.160040 | 0.612579  |
| 32            | 6             | 0           | -2.100858               | -0.091892 | 2.351069  |
| 33            | 1             | 0           | -3.186765               | -0.081825 | 2.199264  |
| 34            | 1             | 0           | -1.804433               | 0.863554  | 2.794566  |
| 35            | 1             | 0           | -1.892688               | -0.887436 | 3.079248  |
| 36            | 6             | 0           | -3.878973               | 1.501139  | -1.025092 |
| 37            | 1             | 0           | -4.458910               | 1.923160  | -1.856575 |
| 38            | 1             | 0           | -2.887459               | 1.233930  | -1.392671 |
| 39            | 1             | 0           | -3.751818               | 2.309806  | -0.293908 |
| 40            | 6             | 0           | 6.018766                | -0.199023 | 0.439801  |
| 41            | 1             | 0           | 6.165926                | -0.309675 | 1.521166  |
| 42            | 1             | 0           | 6.592694                | 0.676196  | 0.121500  |
| 43            | 1             | 0           | 6.448575                | -1.083604 | -0.039194 |

Frequencies -- 15.1760 19.1004 34.6814  
 Frequencies -- 41.8599 50.3521 60.3542  
 Frequencies -- 80.6909 112.2697 128.4631

Zero-point correction= 0.372990 (Hartree/Particle)  
 Thermal correction to Energy= 0.394355  
 Thermal correction to Enthalpy= 0.395299  
 Thermal correction to Gibbs Free Energy= 0.320566  
 Sum of electronic and zero-point Energies= -812.401883  
 Sum of electronic and thermal Energies= -812.380518  
 Sum of electronic and thermal Enthalpies= -812.379574  
 Sum of electronic and thermal Free Energies= -812.454307

b-aa-1a3c4-5a.log

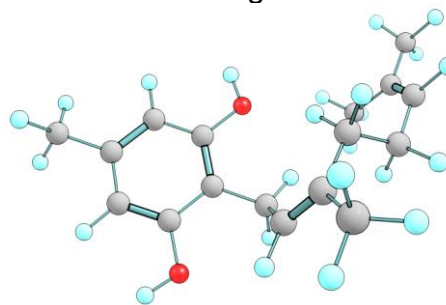

Standard orientation:

| Center Number | Atomic Number | Atomic Type | Coordinates (Angstroms) |           |           |
|---------------|---------------|-------------|-------------------------|-----------|-----------|
|               |               |             | X                       | Y         | Z         |
| 1             | 6             | 0           | -2.860517               | 0.644763  | 0.754037  |
| 2             | 6             | 0           | -3.998603               | 0.001121  | 0.258569  |
| 3             | 6             | 0           | -3.873170               | -1.191844 | -0.460634 |
| 4             | 6             | 0           | -2.598064               | -1.726622 | -0.662985 |
| 5             | 6             | 0           | -1.467954               | -1.070926 | -0.159501 |
| 6             | 6             | 0           | -1.569976               | 0.128215  | 0.560065  |
| 7             | 1             | 0           | -4.980859               | 0.433418  | 0.433770  |
| 8             | 1             | 0           | -2.477576               | -2.656079 | -1.214424 |
| 9             | 8             | 0           | -2.944754               | 1.815872  | 1.461803  |
| 10            | 1             | 0           | -3.873204               | 2.074142  | 1.542600  |
| 11            | 8             | 0           | -0.208404               | -1.584322 | -0.344475 |
| 12            | 1             | 0           | -0.266446               | -2.402827 | -0.855556 |
| 13            | 6             | 0           | -0.350876               | 0.859624  | 1.091212  |
| 14            | 6             | 0           | -0.000370               | 2.085838  | 0.272914  |
| 15            | 1             | 0           | 0.489327                | 0.166497  | 1.135578  |
| 16            | 1             | 0           | -0.560296               | 1.179250  | 2.119182  |
| 17            | 6             | 0           | 1.010131                | 2.201020  | -0.601932 |
| 18            | 1             | 0           | -0.664044               | 2.936434  | 0.421685  |
| 19            | 6             | 0           | 1.977973                | 1.072875  | -0.897598 |
| 20            | 1             | 0           | 1.477387                | 0.104746  | -0.819477 |
| 21            | 1             | 0           | 2.334054                | 1.158353  | -1.932518 |
| 22            | 6             | 0           | 3.208183                | 1.063788  | 0.048485  |
| 23            | 6             | 0           | 4.121432                | -0.100536 | -0.237481 |
| 24            | 1             | 0           | 2.845232                | 1.038041  | 1.081621  |
| 25            | 1             | 0           | 3.756957                | 2.007150  | -0.062261 |
| 26            | 6             | 0           | 4.034249                | -1.331536 | 0.291540  |
| 27            | 1             | 0           | 4.878717                | 0.070371  | -1.003508 |
| 28            | 6             | 0           | 4.959165                | -2.441732 | -0.144644 |
| 29            | 1             | 0           | 5.538510                | -2.828479 | 0.704321  |
| 30            | 1             | 0           | 4.387722                | -3.292448 | -0.539858 |
| 31            | 1             | 0           | 5.661102                | -2.115470 | -0.917644 |
| 32            | 6             | 0           | 1.271546                | 3.494434  | -1.334879 |
| 33            | 1             | 0           | 2.295488                | 3.846847  | -1.152652 |
| 34            | 1             | 0           | 0.581489                | 4.288203  | -1.034010 |
| 35            | 1             | 0           | 1.182886                | 3.355063  | -2.420506 |
| 36            | 6             | 0           | 3.007016                | -1.735735 | 1.322698  |
| 37            | 1             | 0           | 2.205182                | -2.324677 | 0.859351  |
| 38            | 1             | 0           | 2.535328                | -0.881492 | 1.812759  |
| 39            | 1             | 0           | 3.460072                | -2.364721 | 2.098501  |
| 40            | 6             | 0           | -5.093358               | -1.871238 | -1.035974 |
| 41            | 1             | 0           | -4.929352               | -2.944442 | -1.168492 |
| 42            | 1             | 0           | -5.346090               | -1.454556 | -2.018669 |
| 43            | 1             | 0           | -5.967163               | -1.734777 | -0.391767 |

Frequencies -- 14.9499 21.5263 41.3450  
 Frequencies -- 49.3413 55.4876 57.7551  
 Frequencies -- 70.4805 98.0272 121.8467

Zero-point correction= 0.372798 (Hartree/Particle)  
 Thermal correction to Energy= 0.394338  
 Thermal correction to Enthalpy= 0.395282  
 Thermal correction to Gibbs Free Energy= 0.320221  
 Sum of electronic and zero-point Energies= -812.401835  
 Sum of electronic and thermal Energies= -812.380295  
 Sum of electronic and thermal Enthalpies= -812.379351  
 Sum of electronic and thermal Free Energies= -812.454412

b-aa-1a3c4a5+.log

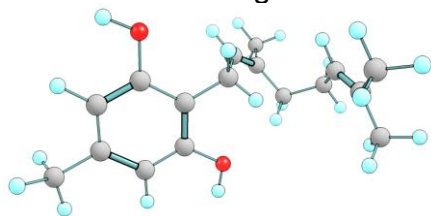

Standard orientation:

| Center Number | Atomic Number | Atomic Type | Coordinates (Angstroms) |           |           |
|---------------|---------------|-------------|-------------------------|-----------|-----------|
|               |               |             | X                       | Y         | Z         |
| 1             | 6             | 0           | -2.488285               | 0.294877  | 1.195597  |
| 2             | 6             | 0           | -3.817070               | 0.056140  | 0.835576  |
| 3             | 6             | 0           | -4.112731               | -0.599786 | -0.365255 |
| 4             | 6             | 0           | -3.060720               | -1.006421 | -1.188518 |
| 5             | 6             | 0           | -1.733110               | -0.759555 | -0.813396 |
| 6             | 6             | 0           | -1.414247               | -0.112035 | 0.387262  |
| 7             | 1             | 0           | -4.620644               | 0.385111  | 1.490378  |
| 8             | 1             | 0           | -3.266903               | -1.515607 | -2.126936 |
| 9             | 8             | 0           | -2.160781               | 0.940793  | 2.360068  |
| 10            | 1             | 0           | -2.970331               | 1.160877  | 2.841151  |
| 11            | 8             | 0           | -0.684839               | -1.149766 | -1.607407 |
| 12            | 1             | 0           | -1.028335               | -1.589533 | -2.396910 |
| 13            | 6             | 0           | 0.020743                | 0.175809  | 0.783588  |
| 14            | 6             | 0           | 0.419098                | 1.603448  | 0.479872  |
| 15            | 1             | 0           | 0.688782                | -0.529893 | 0.290501  |
| 16            | 1             | 0           | 0.123896                | 0.010273  | 1.862825  |
| 17            | 6             | 0           | 1.285965                | 2.029568  | -0.451236 |
| 18            | 1             | 0           | -0.085256               | 2.348551  | 1.094907  |
| 19            | 6             | 0           | 2.041274                | 1.113187  | -1.394681 |
| 20            | 1             | 0           | 1.481317                | 0.190700  | -1.569912 |
| 21            | 1             | 0           | 2.134831                | 1.615089  | -2.367196 |
| 22            | 6             | 0           | 3.469074                | 0.748406  | -0.902487 |
| 23            | 6             | 0           | 3.453507                | -0.052393 | 0.371158  |
| 24            | 1             | 0           | 4.035798                | 1.675549  | -0.740118 |
| 25            | 1             | 0           | 3.983572                | 0.211358  | -1.705283 |
| 26            | 6             | 0           | 3.693923                | -1.363414 | 0.529738  |
| 27            | 1             | 0           | 3.157076                | 0.512280  | 1.254739  |
| 28            | 6             | 0           | 3.576772                | -2.014612 | 1.887381  |
| 29            | 1             | 0           | 2.821595                | -2.811871 | 1.872856  |
| 30            | 1             | 0           | 4.522234                | -2.489995 | 2.180937  |
| 31            | 1             | 0           | 3.298484                | -1.297677 | 2.665150  |
| 32            | 6             | 0           | 1.588785                | 3.501012  | -0.612551 |
| 33            | 1             | 0           | 2.664607                | 3.695875  | -0.513011 |
| 34            | 1             | 0           | 1.065547                | 4.114112  | 0.126954  |
| 35            | 1             | 0           | 1.304226                | 3.852515  | -1.613339 |
| 36            | 6             | 0           | 4.077759                | -2.311198 | -0.579996 |
| 37            | 1             | 0           | 5.038341                | -2.795415 | -0.360420 |
| 38            | 1             | 0           | 4.157647                | -1.828629 | -1.555684 |
| 39            | 1             | 0           | 3.337991                | -3.118110 | -0.664055 |
| 40            | 6             | 0           | -5.549344               | -0.860435 | -0.752880 |
| 41            | 1             | 0           | -5.621227               | -1.343246 | -1.730941 |
| 42            | 1             | 0           | -6.122922               | 0.072239  | -0.792800 |
| 43            | 1             | 0           | -6.043715               | -1.508359 | -0.020096 |

Frequencies -- 16.0252            21.9780            32.5826  
 Frequencies -- 39.6579            51.9569            55.8859  
 Frequencies -- 66.4497            106.8036            125.6576

Zero-point correction=            0.372879 (Hartree/Particle)  
 Thermal correction to Energy=    0.394358  
 Thermal correction to Enthalpy= 0.395302  
 Thermal correction to Gibbs Free Energy= 0.320121  
 Sum of electronic and zero-point Energies= -812.401801  
 Sum of electronic and thermal Energies= -812.380322  
 Sum of electronic and thermal Enthalpies= -812.379378  
 Sum of electronic and thermal Free Energies= -812.454559

b-aa-1a3c4a5-.log

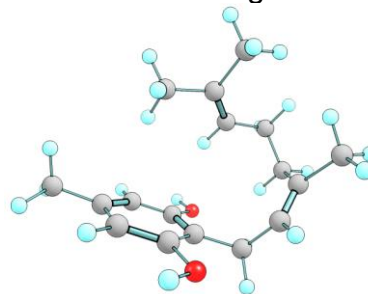

Standard orientation:

| Center Number | Atomic Number | Atomic Type | Coordinates (Angstroms) |           |           |
|---------------|---------------|-------------|-------------------------|-----------|-----------|
|               |               |             | X                       | Y         | Z         |
| 1             | 6             | 0           | 1.732670                | -1.222740 | -0.969125 |
| 2             | 6             | 0           | 2.774523                | -0.295822 | -1.074203 |
| 3             | 6             | 0           | 3.118712                | 0.500096  | 0.022644  |
| 4             | 6             | 0           | 2.414311                | 0.340033  | 1.218668  |
| 5             | 6             | 0           | 1.370966                | -0.589677 | 1.306002  |
| 6             | 6             | 0           | 0.999548                | -1.388451 | 0.216281  |
| 7             | 1             | 0           | 3.313455                | -0.195749 | -2.013371 |
| 8             | 1             | 0           | 2.670313                | 0.942005  | 2.087291  |
| 9             | 8             | 0           | 1.373192                | -2.024415 | -2.020620 |
| 10            | 1             | 0           | 1.939011                | -1.828457 | -2.779924 |
| 11            | 8             | 0           | 0.660733                | -0.748373 | 2.470225  |
| 12            | 1             | 0           | 0.988518                | -0.123759 | 3.131460  |
| 13            | 6             | 0           | -0.147786               | -2.380279 | 0.290112  |
| 14            | 6             | 0           | -1.338922               | -1.990062 | -0.564677 |
| 15            | 1             | 0           | -0.439019               | -2.505019 | 1.333849  |
| 16            | 1             | 0           | 0.215120                | -3.354720 | -0.058437 |
| 17            | 6             | 0           | -2.418583               | -1.283378 | -0.196637 |
| 18            | 1             | 0           | -1.273549               | -2.314660 | -1.601537 |
| 19            | 6             | 0           | -2.638443               | -0.719967 | 1.190793  |
| 20            | 1             | 0           | -3.575058               | -1.128012 | 1.598433  |
| 21            | 1             | 0           | -1.832781               | -1.021768 | 1.864507  |
| 22            | 6             | 0           | -2.739018               | 0.830226  | 1.226264  |
| 23            | 6             | 0           | -1.465635               | 1.487306  | 0.770623  |
| 24            | 1             | 0           | -2.947020               | 1.120561  | 2.265800  |
| 25            | 1             | 0           | -3.600313               | 1.161940  | 0.639560  |
| 26            | 6             | 0           | -1.263115               | 2.288162  | -0.286570 |
| 27            | 1             | 0           | -0.597406               | 1.223955  | 1.372214  |
| 28            | 6             | 0           | 0.120936                | 2.797727  | -0.614215 |
| 29            | 1             | 0           | 0.422508                | 2.479851  | -1.621555 |
| 30            | 1             | 0           | 0.149743                | 3.895773  | -0.614903 |
| 31            | 1             | 0           | 0.870577                | 2.427785  | 0.089909  |
| 32            | 6             | 0           | -3.516131               | -0.995105 | -1.195379 |
| 33            | 1             | 0           | -4.495146               | -1.297818 | -0.800982 |
| 34            | 1             | 0           | -3.352126               | -1.518455 | -2.141574 |
| 35            | 1             | 0           | -3.587535               | 0.076365  | -1.415627 |
| 36            | 6             | 0           | -2.334920               | 2.748160  | -1.244169 |
| 37            | 1             | 0           | -2.336396               | 3.843255  | -1.321858 |
| 38            | 1             | 0           | -3.339725               | 2.433003  | -0.956961 |
| 39            | 1             | 0           | -2.136802               | 2.367445  | -2.254916 |
| 40            | 6             | 0           | 4.202523                | 1.544525  | -0.097029 |
| 41            | 1             | 0           | 4.686909                | 1.732287  | 0.865586  |
| 42            | 1             | 0           | 3.784762                | 2.497601  | -0.444432 |
| 43            | 1             | 0           | 4.970741                | 1.244366  | -0.815662 |

Frequencies -- 28.7025            36.4567            42.6549  
 Frequencies -- 67.4411            70.8945            79.3509  
 Frequencies -- 96.9457            126.5157            141.1566

Zero-point correction=            0.373543 (Hartree/Particle)  
 Thermal correction to Energy=    0.394572  
 Thermal correction to Enthalpy= 0.395516  
 Thermal correction to Gibbs Free Energy= 0.323962  
 Sum of electronic and zero-point Energies= -812.405014  
 Sum of electronic and thermal Energies= -812.383985  
 Sum of electronic and thermal Enthalpies= -812.383041  
 Sum of electronic and thermal Free Energies= -812.454595

b-aa-1a3c4a5a.log

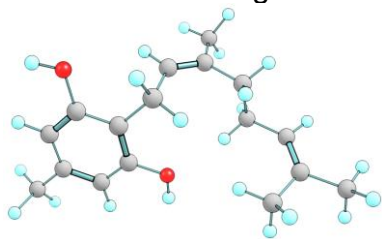

Standard orientation:

| Center Number | Atomic Number | Atomic Type | Coordinates (Angstroms) |           |           |
|---------------|---------------|-------------|-------------------------|-----------|-----------|
|               |               |             | X                       | Y         | Z         |
| 1             | 6             | 0           | 3.030844                | 0.661881  | -0.652898 |
| 2             | 6             | 0           | 4.094401                | -0.080165 | -0.129182 |
| 3             | 6             | 0           | 3.856356                | -1.318168 | 0.475917  |
| 4             | 6             | 0           | 2.543389                | -1.791108 | 0.550745  |
| 5             | 6             | 0           | 1.490160                | -1.036001 | 0.022471  |
| 6             | 6             | 0           | 1.705790                | 0.201137  | -0.600875 |
| 7             | 1             | 0           | 5.106636                | 0.312221  | -0.191620 |
| 8             | 1             | 0           | 2.333403                | -2.747515 | 1.023475  |
| 9             | 8             | 0           | 3.226590                | 1.884550  | -1.241151 |
| 10            | 1             | 0           | 4.170091                | 2.096457  | -1.231559 |
| 11            | 8             | 0           | 0.193746                | -1.479250 | 0.091663  |
| 12            | 1             | 0           | 0.165913                | -2.335562 | 0.539715  |
| 13            | 6             | 0           | 0.567559                | 1.039097  | -1.150979 |
| 14            | 6             | 0           | 0.146700                | 2.111827  | -0.170590 |
| 15            | 1             | 0           | -0.269078               | 0.387934  | -1.407824 |
| 16            | 1             | 0           | 0.910128                | 1.514746  | -2.078926 |
| 17            | 6             | 0           | -1.086618               | 2.364113  | 0.292317  |
| 18            | 1             | 0           | 0.969296                | 2.728402  | 0.191475  |
| 19            | 6             | 0           | -2.322860               | 1.586151  | -0.109764 |
| 20            | 1             | 0           | -3.179958               | 2.271557  | -0.151755 |
| 21            | 1             | 0           | -2.221399               | 1.161450  | -1.113255 |
| 22            | 6             | 0           | -2.654958               | 0.431793  | 0.872887  |
| 23            | 6             | 0           | -3.981125               | -0.211776 | 0.562986  |
| 24            | 1             | 0           | -2.683485               | 0.834640  | 1.893783  |
| 25            | 1             | 0           | -1.832856               | -0.287745 | 0.842316  |
| 26            | 6             | 0           | -4.204807               | -1.331793 | -0.142300 |
| 27            | 1             | 0           | -4.852880               | 0.333439  | 0.928915  |
| 28            | 6             | 0           | -5.608114               | -1.833761 | -0.386330 |
| 29            | 1             | 0           | -5.820830               | -1.897133 | -1.461892 |
| 30            | 1             | 0           | -5.736070               | -2.849240 | 0.012336  |
| 31            | 1             | 0           | -6.363563               | -1.189959 | 0.073519  |
| 32            | 6             | 0           | -1.325445               | 3.462431  | 1.302285  |
| 33            | 1             | 0           | -1.996429               | 4.230224  | 0.894759  |
| 34            | 1             | 0           | -0.395480               | 3.949221  | 1.609983  |
| 35            | 1             | 0           | -1.816527               | 3.071396  | 2.202918  |
| 36            | 6             | 0           | -3.121610               | -2.187132 | -0.753428 |
| 37            | 1             | 0           | -3.146957               | -3.201729 | -0.332878 |
| 38            | 1             | 0           | -2.117667               | -1.784604 | -0.614124 |
| 39            | 1             | 0           | -3.293545               | -2.300146 | -1.831992 |
| 40            | 6             | 0           | 5.002532                | -2.143586 | 1.010911  |
| 41            | 1             | 0           | 4.678286                | -2.799265 | 1.824173  |
| 42            | 1             | 0           | 5.811895                | -1.509213 | 1.384208  |
| 43            | 1             | 0           | 5.425211                | -2.781606 | 0.225123  |

Frequencies -- 17.0596 27.6230 44.6080  
 Frequencies -- 47.5187 58.4138 60.8439  
 Frequencies -- 75.3415 103.5018 127.1725

Zero-point correction= 0.373058 (Hartree/Particle)  
 Thermal correction to Energy= 0.394437  
 Thermal correction to Enthalpy= 0.395381  
 Thermal correction to Gibbs Free Energy= 0.321235  
 Sum of electronic and zero-point Energies= -812.402966  
 Sum of electronic and thermal Energies= -812.381586  
 Sum of electronic and thermal Enthalpies= -812.380642  
 Sum of electronic and thermal Free Energies= -812.454789

Cannabigerocin-aa-1+3c

b-aa-1+3c4+5+.log

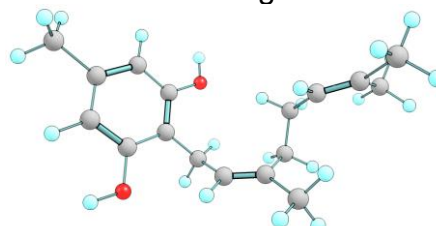

Standard orientation:

| Center Number | Atomic Number | Atomic Type | Coordinates (Angstroms) |           |           |
|---------------|---------------|-------------|-------------------------|-----------|-----------|
|               |               |             | X                       | Y         | Z         |
| 1             | 6             | 0           | 3.027609                | 0.955521  | 0.231950  |
| 2             | 6             | 0           | 4.007470                | 0.078729  | 0.707934  |
| 3             | 6             | 0           | 3.935383                | -1.284754 | 0.406295  |
| 4             | 6             | 0           | 2.877874                | -1.745267 | -0.382443 |
| 5             | 6             | 0           | 1.905488                | -0.854517 | -0.852810 |
| 6             | 6             | 0           | 1.953402                | 0.515686  | -0.557947 |
| 7             | 1             | 0           | 4.824905                | 0.462656  | 1.313796  |
| 8             | 1             | 0           | 2.806522                | -2.799918 | -0.637513 |
| 9             | 8             | 0           | 3.068110                | 2.297640  | 0.509071  |
| 10            | 1             | 0           | 3.845580                | 2.487813  | 1.051733  |
| 11            | 8             | 0           | 0.869477                | -1.287492 | -1.640338 |
| 12            | 1             | 0           | 0.929349                | -2.245978 | -1.752580 |
| 13            | 6             | 0           | 0.894283                | 1.490964  | -1.038135 |
| 14            | 6             | 0           | -0.044754               | 1.898049  | 0.076779  |
| 15            | 1             | 0           | 0.351288                | 1.051597  | -1.875354 |
| 16            | 1             | 0           | 1.402932                | 2.389256  | -1.413635 |
| 17            | 6             | 0           | -1.384433               | 1.831922  | 0.088316  |
| 18            | 1             | 0           | 0.459928                | 2.293150  | 0.957583  |
| 19            | 6             | 0           | -2.217274               | 1.298379  | -1.064220 |
| 20            | 1             | 0           | -3.211289               | 1.761032  | -1.028998 |
| 21            | 1             | 0           | -1.774496               | 1.584750  | -2.024775 |
| 22            | 6             | 0           | -2.395500               | -0.245471 | -1.058689 |
| 23            | 6             | 0           | -2.981106               | -0.789953 | 0.217628  |
| 24            | 1             | 0           | -1.410482               | -0.697695 | -1.215594 |
| 25            | 1             | 0           | -3.011849               | -0.518094 | -1.922396 |
| 26            | 6             | 0           | -4.252132               | -1.149597 | 0.457933  |
| 27            | 1             | 0           | -2.273799               | -0.872846 | 1.043506  |
| 28            | 6             | 0           | -4.674430               | -1.666718 | 1.812446  |
| 29            | 1             | 0           | -5.457899               | -1.031798 | 2.247313  |
| 30            | 1             | 0           | -5.103747               | -2.674474 | 1.732703  |
| 31            | 1             | 0           | -3.838579               | -1.706855 | 2.516899  |
| 32            | 6             | 0           | -2.169764               | 2.299005  | 1.292052  |
| 33            | 1             | 0           | -2.821574               | 3.142279  | 1.026629  |
| 34            | 1             | 0           | -1.518340               | 2.616401  | 2.111870  |
| 35            | 1             | 0           | -2.829186               | 1.503995  | 1.659809  |
| 36            | 6             | 0           | -5.369080               | -1.075530 | -0.554304 |
| 37            | 1             | 0           | -5.822978               | -2.064053 | -0.704107 |
| 38            | 1             | 0           | -5.048178               | -0.698355 | -1.527059 |
| 39            | 1             | 0           | -6.170982               | -0.420894 | -0.188659 |
| 40            | 6             | 0           | 4.965945                | -2.246792 | 0.948420  |
| 41            | 1             | 0           | 5.089781                | -3.112297 | 0.291095  |
| 42            | 1             | 0           | 4.668117                | -2.625030 | 1.934051  |
| 43            | 1             | 0           | 5.940375                | -1.763753 | 1.066598  |

Frequencies -- 7.9814 20.1348 35.6910  
 Frequencies -- 40.5196 45.5850 71.7371  
 Frequencies -- 82.3710 98.1719 132.5435

Zero-point correction= 0.372822 (Hartree/Particle)  
 Thermal correction to Energy= 0.394299  
 Thermal correction to Enthalpy= 0.395243  
 Thermal correction to Gibbs Free Energy= 0.319640  
 Sum of electronic and zero-point Energies= -812.400653  
 Sum of electronic and thermal Energies= -812.379176  
 Sum of electronic and thermal Enthalpies= -812.378232  
 Sum of electronic and thermal Free Energies= -812.453835



b-aa-1+3c4+5-.log

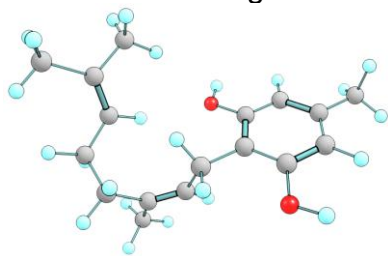

Standard orientation:

| Center Number | Atomic Number | Atomic Type | Coordinates (Angstroms) |           |           |
|---------------|---------------|-------------|-------------------------|-----------|-----------|
|               |               |             | X                       | Y         | Z         |
| 1             | 6             | 0           | -2.671801               | 0.802118  | 0.975262  |
| 2             | 6             | 0           | -3.922318               | 0.269944  | 0.636758  |
| 3             | 6             | 0           | -4.021170               | -0.759210 | -0.302844 |
| 4             | 6             | 0           | -2.852565               | -1.240431 | -0.901716 |
| 5             | 6             | 0           | -1.611568               | -0.699225 | -0.553230 |
| 6             | 6             | 0           | -1.485090               | 0.325675  | 0.397717  |
| 7             | 1             | 0           | -4.818675               | 0.666060  | 1.107972  |
| 8             | 1             | 0           | -2.904451               | -2.034221 | -1.643085 |
| 9             | 8             | 0           | -2.555824               | 1.818917  | 1.887339  |
| 10            | 1             | 0           | -3.432797               | 2.038357  | 2.230483  |
| 11            | 8             | 0           | -0.449737               | -1.143429 | -1.130997 |
| 12            | 1             | 0           | -0.652217               | -1.848948 | -1.760483 |
| 13            | 6             | 0           | -0.131164               | 0.902590  | 0.745987  |
| 14            | 6             | 0           | 0.415642                | 1.814901  | -0.338772 |
| 15            | 1             | 0           | 0.570542                | 0.081361  | 0.921529  |
| 16            | 1             | 0           | -0.216280               | 1.452691  | 1.689692  |
| 17            | 6             | 0           | 1.694487                | 2.184415  | -0.499505 |
| 18            | 1             | 0           | -0.324293               | 2.196245  | -1.042292 |
| 19            | 6             | 0           | 2.816756                | 1.741329  | 0.418428  |
| 20            | 1             | 0           | 3.470829                | 2.602893  | 0.609206  |
| 21            | 1             | 0           | 2.425743                | 1.424820  | 1.390599  |
| 22            | 6             | 0           | 3.688217                | 0.593441  | -0.161161 |
| 23            | 6             | 0           | 2.925161                | -0.697818 | -0.279217 |
| 24            | 1             | 0           | 4.575372                | 0.479617  | 0.468680  |
| 25            | 1             | 0           | 4.053236                | 0.898959  | -1.152465 |
| 26            | 6             | 0           | 3.216517                | -1.888104 | 0.270768  |
| 27            | 1             | 0           | 2.006935                | -0.625478 | -0.860161 |
| 28            | 6             | 0           | 2.299008                | -3.073737 | 0.077517  |
| 29            | 1             | 0           | 2.804801                | -3.880280 | -0.470839 |
| 30            | 1             | 0           | 2.005387                | -3.499247 | 1.046703  |
| 31            | 1             | 0           | 1.388615                | -2.800423 | -0.461299 |
| 32            | 6             | 0           | 2.109101                | 3.089081  | -1.635907 |
| 33            | 1             | 0           | 2.548114                | 4.021347  | -1.256474 |
| 34            | 1             | 0           | 1.265948                | 3.347244  | -2.283106 |
| 35            | 1             | 0           | 2.879507                | 2.617350  | -2.259444 |
| 36            | 6             | 0           | 4.438054                | -2.184039 | 1.106639  |
| 37            | 1             | 0           | 4.145171                | -2.534675 | 2.105075  |
| 38            | 1             | 0           | 5.100175                | -1.325403 | 1.231769  |
| 39            | 1             | 0           | 5.022926                | -2.996364 | 0.655144  |
| 40            | 6             | 0           | -5.362303               | -1.364051 | -0.644779 |
| 41            | 1             | 0           | -5.397387               | -1.694229 | -1.687277 |
| 42            | 1             | 0           | -6.176130               | -0.651377 | -0.483379 |
| 43            | 1             | 0           | -5.566359               | -2.241482 | -0.018956 |

Frequencies -- 21.5606      38.8250      42.8070  
 Frequencies -- 45.6046      49.9985      69.3290  
 Frequencies -- 91.2376      119.3700      145.2982

Zero-point correction= 0.372781 (Hartree/Particle)  
 Thermal correction to Energy= 0.394159  
 Thermal correction to Enthalpy= 0.395103  
 Thermal correction to Gibbs Free Energy= 0.321580  
 Sum of electronic and zero-point Energies= -812.401455  
 Sum of electronic and thermal Energies= -812.380077  
 Sum of electronic and thermal Enthalpies= -812.379132  
 Sum of electronic and thermal Free Energies= -812.452655

b-aa-1+3c4+5a.log

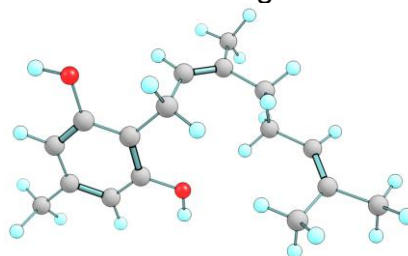

Standard orientation:

| Center Number | Atomic Number | Atomic Type | Coordinates (Angstroms) |           |           |
|---------------|---------------|-------------|-------------------------|-----------|-----------|
|               |               |             | X                       | Y         | Z         |
| 1             | 6             | 0           | 3.030758                | 0.661739  | -0.653820 |
| 2             | 6             | 0           | 4.094655                | -0.080055 | -0.130401 |
| 3             | 6             | 0           | 3.856944                | -1.317544 | 0.475849  |
| 4             | 6             | 0           | 2.543955                | -1.790201 | 0.552209  |
| 5             | 6             | 0           | 1.490409                | -1.035379 | 0.024186  |
| 6             | 6             | 0           | 1.705699                | 0.201208  | -0.600380 |
| 7             | 1             | 0           | 5.106885                | 0.312179  | -0.193905 |
| 8             | 1             | 0           | 2.334238                | -2.746165 | 1.025955  |
| 9             | 8             | 0           | 3.226201                | 1.883994  | -1.243034 |
| 10            | 1             | 0           | 4.169766                | 2.095671  | -1.234504 |
| 11            | 8             | 0           | 0.193975                | -1.478316 | 0.094787  |
| 12            | 1             | 0           | 0.166419                | -2.334521 | 0.543068  |
| 13            | 6             | 0           | 0.567092                | 1.038724  | -1.150362 |
| 14            | 6             | 0           | 0.146112                | 2.111592  | -0.170182 |
| 15            | 1             | 0           | -0.269419               | 0.387229  | -1.406793 |
| 16            | 1             | 0           | 0.909271                | 1.514181  | -2.078554 |
| 17            | 6             | 0           | -1.087261               | 2.363847  | 0.292618  |
| 18            | 1             | 0           | 0.968623                | 2.728309  | 0.191846  |
| 19            | 6             | 0           | -2.323415               | 1.585768  | -0.109502 |
| 20            | 1             | 0           | -3.180522               | 2.271150  | -0.151829 |
| 21            | 1             | 0           | -2.221769               | 1.160864  | -1.112889 |
| 22            | 6             | 0           | -2.655731               | 0.431607  | 0.873300  |
| 23            | 6             | 0           | -3.981544               | -0.212437 | 0.562829  |
| 24            | 1             | 0           | -2.684918               | 0.834732  | 1.894065  |
| 25            | 1             | 0           | -1.833404               | -0.287702 | 0.843392  |
| 26            | 6             | 0           | -4.204535               | -1.332214 | -0.143065 |
| 27            | 1             | 0           | -4.853657               | 0.332227  | 0.928732  |
| 28            | 6             | 0           | -5.607545               | -1.834646 | -0.387759 |
| 29            | 1             | 0           | -5.819723               | -1.898200 | -1.463418 |
| 30            | 1             | 0           | -5.735365               | -2.850135 | 0.010939  |
| 31            | 1             | 0           | -6.363432               | -1.191055 | 0.071670  |
| 32            | 6             | 0           | -1.326223               | 3.462215  | 1.302479  |
| 33            | 1             | 0           | -1.997321               | 4.229898  | 0.894925  |
| 34            | 1             | 0           | -0.396322               | 3.949150  | 1.610146  |
| 35            | 1             | 0           | -1.817247               | 3.071182  | 2.203153  |
| 36            | 6             | 0           | -3.120784               | -2.186709 | -0.754387 |
| 37            | 1             | 0           | -3.146413               | -3.201849 | -0.335167 |
| 38            | 1             | 0           | -2.116961               | -1.784325 | -0.613771 |
| 39            | 1             | 0           | -3.291830               | -2.298367 | -1.833242 |
| 40            | 6             | 0           | 5.003550                | -2.142853 | 1.010063  |
| 41            | 1             | 0           | 4.679936                | -2.798766 | 1.823374  |
| 42            | 1             | 0           | 5.813108                | -1.508446 | 1.382891  |
| 43            | 1             | 0           | 5.425842                | -2.780647 | 0.223855  |

Frequencies -- 16.7987      27.6087      44.5120  
 Frequencies -- 47.4371      58.6351      60.8994  
 Frequencies -- 75.2694      103.4805      127.0931

Zero-point correction= 0.373056 (Hartree/Particle)  
 Thermal correction to Energy= 0.394435  
 Thermal correction to Enthalpy= 0.395380  
 Thermal correction to Gibbs Free Energy= 0.321219  
 Sum of electronic and zero-point Energies= -812.402968  
 Sum of electronic and thermal Energies= -812.381588  
 Sum of electronic and thermal Enthalpies= -812.380644  
 Sum of electronic and thermal Free Energies= -812.454804

b-aa-1+3c4-5+.log

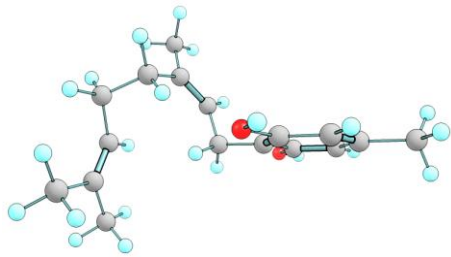

Standard orientation:

| Center Number | Atomic Number | Atomic Type | Coordinates (Angstroms) |           |           |
|---------------|---------------|-------------|-------------------------|-----------|-----------|
|               |               |             | X                       | Y         | Z         |
| 1             | 6             | 0           | -2.488052               | 0.293760  | 1.196067  |
| 2             | 6             | 0           | -3.816944               | 0.055108  | 0.836348  |
| 3             | 6             | 0           | -4.112938               | -0.599884 | -0.364908 |
| 4             | 6             | 0           | -3.061166               | -1.005993 | -1.188742 |
| 5             | 6             | 0           | -1.733453               | -0.759234 | -0.813917 |
| 6             | 6             | 0           | -1.414258               | -0.112484 | 0.387080  |
| 7             | 1             | 0           | -4.620322               | 0.383412  | 1.491731  |
| 8             | 1             | 0           | -3.267648               | -1.514697 | -2.127361 |
| 9             | 8             | 0           | -2.160209               | 0.938758  | 2.360954  |
| 10            | 1             | 0           | -2.969619               | 1.158424  | 2.842470  |
| 11            | 8             | 0           | -0.685399               | -1.149011 | -1.608430 |
| 12            | 1             | 0           | -1.029128               | -1.588097 | -2.398216 |
| 13            | 6             | 0           | 0.020845                | 0.175054  | 0.783215  |
| 14            | 6             | 0           | 0.419080                | 1.602889  | 0.480260  |
| 15            | 1             | 0           | 0.688729                | -0.530355 | 0.289496  |
| 16            | 1             | 0           | 0.124290                | 0.008855  | 1.862324  |
| 17            | 6             | 0           | 1.285919                | 2.029592  | -0.450606 |
| 18            | 1             | 0           | -0.085378               | 2.347600  | 1.095696  |
| 19            | 6             | 0           | 2.041368                | 1.113754  | -1.394459 |
| 20            | 1             | 0           | 1.481514                | 0.191281  | -1.570147 |
| 21            | 1             | 0           | 2.134878                | 1.616121  | -2.366742 |
| 22            | 6             | 0           | 3.469197                | 0.748895  | -0.902406 |
| 23            | 6             | 0           | 3.453685                | -0.052253 | 0.371026  |
| 24            | 1             | 0           | 4.035896                | 1.676016  | -0.739792 |
| 25            | 1             | 0           | 3.983698                | 0.212079  | -1.705359 |
| 26            | 6             | 0           | 3.694168                | -1.363307 | 0.529246  |
| 27            | 1             | 0           | 3.157242                | 0.512169  | 1.254766  |
| 28            | 6             | 0           | 3.577075                | -2.014855 | 1.886729  |
| 29            | 1             | 0           | 2.822027                | -2.812231 | 1.871980  |
| 30            | 1             | 0           | 4.522613                | -2.490148 | 2.180197  |
| 31            | 1             | 0           | 3.298640                | -1.298139 | 2.664653  |
| 32            | 6             | 0           | 1.588580                | 3.501152  | -0.611155 |
| 33            | 1             | 0           | 2.664377                | 3.696075  | -0.511451 |
| 34            | 1             | 0           | 1.065228                | 4.113807  | 0.128644  |
| 35            | 1             | 0           | 1.304026                | 3.853124  | -1.611781 |
| 36            | 6             | 0           | 4.077987                | -2.310787 | -0.580757 |
| 37            | 1             | 0           | 5.038368                | -2.795379 | -0.361145 |
| 38            | 1             | 0           | 4.158236                | -1.827864 | -1.556244 |
| 39            | 1             | 0           | 3.337975                | -3.117432 | -0.665283 |
| 40            | 6             | 0           | -5.549706               | -0.858426 | -0.753364 |
| 41            | 1             | 0           | -5.620975               | -1.357603 | -1.723229 |
| 42            | 1             | 0           | -6.117065               | 0.077140  | -0.812102 |
| 43            | 1             | 0           | -6.051064               | -1.490012 | -0.011228 |

Frequencies -- 16.1350 21.9760 32.6515  
 Frequencies -- 43.9855 52.0195 55.9109  
 Frequencies -- 66.4558 106.8094 125.6878

Zero-point correction= 0.372890 (Hartree/Particle)  
 Thermal correction to Energy= 0.394359  
 Thermal correction to Enthalpy= 0.395303  
 Thermal correction to Gibbs Free Energy= 0.320230  
 Sum of electronic and zero-point Energies= -812.401790  
 Sum of electronic and thermal Energies= -812.380321  
 Sum of electronic and thermal Enthalpies= -812.379377  
 Sum of electronic and thermal Free Energies= -812.454450

b-aa-1+3c4-5-.log

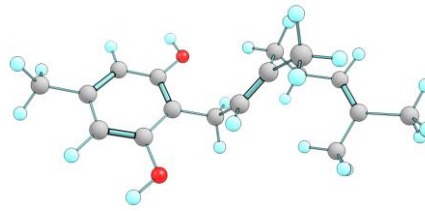

Standard orientation:

| Center Number | Atomic Number | Atomic Type | Coordinates (Angstroms) |           |           |
|---------------|---------------|-------------|-------------------------|-----------|-----------|
|               |               |             | X                       | Y         | Z         |
| 1             | 6             | 0           | 2.589508                | 1.343018  | -0.185895 |
| 2             | 6             | 0           | 3.955991                | 1.216088  | 0.085676  |
| 3             | 6             | 0           | 4.552900                | -0.048263 | 0.107668  |
| 4             | 6             | 0           | 3.763821                | -1.172861 | -0.151233 |
| 5             | 6             | 0           | 2.398042                | -1.029489 | -0.421536 |
| 6             | 6             | 0           | 1.780370                | 0.229192  | -0.455460 |
| 7             | 1             | 0           | 4.550513                | 2.105008  | 0.282744  |
| 8             | 1             | 0           | 4.207941                | -2.165442 | -0.141882 |
| 9             | 8             | 0           | 1.968805                | 2.565409  | -0.205740 |
| 10            | 1             | 0           | 2.618744                | 3.256535  | -0.018275 |
| 11            | 8             | 0           | 1.602905                | -2.117298 | -0.677394 |
| 12            | 1             | 0           | 2.138113                | -2.921451 | -0.635886 |
| 13            | 6             | 0           | 0.296110                | 0.382904  | -0.726082 |
| 14            | 6             | 0           | -0.495415               | 0.511459  | 0.556462  |
| 15            | 1             | 0           | -0.049513               | -0.463630 | -1.320592 |
| 16            | 1             | 0           | 0.142749                | 1.286397  | -1.328332 |
| 17            | 6             | 0           | -1.391269               | -0.358330 | 1.045973  |
| 18            | 1             | 0           | -0.274347               | 1.410562  | 1.131269  |
| 19            | 6             | 0           | -1.777206               | -1.643089 | 0.333238  |
| 20            | 1             | 0           | -0.887331               | -2.119113 | -0.091584 |
| 21            | 1             | 0           | -2.193918               | -2.349374 | 1.062342  |
| 22            | 6             | 0           | -2.815250               | -1.430106 | -0.800996 |
| 23            | 6             | 0           | -4.140797               | -0.909066 | -0.313268 |
| 24            | 1             | 0           | -2.974187               | -2.395441 | -1.300818 |
| 25            | 1             | 0           | -2.382491               | -0.760973 | -1.550311 |
| 26            | 6             | 0           | -4.614857               | 0.344168  | -0.394676 |
| 27            | 1             | 0           | -4.761915               | -1.648870 | 0.194843  |
| 28            | 6             | 0           | -5.968155               | 0.703688  | 0.170863  |
| 29            | 1             | 0           | -5.875175               | 1.477877  | 0.944186  |
| 30            | 1             | 0           | -6.621034               | 1.121896  | -0.606953 |
| 31            | 1             | 0           | -6.473656               | -0.159898 | 0.612639  |
| 32            | 6             | 0           | -2.100880               | -0.092032 | 2.351097  |
| 33            | 1             | 0           | -3.186785               | -0.081906 | 2.199265  |
| 34            | 1             | 0           | -1.804419               | 0.863377  | 2.794650  |
| 35            | 1             | 0           | -1.892769               | -0.887625 | 3.079238  |
| 36            | 6             | 0           | -3.878916               | 1.501171  | -1.025159 |
| 37            | 1             | 0           | -4.458863               | 1.923171  | -1.856646 |
| 38            | 1             | 0           | -2.887412               | 1.233937  | -1.392754 |
| 39            | 1             | 0           | -3.751740               | 2.309858  | -0.294002 |
| 40            | 6             | 0           | 6.018770                | -0.198944 | 0.439759  |
| 41            | 1             | 0           | 6.165970                | -0.309285 | 1.521152  |
| 42            | 1             | 0           | 6.592732                | 0.676155  | 0.121184  |
| 43            | 1             | 0           | 6.448511                | -1.083688 | -0.038995 |

Frequencies -- 15.1888 19.0996 34.6721  
 Frequencies -- 41.8553 50.3490 60.3794  
 Frequencies -- 80.6952 112.2715 128.4619

Zero-point correction= 0.372990 (Hartree/Particle)  
 Thermal correction to Energy= 0.394355  
 Thermal correction to Enthalpy= 0.395299  
 Thermal correction to Gibbs Free Energy= 0.320567  
 Sum of electronic and zero-point Energies= -812.401883  
 Sum of electronic and thermal Energies= -812.380518  
 Sum of electronic and thermal Enthalpies= -812.379574  
 Sum of electronic and thermal Free Energies= -812.454306

b-aa-1+3c4-5a.log

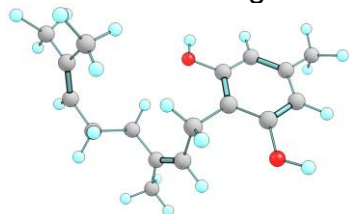

Standard orientation:

| Center Number | Atomic Number | Atomic Type | Coordinates (Angstroms) |           |           |
|---------------|---------------|-------------|-------------------------|-----------|-----------|
|               |               |             | X                       | Y         | Z         |
| 1             | 6             | 0           | -2.860373               | 0.644822  | 0.754101  |
| 2             | 6             | 0           | -3.998479               | 0.001214  | 0.258669  |
| 3             | 6             | 0           | -3.873076               | -1.191717 | -0.460630 |
| 4             | 6             | 0           | -2.597994               | -1.726454 | -0.663112 |
| 5             | 6             | 0           | -1.467841               | -1.070786 | -0.159646 |
| 6             | 6             | 0           | -1.569828               | 0.128290  | 0.560010  |
| 7             | 1             | 0           | -4.980734               | 0.433470  | 0.433972  |
| 8             | 1             | 0           | -2.477518               | -2.655871 | -1.214626 |
| 9             | 8             | 0           | -2.944547               | 1.815912  | 1.461904  |
| 10            | 1             | 0           | -3.873024               | 2.073939  | 1.543189  |
| 11            | 8             | 0           | -0.208310               | -1.584179 | -0.344774 |
| 12            | 1             | 0           | -0.266422               | -2.402746 | -0.855749 |
| 13            | 6             | 0           | -0.350704               | 0.859670  | 1.091133  |
| 14            | 6             | 0           | -0.000167               | 2.085861  | 0.272815  |
| 15            | 1             | 0           | 0.489474                | 0.166517  | 1.135494  |
| 16            | 1             | 0           | -0.560095               | 1.179332  | 2.119097  |
| 17            | 6             | 0           | 1.010402                | 2.201053  | -0.601951 |
| 18            | 1             | 0           | -0.663890               | 2.936435  | 0.421516  |
| 19            | 6             | 0           | 1.978217                | 1.072884  | -0.897591 |
| 20            | 1             | 0           | 1.477597                | 0.104776  | -0.819404 |
| 21            | 1             | 0           | 2.334223                | 1.158290  | -1.932546 |
| 22            | 6             | 0           | 3.208501                | 1.063762  | 0.048393  |
| 23            | 6             | 0           | 4.121433                | -0.100861 | -0.237386 |
| 24            | 1             | 0           | 2.845623                | 1.038340  | 1.081569  |
| 25            | 1             | 0           | 3.757480                | 2.006970  | -0.062618 |
| 26            | 6             | 0           | 4.033727                | -1.331803 | 0.291689  |
| 27            | 1             | 0           | 4.878842                | 0.069723  | -1.003362 |
| 28            | 6             | 0           | 4.958191                | -2.442400 | -0.144422 |
| 29            | 1             | 0           | 5.537374                | -2.829341 | 0.704564  |
| 30            | 1             | 0           | 4.386394                | -3.292902 | -0.539589 |
| 31            | 1             | 0           | 5.660262                | -2.116477 | -0.917446 |
| 32            | 6             | 0           | 1.271855                | 3.494465  | -1.334892 |
| 33            | 1             | 0           | 2.295775                | 3.846892  | -1.152573 |
| 34            | 1             | 0           | 0.581759                | 4.288223  | -1.034082 |
| 35            | 1             | 0           | 1.183293                | 3.355089  | -2.420527 |
| 36            | 6             | 0           | 3.006242                | -1.735524 | 1.322794  |
| 37            | 1             | 0           | 2.203870                | -2.323646 | 0.859338  |
| 38            | 1             | 0           | 2.535316                | -0.881045 | 1.813186  |
| 39            | 1             | 0           | 3.458855                | -2.365122 | 2.098358  |
| 40            | 6             | 0           | -5.093300               | -1.871061 | -1.035955 |
| 41            | 1             | 0           | -4.929407               | -2.944304 | -1.168308 |
| 42            | 1             | 0           | -5.345874               | -1.454502 | -2.018746 |
| 43            | 1             | 0           | -5.967146               | -1.734392 | -0.391853 |

Frequencies -- 14.8548 21.4924 41.3708  
 Frequencies -- 49.3186 55.5067 57.7812  
 Frequencies -- 70.4585 98.0526 121.7778

Zero-point correction= 0.372797 (Hartree/Particle)  
 Thermal correction to Energy= 0.394337  
 Thermal correction to Enthalpy= 0.395281  
 Thermal correction to Gibbs Free Energy= 0.320213  
 Sum of electronic and zero-point Energies= -812.401836  
 Sum of electronic and thermal Energies= -812.380296  
 Sum of electronic and thermal Enthalpies= -812.379352  
 Sum of electronic and thermal Free Energies= -812.454420

b-aa-1+3c4a5+.log

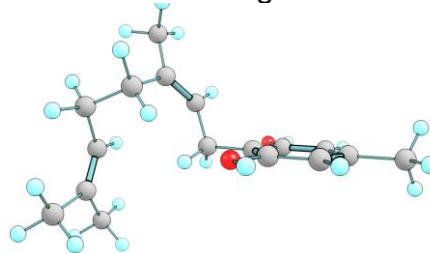

Standard orientation:

| Center Number | Atomic Number | Atomic Type | Coordinates (Angstroms) |           |           |
|---------------|---------------|-------------|-------------------------|-----------|-----------|
|               |               |             | X                       | Y         | Z         |
| 1             | 6             | 0           | -2.488296               | 0.294807  | 1.195636  |
| 2             | 6             | 0           | -3.817052               | 0.055881  | 0.835664  |
| 3             | 6             | 0           | -4.112662               | -0.600126 | -0.365145 |
| 4             | 6             | 0           | -3.060619               | -1.006809 | -1.188329 |
| 5             | 6             | 0           | -1.733023               | -0.759756 | -0.813250 |
| 6             | 6             | 0           | -1.414217               | -0.112076 | 0.387327  |
| 7             | 1             | 0           | -4.620647               | 0.384732  | 1.490501  |
| 8             | 1             | 0           | -3.266760               | -1.516160 | -2.126666 |
| 9             | 8             | 0           | -2.160830               | 0.940782  | 2.360086  |
| 10            | 1             | 0           | -2.970399               | 1.160809  | 2.841172  |
| 11            | 8             | 0           | -0.684720               | -1.150040 | -1.607185 |
| 12            | 1             | 0           | -1.028183               | -1.589879 | -2.396661 |
| 13            | 6             | 0           | 0.020747                | 0.175846  | 0.783688  |
| 14            | 6             | 0           | 0.419050                | 1.603485  | 0.479905  |
| 15            | 1             | 0           | 0.688839                | -0.529848 | 0.290661  |
| 16            | 1             | 0           | 0.123870                | 0.010370  | 1.862937  |
| 17            | 6             | 0           | 1.285851                | 2.029590  | -0.451272 |
| 18            | 1             | 0           | -0.085289               | 2.348604  | 1.094931  |
| 19            | 6             | 0           | 2.041141                | 1.113192  | -1.394718 |
| 20            | 1             | 0           | 1.481210                | 0.190677  | -1.569881 |
| 21            | 1             | 0           | 2.134641                | 1.615056  | -2.367256 |
| 22            | 6             | 0           | 3.468978                | 0.748487  | -0.902570 |
| 23            | 6             | 0           | 3.453505                | -0.052276 | 0.371097  |
| 24            | 1             | 0           | 4.035663                | 1.675663  | -0.740255 |
| 25            | 1             | 0           | 3.983465                | 0.211442  | -1.705375 |
| 26            | 6             | 0           | 3.693974                | -1.363285 | 0.529701  |
| 27            | 1             | 0           | 3.157101                | 0.512409  | 1.254679  |
| 28            | 6             | 0           | 3.576916                | -2.014451 | 1.887365  |
| 29            | 1             | 0           | 2.821784                | -2.811754 | 1.872894  |
| 30            | 1             | 0           | 4.522414                | -2.489775 | 2.180897  |
| 31            | 1             | 0           | 3.298617                | -1.297513 | 2.665127  |
| 32            | 6             | 0           | 1.588601                | 3.501037  | -0.612685 |
| 33            | 1             | 0           | 2.664428                | 3.695948  | -0.513284 |
| 34            | 1             | 0           | 1.065427                | 4.114153  | 0.126852  |
| 35            | 1             | 0           | 1.303910                | 3.852484  | -1.613455 |
| 36            | 6             | 0           | 4.077765                | -2.311089 | -0.580032 |
| 37            | 1             | 0           | 5.038292                | -2.795399 | -0.360428 |
| 38            | 1             | 0           | 4.157734                | -1.828514 | -1.555710 |
| 39            | 1             | 0           | 3.337925                | -3.117931 | -0.664131 |
| 40            | 6             | 0           | -5.549293               | -0.859940 | -0.753244 |
| 41            | 1             | 0           | -5.620723               | -1.351621 | -1.726911 |
| 42            | 1             | 0           | -6.119755               | 0.074197  | -0.803301 |
| 43            | 1             | 0           | -6.047315               | -1.499181 | -0.015376 |

Frequencies -- 16.0266 21.9868 32.6031  
 Frequencies -- 39.3866 51.9586 55.8862  
 Frequencies -- 66.4548 106.8037 125.6575

Zero-point correction= 0.372879 (Hartree/Particle)  
 Thermal correction to Energy= 0.394358  
 Thermal correction to Enthalpy= 0.395302  
 Thermal correction to Gibbs Free Energy= 0.320116  
 Sum of electronic and zero-point Energies= -812.401802  
 Sum of electronic and thermal Energies= -812.380322  
 Sum of electronic and thermal Enthalpies= -812.379378  
 Sum of electronic and thermal Free Energies= -812.454564

b-aa-1+3c4a5-.log

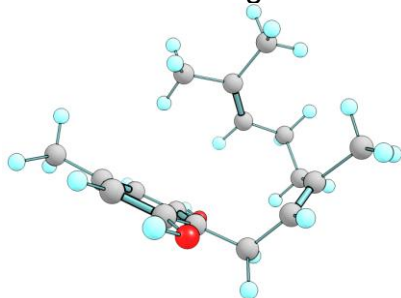

Standard orientation:

| Center Number | Atomic Number | Atomic Type | Coordinates (Angstroms) |           |           |
|---------------|---------------|-------------|-------------------------|-----------|-----------|
|               |               |             | X                       | Y         | Z         |
| 1             | 6             | 0           | 1.732683                | -1.222717 | -0.969159 |
| 2             | 6             | 0           | 2.774409                | -0.295683 | -1.074284 |
| 3             | 6             | 0           | 3.118585                | 0.500261  | 0.022562  |
| 4             | 6             | 0           | 2.414242                | 0.340109  | 1.218587  |
| 5             | 6             | 0           | 1.371015                | -0.589737 | 1.305976  |
| 6             | 6             | 0           | 0.999613                | -1.388513 | 0.216277  |
| 7             | 1             | 0           | 3.313307                | -0.195563 | -2.013467 |
| 8             | 1             | 0           | 2.670236                | 0.942031  | 2.087245  |
| 9             | 8             | 0           | 1.373233                | -2.024449 | -2.020622 |
| 10            | 1             | 0           | 1.938905                | -1.828337 | -2.780001 |
| 11            | 8             | 0           | 0.660922                | -0.748539 | 2.470275  |
| 12            | 1             | 0           | 0.988966                | -0.124162 | 3.131609  |
| 13            | 6             | 0           | -0.147712               | -2.380349 | 0.290128  |
| 14            | 6             | 0           | -1.338804               | -1.990091 | -0.564678 |
| 15            | 1             | 0           | -0.438949               | -2.505079 | 1.333864  |
| 16            | 1             | 0           | 0.215175                | -3.354818 | -0.058376 |
| 17            | 6             | 0           | -2.418471               | -1.283402 | -0.196665 |
| 18            | 1             | 0           | -1.273413               | -2.314634 | -1.601546 |
| 19            | 6             | 0           | -2.638427               | -0.720042 | 1.190762  |
| 20            | 1             | 0           | -3.575036               | -1.128147 | 1.598365  |
| 21            | 1             | 0           | -1.832777               | -1.021837 | 1.864494  |
| 22            | 6             | 0           | -2.739045               | 0.830145  | 1.226284  |
| 23            | 6             | 0           | -1.465695               | 1.487301  | 0.770667  |
| 24            | 1             | 0           | -2.947000               | 1.120405  | 2.265852  |
| 25            | 1             | 0           | -3.600385               | 1.161915  | 0.639671  |
| 26            | 6             | 0           | -1.263207               | 2.288154  | -0.286517 |
| 27            | 1             | 0           | -0.597479               | 1.224078  | 1.372332  |
| 28            | 6             | 0           | 0.120789                | 2.797910  | -0.614072 |
| 29            | 1             | 0           | 0.422523                | 2.479989  | -1.621351 |
| 30            | 1             | 0           | 0.149441                | 3.895964  | -0.614874 |
| 31            | 1             | 0           | 0.870427                | 2.428158  | 0.090151  |
| 32            | 6             | 0           | -3.515964               | -0.995157 | -1.195469 |
| 33            | 1             | 0           | -4.495010               | -1.297765 | -0.801065 |
| 34            | 1             | 0           | -3.351985               | -1.518610 | -2.141610 |
| 35            | 1             | 0           | -3.587313               | 0.076295  | -1.415835 |
| 36            | 6             | 0           | -2.335046               | 2.748098  | -1.244093 |
| 37            | 1             | 0           | -2.336922               | 3.843221  | -1.321378 |
| 38            | 1             | 0           | -3.339781               | 2.432459  | -0.957165 |
| 39            | 1             | 0           | -2.136618               | 2.367832  | -2.254949 |
| 40            | 6             | 0           | 4.202413                | 1.544683  | -0.097085 |
| 41            | 1             | 0           | 4.688193                | 1.730875  | 0.865136  |
| 42            | 1             | 0           | 3.784411                | 2.498388  | -0.442443 |
| 43            | 1             | 0           | 4.969579                | 1.245433  | -0.817214 |

Frequencies -- 28.6869 36.4086 42.6332  
 Frequencies -- 67.2573 70.6266 79.3396  
 Frequencies -- 96.9453 126.4998 141.1410

Zero-point correction= 0.373541 (Hartree/Particle)  
 Thermal correction to Energy= 0.394571  
 Thermal correction to Enthalpy= 0.395516  
 Thermal correction to Gibbs Free Energy= 0.323953  
 Sum of electronic and zero-point Energies= -812.405016  
 Sum of electronic and thermal Energies= -812.383986  
 Sum of electronic and thermal Enthalpies= -812.383041  
 Sum of electronic and thermal Free Energies= -812.454604

b-aa-1+3c4a5a.log

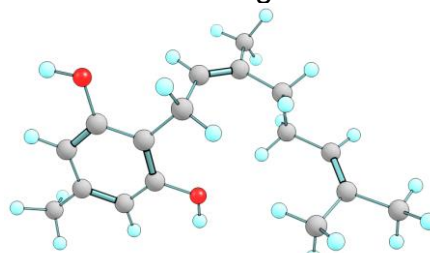

Standard orientation:

| Center Number | Atomic Number | Atomic Type | Coordinates (Angstroms) |           |           |
|---------------|---------------|-------------|-------------------------|-----------|-----------|
|               |               |             | X                       | Y         | Z         |
| 1             | 6             | 0           | 3.031412                | 0.657852  | -0.656979 |
| 2             | 6             | 0           | 4.094706                | -0.090775 | -0.141813 |
| 3             | 6             | 0           | 3.854828                | -1.330246 | 0.459096  |
| 4             | 6             | 0           | 2.541558                | -1.803571 | 0.528411  |
| 5             | 6             | 0           | 1.488722                | -1.041780 | 0.009352  |
| 6             | 6             | 0           | 1.705559                | 0.199879  | -0.604783 |
| 7             | 1             | 0           | 5.108264                | 0.297469  | -0.208103 |
| 8             | 1             | 0           | 2.331251                | -2.765731 | 0.989279  |
| 9             | 8             | 0           | 3.229530                | 1.881089  | -1.243238 |
| 10            | 1             | 0           | 4.173672                | 2.090218  | -1.235167 |
| 11            | 8             | 0           | 0.192278                | -1.485991 | 0.071654  |
| 12            | 1             | 0           | 0.163279                | -2.344543 | 0.515327  |
| 13            | 6             | 0           | 0.568903                | 1.040779  | -1.153689 |
| 14            | 6             | 0           | 0.150568                | 2.112258  | -0.170865 |
| 15            | 1             | 0           | -0.269054               | 0.391834  | -1.411798 |
| 16            | 1             | 0           | 0.912373                | 1.517776  | -2.080631 |
| 17            | 6             | 0           | -1.081515               | 2.364308  | 0.295422  |
| 18            | 1             | 0           | 0.974288                | 2.727858  | 0.190304  |
| 19            | 6             | 0           | -2.319201               | 1.587651  | -0.104741 |
| 20            | 1             | 0           | -3.176264               | 2.273374  | -0.141821 |
| 21            | 1             | 0           | -2.221315               | 1.165823  | -1.109805 |
| 22            | 6             | 0           | -2.648284               | 0.430600  | 0.875741  |
| 23            | 6             | 0           | -3.977378               | -0.209346 | 0.570819  |
| 24            | 1             | 0           | -2.670576               | 0.830031  | 1.898129  |
| 25            | 1             | 0           | -1.827797               | -0.290501 | 0.838391  |
| 26            | 6             | 0           | -4.207183               | -1.325564 | -0.138494 |
| 27            | 1             | 0           | -4.845996               | 0.335541  | 0.944618  |
| 28            | 6             | 0           | -5.612734               | -1.824139 | -0.376364 |
| 29            | 1             | 0           | -5.831895               | -1.882647 | -1.450906 |
| 30            | 1             | 0           | -5.740060               | -2.841072 | 0.018794  |
| 31            | 1             | 0           | -6.364365               | -1.181024 | 0.090649  |
| 32            | 6             | 0           | -1.317378               | 3.461110  | 1.307725  |
| 33            | 1             | 0           | -1.988704               | 4.230053  | 0.902938  |
| 34            | 1             | 0           | -0.386424               | 3.946732  | 1.614272  |
| 35            | 1             | 0           | -1.806838               | 3.068872  | 2.208729  |
| 36            | 6             | 0           | -3.129011               | -2.179483 | -0.760362 |
| 37            | 1             | 0           | -3.153499               | -3.196225 | -0.344977 |
| 38            | 1             | 0           | -2.123658               | -1.779213 | -0.624811 |
| 39            | 1             | 0           | -3.307410               | -2.286585 | -1.838478 |
| 40            | 6             | 0           | 4.991269                | -2.127627 | 1.054187  |
| 41            | 1             | 0           | 4.783216                | -3.201213 | 1.028438  |
| 42            | 1             | 0           | 5.155196                | -1.851916 | 2.103145  |
| 43            | 1             | 0           | 5.928805                | -1.947131 | 0.520181  |

Frequencies -- 16.9348 27.4577 44.9187  
 Frequencies -- 47.6582 54.4543 60.4548  
 Frequencies -- 75.9054 103.7095 127.1874

Zero-point correction= 0.373049 (Hartree/Particle)  
 Thermal correction to Energy= 0.394438  
 Thermal correction to Enthalpy= 0.395382  
 Thermal correction to Gibbs Free Energy= 0.321166  
 Sum of electronic and zero-point Energies= -812.402973  
 Sum of electronic and thermal Energies= -812.381585  
 Sum of electronic and thermal Enthalpies= -812.380641  
 Sum of electronic and thermal Free Energies= -812.454857

# Cannabigerocin-aa-1-3c

b-aa-1-3c4+5+.log

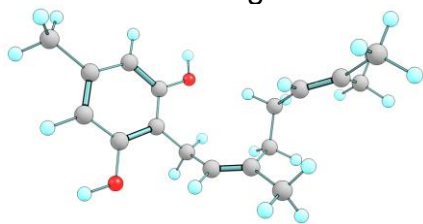

Standard orientation:

| Center Number | Atomic Number | Atomic Type | Coordinates (Angstroms) |           |           |
|---------------|---------------|-------------|-------------------------|-----------|-----------|
|               |               |             | X                       | Y         | Z         |
| 1             | 6             | 0           | 1.905392                | -0.854597 | -0.852666 |
| 2             | 6             | 0           | 2.877824                | -1.745331 | -0.382386 |
| 3             | 6             | 0           | 3.935443                | -1.284789 | 0.406202  |
| 4             | 6             | 0           | 4.007580                | 0.078697  | 0.707773  |
| 5             | 6             | 0           | 3.027681                | 0.955487  | 0.231845  |
| 6             | 6             | 0           | 1.953378                | 0.515631  | -0.557899 |
| 7             | 1             | 0           | 2.806413                | -2.800001 | -0.637359 |
| 8             | 1             | 0           | 4.825064                | 0.462644  | 1.313554  |
| 9             | 8             | 0           | 0.869256                | -1.287598 | -1.640009 |
| 10            | 1             | 0           | 0.929168                | -2.246074 | -1.752303 |
| 11            | 8             | 0           | 3.068235                | 2.297618  | 0.508910  |
| 12            | 1             | 0           | 3.845994                | 2.487855  | 1.051135  |
| 13            | 6             | 0           | 0.894260                | 1.490912  | -1.038075 |
| 14            | 6             | 0           | -0.044725               | 1.898062  | 0.076860  |
| 15            | 1             | 0           | 0.351203                | 1.051526  | -1.875245 |
| 16            | 1             | 0           | 1.402915                | 2.389179  | -1.413630 |
| 17            | 6             | 0           | -1.384411               | 1.832038  | 0.088403  |
| 18            | 1             | 0           | 0.459998                | 2.293092  | 0.957669  |
| 19            | 6             | 0           | -2.217321               | 1.298643  | -1.064148 |
| 20            | 1             | 0           | -3.211304               | 1.761360  | -1.028831 |
| 21            | 1             | 0           | -1.774560               | 1.585051  | -2.024701 |
| 22            | 6             | 0           | -2.395654               | -0.245187 | -1.058726 |
| 23            | 6             | 0           | -2.981174               | -0.789730 | 0.217594  |
| 24            | 1             | 0           | -1.410679               | -0.697466 | -1.215747 |
| 25            | 1             | 0           | -3.012088               | -0.517701 | -1.922407 |
| 26            | 6             | 0           | -4.252131               | -1.149628 | 0.457882  |
| 27            | 1             | 0           | -2.273852               | -0.872475 | 1.043473  |
| 28            | 6             | 0           | -4.674354               | -1.666823 | 1.812393  |
| 29            | 1             | 0           | -5.457884               | -1.031999 | 2.247290  |
| 30            | 1             | 0           | -5.103560               | -2.674625 | 1.732630  |
| 31            | 1             | 0           | -3.838488               | -1.706889 | 2.516830  |
| 32            | 6             | 0           | -2.169706               | 2.299132  | 1.292160  |
| 33            | 1             | 0           | -2.821385               | 3.142528  | 1.026798  |
| 34            | 1             | 0           | -1.518258               | 2.616365  | 2.112021  |
| 35            | 1             | 0           | -2.829247               | 1.504179  | 1.659827  |
| 36            | 6             | 0           | -5.369067               | -1.075836 | -0.554384 |
| 37            | 1             | 0           | -5.822487               | -2.064539 | -0.704450 |
| 38            | 1             | 0           | -5.048291               | -0.698277 | -1.527029 |
| 39            | 1             | 0           | -6.171293               | -0.421667 | -0.188618 |
| 40            | 6             | 0           | 4.966019                | -2.246842 | 0.948277  |
| 41            | 1             | 0           | 5.940400                | -1.763753 | 1.066633  |
| 42            | 1             | 0           | 5.089976                | -3.112226 | 0.290816  |
| 43            | 1             | 0           | 4.668117                | -2.625280 | 1.933809  |

Frequencies -- 7.9315 20.1070 35.6779  
 Frequencies -- 40.4453 45.5817 71.7259  
 Frequencies -- 82.3716 98.1725 132.5488

Zero-point correction= 0.372821 (Hartree/Particle)  
 Thermal correction to Energy= 0.394299  
 Thermal correction to Enthalpy= 0.395243  
 Thermal correction to Gibbs Free Energy= 0.319630  
 Sum of electronic and zero-point Energies= -812.400653  
 Sum of electronic and thermal Energies= -812.379176  
 Sum of electronic and thermal Enthalpies= -812.378231  
 Sum of electronic and thermal Free Energies= -812.453844

# b-aa-1-3c4+5-.log

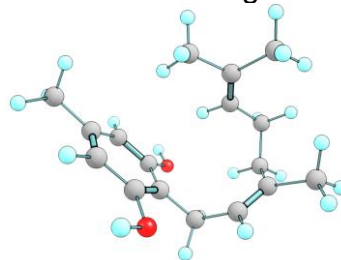

Standard orientation:

| Center Number | Atomic Number | Atomic Type | Coordinates (Angstroms) |           |           |
|---------------|---------------|-------------|-------------------------|-----------|-----------|
|               |               |             | X                       | Y         | Z         |
| 1             | 6             | 0           | 1.371001                | -0.589694 | 1.306007  |
| 2             | 6             | 0           | 2.414382                | 0.339969  | 1.218687  |
| 3             | 6             | 0           | 3.118779                | 0.500040  | 0.022667  |
| 4             | 6             | 0           | 2.774553                | -0.295847 | -1.074194 |
| 5             | 6             | 0           | 1.732637                | -1.222699 | -0.969142 |
| 6             | 6             | 0           | 0.999512                | -1.388403 | 0.216259  |
| 7             | 1             | 0           | 2.670401                | 0.941916  | 2.087327  |
| 8             | 1             | 0           | 3.313528                | -0.195848 | -2.013344 |
| 9             | 8             | 0           | 0.660794                | -0.748390 | 2.470245  |
| 10            | 1             | 0           | 0.988806                | -0.124001 | 3.131584  |
| 11            | 8             | 0           | 1.373141                | -2.024352 | -2.020657 |
| 12            | 1             | 0           | 1.938925                | -1.828346 | -2.779980 |
| 13            | 6             | 0           | -0.147868               | -2.380175 | 0.290069  |
| 14            | 6             | 0           | -1.338981               | -1.989909 | -0.564715 |
| 15            | 1             | 0           | -0.439113               | -2.504903 | 1.333805  |
| 16            | 1             | 0           | 0.214993                | -3.354635 | -0.058485 |
| 17            | 6             | 0           | -2.418643               | -1.283238 | -0.196655 |
| 18            | 1             | 0           | -1.273610               | -2.314478 | -1.601582 |
| 19            | 6             | 0           | -2.638511               | -0.719899 | 1.190795  |
| 20            | 1             | 0           | -3.575155               | -1.127931 | 1.598383  |
| 21            | 1             | 0           | -1.832880               | -1.021796 | 1.864511  |
| 22            | 6             | 0           | -2.738999               | 0.830303  | 1.226416  |
| 23            | 6             | 0           | -1.465610               | 1.487344  | 0.770715  |
| 24            | 1             | 0           | -2.946879               | 1.120510  | 2.266011  |
| 25            | 1             | 0           | -3.600335               | 1.162140  | 0.639843  |
| 26            | 6             | 0           | -1.263075               | 2.288052  | -0.286587 |
| 27            | 1             | 0           | -0.597385               | 1.224016  | 1.372321  |
| 28            | 6             | 0           | 0.120997                | 2.797457  | -0.614370 |
| 29            | 1             | 0           | 0.422561                | 2.479200  | -1.621590 |
| 30            | 1             | 0           | 0.149867                | 3.895501  | -0.615448 |
| 31            | 1             | 0           | 0.870610                | 2.427718  | 0.089883  |
| 32            | 6             | 0           | -3.516240               | -0.995041 | -1.195362 |
| 33            | 1             | 0           | -4.495183               | -1.298094 | -0.801034 |
| 34            | 1             | 0           | -3.352084               | -1.518156 | -2.141657 |
| 35            | 1             | 0           | -3.587943               | 0.076454  | -1.415394 |
| 36            | 6             | 0           | -2.334886               | 2.748081  | -1.244173 |
| 37            | 1             | 0           | -2.336449               | 3.843189  | -1.321701 |
| 38            | 1             | 0           | -3.339679               | 2.432814  | -0.957055 |
| 39            | 1             | 0           | -2.136692               | 2.367533  | -2.254964 |
| 40            | 6             | 0           | 4.202572                | 1.544485  | -0.097024 |
| 41            | 1             | 0           | 4.970106                | 1.244932  | -0.816633 |
| 42            | 1             | 0           | 4.687847                | 1.731344  | 0.865321  |
| 43            | 1             | 0           | 3.784549                | 2.497905  | -0.443167 |

Frequencies -- 28.7108 36.4203 42.6597  
 Frequencies -- 67.4012 70.8620 79.3392  
 Frequencies -- 96.9506 126.5106 141.1451

Zero-point correction= 0.373542 (Hartree/Particle)  
 Thermal correction to Energy= 0.394571  
 Thermal correction to Enthalpy= 0.395516  
 Thermal correction to Gibbs Free Energy= 0.323960  
 Sum of electronic and zero-point Energies= -812.405014  
 Sum of electronic and thermal Energies= -812.383985  
 Sum of electronic and thermal Enthalpies= -812.383041  
 Sum of electronic and thermal Free Energies= -812.454597

b-aa-1-3c4+5a.log

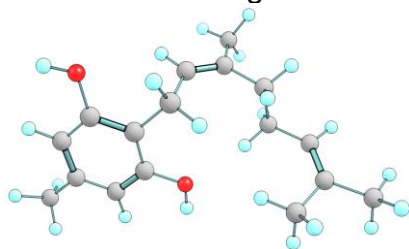

Standard orientation:

| Center Number | Atomic Number | Atomic Type | Coordinates (Angstroms) |           |           |
|---------------|---------------|-------------|-------------------------|-----------|-----------|
|               |               |             | X                       | Y         | Z         |
| 1             | 6             | 0           | 1.488761                | -1.041916 | 0.009242  |
| 2             | 6             | 0           | 2.541622                | -1.803649 | 0.528289  |
| 3             | 6             | 0           | 3.854872                | -1.330221 | 0.459064  |
| 4             | 6             | 0           | 4.094670                | -0.090696 | -0.141726 |
| 5             | 6             | 0           | 3.031330                | 0.657890  | -0.656890 |
| 6             | 6             | 0           | 1.705522                | 0.199827  | -0.604777 |
| 7             | 1             | 0           | 2.331384                | -2.765870 | 0.989057  |
| 8             | 1             | 0           | 5.108193                | 0.297647  | -0.207966 |
| 9             | 8             | 0           | 0.192347                | -1.486231 | 0.071426  |
| 10            | 1             | 0           | 0.163402                | -2.344896 | 0.514887  |
| 11            | 8             | 0           | 3.229390                | 1.881198  | -1.243018 |
| 12            | 1             | 0           | 4.173542                | 2.090291  | -1.235093 |
| 13            | 6             | 0           | 0.568837                | 1.040692  | -1.153665 |
| 14            | 6             | 0           | 0.150551                | 2.112249  | -0.170916 |
| 15            | 1             | 0           | -0.269142               | 0.391743  | -1.411689 |
| 16            | 1             | 0           | 0.912252                | 1.517616  | -2.080670 |
| 17            | 6             | 0           | -1.081529               | 2.364375  | 0.295341  |
| 18            | 1             | 0           | 0.974283                | 2.727845  | 0.190223  |
| 19            | 6             | 0           | -2.319232               | 1.587710  | -0.104749 |
| 20            | 1             | 0           | -3.176327               | 2.273401  | -0.141673 |
| 21            | 1             | 0           | -2.221464               | 1.165977  | -1.109866 |
| 22            | 6             | 0           | -2.648153               | 0.430577  | 0.875686  |
| 23            | 6             | 0           | -3.977272               | -0.209372 | 0.570908  |
| 24            | 1             | 0           | -2.670303               | 0.829947  | 1.898103  |
| 25            | 1             | 0           | -1.827657               | -0.290506 | 0.838190  |
| 26            | 6             | 0           | -4.207176               | -1.325579 | -0.138396 |
| 27            | 1             | 0           | -4.845847               | 0.335516  | 0.944801  |
| 28            | 6             | 0           | -5.612759               | -1.824103 | -0.376120 |
| 29            | 1             | 0           | -5.832036               | -1.882625 | -1.450639 |
| 30            | 1             | 0           | -5.740096               | -2.841028 | 0.019059  |
| 31            | 1             | 0           | -6.364323               | -1.180957 | 0.090955  |
| 32            | 6             | 0           | -1.317367               | 3.461241  | 1.307568  |
| 33            | 1             | 0           | -1.988532               | 4.230266  | 0.902666  |
| 34            | 1             | 0           | -0.386394               | 3.946751  | 1.614230  |
| 35            | 1             | 0           | -1.807017               | 3.069110  | 2.208519  |
| 36            | 6             | 0           | -3.129085               | -2.179506 | -0.760379 |
| 37            | 1             | 0           | -3.153553               | -3.196258 | -0.345012 |
| 38            | 1             | 0           | -2.123711               | -1.779268 | -0.624907 |
| 39            | 1             | 0           | -3.307574               | -2.286600 | -1.838481 |
| 40            | 6             | 0           | 4.991333                | -2.127518 | 1.054207  |
| 41            | 1             | 0           | 5.928835                | -1.947160 | 0.520091  |
| 42            | 1             | 0           | 4.783257                | -3.201102 | 1.028739  |
| 43            | 1             | 0           | 5.155380                | -1.851562 | 2.103087  |

Frequencies -- 16.9374 27.4513 44.9426  
 Frequencies -- 47.6658 54.4350 60.4486  
 Frequencies -- 75.9154 103.7063 127.2088

Zero-point correction= 0.373050 (Hartree/Particle)  
 Thermal correction to Energy= 0.394439  
 Thermal correction to Enthalpy= 0.395383  
 Thermal correction to Gibbs Free Energy= 0.321166  
 Sum of electronic and zero-point Energies= -812.402973  
 Sum of electronic and thermal Energies= -812.381584  
 Sum of electronic and thermal Enthalpies= -812.380640  
 Sum of electronic and thermal Free Energies= -812.454856

b-aa-1-3c4-5+.log

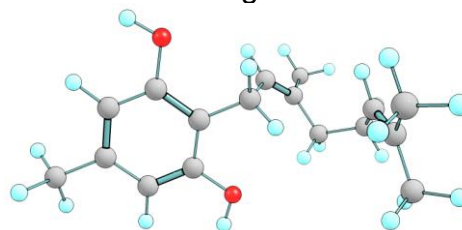

Standard orientation:

| Center Number | Atomic Number | Atomic Type | Coordinates (Angstroms) |           |           |
|---------------|---------------|-------------|-------------------------|-----------|-----------|
|               |               |             | X                       | Y         | Z         |
| 1             | 6             | 0           | -1.733750               | -0.760565 | -0.810299 |
| 2             | 6             | 0           | -3.060009               | -1.004308 | -1.187285 |
| 3             | 6             | 0           | -4.113341               | -0.592475 | -0.366074 |
| 4             | 6             | 0           | -3.818334               | 0.068587  | 0.830601  |
| 5             | 6             | 0           | -2.488335               | 0.304202  | 1.193408  |
| 6             | 6             | 0           | -1.414929               | -0.108899 | 0.389621  |
| 7             | 1             | 0           | -3.266361               | -1.514772 | -2.125142 |
| 8             | 1             | 0           | -4.621758               | 0.405477  | 1.481340  |
| 9             | 8             | 0           | -0.684101               | -1.153974 | -1.600811 |
| 10            | 1             | 0           | -1.026345               | -1.594723 | -2.390319 |
| 11            | 8             | 0           | -2.162952               | 0.956418  | 2.354963  |
| 12            | 1             | 0           | -2.973360               | 1.179788  | 2.833064  |
| 13            | 6             | 0           | 0.020160                | 0.179726  | 0.785191  |
| 14            | 6             | 0           | 0.419509                | 1.605967  | 0.476153  |
| 15            | 1             | 0           | 0.688005                | -0.528335 | 0.295249  |
| 16            | 1             | 0           | 0.122696                | 0.018431  | 1.865139  |
| 17            | 6             | 0           | 1.286440                | 2.028192  | -0.456662 |
| 18            | 1             | 0           | -0.084190               | 2.353601  | 1.088644  |
| 19            | 6             | 0           | 2.404826                | 1.108057  | -1.397191 |
| 20            | 1             | 0           | 1.480128                | 0.185412  | -1.569168 |
| 21            | 1             | 0           | 2.134445                | 1.606643  | -2.371407 |
| 22            | 6             | 0           | 3.468505                | 0.743887  | -0.904237 |
| 23            | 6             | 0           | 3.452646                | -0.053623 | 0.371458  |
| 24            | 1             | 0           | 4.035716                | 1.671172  | -0.744335 |
| 25            | 1             | 0           | 3.982650                | 0.204497  | -1.705688 |
| 26            | 6             | 0           | 3.693269                | -1.364184 | 0.533508  |
| 27            | 1             | 0           | 3.155827                | 0.513297  | 1.253470  |
| 28            | 6             | 0           | 3.575766                | -2.011941 | 1.892773  |
| 29            | 1             | 0           | 2.820932                | -2.809555 | 1.879934  |
| 30            | 1             | 0           | 4.521297                | -2.486184 | 2.187954  |
| 31            | 1             | 0           | 3.296838                | -1.293151 | 2.668598  |
| 32            | 6             | 0           | 1.590242                | 3.498866  | -0.623130 |
| 33            | 1             | 0           | 2.666261                | 3.693250  | -0.524783 |
| 34            | 1             | 0           | 1.067824                | 4.114846  | 0.114562  |
| 35            | 1             | 0           | 1.305449                | 3.847200  | -1.624960 |
| 36            | 6             | 0           | 4.077754                | -2.314786 | -0.573601 |
| 37            | 1             | 0           | 5.038039                | -2.798686 | -0.352053 |
| 38            | 1             | 0           | 4.158569                | -1.834664 | -1.550419 |
| 39            | 1             | 0           | 3.337856                | -3.121728 | -0.656262 |
| 40            | 6             | 0           | -5.545835               | -0.882792 | -0.747342 |
| 41            | 1             | 0           | -6.219302               | -0.094026 | -0.398818 |
| 42            | 1             | 0           | -5.887393               | -1.823472 | -0.298247 |
| 43            | 1             | 0           | -5.660894               | -0.977328 | -1.830925 |

Frequencies -- 16.0367 21.9851 32.6107  
 Frequencies -- 39.5734 51.9644 55.8889  
 Frequencies -- 66.4636 106.8059 125.6609

Zero-point correction= 0.372879 (Hartree/Particle)  
 Thermal correction to Energy= 0.394358  
 Thermal correction to Enthalpy= 0.395302  
 Thermal correction to Gibbs Free Energy= 0.320121  
 Sum of electronic and zero-point Energies= -812.401801  
 Sum of electronic and thermal Energies= -812.380322  
 Sum of electronic and thermal Enthalpies= -812.379378  
 Sum of electronic and thermal Free Energies= -812.454559

b-aa-1-3c4-5-.log

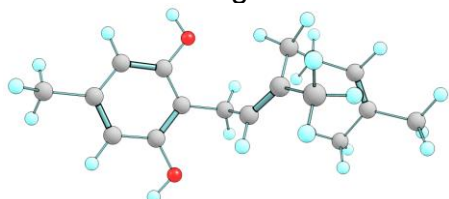

Standard orientation:

| Center Number | Atomic Number | Atomic Type | Coordinates (Angstroms) |           |           |
|---------------|---------------|-------------|-------------------------|-----------|-----------|
|               |               |             | X                       | Y         | Z         |
| 1             | 6             | 0           | 2.398059                | -1.029526 | -0.421454 |
| 2             | 6             | 0           | 3.763815                | -1.172954 | -0.151079 |
| 3             | 6             | 0           | 4.552953                | -0.048377 | 0.107752  |
| 4             | 6             | 0           | 3.956120                | 1.216004  | 0.085610  |
| 5             | 6             | 0           | 2.589654                | 1.342987  | -0.186034 |
| 6             | 6             | 0           | 1.780462                | 0.229187  | -0.455520 |
| 7             | 1             | 0           | 4.207877                | -2.165558 | -0.141621 |
| 8             | 1             | 0           | 4.550685                | 2.104912  | 0.282599  |
| 9             | 8             | 0           | 1.602863                | -2.117310 | -0.677233 |
| 10            | 1             | 0           | 2.138010                | -2.921495 | -0.635576 |
| 11            | 8             | 0           | 1.969029                | 2.565413  | -0.206039 |
| 12            | 1             | 0           | 2.618986                | 3.256506  | -0.018513 |
| 13            | 6             | 0           | 0.296223                | 0.382975  | -0.726230 |
| 14            | 6             | 0           | -0.495363               | 0.511701  | 0.556258  |
| 15            | 1             | 0           | -0.049435               | -0.463580 | -1.320686 |
| 16            | 1             | 0           | 0.142957                | 1.286437  | -1.328550 |
| 17            | 6             | 0           | -1.391240               | -0.358021 | 1.045849  |
| 18            | 1             | 0           | -0.274319               | 1.410879  | 1.130953  |
| 19            | 6             | 0           | -1.777145               | -1.642882 | 0.333284  |
| 20            | 1             | 0           | -0.887269               | -2.118910 | -0.091522 |
| 21            | 1             | 0           | -2.193790               | -2.349099 | 1.062494  |
| 22            | 6             | 0           | -2.815241               | -1.430075 | -0.800934 |
| 23            | 6             | 0           | -4.140878               | -0.909209 | -0.313240 |
| 24            | 1             | 0           | -2.974062               | -2.395449 | -1.300712 |
| 25            | 1             | 0           | -2.382580               | -0.760914 | -1.550282 |
| 26            | 6             | 0           | -4.615061               | 0.343983  | -0.394573 |
| 27            | 1             | 0           | -4.761960               | -1.649134 | 0.194739  |
| 28            | 6             | 0           | -5.968450               | 0.703316  | 0.170865  |
| 29            | 1             | 0           | -5.875606               | 1.477337  | 0.944373  |
| 30            | 1             | 0           | -6.621236               | 1.121667  | -0.606950 |
| 31            | 1             | 0           | -6.473968               | -0.160393 | 0.612375  |
| 32            | 6             | 0           | -2.100883               | -0.091565 | 2.350924  |
| 33            | 1             | 0           | -3.186786               | -0.081600 | 2.199096  |
| 34            | 1             | 0           | -1.804528               | 0.863957  | 2.794302  |
| 35            | 1             | 0           | -1.892668               | -0.887002 | 3.079209  |
| 36            | 6             | 0           | -3.879156               | 1.501107  | -1.024879 |
| 37            | 1             | 0           | -4.458938               | 1.922991  | -1.856540 |
| 38            | 1             | 0           | -2.887495               | 1.234034  | -1.392154 |
| 39            | 1             | 0           | -3.752335               | 2.309830  | -0.293699 |
| 40            | 6             | 0           | 6.018803                | -0.199120 | 0.439906  |
| 41            | 1             | 0           | 6.592714                | 0.676233  | 0.121943  |
| 42            | 1             | 0           | 6.448676                | -1.083518 | -0.039373 |
| 43            | 1             | 0           | 6.165908                | -0.310141 | 1.521241  |

Frequencies -- 15.1587 19.1261 34.7484  
 Frequencies -- 41.9246 50.3578 60.4508  
 Frequencies -- 80.6977 112.2778 128.4730

Zero-point correction= 0.372991 (Hartree/Particle)  
 Thermal correction to Energy= 0.394355  
 Thermal correction to Enthalpy= 0.395300  
 Thermal correction to Gibbs Free Energy= 0.320572  
 Sum of electronic and zero-point Energies= -812.401882  
 Sum of electronic and thermal Energies= -812.380518  
 Sum of electronic and thermal Enthalpies= -812.379573  
 Sum of electronic and thermal Free Energies= -812.454301

b-aa-1-3c4-5a.log

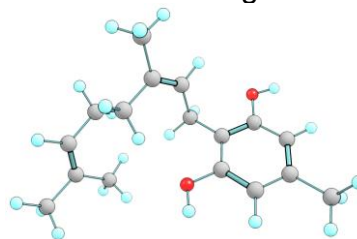

Standard orientation:

| Center Number | Atomic Number | Atomic Type | Coordinates (Angstroms) |           |           |
|---------------|---------------|-------------|-------------------------|-----------|-----------|
|               |               |             | X                       | Y         | Z         |
| 1             | 6             | 0           | -1.466343               | -1.069184 | -0.160657 |
| 2             | 6             | 0           | -2.597813               | -1.722463 | -0.667812 |
| 3             | 6             | 0           | -3.871271               | -1.186391 | -0.467028 |
| 4             | 6             | 0           | -3.995834               | 0.008940  | 0.250841  |
| 5             | 6             | 0           | -2.858460               | 0.648761  | 0.749283  |
| 6             | 6             | 0           | -1.567526               | 0.128617  | 0.558261  |
| 7             | 1             | 0           | -2.477276               | -2.650859 | -1.220848 |
| 8             | 1             | 0           | -4.977764               | 0.444108  | 0.421216  |
| 9             | 8             | 0           | -0.207732               | -1.584662 | -0.345486 |
| 10            | 1             | 0           | -0.267050               | -2.402283 | -0.857733 |
| 11            | 8             | 0           | -2.939856               | 1.821371  | 1.454967  |
| 12            | 1             | 0           | -3.867638               | 2.082563  | 1.534307  |
| 13            | 6             | 0           | -0.347514               | 0.858598  | 1.088856  |
| 14            | 6             | 0           | 0.004714                | 2.083452  | 0.270041  |
| 15            | 1             | 0           | 0.491906                | 0.163970  | 1.133286  |
| 16            | 1             | 0           | -0.556070               | 1.179009  | 2.116732  |
| 17            | 6             | 0           | 1.012628                | 2.194205  | -0.602176 |
| 18            | 1             | 0           | -0.656848               | 2.935775  | 0.417788  |
| 19            | 6             | 0           | 1.975736                | 1.061711  | -0.894976 |
| 20            | 1             | 0           | 1.471168                | 0.095524  | -0.815580 |
| 21            | 1             | 0           | 2.332917                | 1.144028  | -1.929742 |
| 22            | 6             | 0           | 3.204970                | 1.049640  | 0.052259  |
| 23            | 6             | 0           | 4.117223                | -0.113471 | -0.234344 |
| 24            | 1             | 0           | 2.841132                | 1.022735  | 1.085406  |
| 25            | 1             | 0           | 3.754985                | 1.992443  | -0.056621 |
| 26            | 6             | 0           | 4.030162                | -1.323990 | 0.290233  |
| 27            | 1             | 0           | 4.873892                | 0.054212  | -1.001236 |
| 28            | 6             | 0           | 4.953846                | -2.435335 | -0.142729 |
| 29            | 1             | 0           | 5.531433                | -2.821247 | 0.707819  |
| 30            | 1             | 0           | 4.381731                | -3.285887 | -0.537325 |
| 31            | 1             | 0           | 5.657446                | -2.111281 | -0.915182 |
| 32            | 6             | 0           | 1.278346                | 3.485598  | -1.336992 |
| 33            | 1             | 0           | 2.303603                | 3.834624  | -1.155578 |
| 34            | 1             | 0           | 0.591233                | 4.282262  | -1.037039 |
| 35            | 1             | 0           | 1.188833                | 3.344983  | -2.422394 |
| 36            | 6             | 0           | 3.002765                | -1.718828 | 1.322551  |
| 37            | 1             | 0           | 2.212865                | -2.329658 | 0.866771  |
| 38            | 1             | 0           | 2.515914                | -0.860325 | 1.790862  |
| 39            | 1             | 0           | 3.459436                | -2.325048 | 2.114285  |
| 40            | 6             | 0           | -5.099718               | -1.873219 | -1.015694 |
| 41            | 1             | 0           | -5.822782               | -2.084412 | -0.220092 |
| 42            | 1             | 0           | -4.848414               | -2.818612 | -1.503466 |
| 43            | 1             | 0           | -5.609415               | -1.240134 | -1.750994 |

Frequencies -- 14.9499 21.5263 41.3450  
 Frequencies -- 49.3413 55.4876 57.7551  
 Frequencies -- 70.4805 98.0272 121.8467

Zero-point correction= 0.372798 (Hartree/Particle)  
 Thermal correction to Energy= 0.394338  
 Thermal correction to Enthalpy= 0.395282  
 Thermal correction to Gibbs Free Energy= 0.320221  
 Sum of electronic and zero-point Energies= -812.401835  
 Sum of electronic and thermal Energies= -812.380295  
 Sum of electronic and thermal Enthalpies= -812.379351  
 Sum of electronic and thermal Free Energies= -812.454412

b-aa-1-3c4a5+.log

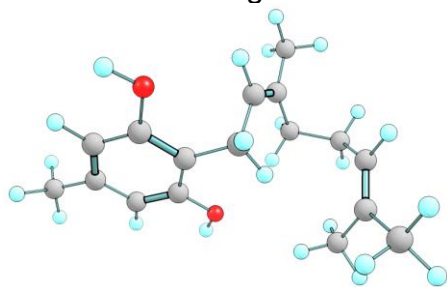

Standard orientation:

| Center Number | Atomic Number | Atomic Type | Coordinates (Angstroms) |           |           |
|---------------|---------------|-------------|-------------------------|-----------|-----------|
|               |               |             | X                       | Y         | Z         |
| 1             | 6             | 0           | -1.556806               | -1.008248 | -0.427946 |
| 2             | 6             | 0           | -2.850876               | -1.324386 | -0.860761 |
| 3             | 6             | 0           | -3.952249               | -0.630118 | -0.356448 |
| 4             | 6             | 0           | -3.740715               | 0.375796  | 0.592836  |
| 5             | 6             | 0           | -2.443534               | 0.678895  | 1.014455  |
| 6             | 6             | 0           | -1.319810               | 0.001136  | 0.514904  |
| 7             | 1             | 0           | -2.993299               | -2.114336 | -1.593484 |
| 8             | 1             | 0           | -4.584545               | 0.924978  | 1.003715  |
| 9             | 8             | 0           | -0.463742               | -1.684101 | -0.911466 |
| 10            | 1             | 0           | -0.747198               | -2.322658 | -1.579479 |
| 11            | 8             | 0           | -2.194794               | 1.659007  | 1.940809  |
| 12            | 1             | 0           | -3.032048               | 2.045909  | 2.230763  |
| 13            | 6             | 0           | 0.080405                | 0.371552  | 0.970392  |
| 14            | 6             | 0           | 0.535909                | 1.714535  | 0.436128  |
| 15            | 1             | 0           | 0.779209                | -0.413526 | 0.686932  |
| 16            | 1             | 0           | 0.085043                | 0.422302  | 2.065858  |
| 17            | 6             | 0           | 1.342365                | 1.941685  | -0.611938 |
| 18            | 1             | 0           | 0.122404                | 2.571988  | 0.965077  |
| 19            | 6             | 0           | 1.935204                | 0.849906  | -1.479649 |
| 20            | 1             | 0           | 1.349610                | -0.068024 | -1.399690 |
| 21            | 1             | 0           | 1.878525                | 1.169633  | -2.529342 |
| 22            | 6             | 0           | 3.418137                | 0.525513  | -1.158046 |
| 23            | 6             | 0           | 3.609488                | -0.053771 | 0.223040  |
| 24            | 1             | 0           | 4.020007                | 1.436575  | -1.257876 |
| 25            | 1             | 0           | 3.785416                | -0.167543 | -1.925387 |
| 26            | 6             | 0           | 3.445197                | -1.338335 | 0.574247  |
| 27            | 1             | 0           | 3.858705                | 0.659155  | 1.008022  |
| 28            | 6             | 0           | 3.585697                | -1.785911 | 2.009566  |
| 29            | 1             | 0           | 2.647944                | -2.230482 | 2.369061  |
| 30            | 1             | 0           | 4.354013                | -2.563746 | 2.108705  |
| 31            | 1             | 0           | 3.845378                | -0.958371 | 2.675427  |
| 32            | 6             | 0           | 1.704865                | 3.351943  | -1.018166 |
| 33            | 1             | 0           | 2.793318                | 3.491189  | -1.041050 |
| 34            | 1             | 0           | 1.285083                | 4.098019  | -0.337665 |
| 35            | 1             | 0           | 1.345673                | 3.571382  | -2.032183 |
| 36            | 6             | 0           | 3.036255                | -2.427576 | -0.389146 |
| 37            | 1             | 0           | 3.593373                | -3.351229 | -0.193845 |
| 38            | 1             | 0           | 3.189923                | -2.151242 | -1.434808 |
| 39            | 1             | 0           | 1.969275                | -2.655563 | -0.270057 |
| 40            | 6             | 0           | -5.349887               | -0.936783 | -0.841268 |
| 41            | 1             | 0           | -6.055475               | -0.999410 | -0.006179 |
| 42            | 1             | 0           | -5.386696               | -1.881268 | -1.390370 |
| 43            | 1             | 0           | -5.713224               | -0.147961 | -1.510096 |

Frequencies -- 16.0266            21.9868            32.6031  
 Frequencies -- 39.3866            51.9586            55.8862  
 Frequencies -- 66.4548            106.8037            125.6575

Zero-point correction=            0.372879 (Hartree/Particle)  
 Thermal correction to Energy=    0.394358  
 Thermal correction to Enthalpy= 0.395302  
 Thermal correction to Gibbs Free Energy= 0.320116  
 Sum of electronic and zero-point Energies= -812.401802  
 Sum of electronic and thermal Energies= -812.380322  
 Sum of electronic and thermal Enthalpies= -812.379378  
 Sum of electronic and thermal Free Energies= -812.454564

b-aa-1-3c4a5-.log

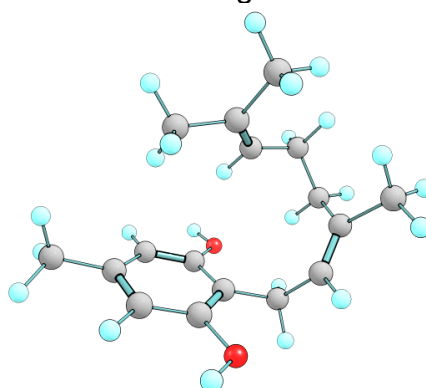

Standard orientation:

| Center Number | Atomic Number | Atomic Type | Coordinates (Angstroms) |           |           |
|---------------|---------------|-------------|-------------------------|-----------|-----------|
|               |               |             | X                       | Y         | Z         |
| 1             | 6             | 0           | 1.370904                | -0.589025 | 1.306060  |
| 2             | 6             | 0           | 2.414029                | 0.340936  | 1.218550  |
| 3             | 6             | 0           | 3.118681                | 0.500632  | 0.022644  |
| 4             | 6             | 0           | 2.774925                | -0.295857 | -1.073955 |
| 5             | 6             | 0           | 1.733248                | -1.222935 | -0.968734 |
| 6             | 6             | 0           | 0.999912                | -1.388321 | 0.216597  |
| 7             | 1             | 0           | 2.669609                | 0.943399  | 2.086962  |
| 8             | 1             | 0           | 3.314094                | -0.196095 | -2.013019 |
| 9             | 8             | 0           | 0.660505                | -0.747421 | 2.470217  |
| 10            | 1             | 0           | 0.988594                | -0.123019 | 3.131504  |
| 11            | 8             | 0           | 1.374058                | -2.025057 | -2.019990 |
| 12            | 1             | 0           | 1.940206                | -1.829546 | -2.779166 |
| 13            | 6             | 0           | -0.147317               | -2.380241 | 0.290553  |
| 14            | 6             | 0           | -1.338358               | -1.990168 | -0.564412 |
| 15            | 1             | 0           | -0.438609               | -2.504803 | 1.334298  |
| 16            | 1             | 0           | 0.215640                | -3.354718 | -0.057832 |
| 17            | 6             | 0           | -2.418195               | -1.283620 | -0.196647 |
| 18            | 1             | 0           | -1.272701               | -2.314743 | -1.601267 |
| 19            | 6             | 0           | -2.638471               | -0.720235 | 1.190735  |
| 20            | 1             | 0           | -3.575099               | -1.128467 | 1.598168  |
| 21            | 1             | 0           | -1.832910               | -1.021952 | 1.864612  |
| 22            | 6             | 0           | -2.739297               | 0.829928  | 1.226261  |
| 23            | 6             | 0           | -1.466099               | 1.487296  | 0.770505  |
| 24            | 1             | 0           | -2.947217               | 1.120169  | 2.265842  |
| 25            | 1             | 0           | -3.600714               | 1.161543  | 0.639685  |
| 26            | 6             | 0           | -1.263822               | 2.287905  | -0.286923 |
| 27            | 1             | 0           | -0.597800               | 1.224425  | 1.372209  |
| 28            | 6             | 0           | 0.120058                | 2.797849  | -0.614683 |
| 29            | 1             | 0           | 0.421701                | 2.479963  | -1.622000 |
| 30            | 1             | 0           | 0.148545                | 3.895906  | -0.615497 |
| 31            | 1             | 0           | 0.869839                | 2.428211  | 0.089450  |
| 32            | 6             | 0           | -3.515641               | -0.995707 | -1.195595 |
| 33            | 1             | 0           | -4.494537               | -1.299350 | -0.801594 |
| 34            | 1             | 0           | -3.350985               | -1.518535 | -2.141966 |
| 35            | 1             | 0           | -3.587827               | 0.075796  | -1.415405 |
| 36            | 6             | 0           | -2.335749               | 2.747254  | -1.244713 |
| 37            | 1             | 0           | -2.337132               | 3.842284  | -1.323265 |
| 38            | 1             | 0           | -3.340544               | 2.432418  | -0.957107 |
| 39            | 1             | 0           | -2.137844               | 2.365722  | -2.255196 |
| 40            | 6             | 0           | 4.202389                | 1.545151  | -0.097239 |
| 41            | 1             | 0           | 4.970433                | 1.245062  | -0.816083 |
| 42            | 1             | 0           | 4.687047                | 1.732845  | 0.865256  |
| 43            | 1             | 0           | 3.784534                | 2.498251  | -0.444443 |

Frequencies -- 28.7458            36.4724            42.6788  
 Frequencies -- 67.3636            70.7438            79.3538  
 Frequencies -- 96.9920            126.5334            141.1504

Zero-point correction=            0.373543 (Hartree/Particle)  
 Thermal correction to Energy=    0.394571  
 Thermal correction to Enthalpy= 0.395516  
 Thermal correction to Gibbs Free Energy= 0.323961  
 Sum of electronic and zero-point Energies= -812.405014  
 Sum of electronic and thermal Energies= -812.383985  
 Sum of electronic and thermal Enthalpies= -812.383041  
 Sum of electronic and thermal Free Energies= -812.454595



b-aa-1-3c4a5a.log

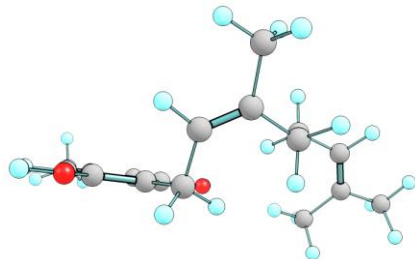

Standard orientation:

| Center Number | Atomic Number | Atomic Type | Coordinates (Angstroms) |           |           |
|---------------|---------------|-------------|-------------------------|-----------|-----------|
|               |               |             | X                       | Y         | Z         |
| 1             | 6             | 0           | 1.488663                | -1.042031 | 0.008760  |
| 2             | 6             | 0           | 2.541386                | -1.803889 | 0.527907  |
| 3             | 6             | 0           | 3.854662                | -1.330460 | 0.459112  |
| 4             | 6             | 0           | 4.094635                | -0.090825 | -0.141390 |
| 5             | 6             | 0           | 3.031429                | 0.657881  | -0.656666 |
| 6             | 6             | 0           | 1.705595                | 0.199838  | -0.604949 |
| 7             | 1             | 0           | 2.331019                | -2.766202 | 0.988430  |
| 8             | 1             | 0           | 5.108181                | 0.297514  | -0.207304 |
| 9             | 8             | 0           | 0.192232                | -1.486363 | 0.070497  |
| 10            | 1             | 0           | 0.163126                | -2.344924 | 0.514150  |
| 11            | 8             | 0           | 3.229653                | 1.881296  | -1.242522 |
| 12            | 1             | 0           | 4.173805                | 2.090371  | -1.234310 |
| 13            | 6             | 0           | 0.569063                | 1.040878  | -1.153920 |
| 14            | 6             | 0           | 0.150822                | 2.112365  | -0.171060 |
| 15            | 1             | 0           | -0.268956               | 0.392049  | -1.412104 |
| 16            | 1             | 0           | 0.912656                | 1.517859  | -2.080824 |
| 17            | 6             | 0           | -1.081226               | 2.364433  | 0.295306  |
| 18            | 1             | 0           | 0.974595                | 2.727898  | 0.190092  |
| 19            | 6             | 0           | -2.318970               | 1.587858  | -0.104825 |
| 20            | 1             | 0           | -3.176022               | 2.273607  | -0.141674 |
| 21            | 1             | 0           | -2.221233               | 1.166198  | -1.109975 |
| 22            | 6             | 0           | -2.647969               | 0.430658  | 0.875511  |
| 23            | 6             | 0           | -3.977219               | -0.209038 | 0.570771  |
| 24            | 1             | 0           | -2.669994               | 0.829914  | 1.897976  |
| 25            | 1             | 0           | -1.827582               | -0.290542 | 0.837868  |
| 26            | 6             | 0           | -4.207378               | -1.325403 | -0.138200 |
| 27            | 1             | 0           | -4.845670               | 0.336218  | 0.944427  |
| 28            | 6             | 0           | -5.613079               | -1.823639 | -0.375847 |
| 29            | 1             | 0           | -5.832312               | -1.882472 | -1.450355 |
| 30            | 1             | 0           | -5.740688               | -2.840396 | 0.019680  |
| 31            | 1             | 0           | -6.364499               | -1.180143 | 0.090980  |
| 32            | 6             | 0           | -1.316987               | 3.461159  | 1.307714  |
| 33            | 1             | 0           | -1.988228               | 4.230214  | 0.902998  |
| 34            | 1             | 0           | -0.385989               | 3.946652  | 1.614328  |
| 35            | 1             | 0           | -1.806508               | 3.068875  | 2.208667  |
| 36            | 6             | 0           | -3.129473               | -2.179819 | -0.759851 |
| 37            | 1             | 0           | -3.154000               | -3.196330 | -0.343901 |
| 38            | 1             | 0           | -2.124040               | -1.779608 | -0.624746 |
| 39            | 1             | 0           | -3.308130               | -2.287493 | -1.837866 |
| 40            | 6             | 0           | 4.990936                | -2.127895 | 1.054438  |
| 41            | 1             | 0           | 5.928883                | -1.946406 | 0.521496  |
| 42            | 1             | 0           | 4.783420                | -3.201554 | 1.027444  |
| 43            | 1             | 0           | 5.153750                | -1.853171 | 2.103834  |

Frequencies -- 17.0411      27.5302      44.9705  
 Frequencies -- 47.7020      54.7163      60.4578  
 Frequencies -- 75.9226      103.7202      127.2206

Zero-point correction= 0.373051 (Hartree/Particle)  
 Thermal correction to Energy= 0.394439  
 Thermal correction to Enthalpy= 0.395383  
 Thermal correction to Gibbs Free Energy= 0.321181  
 Sum of electronic and zero-point Energies= -812.402972  
 Sum of electronic and thermal Energies= -812.381584  
 Sum of electronic and thermal Enthalpies= -812.380640  
 Sum of electronic and thermal Free Energies= -812.454841
